# Supplementary material for: Transcriptomic and proteomic analyses of Desulfovibrio vulgaris biofilms: Carbon and energy flow contribute to the distinct biofilm growth state
Source: PubMed Central journal article supplement (PMC3431258; doi:10.1186/1471-2164-13-138), 2012-04-16
Supplement: 1471-2164-13-138-S3.pdf [file 1471-2164-13-138-S3.pdf]

**Additional file 3.** Whole genome transcript expression data for biofilm cells compared to planktonic, batch cells.

| <b>Locus Id</b> | <b>Locus Tag</b> | <b>GI#</b> | <b>Mean Log Ratio</b> | <b>z score</b> |
|-----------------|------------------|------------|-----------------------|----------------|
| VIMSS206065     | DVU0646          | 46579060   | -0.609446             | -0.902932      |
| VIMSS206066     | DVU0647          | 46579061   | 0.27352               | 0.327413       |
| VIMSS206067     | DVU0648          | 46579062   | -0.0246748            | -0.0301761     |
| VIMSS206069     | DVU0649          | 46579063   | 0.179496              | 0.254675       |
| VIMSS206070     | DVU0650          | 46579064   | -0.0206848            | -0.0146579     |
| VIMSS206071     | DVU0651          | 46579065   | -1.2427               | -1.63214       |
| VIMSS206072     | DVU0652          | 46579066   | 0.664438              | 0.887133       |
| VIMSS206074     | DVU0653          | 46579067   | -0.248998             | -0.407924      |
| VIMSS206075     | DVU0654          | 46579068   | -0.212501             | -0.348404      |
| VIMSS206076     | DVU0655          | 46579069   | 0.317065              | 0.527664       |
| VIMSS206078     | DVU0656          | 46579070   | 0.372877              | 0.633853       |
| VIMSS206079     | DVU0657          | 46579071   | 0.319002              | 0.546644       |
| VIMSS206081     | DVU0659          | 46579073   | 0.68799               | 1.26189        |
| VIMSS206083     | DVU0660          | 46579074   | 0.287079              | 0.439353       |
| VIMSS206084     | DVU0661          | 46579075   | -0.0553812            | -0.0852273     |
| VIMSS206085     | DVU0662          | 46579076   | 0.0747512             | 0.126154       |
| VIMSS206086     | DVU0663          | 46579077   | 1.59064               | 3.02861        |
| VIMSS206087     | DVU0664          | 46579078   | 0.363469              | 0.621251       |
| VIMSS206088     | DVU0665          | 46579079   | 0.536706              | 0.919464       |
| VIMSS206089     | DVU0666          | 46579080   | -0.10088              | -0.162769      |
| VIMSS206090     | DVU0667          | 46579081   | -0.684536             | -1.17476       |
| VIMSS206091     | DVU0668          | 46579082   | -0.384483             | -0.544104      |
| VIMSS206092     | DVU0669          | 46579083   | -1.17824              | -2.26902       |
| VIMSS206093     | DVU0670          | 46579084   | -0.784028             | -1.1468        |
| VIMSS206094     | DVU0671          | 46579085   | -2.19247              | -3.47453       |
| VIMSS206095     | DVU0672          | 46579086   | -1.72199              | -1.63583       |
| VIMSS206098     | DVU0674          | 46579088   | 0.18294               | 0.331779       |
| VIMSS206100     | DVU0676          | 46579090   | 1.05607               | 1.66069        |
| VIMSS206101     | DVU0677          | 46579091   | 0.907193              | 1.63671        |
| VIMSS206103     | DVU0679          | 46579093   | -0.473916             | -0.616658      |
| VIMSS206104     | DVU0680          | 46579094   | -0.0272281            | -0.0364521     |
| VIMSS206105     | DVU0681          | 46579095   | 1.22131               | 1.78504        |
| VIMSS206106     |                  |            | 0.00670685            | -0.0112323     |
| VIMSS206107     | DVU0683          | 46579097   | 0.612396              | 1.12504        |
| VIMSS206108     |                  |            | 1.01194               | 1.60153        |
| VIMSS206109     | DVU0685          | 46579099   | 0.544305              | 0.889837       |
| VIMSS206110     | DVU0686          | 46579100   | 0.762989              | 1.14136        |
| VIMSS206111     | DVU0687          | 46579101   | 0.317092              | 0.51969        |
| VIMSS206112     | DVU0688          | 46579102   | -0.531845             | -0.743432      |
| VIMSS206113     | DVU0689          | 46579103   | -0.237736             | -0.396983      |
| VIMSS206114     | DVU0690          | 46579104   | -0.252787             | -0.413254      |
| VIMSS206115     | DVU0691          | 46579105   | 0.23303               | 0.336476       |
| VIMSS206116     | DVU0692          | 46579106   | 0.139512              | 0.243456       |

|             |         |          |            |           |
|-------------|---------|----------|------------|-----------|
| VIMSS206117 | DVU0693 | 46579107 | -0.944452  | -1.35974  |
| VIMSS206118 | DVU0694 | 46579108 | -0.926777  | -1.15681  |
| VIMSS206121 | DVU0697 | 46579111 | 0.944853   | 1.60817   |
| VIMSS206122 | DVU0698 | 46579112 | -0.230896  | -0.383033 |
| VIMSS206124 | DVU0699 |          | 0.263389   | 0.4358    |
| VIMSS206125 | DVU0700 | 46579113 | 0.518434   | 0.739552  |
| VIMSS206126 | DVU0701 | 46579114 | 1.50243    | 2.63535   |
| VIMSS206127 | DVU0702 | 46579115 | 1.04865    | 1.44134   |
| VIMSS206128 | DVU0703 | 46579116 | -0.86161   | -1.26151  |
| VIMSS206129 | DVU0704 | 46579117 | -0.918684  | -1.69756  |
| VIMSS206130 | DVU0706 | 46579119 | -0.292937  | -0.470127 |
| VIMSS206131 | DVU0705 | 46579118 | 0.766116   | 0.905274  |
| VIMSS206132 | DVU0707 | 46579120 | 0.252623   | 0.472271  |
| VIMSS206135 | DVU0710 | 46579123 | 0.150977   | 0.102361  |
| VIMSS206136 | DVU0711 | 46579124 | 0.590649   | 0.857744  |
| VIMSS206137 | DVU0712 | 46579125 | 2.01488    | 3.3365    |
| VIMSS206138 | DVU0713 | 46579126 | 0.261848   | 0.35852   |
| VIMSS206139 | DVU0714 | 46579127 | 0.215198   | 0.317172  |
| VIMSS206140 | DVU0715 | 46579128 | -0.776514  | -1.03143  |
| VIMSS206141 | DVU0716 | 46579129 | -0.794704  | -1.26012  |
| VIMSS206142 | DVU0717 | 46579130 | 0.105959   | 0.145414  |
| VIMSS206145 | DVU0720 | 46579133 | 0.264866   | 0.403104  |
| VIMSS206146 |         |          | 1.31923    | 1.91308   |
| VIMSS206147 | DVU0722 | 46579135 | 1.00861    | 0.984116  |
| VIMSS206149 | DVU0723 | 46579136 | -0.631829  | -0.914996 |
| VIMSS206150 | DVU0724 | 46579137 | -1.30074   | -2.22792  |
| VIMSS206151 | DVU0725 | 46579138 | 1.05737    | 1.62268   |
| VIMSS206152 | DVU0726 | 46579139 | -0.677884  | -1.07742  |
| VIMSS206153 | DVU0727 | 46579140 | -0.170157  | -0.264855 |
| VIMSS206154 | DVU0728 | 46579141 | 0.542163   | 0.659468  |
| VIMSS206155 | DVU0729 | 46579142 | 1.60774    | 2.95388   |
| VIMSS206156 | DVU0730 | 46579143 | 0.151391   | 0.268219  |
| VIMSS206157 | DVU0731 | 46579144 | 0.580263   | 0.684529  |
| VIMSS206158 | DVU0732 | 46579145 | -1.04182   | -1.47992  |
| VIMSS206159 | DVU0733 | 46579146 | 0.331601   | 0.479131  |
| VIMSS206160 | DVU0734 | 46579147 | -0.861656  | -1.30533  |
| VIMSS206161 | DVU0735 | 46579148 | 0.225296   | 0.320706  |
| VIMSS206162 | DVU0736 | 46579149 | 0.771916   | 1.10384   |
| VIMSS206163 | DVU0737 | 46579150 | -0.0971069 | -0.136156 |
| VIMSS206164 | DVU0738 | 46579151 | 1.2993     | 2.23188   |
| VIMSS206165 | DVU0739 | 46579152 | 1.38251    | 1.68657   |
| VIMSS206166 | DVU0740 | 46579153 | -0.642447  | -0.833605 |
| VIMSS206167 | DVU0741 | 46579154 | 1.35021    | 2.41461   |
| VIMSS206168 | DVU0742 | 46579155 | 1.50597    | 2.28199   |
| VIMSS206169 | DVU0743 | 46579156 | 0.221871   | 0.295969  |
| VIMSS206170 | DVU0744 | 46579157 | 0.355459   | 0.604653  |
| VIMSS206171 | DVU0745 | 46579158 | -0.757596  | -0.944974 |
| VIMSS206172 | DVU0746 | 46579159 | -1.02236   | -1.22895  |
| VIMSS206173 | DVU0747 | 46579160 | -0.0858771 | -0.108851 |

|             |         |          |            |            |
|-------------|---------|----------|------------|------------|
| VIMSS206175 | DVU0749 | 46579162 | -0.305531  | -0.326241  |
| VIMSS206176 | DVU0750 | 46579163 | 0.614523   | 0.895703   |
| VIMSS206177 | DVU0751 | 46579164 | 0.685117   | 0.796821   |
| VIMSS206178 | DVU0752 | 46579165 | 0.370237   | 0.580734   |
| VIMSS206179 | DVU0753 | 46579166 | -0.332793  | -0.443324  |
| VIMSS206180 | DVU0754 | 46579167 | 1.74166    | 3.04567    |
| VIMSS206181 | DVU0755 | 46579168 | 1.45771    | 2.04807    |
| VIMSS206182 | DVU0756 | 46579169 | 0.627007   | 0.902691   |
| VIMSS206183 | DVU0757 | 46579170 | -0.547132  | -0.684512  |
| VIMSS206184 | DVU0758 | 46579171 | 1.95466    | 2.62168    |
| VIMSS206185 | DVU0759 | 46579172 | -0.0177318 | -0.0275085 |
| VIMSS206186 | DVU0760 | 46579173 | 0.389518   | 0.52504    |
| VIMSS206187 | DVU0761 | 46579174 | -0.194029  | -0.25549   |
| VIMSS206188 | DVU0762 | 46579175 | 0.79557    | 1.371      |
| VIMSS206189 | DVU0763 | 46579176 | -1.44312   | -1.67582   |
| VIMSS206190 |         |          | -2.80845   | -4.67068   |
| VIMSS206191 | DVU0765 | 46579178 | -0.303991  | -0.368745  |
| VIMSS206193 | DVU0766 | 46579179 | 1.45543    | 1.94696    |
| VIMSS206194 | DVU0767 | 46579180 | -0.735283  | -1.17024   |
| VIMSS206195 | DVU0768 | 46579181 | -0.465395  | -0.561554  |
| VIMSS206196 | DVU0769 | 46579182 | -0.603308  | -0.915367  |
| VIMSS206197 | DVU0770 | 46579183 | -0.351869  | -0.36147   |
| VIMSS206198 | DVU0771 | 46579184 | -0.306474  | -0.429395  |
| VIMSS206199 | DVU0772 | 46579185 | 0.601079   | 0.564306   |
| VIMSS206200 | DVU0773 | 46579186 | 2.69773    | 3.95357    |
| VIMSS206201 | DVU0774 | 46579187 | -1.1071    | -1.26503   |
| VIMSS206202 | DVU0775 | 46579188 | -0.735086  | -0.885375  |
| VIMSS206203 | DVU0776 | 46579189 | -1.18624   | -1.16966   |
| VIMSS206204 | DVU0777 | 46579190 | -0.694746  | -0.708675  |
| VIMSS206205 | DVU0778 | 46579191 | -1.89234   | -2.51924   |
| VIMSS206206 | DVU0779 | 46579192 | -1.425     | -1.83323   |
| VIMSS206207 | DVU0780 | 46579193 | -0.853696  | -1.32082   |
| VIMSS206211 | DVU0784 | 46579197 | -1.10505   | -1.36996   |
| VIMSS206212 | DVU0785 | 46579198 | -0.24528   | -0.35504   |
| VIMSS206213 | DVU0786 | 46579199 | -0.0304676 | -0.0386782 |
| VIMSS206214 | DVU0787 | 46579200 | -0.0842764 | -0.120614  |
| VIMSS206215 | DVU0788 | 46579201 | -1.37201   | -1.56925   |
| VIMSS206216 | DVU0789 | 46579202 | -0.0972556 | -0.16489   |
| VIMSS206217 | DVU0790 | 46579203 | -1.16269   | -1.5621    |
| VIMSS206218 | DVU0791 | 46579204 | -0.267287  | -0.437328  |
| VIMSS206219 | DVU0792 | 46579205 | 0.0596027  | 0.0735075  |
| VIMSS206220 | DVU0793 | 46579206 | -0.65308   | -1.03711   |
| VIMSS206221 | DVU0794 | 46579207 | -1.2071    | -1.50234   |
| VIMSS206222 | DVU0795 | 46579208 | -1.82364   | -2.13889   |
| VIMSS206223 | DVU0796 | 46579209 | -1.24103   | -1.67549   |
| VIMSS206224 | DVU0798 | 46579211 | -0.748718  | -0.822841  |
| VIMSS206225 | DVU0799 | 46579212 | 2.31848    | 3.77833    |
| VIMSS206227 | DVU0801 | 46579214 | 0.116062   | 0.125608   |
| VIMSS206228 | DVU0802 | 46579215 | -1.82659   | -1.97061   |

|             |         |           |            |           |
|-------------|---------|-----------|------------|-----------|
| VIMSS206229 | DVU0803 | 46579216  | 0.609673   | 0.752367  |
| VIMSS206230 | DVU0804 | 46579217  | 1.12086    | 1.02128   |
| VIMSS206231 | DVU0805 | 46579218  | 0.0636254  | 0.0856305 |
| VIMSS206232 | DVU0806 | 46579219  | 0.658636   | 1.15646   |
| VIMSS206233 | DVU0807 | 46579220  | -0.671519  | -0.892995 |
| VIMSS206234 | DVU0808 | 46579221  | -0.301631  | -0.46479  |
| VIMSS206235 | DVU0809 | 46579222  | -0.459329  | -0.688513 |
| VIMSS206236 | DVU0810 | 46579223  | 0.187541   | 0.324391  |
| VIMSS206238 | DVU0811 | 46579224  | 0.739273   | 1.0953    |
| VIMSS206239 | DVU0812 | 46579225  | 0.704672   | 1.03015   |
| VIMSS206240 | DVU0813 | 46579226  | 1.09979    | 1.81845   |
| VIMSS206241 | DVU0814 | 304569687 | 0.0155227  | 0.0202612 |
| VIMSS206242 | DVU0815 | 46579228  | 0.589533   | 1.03207   |
| VIMSS206243 | DVU0816 | 46579229  | 0.233209   | 0.30801   |
| VIMSS206244 | DVU0817 | 46579230  | -0.943748  | -1.71256  |
| VIMSS206245 | DVU0818 | 46579231  | -0.860724  | -1.10511  |
| VIMSS206246 | DVU0819 | 46579232  | 1.06786    | 1.86959   |
| VIMSS206248 | DVU0821 | 46579234  | 0.161516   | 0.236405  |
| VIMSS206249 | DVU0822 | 46579235  | 0.1719     | 0.222171  |
| VIMSS206250 | DVU0823 | 46579236  | -0.329644  | -0.474319 |
| VIMSS206252 | DVU0825 | 46579238  | -0.0939562 | -0.153821 |
| VIMSS206253 | DVU0826 | 46579239  | -0.356341  | -0.392303 |
| VIMSS206254 | DVU0827 | 46579240  | -0.792206  | -1.44355  |
| VIMSS206256 | DVU0828 | 46579241  | -0.313215  | -0.361911 |
| VIMSS206257 | DVU0829 | 46579242  | 0.158725   | 0.275347  |
| VIMSS206258 | DVU0830 | 46579243  | -0.348639  | -0.438165 |
| VIMSS206259 | DVU0831 | 46579244  | 0.266183   | 0.410346  |
| VIMSS206260 | DVU0832 | 46579245  | -0.508164  | -0.699507 |
| VIMSS206261 | DVU0834 | 46579247  | -0.326458  | -0.41891  |
| VIMSS206262 | DVU0835 | 46579248  | -1.39349   | -1.93051  |
| VIMSS206263 | DVU0836 | 46579249  | -1.21172   | -1.87778  |
| VIMSS206264 | DVU0837 | 46579250  | -0.23522   | -0.318993 |
| VIMSS206265 | DVU0838 | 46579251  | -0.34101   | -0.557237 |
| VIMSS206266 | DVU0839 | 46579252  | -0.914385  | -1.5167   |
| VIMSS206267 | DVU0840 | 46579253  | -1.53364   | -2.49507  |
| VIMSS206268 | DVU0841 | 46579254  | -0.130066  | -0.206239 |
| VIMSS206269 | DVU0842 | 46579255  | -0.92994   | -1.49278  |
| VIMSS206270 | DVU0843 | 304569688 | -0.0697755 | -0.102502 |
| VIMSS206272 | DVU0846 | 46579259  | 0.0241966  | 0.0330458 |
| VIMSS206274 | DVU0847 | 46579260  | -0.632561  | -0.770207 |
| VIMSS206275 | DVU0848 | 46579261  | -1.2589    | -1.64089  |
| VIMSS206276 | DVU0849 | 46579262  | -1.28556   | -1.90243  |
| VIMSS206277 | DVU0850 | 46579263  | -1.44009   | -1.88692  |
| VIMSS206279 | DVU0852 | 46579265  | -0.522312  | -0.50059  |
| VIMSS206280 |         |           | 0.525213   | 0.871916  |
| VIMSS206281 | DVU0854 | 46579267  | -0.454207  | -0.659092 |
| VIMSS206282 |         |           | -0.329631  | -0.495064 |
| VIMSS206283 | DVU0856 | 46579269  | -1.22948   | -1.73506  |
| VIMSS206285 | DVU0857 | 46579270  | 0.0148237  | 0.0226189 |

|             |         |          |            |            |
|-------------|---------|----------|------------|------------|
| VIMSS206286 | DVU0858 | 46579271 | 0.839631   | 0.93837    |
| VIMSS206287 |         |          | 0.842313   | 1.14809    |
| VIMSS206289 | DVU0861 | 46579274 | 0.175063   | 0.200633   |
| VIMSS206290 | DVU0862 | 46579275 | 0.613193   | 0.882854   |
| VIMSS206291 | DVU0863 | 46579276 | -0.310013  | -0.534978  |
| VIMSS206292 | DVU0864 | 46579277 | -0.139785  | -0.212937  |
| VIMSS206293 | DVU0865 | 46579278 | 0.077914   | 0.127061   |
| VIMSS206294 | DVU0866 | 46579279 | -0.432507  | -0.740564  |
| VIMSS206295 | DVU0867 | 46579280 | -0.351718  | -0.53768   |
| VIMSS206296 | DVU0868 | 46579281 | 0.135293   | 0.219019   |
| VIMSS206297 | DVU0869 | 46579282 | -0.197364  | -0.299939  |
| VIMSS206298 | DVU0870 | 46579283 | 0.391621   | 0.6872     |
| VIMSS206299 | DVU0871 | 46579284 | -1.33596   | -2.33274   |
| VIMSS206300 | DVU0872 | 46579285 | 0.785238   | 1.17475    |
| VIMSS206301 | DVU0873 | 46579286 | -2.25894   | -3.15543   |
| VIMSS206302 | DVU0874 | 46579287 | -1.47142   | -2.0978    |
| VIMSS206303 | DVU0875 | 46579288 | 0.352333   | 0.43806    |
| VIMSS206304 | DVU0876 | 46579289 | 0.775969   | 1.22498    |
| VIMSS206306 | DVU0878 | 46579291 | 2.3757     | 3.41734    |
| VIMSS206308 |         |          | -1.84919   | -2.71731   |
| VIMSS206309 | DVU0881 | 46579294 | 1.38238    | 2.04187    |
| VIMSS206310 | DVU0882 | 46579295 | 1.48955    | 2.3764     |
| VIMSS206311 | DVU0883 | 46579296 | 1.1272     | 2.00722    |
| VIMSS206312 | DVU0884 | 46579297 | 0.704822   | 1.00631    |
| VIMSS206313 | DVU0885 | 46579298 | -0.656385  | -0.962527  |
| VIMSS206314 | DVU0886 | 46579299 | -0.352874  | -0.491024  |
| VIMSS206316 | DVU0888 | 46579301 | 1.01246    | 1.5677     |
| VIMSS206318 | DVU0890 | 46579303 | -0.601212  | -0.936668  |
| VIMSS206319 | DVU0891 | 46579304 | -0.970654  | -1.57077   |
| VIMSS206320 | DVU0892 | 46579305 | 0.867531   | 1.24002    |
| VIMSS206321 | DVU0893 | 46579306 | -0.207813  | -0.387266  |
| VIMSS206323 | DVU0895 | 46579308 | -0.291703  | -0.454624  |
| VIMSS206324 | DVU0896 | 46579309 | 0.507495   | 0.813426   |
| VIMSS206325 | DVU0897 | 46579310 | 0.160893   | 0.229791   |
| VIMSS206327 | DVU0899 | 46579312 | 0.0610005  | 0.100641   |
| VIMSS206328 | DVU0900 | 46579313 | -0.197235  | -0.278044  |
| VIMSS206329 | DVU0901 | 46579314 | -0.0110612 | -0.0129965 |
| VIMSS206330 | DVU0902 | 46579315 | -0.328203  | -0.459656  |
| VIMSS206331 | DVU0903 | 46579316 | 0.527891   | 0.799313   |
| VIMSS206332 | DVU0904 | 46579317 | 0.271065   | 0.292704   |
| VIMSS206333 | DVU0905 | 46579318 | -0.365005  | -0.514757  |
| VIMSS206334 | DVU0906 | 46579319 | 0.268302   | 0.310752   |
| VIMSS206335 | DVU0907 | 46579320 | -0.109433  | -0.151364  |
| VIMSS206336 | DVU0908 | 46579321 | -1.17489   | -1.58471   |
| VIMSS206337 | DVU0909 | 46579322 | 0.621726   | 0.890696   |
| VIMSS206338 | DVU0910 | 46579323 | 1.23168    | 2.09443    |
| VIMSS206339 | DVU0911 | 46579324 | -1.98314   | -3.07417   |
| VIMSS206340 | DVU0912 | 46579325 | 0.363147   | 0.630309   |
| VIMSS206341 | DVU0913 | 46579326 | 0.0523159  | 0.0882077  |

|             |         |          |            |           |
|-------------|---------|----------|------------|-----------|
| VIMSS206343 | DVU0914 | 46579327 | -0.260172  | -0.336229 |
| VIMSS206344 | DVU0915 | 46579328 | 0.767206   | 1.19831   |
| VIMSS206345 | DVU0916 | 46579329 | 0.13648    | 0.223548  |
| VIMSS206347 | DVU0917 | 46579330 | 1.01669    | 1.59251   |
| VIMSS206348 | DVU0918 | 46579331 | 0.33205    | 0.552099  |
| VIMSS206349 | DVU0919 | 46579332 | -0.176128  | -0.319044 |
| VIMSS206350 |         |          | 0.364344   | 0.438434  |
| VIMSS206351 | DVU0921 | 46579334 | 0.424479   | 0.398307  |
| VIMSS206352 | DVU0922 | 46579335 | 0.324977   | 0.375169  |
| VIMSS206353 | DVU0923 | 46579336 | -0.750702  | -1.05715  |
| VIMSS206355 | DVU0924 | 46579337 | -0.447008  | -0.539418 |
| VIMSS206356 | DVU0925 | 46579338 | -0.221111  | -0.307725 |
| VIMSS206357 | DVU0926 | 46579339 | -0.9151    | -1.10367  |
| VIMSS206358 | DVU0927 | 46579340 | -1.42935   | -2.10217  |
| VIMSS206359 | DVU0928 | 46579341 | -1.74224   | -2.9964   |
| VIMSS206360 | DVU0929 | 46579342 | -0.704538  | -0.840002 |
| VIMSS206361 | DVU0930 | 46579343 | -0.226817  | -0.320839 |
| VIMSS206362 | DVU0931 | 46579344 | -0.371858  | -0.555918 |
| VIMSS206363 | DVU0932 | 46579345 | 0.557458   | 0.912092  |
| VIMSS206364 | DVU0933 | 46579346 | 0.20601    | 0.291105  |
| VIMSS206365 | DVU0934 | 46579347 | -0.236323  | -0.298316 |
| VIMSS206366 | DVU0935 | 46579348 | 1.62106    | 2.24016   |
| VIMSS206367 |         |          | -1.56616   | -2.05629  |
| VIMSS206368 | DVU0937 | 46579350 | 0.223364   | 0.289939  |
| VIMSS206369 | DVU0938 | 46579351 | 1.54589    | 2.29339   |
| VIMSS206370 | DVU0939 | 46579352 | 1.24694    | 1.96879   |
| VIMSS206371 | DVU0940 | 46579353 | -0.252335  | -0.275658 |
| VIMSS206373 | DVU0941 | 46579354 | 0.0181882  | 0.0302183 |
| VIMSS206374 | DVU0942 | 46579355 | 0.732327   | 0.990614  |
| VIMSS206375 |         |          | 0.425083   | 0.496023  |
| VIMSS206376 | DVU0944 | 46579357 | 0.723928   | 0.934407  |
| VIMSS206377 | DVU0945 | 46579358 | 0.889057   | 1.27517   |
| VIMSS206378 | DVU0946 | 46579359 | 0.23339    | 0.394192  |
| VIMSS206379 | DVU0947 | 46579360 | -0.383927  | -0.486249 |
| VIMSS206380 | DVU0948 | 46579361 | -0.617781  | -0.628359 |
| VIMSS206381 | DVU0949 | 46579362 | -1.17373   | -1.21868  |
| VIMSS206383 |         |          | -0.867772  | -1.15878  |
| VIMSS206384 | DVU0952 | 46579365 | -0.0670207 | -0.112797 |
| VIMSS206385 | DVU0953 | 46579366 | -1.5038    | -1.7696   |
| VIMSS206386 | DVU0954 | 46579367 | -0.501532  | -0.585525 |
| VIMSS206387 | DVU0955 | 46579368 | 0.587751   | 0.879576  |
| VIMSS206388 | DVU0956 | 46579369 | -1.00674   | -1.53544  |
| VIMSS206389 | DVU0957 | 46579370 | -1.57265   | -2.02306  |
| VIMSS206390 | DVU0958 | 46579371 | -1.23631   | -1.93627  |
| VIMSS206391 | DVU0959 | 46579372 | -2.27103   | -2.75062  |
| VIMSS206393 | DVU0961 | 46579374 | 0.986643   | 1.34702   |
| VIMSS206395 | DVU0963 | 46579376 | 0.76733    | 1.14047   |
| VIMSS206398 | DVU0966 | 46579379 | -0.537221  | -0.945275 |
| VIMSS206399 | DVU0967 | 46579380 | -0.691927  | -1.02163  |

|             |         |           |            |            |
|-------------|---------|-----------|------------|------------|
| VIMSS206400 | DVU0968 | 46579381  | -0.371171  | -0.525444  |
| VIMSS206401 | DVU0969 | 46579382  | 0.673948   | 0.89813    |
| VIMSS206402 | DVU0970 | 46579383  | 0.470889   | 0.667233   |
| VIMSS206403 | DVU0971 | 304569689 | 1.27482    | 1.68244    |
| VIMSS206404 | DVU0972 | 46579385  | -0.13965   | -0.150438  |
| VIMSS206405 | DVU0973 | 46579386  | -0.247136  | -0.24925   |
| VIMSS206406 | DVU0974 | 46579387  | 0.357593   | 0.577152   |
| VIMSS206407 | DVU0975 | 46579388  | 0.214675   | 0.283378   |
| VIMSS206408 | DVU0976 | 46579389  | 1.28134    | 1.89324    |
| VIMSS206410 | DVU0978 | 46579391  | -0.021141  | -0.0325617 |
| VIMSS206411 | DVU0979 | 46579392  | 1.81109    | 2.46229    |
| VIMSS206412 | DVU0980 | 46579393  | 1.29242    | 1.89949    |
| VIMSS206413 | DVU0981 | 46579394  | 1.22258    | 1.49941    |
| VIMSS206414 | DVU0982 | 46579395  | 0.513401   | 0.826537   |
| VIMSS206415 | DVU0983 | 46579396  | 0.698357   | 1.01987    |
| VIMSS206416 | DVU0984 | 46579397  | 0.49043    | 0.843354   |
| VIMSS206418 | DVU0987 | 46579400  | 1.30137    | 1.8788     |
| VIMSS206420 | DVU0988 | 46579401  | -0.108792  | -0.169847  |
| VIMSS206421 |         |           | 0.340162   | 0.483964   |
| VIMSS206422 | DVU0990 | 46579403  | -0.678579  | -1.0324    |
| VIMSS206423 | DVU0991 | 46579404  | -0.914599  | -1.20512   |
| VIMSS206424 | DVU0992 | 46579405  | 0.816741   | 1.22167    |
| VIMSS206425 | DVU0993 | 46579406  | -0.402661  | -0.55196   |
| VIMSS206426 | DVU0994 | 46579407  | -0.168035  | -0.216565  |
| VIMSS206427 | DVU0995 | 46579408  | 1.81975    | 2.88441    |
| VIMSS206428 | DVU0996 | 46579409  | 0.400778   | 0.482733   |
| VIMSS206429 | DVU0997 | 46579410  | 0.364843   | 0.526808   |
| VIMSS206430 | DVU0998 | 46579411  | 0.356501   | 0.541754   |
| VIMSS206433 | DVU0999 | 46579412  | -0.0166109 | -0.0179037 |
| VIMSS206434 | DVU1000 | 46579413  | -0.14656   | -0.172405  |
| VIMSS206435 | DVU1001 | 46579414  | 0.179364   | 0.257522   |
| VIMSS206436 | DVU1002 | 46579415  | 0.399391   | 0.546049   |
| VIMSS206437 | DVU1003 | 46579416  | 0.378256   | 0.591762   |
| VIMSS206438 | DVU1004 | 46579417  | 1.51319    | 1.87859    |
| VIMSS206439 | DVU1005 | 46579418  | 0.902085   | 1.60559    |
| VIMSS206440 | DVU1006 | 46579419  | 0.355966   | 0.49571    |
| VIMSS206441 | DVU1007 | 46579420  | 0.521348   | 0.668326   |
| VIMSS206442 | DVU1008 | 46579421  | -0.358256  | -0.45836   |
| VIMSS206443 | DVU1009 | 46579422  | -0.329659  | -0.521092  |
| VIMSS206446 | DVU1012 | 46579425  | 1.55175    | 2.11465    |
| VIMSS206447 | DVU1013 | 46579426  | 2.03527    | 3.25398    |
| VIMSS206451 | DVU1017 | 46579430  | -0.309239  | -0.399761  |
| VIMSS206452 | DVU1018 | 304569690 | -0.051561  | -0.0621318 |
| VIMSS206453 | DVU1019 | 46579432  | -0.485747  | -0.735945  |
| VIMSS206454 | DVU1020 | 46579433  | 0.025646   | 0.0276472  |
| VIMSS206455 | DVU1021 | 46579434  | -0.990003  | -1.32269   |
| VIMSS206456 | DVU1022 | 46579435  | -1.45453   | -1.91134   |
| VIMSS206458 | DVU1024 | 46579437  | -0.404317  | -0.47613   |
| VIMSS206459 | DVU1025 | 46579438  | -0.316662  | -0.466937  |

|             |         |           |            |            |
|-------------|---------|-----------|------------|------------|
| VIMSS206460 | DVU1026 | 46579439  | -0.0544503 | -0.0570638 |
| VIMSS206461 | DVU1027 | 46579440  | 0.322843   | 0.46251    |
| VIMSS206462 | DVU1028 | 46579441  | -0.0430197 | -0.0697221 |
| VIMSS206463 | DVU1029 | 46579442  | -2.97339   | -5.3232    |
| VIMSS206465 | DVU1030 | 46579443  | 0.852488   | 1.43024    |
| VIMSS206466 | DVU1032 | 46579445  | 0.235315   | 0.237735   |
| VIMSS206467 | DVU1033 | 46579446  | 0.96912    | 1.7023     |
| VIMSS206468 | DVU1034 | 46579447  | -0.0302064 | -0.0382695 |
| VIMSS206469 | DVU1035 | 304569691 | 2.31188    | 4.17586    |
| VIMSS206470 | DVU1036 | 46579449  | -0.0603905 | -0.0607181 |
| VIMSS206471 | DVU1037 | 46579450  | 0.445938   | 0.782211   |
| VIMSS206472 | DVU1038 | 46579451  | -1.08976   | -1.80698   |
| VIMSS206473 | DVU1039 | 46579452  | -0.68513   | -1.2258    |
| VIMSS206474 | DVU1040 | 304569692 | -0.490891  | -0.884601  |
| VIMSS206475 | DVU1041 | 46579454  | -0.387745  | -0.639409  |
| VIMSS206476 | DVU1042 | 46579455  | -0.977095  | -1.5071    |
| VIMSS206477 | DVU1043 | 46579456  | -0.599234  | -0.958642  |
| VIMSS206478 | DVU1044 | 46579457  | -0.31998   | -0.2102    |
| VIMSS206479 | DVU1045 | 46579458  | -0.0590766 | -0.0942439 |
|             |         |           | -          | -          |
| VIMSS206480 | DVU1046 | 46579459  | 0.00640225 | 0.00902818 |
| VIMSS206481 | DVU1047 | 46579460  | 0.200514   | 0.350163   |
| VIMSS206482 | DVU1048 | 46579461  | -0.329581  | -0.48822   |
| VIMSS206483 | DVU1049 | 46579462  | -0.0376929 | -0.0580564 |
| VIMSS206484 | DVU1050 | 46579463  | 0.828683   | 1.10812    |
| VIMSS206485 | DVU1051 | 46579464  | 0.40049    | 0.69237    |
| VIMSS206488 | DVU1054 | 46579467  | -0.766799  | -1.14975   |
| VIMSS206489 | DVU1055 | 46579468  | -0.855913  | -1.16655   |
| VIMSS206490 | DVU1056 | 46579469  | -0.568826  | -0.830255  |
| VIMSS206491 | DVU1057 | 46579470  | 0.750296   | 0.871431   |
| VIMSS206492 | DVU1058 | 46579471  | 0.778091   | 1.03002    |
| VIMSS206494 | DVU1060 | 46579473  | -1.25606   | -1.74415   |
| VIMSS206495 | DVU1061 | 46579474  | -0.0731012 | -0.110299  |
| VIMSS206496 | DVU1062 | 46579475  | -0.559792  | -0.957112  |
| VIMSS206497 |         |           | -0.0957536 | -0.145498  |
| VIMSS206498 | DVU1064 | 46579477  | -0.251939  | -0.433332  |
| VIMSS206499 | DVU1065 | 46579478  | -1.54506   | -2.72201   |
| VIMSS206500 | DVU1066 | 46579479  | -0.67326   | -1.14364   |
| VIMSS206501 | DVU1067 | 46579480  | 0.0522557  | 0.0960638  |
| VIMSS206502 | DVU1068 | 46579481  | 0.992762   | 1.07086    |
| VIMSS206503 | DVU1069 | 46579482  | -0.98192   | -1.3623    |
| VIMSS206505 | DVU1070 | 304569693 | 0.0714137  | 0.107893   |
| VIMSS206506 | DVU1071 | 46579484  | -0.334935  | -0.465622  |
| VIMSS206507 | DVU1072 | 46579485  | 0.207857   | 0.309731   |
| VIMSS206508 | DVU1073 | 46579486  | 2.25294    | 3.87907    |
| VIMSS206509 | DVU1074 | 46579487  | -2.20572   | -3.09515   |
| VIMSS206510 | DVU1075 | 46579488  | -0.916176  | -1.6233    |
| VIMSS206511 | DVU1076 | 46579489  | -0.750861  | -1.15816   |
| VIMSS206512 | DVU1077 | 46579490  | -1.46544   | -2.48822   |



|             |         |          |            |            |
|-------------|---------|----------|------------|------------|
| VIMSS206514 | DVU1079 | 46579492 | -0.235371  | -0.283987  |
| VIMSS206515 | DVU1080 | 46579493 | 1.40182    | 1.94918    |
| VIMSS206516 | DVU1081 | 46579494 | -1.84806   | -2.93632   |
| VIMSS206517 | DVU1082 | 46579495 | -1.37951   | -2.26467   |
| VIMSS206518 | DVU1083 | 46579496 | 1.67032    | 2.88431    |
| VIMSS206519 | DVU1084 | 46579497 | 0.0967903  | 0.143984   |
| VIMSS206520 | DVU1085 | 46579498 | -0.286975  | -0.43015   |
| VIMSS206521 |         |          | 0.752799   | 1.33024    |
| VIMSS206522 | DVU1087 | 46579500 | 1.66851    | 2.21374    |
| VIMSS206523 | DVU1088 | 46579501 | 1.19262    | 1.77123    |
| VIMSS206524 | DVU1089 | 46579502 | -0.975461  | -1.42165   |
| VIMSS206525 | DVU1090 | 46579503 | -1.01633   | -1.68707   |
| VIMSS206526 | DVU1091 | 46579504 | -0.345127  | -0.506644  |
| VIMSS206527 | DVU1092 | 46579505 | -0.88677   | -1.36641   |
| VIMSS206528 | DVU1093 | 46579506 | 1.18057    | 2.05205    |
| VIMSS206529 | DVU1094 | 46579507 | -1.1099    | -1.89576   |
| VIMSS206530 | DVU1095 | 46579508 | -2.00114   | -2.27717   |
| VIMSS206531 | DVU1096 | 46579509 | -0.699936  | -1.07683   |
| VIMSS206532 | DVU1097 | 46579510 | 0.126576   | 0.212341   |
| VIMSS206533 | DVU1098 | 46579511 | 0.897053   | 1.58162    |
| VIMSS206534 | DVU1099 | 46579512 | -0.0847221 | -0.122085  |
| VIMSS206535 | DVU1100 | 46579513 | -0.751219  | -0.866237  |
| VIMSS206538 | DVU1103 | 46579516 | 0.87989    | 1.36207    |
| VIMSS206539 | DVU1104 | 46579517 | 0.649673   | 0.805323   |
| VIMSS206540 | DVU1105 | 46579518 | 0.511376   | 0.647726   |
| VIMSS206541 | DVU1106 | 46579519 | 2.37947    | 3.52529    |
| VIMSS206542 | DVU1107 | 46579520 | -0.0470161 | -0.0531719 |
| VIMSS206544 | DVU1108 | 46579521 | -0.902006  | -1.29843   |
| VIMSS206545 | DVU1109 | 46579522 | -0.858432  | -0.912635  |
| VIMSS206546 | DVU1110 | 46579523 | -1.92626   | -2.47688   |
| VIMSS206547 | DVU1111 | 46579524 | -1.39712   | -2.02545   |
| VIMSS206549 | DVU1113 | 46579526 | -0.915893  | -1.14832   |
| VIMSS206550 | DVU1114 | 46579527 | -0.0828933 | -0.0985856 |
| VIMSS206551 | DVU1115 | 46579528 | 1.99506    | 2.92971    |
| VIMSS206552 | DVU1116 | 46579529 | 1.21314    | 1.46405    |
| VIMSS206553 | DVU1117 | 46579530 | 0.263287   | 0.406268   |
| VIMSS206554 | DVU1118 | 46579531 | 1.25709    | 1.39235    |
| VIMSS206556 | DVU1120 | 46579533 | 0.401979   | 0.474723   |
| VIMSS206557 | DVU1121 | 46579534 | 1.7283     | 3.03426    |
| VIMSS206558 | DVU1122 | 46579535 | 0.528304   | 0.620536   |
| VIMSS206559 | DVU1123 | 46579536 | 2.8057     | 3.11366    |
| VIMSS206560 | DVU1125 | 46579538 | 1.8283     | 2.97536    |
| VIMSS206561 | DVU1124 | 46579537 | 0.818125   | 0.930257   |
| VIMSS206562 | DVU1126 | 46579539 | -0.125451  | -0.112823  |
| VIMSS206564 | DVU1128 | 46579541 | 0.674253   | 0.844169   |
| VIMSS206565 | DVU1129 | 46579542 | 0.566242   | 0.417133   |
| VIMSS206566 | DVU1130 | 46579543 | 1.78697    | 2.24758    |
| VIMSS206567 | DVU1131 | 46579544 | 0.564902   | 0.578472   |
| VIMSS206568 | DVU1132 | 46579545 | 2.11593    | 3.1243     |

|             |         |          |            |            |
|-------------|---------|----------|------------|------------|
| VIMSS206569 | DVU1133 | 46579546 | 0.939144   | 1.15318    |
| VIMSS206570 | DVU1134 | 46579547 | 0.698619   | 1.10721    |
| VIMSS206571 | DVU1135 | 46579548 | 1.50251    | 1.83404    |
| VIMSS206572 | DVU1136 | 46579549 | 1.16432    | 2.04567    |
| VIMSS206573 | DVU1137 | 46579550 | 1.01362    | 1.15784    |
| VIMSS206574 | DVU1138 | 46579551 | 1.02955    | 1.4057     |
| VIMSS206575 | DVU1139 | 46579552 | 1.51717    | 1.66158    |
| VIMSS206576 |         |          | 1.18622    | 1.72098    |
| VIMSS206577 | DVU1141 | 46579554 | 0.670857   | 0.805133   |
| VIMSS206578 | DVU1142 | 46579555 | 1.63608    | 2.04089    |
| VIMSS206579 | DVU1143 | 46579556 | 3.053      | 3.6076     |
| VIMSS206580 | DVU1144 | 46579557 | -0.335976  | -0.576598  |
| VIMSS206582 | DVU1145 | 46579558 | -0.0245743 | -0.032128  |
| VIMSS206585 | DVU1147 | 46579559 | -1.99833   | -2.17867   |
| VIMSS206589 | DVU1151 | 46579562 | -0.166563  | -0.170416  |
| VIMSS206591 | DVU1153 | 46579564 | 0.281753   | 0.3799     |
| VIMSS206592 | DVU1154 | 46579565 | 0.215471   | 0.315949   |
| VIMSS206593 | DVU1155 | 46579566 | -0.651917  | -0.824979  |
| VIMSS206595 | DVU1157 | 46579568 | -0.996981  | -0.969725  |
| VIMSS206596 | DVU1158 | 46579569 | 0.768292   | 0.7543     |
| VIMSS206597 | DVU1159 | 46579570 | -0.776315  | -0.973814  |
| VIMSS206598 | DVU1160 | 46579571 | -0.367156  | -0.549277  |
| VIMSS206599 | DVU1161 | 46579572 | 0.0817956  | 0.0936644  |
| VIMSS206600 | DVU1162 | 46579573 | 0.153186   | 0.17375    |
| VIMSS206601 | DVU1163 | 46579574 | 0.0842294  | 0.110219   |
| VIMSS206602 | DVU1164 | 46579575 | 0.655326   | 0.982518   |
| VIMSS206603 | DVU1165 | 46579576 | 0.477926   | 0.680299   |
| VIMSS206604 | DVU1166 | 46579577 | -1.90488   | -2.54526   |
| VIMSS206608 | DVU1168 | 46579579 | 0.226183   | 0.33791    |
| VIMSS206609 | DVU1169 | 46579580 | 0.644029   | 0.973822   |
| VIMSS206610 | DVU1170 | 46579581 | -2.74499   | -4.58299   |
| VIMSS206613 | DVU1173 | 46579584 | -0.346826  | -0.508113  |
| VIMSS206614 | DVU1174 | 46579585 | 0.321654   | 0.545738   |
| VIMSS206615 |         |          | -0.105571  | -0.136589  |
| VIMSS206616 | DVU1176 | 46579587 | -1.15005   | -1.54906   |
| VIMSS206617 | DVU1177 | 46579588 | -1.34452   | -1.44724   |
| VIMSS206619 | DVU1179 | 46579590 | 1.97422    | 2.39756    |
| VIMSS206620 | DVU1180 | 46579591 | 0.589153   | 0.953101   |
| VIMSS206621 | DVU1181 | 46579592 | -0.318038  | -0.381295  |
| VIMSS206622 | DVU1182 | 46579593 | 0.134294   | 0.243351   |
| VIMSS206624 | DVU1185 | 46579596 | -0.525036  | -0.887375  |
| VIMSS206625 | DVU1186 | 46579597 | -0.893418  | -1.23403   |
| VIMSS206626 | DVU1187 | 46579598 | -0.70583   | -1.12548   |
| VIMSS206627 | DVU1188 | 46579599 | 0.437213   | 0.680081   |
| VIMSS206628 | DVU1189 | 46579600 | 0.348116   | 0.557309   |
| VIMSS206629 | DVU1190 | 46579601 | 1.11275    | 1.73139    |
| VIMSS206630 | DVU1191 | 46579602 | -0.538719  | -0.848457  |
| VIMSS206631 | DVU1192 | 46579603 | 1.05081    | 1.40808    |
| VIMSS206632 | DVU1193 | 46579604 | -0.0116167 | -0.0204954 |

|             |         |          |            |            |
|-------------|---------|----------|------------|------------|
| VIMSS206633 |         |          | -0.341868  | -0.543102  |
| VIMSS206634 | DVU1195 | 46579606 | -0.952578  | -1.35314   |
| VIMSS206635 | DVU1196 | 46579607 | -0.685464  | -0.9815    |
| VIMSS206636 | DVU1197 | 46579608 | -1.046     | -1.67239   |
| VIMSS206637 | DVU1198 | 46579609 | -1.2387    | -1.81306   |
| VIMSS206638 | DVU1199 | 46579610 | -2.10672   | -3.28      |
| VIMSS206639 | DVU1200 | 46579611 | -0.201561  | -0.208685  |
| VIMSS206640 | DVU1201 | 46579612 | -0.115133  | -0.21195   |
| VIMSS206641 | DVU1202 | 46579613 | -0.83048   | -1.1539    |
| VIMSS206642 | DVU1203 | 46579614 | -0.966248  | -1.48618   |
| VIMSS206643 | DVU1204 | 46579615 | -2.31603   | -2.13256   |
| VIMSS206644 | DVU1205 | 46579616 | -1.73031   | -2.47899   |
| VIMSS206645 |         |          | -1.59539   | -2.13364   |
| VIMSS206646 | DVU1207 | 46579618 | -2.21916   | -3.47775   |
| VIMSS206648 | DVU1209 | 46579620 | -0.748683  | -1.14257   |
| VIMSS206650 | DVU1211 | 46579622 | 0.475172   | 0.506907   |
| VIMSS206651 | DVU1212 | 46579623 | 0.626285   | 0.78245    |
| VIMSS206652 | DVU1213 | 46579624 | -0.390521  | -0.391179  |
| VIMSS206653 |         |          | -0.0853644 | -0.129531  |
| VIMSS206654 |         |          | -0.595437  | -0.78194   |
| VIMSS206656 | DVU1217 | 46579628 | -0.38907   | -0.567162  |
| VIMSS206657 | DVU1218 | 46579629 | 0.41865    | 0.702161   |
| VIMSS206658 | DVU1219 | 46579630 | 0.629579   | 0.9545     |
| VIMSS206659 | DVU1220 | 46579631 | -1.09888   | -1.83067   |
| VIMSS206660 | DVU1221 | 46579632 | -0.104827  | -0.152381  |
| VIMSS206661 | DVU1222 | 46579633 | -0.465396  | -0.671821  |
| VIMSS206662 |         |          | -0.592511  | -0.818658  |
| VIMSS206663 | DVU1224 | 46579635 | -0.468371  | -0.591279  |
| VIMSS206664 | DVU1226 | 46579637 | -1.03064   | -1.17905   |
| VIMSS206665 | DVU1225 | 46579636 | -0.611078  | -0.891678  |
| VIMSS206667 | DVU1228 | 46579639 | 0.294381   | 0.515062   |
| VIMSS206669 | DVU1230 | 46579641 | 0.077603   | 0.0799668  |
| VIMSS206670 | DVU1231 | 46579642 | -0.9212    | -1.32653   |
| VIMSS206671 | DVU1232 | 46579643 | 0.18386    | 0.303624   |
| VIMSS206672 | DVU1233 | 46579644 | 0.535203   | 0.600732   |
| VIMSS206674 | DVU1235 | 46579646 | -0.227418  | -0.30766   |
| VIMSS206675 | DVU1236 | 46579647 | -1.10274   | -1.50376   |
| VIMSS206676 | DVU1237 | 46579648 | -0.0556368 | -0.0811343 |
| VIMSS206677 | DVU1238 | 46579649 | -0.300657  | -0.449638  |
| VIMSS206678 | DVU1239 | 46579650 | 0.771686   | 1.18547    |
| VIMSS206679 | DVU1240 | 46579651 | -0.195392  | -0.269522  |
| VIMSS206680 | DVU1241 | 46579652 | -0.326047  | -0.55334   |
| VIMSS206681 | DVU1242 | 46579653 | -0.193023  | -0.334473  |
| VIMSS206682 | DVU1243 | 46579654 | -0.325099  | -0.403672  |
| VIMSS206683 | DVU1244 | 46579655 | 1.09006    | 1.96705    |
| VIMSS206684 | DVU1245 | 46579656 | -1.07713   | -1.90647   |
| VIMSS206685 | DVU1246 | 46579657 | 1.16395    | 1.56245    |
| VIMSS206686 | DVU1247 | 46579658 | -1.33988   | -2.37289   |
| VIMSS206687 | DVU1248 | 46579659 | -0.190762  | -0.319882  |

|             |         |          |            |            |
|-------------|---------|----------|------------|------------|
| VIMSS206688 | DVU1249 | 46579660 | -1.10538   | -1.58326   |
| VIMSS206689 | DVU1250 | 46579661 | -0.748734  | -1.0161    |
| VIMSS206690 | DVU1251 | 46579662 | -0.878433  | -1.23354   |
| VIMSS206691 | DVU1252 | 46579663 | 0.0409358  | 0.0581478  |
| VIMSS206692 | DVU1253 | 46579664 | -0.229731  | -0.383951  |
| VIMSS206693 | DVU1254 | 46579665 | -0.400049  | -0.552816  |
| VIMSS206694 | DVU1255 | 46579666 | -1.00116   | -1.22867   |
| VIMSS206695 |         |          | -1.09677   | -1.67667   |
| VIMSS206697 | DVU1258 | 46579669 | 0.0796442  | 0.123466   |
| VIMSS206699 | DVU1260 | 46579671 | -1.53718   | -2.29639   |
| VIMSS206700 | DVU1261 | 46579672 | -1.4116    | -2.23104   |
| VIMSS206701 | DVU1262 | 46579673 | 0.30648    | 0.571319   |
| VIMSS206702 | DVU1263 | 46579674 | 0.489997   | 0.684817   |
| VIMSS206703 | DVU1264 | 46579675 | -0.527281  | -0.617249  |
| VIMSS206704 | DVU1265 | 46579676 | -0.19112   | -0.250515  |
| VIMSS206705 | DVU1266 | 46579677 | 0.619165   | 0.940643   |
| VIMSS206706 | DVU1267 | 46579678 | 0.955304   | 1.72064    |
| VIMSS206708 | DVU1268 | 46579679 | 1.36538    | 1.28221    |
| VIMSS206709 | DVU1270 | 46579681 | -0.25074   | -0.312895  |
| VIMSS206710 | DVU1271 | 46579682 | -1.07891   | -1.56832   |
| VIMSS206711 | DVU1272 | 46579683 | -0.421228  | -0.520595  |
| VIMSS206712 | DVU1273 | 46579684 | 0.312242   | 0.525694   |
| VIMSS206713 | DVU1274 | 46579685 | -0.333013  | -0.605953  |
| VIMSS206714 | DVU1275 | 46579686 | -0.447667  | -0.669459  |
| VIMSS206715 | DVU1276 | 46579687 | -1.47457   | -2.21721   |
| VIMSS206716 | DVU1277 | 46579688 | -1.55804   | -2.03611   |
| VIMSS206718 | DVU1278 | 46579689 | 0.315369   | 0.367627   |
| VIMSS206719 | DVU1279 | 46579690 | 0.890132   | 1.46723    |
| VIMSS206720 | DVU1280 | 46579691 | -1.56928   | -2.44453   |
| VIMSS206721 | DVU1281 | 46579692 | -0.464571  | -0.789297  |
| VIMSS206723 | DVU1282 | 46579693 | -0.148693  | -0.229289  |
| VIMSS206724 | DVU1283 | 46579694 | 0.696419   | 1.06649    |
| VIMSS206725 | DVU1284 | 46579695 | -0.445325  | -0.551921  |
| VIMSS206726 |         |          | -0.12705   | -0.211312  |
| VIMSS206727 | DVU1286 | 46579697 | 0.374355   | 0.664523   |
| VIMSS206728 | DVU1287 | 46579698 | -0.151097  | -0.236038  |
| VIMSS206729 | DVU1288 | 46579699 | -0.883106  | -1.05291   |
| VIMSS206730 | DVU1289 | 46579700 | -1.40881   | -1.75252   |
| VIMSS206732 |         |          | -0.810796  | -1.46488   |
| VIMSS206733 | DVU1292 | 46579703 | 0.00631183 | 0.00861674 |
| VIMSS206735 | DVU1294 | 46579705 | -2.25598   | -3.08733   |
| VIMSS206736 | DVU1295 | 46579706 | -0.567136  | -0.726247  |
| VIMSS206738 | DVU1297 | 46579708 | -1.44589   | -1.90151   |
| VIMSS206739 | DVU1298 | 46579709 | -0.822767  | -1.37939   |
| VIMSS206740 | DVU1299 | 46579710 | -2.65287   | -3.22633   |
| VIMSS206742 | DVU1300 | 46579711 | -1.78527   | -2.80753   |
| VIMSS206743 | DVU1301 | 46579712 | -0.210568  | -0.370447  |
| VIMSS206744 | DVU1302 | 46579713 | -0.913887  | -1.42654   |
| VIMSS206745 | DVU1303 | 46579714 | -2.33212   | -3.43923   |

|             |         |          |            |            |
|-------------|---------|----------|------------|------------|
| VIMSS206746 | DVU1304 | 46579715 | -1.92682   | -2.88773   |
| VIMSS206747 | DVU1305 | 46579716 | -2.76209   | -4.09074   |
| VIMSS206748 | DVU1306 | 46579717 | -1.84138   | -2.68178   |
| VIMSS206749 | DVU1307 | 46579718 | -1.80417   | -2.65214   |
| VIMSS206750 | DVU1308 | 46579719 | -1.4382    | -2.00705   |
| VIMSS206751 | DVU1309 | 46579720 | -1.67331   | -2.43594   |
| VIMSS206752 | DVU1310 | 46579721 | -1.93094   | -2.5771    |
| VIMSS206753 | DVU1311 | 46579722 | -2.26704   | -3.36529   |
| VIMSS206754 | DVU1312 | 46579723 | -1.5004    | -2.29678   |
| VIMSS206755 | DVU1313 | 46579724 | -2.01624   | -3.11961   |
| VIMSS206756 | DVU1314 | 46579725 | -0.803753  | -1.05774   |
| VIMSS206757 | DVU1315 | 46579726 | -2.16293   | -3.45808   |
| VIMSS206758 | DVU1316 | 46579727 | -1.52825   | -2.34169   |
| VIMSS206759 | DVU1317 | 46579728 | -2.04552   | -3.06232   |
| VIMSS206760 | DVU1318 | 46579729 | -1.77124   | -2.68555   |
| VIMSS206761 | DVU1319 | 46579730 | -2.19746   | -3.6571    |
| VIMSS206762 | DVU1320 | 46579731 | -0.938172  | -1.60768   |
| VIMSS206763 | DVU1321 | 46579732 | -1.32422   | -1.30442   |
| VIMSS206764 | DVU1322 | 46579733 | -2.2589    | -4.11023   |
| VIMSS206765 | DVU1323 | 46579734 | -1.51176   | -1.929     |
| VIMSS206766 | DVU1324 | 46579735 | -0.52882   | -0.945901  |
| VIMSS206767 | DVU1325 | 46579736 | -1.26819   | -1.58649   |
| VIMSS206768 | DVU1326 | 46579737 | -1.05141   | -1.57727   |
| VIMSS206769 | DVU1327 | 46579738 | -1.98906   | -2.15192   |
| VIMSS206770 | DVU1328 | 46579739 | -2.04881   | -2.99946   |
| VIMSS206771 | DVU1329 | 46579740 | -1.80031   | -2.47914   |
| VIMSS206772 | DVU1330 | 46579741 | -1.95894   | -3.25831   |
| VIMSS206773 | DVU1331 | 46579742 | 0.705076   | 0.912398   |
| VIMSS206774 | DVU1332 | 46579743 | -0.315026  | -0.515581  |
| VIMSS206775 | DVU1333 | 46579744 | 0.835387   | 1.25315    |
| VIMSS206776 | DVU1334 | 46579745 | -2.18019   | -4.04302   |
| VIMSS206777 | DVU1335 | 46579746 | -0.348293  | -0.505677  |
| VIMSS206778 | DVU1336 | 46579747 | -1.14111   | -1.86458   |
| VIMSS206779 | DVU1337 | 46579748 | -0.117353  | -0.166835  |
| VIMSS206780 | DVU1338 | 46579749 | 0.693064   | 0.880582   |
| VIMSS206781 | DVU1339 | 46579750 | 1.58008    | 2.43293    |
| VIMSS206782 | DVU1340 | 46579751 | 0.67       | 1.08083    |
| VIMSS206783 | DVU1341 | 46579752 | 0.149367   | 0.221264   |
| VIMSS206784 | DVU1342 | 46579753 | 0.87376    | 1.31836    |
| VIMSS206785 | DVU1343 | 46579754 | -0.0405512 | -0.0623581 |
| VIMSS206786 |         |          | -0.0343508 | -0.0590911 |
| VIMSS206787 | DVU1345 | 46579756 | -1.35545   | -1.67992   |
| VIMSS206788 | DVU1346 | 46579757 | -1.02813   | -1.54272   |
| VIMSS206789 | DVU1347 | 46579758 | -0.794365  | -0.96874   |
| VIMSS206790 | DVU1348 | 46579759 | -1.18759   | -1.54854   |
| VIMSS206791 | DVU1349 | 46579760 | -0.61196   | -0.945246  |
| VIMSS206792 | DVU1350 | 46579761 | -0.512909  | -0.82187   |
| VIMSS206793 | DVU1351 | 46579762 | -0.925676  | -1.1797    |
| VIMSS206794 | DVU1352 | 46579763 | -0.553657  | -1.05987   |

|             |         |          |            |            |
|-------------|---------|----------|------------|------------|
| VIMSS206795 | DVU1353 | 46579764 | -0.617623  | -0.787387  |
| VIMSS206797 | DVU1355 | 46579766 | 0.188212   | 0.313318   |
| VIMSS206798 | DVU1356 | 46579767 | 0.0808425  | 0.118737   |
| VIMSS206799 | DVU1357 | 46579768 | -0.442654  | -0.595278  |
| VIMSS206800 |         |          | 1.54801    | 2.91766    |
| VIMSS206801 |         |          | 0.128969   | 0.160691   |
| VIMSS206802 | DVU1360 | 46579771 | 0.598447   | 1.02171    |
| VIMSS206803 | DVU1361 | 46579772 | -1.03792   | -1.17802   |
| VIMSS206804 | DVU1362 | 46579773 | -0.183682  | -0.289557  |
| VIMSS206805 | DVU1363 | 46579774 | 0.329771   | 0.431401   |
| VIMSS206806 | DVU1364 | 46579775 | 0.646218   | 1.22724    |
| VIMSS206807 | DVU1365 | 46579776 | 0.301546   | 0.410345   |
| VIMSS206808 | DVU1366 | 46579777 | -0.142179  | -0.219618  |
| VIMSS206809 | DVU1368 | 46579779 | -0.453595  | -0.665377  |
| VIMSS206810 | DVU1367 | 46579778 | 3.42097    | 3.42792    |
| VIMSS206811 | DVU1369 | 46579780 | -0.139625  | -0.202191  |
| VIMSS206812 | DVU1370 | 46579781 | 0.0457581  | 0.0710821  |
| VIMSS206813 | DVU1371 | 46579782 | -0.865047  | -1.20887   |
| VIMSS206814 | DVU1372 | 46579783 | 0.468848   | 0.804171   |
| VIMSS206815 | DVU1373 | 46579784 | -0.654064  | -0.844652  |
| VIMSS206816 | DVU1374 | 46579785 | 0.93086    | 1.56848    |
| VIMSS206817 | DVU1375 | 46579786 | 0.727941   | 0.988663   |
| VIMSS206818 | DVU1376 | 46579787 | 1.34561    | 2.35544    |
| VIMSS206819 | DVU1377 | 46579788 | -0.248443  | -0.329617  |
| VIMSS206820 | DVU1378 | 46579789 | -1.33764   | -2.02442   |
| VIMSS206822 | DVU1380 | 46579791 | -0.169595  | -0.282916  |
| VIMSS206823 | DVU1381 | 46579792 | -1.55257   | -2.01241   |
| VIMSS206827 | DVU1384 | 46579795 | 1.05539    | 1.45965    |
| VIMSS206829 | DVU1386 | 46579797 | -0.727657  | -0.762395  |
| VIMSS206830 | DVU1387 | 46579798 | -0.671595  | -1.16416   |
| VIMSS206831 | DVU1388 | 46579799 | 2.2806     | 2.90448    |
| VIMSS206832 | DVU1389 | 46579800 | 0.0626956  | 0.0998252  |
| VIMSS206833 | DVU1390 | 46579801 | -0.515145  | -0.696192  |
| VIMSS206835 |         |          | 0.299291   | 0.385793   |
| VIMSS206836 |         |          | -1.13063   | -1.2793    |
| VIMSS206837 | DVU1394 | 46579805 | -2.4453    | -2.94252   |
| VIMSS206838 | DVU1395 | 46579806 | -1.85249   | -2.35224   |
| VIMSS206840 | DVU1397 | 46579808 | 2.04929    | 3.18679    |
| VIMSS206843 | DVU1400 | 46579811 | -0.332723  | -0.434378  |
| VIMSS206844 | DVU1401 | 46579812 | 0.16864    | 0.257135   |
| VIMSS206845 | DVU1402 | 46579813 | 0.343027   | 0.479905   |
| VIMSS206846 | DVU1403 | 46579814 | 0.639087   | 0.882603   |
| VIMSS206847 | DVU1404 | 46579815 | 0.382461   | 0.505614   |
| VIMSS206848 | DVU1405 | 46579816 | -0.14197   | -0.258237  |
| VIMSS206849 | DVU1406 | 46579817 | -0.934791  | -1.41806   |
|             |         |          | -          | -          |
| VIMSS206850 | DVU1408 | 46579819 | 0.00595591 | 0.00628639 |
| VIMSS206851 | DVU1409 | 46579820 | -0.0257172 | -0.0314104 |
| VIMSS206852 | DVU1407 | 46579818 | 0.480165   | 0.735145   |

|             |         |           |            |            |
|-------------|---------|-----------|------------|------------|
| VIMSS206853 | DVU1410 | 46579821  | 0.654141   | 0.83228    |
| VIMSS206854 | DVU1411 | 46579822  | -2.6399    | -3.82119   |
| VIMSS206855 | DVU1412 | 46579823  | 0.315298   | 0.41836    |
| VIMSS206856 | DVU1413 | 46579824  | -0.969177  | -1.40918   |
| VIMSS206857 | DVU1414 | 46579825  | -0.157946  | -0.204744  |
| VIMSS206859 | DVU1416 | 46579827  | -0.0330132 | -0.0295656 |
| VIMSS206861 | DVU1418 | 46579829  | -0.16855   | -0.272802  |
| VIMSS206862 | DVU1419 | 46579830  | 0.236624   | 0.373425   |
| VIMSS206863 | DVU1420 | 46579831  | 0.672465   | 0.92968    |
| VIMSS206865 | DVU1421 | 46579832  | 0.242044   | 0.42008    |
| VIMSS206866 | DVU1422 | 46579833  | 0.844212   | 1.26489    |
| VIMSS206867 | DVU1423 | 46579834  | 1.23552    | 2.12752    |
| VIMSS206868 | DVU1424 | 46579835  | -0.62793   | -0.954382  |
| VIMSS206869 | DVU1425 | 46579836  | 0.408285   | 0.735769   |
| VIMSS206870 | DVU1426 | 46579837  | 0.415394   | 0.535547   |
| VIMSS206871 | DVU1427 | 46579838  | -0.557298  | -1.00097   |
| VIMSS206872 | DVU1428 | 46579839  | 0.908959   | 1.5294     |
| VIMSS206873 | DVU1429 | 46579840  | -0.130374  | -0.123205  |
| VIMSS206874 | DVU1430 | 46579841  | 1.12218    | 1.94462    |
| VIMSS206875 | DVU1431 | 46579842  | 1.28666    | 2.19411    |
| VIMSS206876 | DVU1432 | 46579843  | -0.169955  | -0.301051  |
|             |         |           | -          |            |
| VIMSS206878 | DVU1434 | 46579845  | 0.00753034 | -0.0126262 |
| VIMSS206879 | DVU1435 | 46579846  | -0.0842199 | -0.0967417 |
| VIMSS206880 | DVU1436 | 46579847  | 1.26041    | 2.20814    |
| VIMSS206882 | DVU1438 | 46579849  | 1.12961    | 1.98357    |
| VIMSS206884 | DVU1440 | 46579851  | 0.317084   | 0.483434   |
| VIMSS206885 | DVU1441 | 46579852  | 0.880385   | 1.33021    |
| VIMSS206886 | DVU1442 | 46579853  | 1.53263    | 2.30628    |
| VIMSS206887 | DVU1443 | 46579854  | -0.330329  | -0.47439   |
| VIMSS206888 | DVU1444 | 46579855  | -0.905834  | -1.05192   |
| VIMSS206889 | DVU1445 | 46579856  | -0.731606  | -1.05837   |
| VIMSS206890 | DVU1446 | 46579857  | 0.169219   | 0.184879   |
| VIMSS206891 | DVU1447 | 46579858  | 0.534175   | 0.854422   |
| VIMSS206892 | DVU1448 | 46579859  | 0.816811   | 1.28777    |
| VIMSS206893 | DVU1449 | 46579860  | 1.55967    | 2.82413    |
| VIMSS206894 | DVU1450 | 46579861  | 0.568515   | 0.94313    |
| VIMSS206895 | DVU1451 | 46579862  | 0.292478   | 0.47511    |
| VIMSS206896 | DVU1452 | 46579863  | -0.0958067 | -0.142486  |
| VIMSS206897 | DVU1453 | 46579864  | -0.689406  | -1.06322   |
| VIMSS206898 | DVU1454 | 46579865  | -2.04018   | -3.25646   |
| VIMSS206899 | DVU1455 | 46579866  | -1.37143   | -1.98404   |
| VIMSS206901 | DVU1457 | 46579868  | 1.09882    | 1.80925    |
| VIMSS206902 | DVU1458 | 304569698 | 0.857218   | 1.30326    |
| VIMSS206904 | DVU1459 | 46579870  | -0.190865  | -0.220067  |
| VIMSS206905 | DVU1460 | 46579871  | 0.720414   | 1.24812    |
| VIMSS206906 | DVU1461 | 46579872  | 0.0629285  | 0.100964   |
| VIMSS206907 | DVU1462 | 46579873  | 1.33433    | 1.81168    |
| VIMSS206908 | DVU1463 | 46579874  | 0.734408   | 1.15681    |

|             |         |           |            |            |
|-------------|---------|-----------|------------|------------|
| VIMSS206909 | DVU1464 | 46579875  | 1.0405     | 1.38678    |
| VIMSS206910 | DVU1465 | 304569699 | 0.176436   | 0.209233   |
| VIMSS206911 | DVU1466 | 46579877  | -0.148325  | -0.263439  |
| VIMSS206912 | DVU1467 | 46579878  | -0.442406  | -0.664225  |
| VIMSS206913 | DVU1468 | 46579879  | -0.0387633 | -0.0620053 |
| VIMSS206914 | DVU1469 | 46579880  | -0.372824  | -0.513498  |
| VIMSS206915 | DVU1470 | 46579881  | 0.741992   | 1.34576    |
| VIMSS206916 | DVU1471 | 304569700 | 1.79628    | 2.89044    |
| VIMSS206917 | DVU1472 |           | 1.21386    | 2.23612    |
| VIMSS206920 | DVU1474 | 46579885  | 1.61151    | 2.39542    |
| VIMSS206921 | DVU1475 | 46579886  | 0.981328   | 1.62798    |
| VIMSS206922 | DVU1476 | 46579887  | 0.124752   | 0.116099   |
| VIMSS206927 | DVU1479 | 46579890  | -0.0375413 | -0.0585754 |
| VIMSS206928 | DVU1480 | 46579891  | 0.976613   | 1.24277    |
| VIMSS206931 | DVU1483 | 46579894  | -0.482123  | -0.657441  |
| VIMSS206932 | DVU1484 | 46579895  | 0.574456   | 0.894022   |
| VIMSS206935 | DVU1488 | 46579899  | 0.808023   | 0.879942   |
| VIMSS206936 | DVU1489 | 46579900  | 1.52991    | 1.89502    |
| VIMSS206938 | DVU1491 | 46579902  | 0.843694   | 1.33803    |
| VIMSS206941 | DVU1494 | 46579905  | 0.609446   | 0.715416   |
| VIMSS206944 | DVU1499 | 46579910  | 0.326734   | 0.31157    |
| VIMSS206945 | DVU1500 | 46579911  | 1.21402    | 1.57407    |
| VIMSS206947 | DVU1501 | 46579912  | 1.20955    | 1.6447     |
| VIMSS206948 | DVU1502 | 46579913  | 1.2388     | 1.43081    |
| VIMSS206949 | DVU1503 | 46579914  | 1.39289    | 1.5055     |
| VIMSS206950 | DVU1504 | 46579915  | 0.0615128  | 0.0638519  |
| VIMSS206951 | DVU1505 | 46579916  | 1.56958    | 1.89304    |
| VIMSS206952 | DVU1506 | 46579917  | 1.42274    | 1.70543    |
| VIMSS206953 | DVU1507 | 46579918  | 0.320819   | 0.397349   |
| VIMSS206954 | DVU1508 | 46579919  | 1.32634    | 1.54472    |
| VIMSS206956 | DVU1509 | 46579920  | -1.28888   | -1.98095   |
| VIMSS206960 | DVU1513 | 46579924  | 0.101442   | 0.0936838  |
| VIMSS206961 | DVU1514 | 46579925  | 1.03339    | 1.22363    |
| VIMSS206962 | DVU1515 | 46579926  | 1.13033    | 1.08835    |
| VIMSS206963 | DVU1516 | 46579927  | 0.267656   | 0.371236   |
| VIMSS206964 | DVU1517 | 46579928  | 1.62327    | 1.97949    |
| VIMSS206965 | DVU1518 | 46579929  | 0.230748   | 0.305475   |
| VIMSS206969 | DVU1520 | 46579931  | -1.28842   | -1.85258   |
| VIMSS206970 | DVU1521 | 46579932  | 0.207536   | 0.332907   |
| VIMSS206971 | DVU1522 | 46579933  | -0.109448  | -0.102852  |
| VIMSS206972 | DVU1523 | 46579934  | 1.1906     | 1.69134    |
| VIMSS206973 | DVU1524 | 46579935  | 1.48671    | 1.86508    |
| VIMSS206974 | DVU1525 | 46579936  | 0.0358001  | 0.0292303  |
| VIMSS206975 | DVU1527 | 46579938  | 0.760956   | 0.922742   |
| VIMSS206976 | DVU1528 | 46579939  | 1.42083    | 2.07607    |
| VIMSS206977 | DVU1529 | 46579940  | 0.945999   | 1.62269    |
| VIMSS206978 | DVU1530 | 46579941  | -1.40269   | -2.03866   |
| VIMSS206979 | DVU1531 | 46579942  | -0.189392  | -0.301106  |
| VIMSS206980 | DVU1532 | 46579943  | 0.529126   | 0.83727    |



|             |         |          |            |            |
|-------------|---------|----------|------------|------------|
| VIMSS206981 | DVU1533 | 46579944 | -0.0422539 | -0.0558755 |
| VIMSS206982 | DVU1534 | 46579945 | 2.22239    | 2.7023     |
| VIMSS206983 | DVU1535 | 46579946 | 1.88834    | 3.02961    |
| VIMSS206984 | DVU1536 | 46579947 | 0.995775   | 1.19427    |
| VIMSS206985 | DVU1537 | 46579948 | -0.388177  | -0.684524  |
| VIMSS206986 | DVU1538 | 46579949 | -1.3231    | -1.71468   |
| VIMSS206988 | DVU1540 | 46579951 | -1.37563   | -1.82532   |
| VIMSS206989 | DVU1541 | 46579952 | 1.44772    | 2.45162    |
| VIMSS206990 | DVU1542 | 46579953 | -0.636264  | -0.884936  |
| VIMSS206991 | DVU1543 | 46579954 | 0.699913   | 1.15366    |
| VIMSS206992 |         |          | 1.11057    | 1.5245     |
| VIMSS206993 | DVU1545 | 46579956 | 1.4632     | 1.97826    |
| VIMSS206995 | DVU1547 | 46579958 | 0.527014   | 0.870465   |
| VIMSS206996 | DVU1548 | 46579959 | -1.82802   | -2.42666   |
| VIMSS206997 | DVU1549 | 46579960 | 1.41492    | 2.3672     |
| VIMSS206998 | DVU1550 | 46579961 | 0.25683    | 0.298427   |
| VIMSS206999 | DVU1551 | 46579962 | -0.134354  | -0.222335  |
| VIMSS207000 | DVU1552 | 46579963 | 0.809115   | 1.0555     |
| VIMSS207001 | DVU1553 | 46579964 | 0.469923   | 0.624121   |
| VIMSS207002 | DVU1554 | 46579965 | 0.948537   | 1.14458    |
| VIMSS207003 | DVU1555 | 46579966 | 1.90598    | 3.00379    |
| VIMSS207004 | DVU1556 | 46579967 | 1.86481    | 2.27131    |
| VIMSS207006 | DVU1558 | 46579969 | 1.84163    | 2.1118     |
| VIMSS207007 | DVU1559 | 46579970 | 1.22899    | 1.92493    |
| VIMSS207008 | DVU1560 | 46579971 | 0.665102   | 0.73649    |
| VIMSS207010 | DVU1561 | 46579972 | 0.968538   | 1.26237    |
| VIMSS207011 | DVU1562 | 46579973 | 0.479714   | 0.576002   |
| VIMSS207012 | DVU1563 | 46579974 | 1.3784     | 1.59595    |
| VIMSS207016 |         |          | -0.653593  | -0.93878   |
| VIMSS207018 | DVU1568 | 46579979 | -0.234336  | -0.319296  |
| VIMSS207019 | DVU1569 | 46579980 | 0.178791   | 0.245697   |
| VIMSS207020 | DVU1570 | 46579981 | 0.765152   | 1.07166    |
| VIMSS207021 |         |          | -1.44938   | -1.87289   |
| VIMSS207022 | DVU1572 | 46579983 | 1.39667    | 2.58474    |
| VIMSS207023 | DVU1573 | 46579984 | -1.46272   | -1.80649   |
| VIMSS207024 | DVU1574 | 46579985 | -2.12504   | -2.79848   |
| VIMSS207025 | DVU1575 | 46579986 | -2.48725   | -3.20599   |
| VIMSS207026 | DVU1576 | 46579987 | -0.151293  | -0.226659  |
| VIMSS207028 | DVU1577 | 46579988 | 0.776374   | 1.29726    |
| VIMSS207029 | DVU1578 | 46579989 | 0.119189   | 0.164631   |
| VIMSS207030 | DVU1579 | 46579990 | -0.0146713 | -0.0257481 |
| VIMSS207031 | DVU1580 | 46579991 | -0.308505  | -0.376803  |
| VIMSS207032 | DVU1581 | 46579992 | 0.155725   | 0.250368   |
| VIMSS207033 | DVU1582 | 46579993 | -0.6079    | -0.792921  |
| VIMSS207034 | DVU1583 | 46579994 | -0.392868  | -0.557049  |
| VIMSS207035 | DVU1584 | 46579995 | -0.989724  | -1.22433   |
| VIMSS207036 | DVU1585 | 46579996 | -0.0213061 | -0.0274001 |
| VIMSS207037 | DVU1586 | 46579997 | -0.160518  | -0.18521   |
| VIMSS207038 | DVU1587 | 46579998 | -0.972663  | -1.66746   |

|             |         |           |            |            |
|-------------|---------|-----------|------------|------------|
| VIMSS207040 | DVU1589 | 46580000  | -0.0419745 | -0.0695262 |
| VIMSS207041 | DVU1590 | 46580001  | 0.382756   | 0.491921   |
| VIMSS207042 | DVU1591 | 46580002  | 1.35772    | 1.64541    |
| VIMSS207043 | DVU1592 | 46580003  | 0.966718   | 1.55324    |
| VIMSS207044 | DVU1593 | 46580004  | 1.23322    | 2.23442    |
| VIMSS207045 | DVU1594 | 46580005  | 1.45177    | 2.28097    |
| VIMSS207046 | DVU1595 | 304569703 | 0.844359   | 1.17045    |
| VIMSS207047 | DVU1596 | 46580007  | 1.19156    | 1.85619    |
| VIMSS207048 | DVU1597 | 46580008  | 1.17888    | 1.58811    |
| VIMSS207050 | DVU1599 | 46580010  | 0.332142   | 0.439278   |
| VIMSS207051 | DVU1600 | 46580011  | 0.723733   | 1.24786    |
| VIMSS207052 | DVU1601 | 46580012  | 1.20912    | 1.80144    |
| VIMSS207054 | DVU1603 | 46580014  | 1.64764    | 2.48379    |
| VIMSS207055 |         |           | -1.49064   | -1.74165   |
| VIMSS207056 | DVU1605 | 46580016  | 0.59099    | 0.811976   |
| VIMSS207057 | DVU1606 | 46580017  | 0.114228   | 0.143275   |
| VIMSS207058 | DVU1607 | 46580018  | 0.518104   | 0.930912   |
| VIMSS207059 | DVU1608 | 46580019  | -1.10975   | -1.18037   |
| VIMSS207060 | DVU1609 | 46580020  | -0.473112  | -0.780743  |
| VIMSS207061 | DVU1610 | 46580021  | -0.415333  | -0.36555   |
| VIMSS207062 | DVU1611 | 46580022  | 0.465544   | 0.774751   |
| VIMSS207063 | DVU1612 | 46580023  | -0.470508  | -0.603358  |
| VIMSS207064 | DVU1613 | 304569704 | -0.350254  | -0.591284  |
| VIMSS207065 | DVU1614 | 46580025  | -0.311925  | -0.397103  |
| VIMSS207067 | DVU1615 | 46580026  | -1.1727    | -1.47381   |
| VIMSS207068 | DVU1617 | 46580028  | -0.390428  | -0.675687  |
| VIMSS207069 | DVU1618 | 46580029  | -1.35986   | -1.84457   |
| VIMSS207070 | DVU1619 | 46580030  | -0.491874  | -0.871842  |
| VIMSS207071 | DVU1620 | 46580031  | 1.11489    | 1.82873    |
| VIMSS207072 | DVU1621 | 46580032  | -0.347509  | -0.532359  |
| VIMSS207073 | DVU1622 | 46580033  | -0.976319  | -1.27871   |
| VIMSS207074 | DVU1623 | 46580034  | -0.897088  | -1.38447   |
| VIMSS207075 | DVU1624 | 46580035  | -0.0348715 | -0.0531344 |
| VIMSS207076 | DVU1625 | 46580036  | 0.0625843  | 0.101511   |
| VIMSS207077 | DVU1626 | 46580037  | -0.926568  | -1.68115   |
| VIMSS207079 | DVU1627 | 46580038  | -0.702689  | -1.12429   |
| VIMSS207080 | DVU1628 | 46580039  | -0.0616097 | -0.0996969 |
| VIMSS207081 | DVU1629 | 46580040  | 1.06578    | 1.86778    |
| VIMSS207082 | DVU1630 | 46580041  | -0.609018  | -1.0983    |
| VIMSS207083 | DVU1631 | 46580042  | -0.571276  | -0.910456  |
| VIMSS207084 | DVU1632 | 46580043  | -0.741061  | -1.18458   |
| VIMSS207085 | DVU1633 | 46580044  | -0.855345  | -1.28272   |
| VIMSS207086 | DVU1634 | 46580045  | -0.106406  | -0.174609  |
| VIMSS207087 | DVU1635 | 46580046  | -1.63366   | -2.27754   |
| VIMSS207088 | DVU1636 | 46580047  | -0.943045  | -1.22824   |
| VIMSS207090 | DVU1638 | 46580049  | -0.996489  | -1.81764   |
| VIMSS207091 | DVU1639 | 46580050  | -0.243604  | -0.417247  |
| VIMSS207094 | DVU1641 | 46580052  | 0.0449815  | 0.0775968  |
| VIMSS207100 | DVU1644 | 46580054  | 0.172655   | 0.24837    |

|             |         |           |           |           |
|-------------|---------|-----------|-----------|-----------|
| VIMSS207101 | DVU1645 | 46580055  | -1.09876  | -1.82349  |
| VIMSS207104 | DVU1646 | 46580056  | -0.700761 | -1.00703  |
| VIMSS207105 | DVU1647 | 46580057  | 1.33943   | 2.53606   |
| VIMSS207106 | DVU1648 | 46580058  | 0.0462937 | 0.0809489 |
| VIMSS207107 | DVU1649 | 46580059  | 1.11334   | 1.97001   |
| VIMSS207109 | DVU1650 | 46580060  | 0.21196   | 0.350714  |
| VIMSS207110 | DVU1651 | 46580061  | 0.796006  | 1.29663   |
| VIMSS207111 | DVU1652 | 46580062  | -0.17347  | -0.292349 |
| VIMSS207114 | DVU1655 | 46580065  | 0.36533   | 0.661061  |
| VIMSS207115 | DVU1656 | 46580066  | 1.73402   | 2.71248   |
| VIMSS207116 | DVU1657 | 46580067  | -0.592231 | -1.06321  |
| VIMSS207117 | DVU1658 | 46580068  | 0.545604  | 0.794428  |
| VIMSS207119 | DVU1660 | 46580070  | -0.251    | -0.392683 |
| VIMSS207120 | DVU1661 | 46580071  | -0.821231 | -1.22164  |
| VIMSS207121 | DVU1662 | 46580072  | -0.727749 | -1.02237  |
| VIMSS207122 | DVU1663 | 46580073  | -1.09195  | -1.1998   |
| VIMSS207123 | DVU1664 | 46580074  | -1.1006   | -1.86154  |
| VIMSS207124 | DVU1665 | 46580075  | -1.67509  | -2.40641  |
| VIMSS207125 | DVU1666 | 46580076  | -1.29027  | -2.12458  |
| VIMSS207126 | DVU1667 | 46580077  | 0.394138  | 0.709744  |
| VIMSS207127 | DVU1668 | 46580078  | 0.149683  | 0.233539  |
| VIMSS207128 | DVU1669 | 304569705 | -0.133449 | -0.207911 |
| VIMSS207129 | DVU1670 | 46580080  | -0.899401 | -1.48609  |
| VIMSS207130 | DVU1671 | 46580081  | -1.04477  | -1.47129  |
| VIMSS207131 | DVU1672 | 46580082  | -0.476125 | -0.813698 |
| VIMSS207132 | DVU1673 | 304569706 | -0.444195 | -0.515209 |
| VIMSS207133 | DVU1674 | 46580084  | 0.17589   | 0.316694  |
| VIMSS207134 | DVU1675 | 46580085  | 1.44887   | 2.54598   |
| VIMSS207135 | DVU1676 | 46580086  | -1.53192  | -2.42548  |
| VIMSS207136 | DVU1677 | 46580087  | 0.189426  | 0.331532  |
| VIMSS207137 | DVU1678 | 46580088  | -0.660866 | -0.96127  |
| VIMSS207138 | DVU1679 | 46580089  | -0.167502 | -0.271916 |
| VIMSS207139 | DVU1680 | 46580090  | 0.108449  | 0.160889  |
| VIMSS207140 | DVU1681 | 46580091  | 0.422182  | 0.756807  |
| VIMSS207141 | DVU1682 | 46580092  | -0.293567 | -0.423354 |
| VIMSS207142 | DVU1683 | 46580093  | -0.196527 | -0.258225 |
| VIMSS207143 | DVU1684 | 304569707 | 0.661936  | 1.07938   |
| VIMSS207144 | DVU1685 | 46580095  | 0.672755  | 1.25406   |
| VIMSS207145 | DVU1686 | 46580096  | 0.443947  | 0.753175  |
| VIMSS207146 | DVU1687 | 46580097  | 0.0357945 | 0.0415412 |
| VIMSS207147 | DVU1688 | 46580098  | -1.39108  | -2.48684  |
| VIMSS207149 | DVU1690 | 46580100  | -1.32049  | -2.37847  |
| VIMSS207151 | DVU1692 | 46580102  | 0.520038  | 0.815426  |
| VIMSS207152 | DVU1693 | 46580103  | -1.36579  | -2.33614  |
| VIMSS207153 | DVU1694 | 46580104  | 0.543799  | 0.719139  |
| VIMSS207154 | DVU1695 | 46580105  | 1.38165   | 1.85584   |
| VIMSS207155 | DVU1696 | 46580106  | 1.19528   | 1.10262   |
| VIMSS207156 |         |           | 1.28638   | 1.92181   |
| VIMSS207157 | DVU1698 | 46580108  | 1.06881   | 1.08366   |

|             |         |           |           |           |
|-------------|---------|-----------|-----------|-----------|
| VIMSS207159 | DVU1699 | 46580109  | -0.260228 | -0.46452  |
| VIMSS207161 | DVU1701 | 46580111  | -0.551604 | -0.739105 |
| VIMSS207163 | DVU1703 | 46580113  | 0.0849996 | 0.143752  |
| VIMSS207165 | DVU1705 | 304569708 | -1.27655  | -2.05319  |
| VIMSS207166 | DVU1707 | 46580117  | -0.149857 | -0.210828 |
| VIMSS207167 | DVU1708 | 46580118  | -0.303411 | -0.431334 |
| VIMSS207168 | DVU1709 | 46580119  | 0.305938  | 0.471495  |
| VIMSS207171 |         |           | -0.659243 | -1.23833  |
| VIMSS207173 | DVU1713 | 46580123  | 1.51332   | 1.59219   |
| VIMSS207174 | DVU1714 | 46580124  | 0.604514  | 0.82434   |
| VIMSS207175 | DVU1715 | 46580125  | 0.146601  | 0.159689  |
| VIMSS207176 | DVU1716 | 46580126  | 1.47008   | 1.75471   |
| VIMSS207177 | DVU1717 | 46580127  | 1.41669   | 2.33653   |
| VIMSS207178 | DVU1718 | 46580128  | 1.30507   | 1.51697   |
| VIMSS207179 | DVU1719 | 46580129  | -0.217546 | -0.204468 |
| VIMSS207180 | DVU1720 | 46580130  | 2.13451   | 2.15804   |
| VIMSS207181 | DVU1721 | 46580131  | 1.01399   | 1.37409   |
| VIMSS207183 | DVU1723 | 46580133  | 3.20381   | 3.03988   |
| VIMSS207184 | DVU1724 | 46580134  | 2.19338   | 2.25105   |
| VIMSS207185 | DVU1725 | 46580135  | -0.284595 | -0.356888 |
| VIMSS207186 | DVU1727 | 46580137  | 1.93543   | 1.80744   |
| VIMSS207187 | DVU1726 | 46580136  | 0.799808  | 1.10904   |
| VIMSS207188 | DVU1728 | 46580138  | 0.254266  | 0.332447  |
| VIMSS207189 | DVU1729 | 46580139  | 0.740059  | 1.00825   |
| VIMSS207190 | DVU1730 | 46580140  | 1.1044    | 1.58666   |
| VIMSS207191 | DVU1731 | 46580141  | -0.567256 | -0.544372 |
| VIMSS207197 | DVU1736 | 46580146  | 0.255096  | 0.252243  |
| VIMSS207198 | DVU1737 | 46580147  | -0.435575 | -0.673362 |
| VIMSS207199 | DVU1738 | 46580148  | 1.009     | 0.954613  |
| VIMSS207201 | DVU1740 | 46580150  | 2.4604    | 2.97038   |
| VIMSS207202 | DVU1741 | 46580151  | 1.23417   | 1.60289   |
| VIMSS207203 | DVU1742 | 46580152  | -1.51677  | -1.65811  |
| VIMSS207204 | DVU1743 | 46580153  | 0.572613  | 0.563869  |
| VIMSS207205 | DVU1744 | 46580154  | -1.29946  | -1.30556  |
| VIMSS207208 | DVU1746 | 46580156  | -1.04745  | -1.51327  |
| VIMSS207213 | DVU1750 | 46580160  | -0.542419 | -0.627579 |
| VIMSS207214 | DVU1751 | 46580161  | -1.55649  | -1.67407  |
| VIMSS207216 | DVU1752 | 46580162  | 0.449303  | 0.478399  |
| VIMSS207217 | DVU1753 | 46580163  | 0.518303  | 0.661912  |
| VIMSS207218 | DVU1754 | 46580164  | 0.672901  | 0.798291  |
| VIMSS207221 | DVU1756 | 46580166  | -1.84746  | -2.45591  |
| VIMSS207223 | DVU1758 | 46580168  | -0.407721 | -0.644425 |
| VIMSS207224 | DVU1759 | 46580169  | -0.270632 | -0.317132 |
| VIMSS207225 | DVU1760 | 46580170  | 0.808187  | 1.00703   |
| VIMSS207227 | DVU1762 | 46580172  | 1.07528   | 1.53039   |
| VIMSS207229 | DVU1764 | 46580174  | -1.35196  | -2.4262   |
| VIMSS207230 | DVU1765 | 46580175  | -1.59366  | -1.96549  |
| VIMSS207231 | DVU1766 | 46580176  | 0.761945  | 0.723039  |
| VIMSS207232 | DVU1767 | 46580177  | 0.209469  | 0.267139  |

|             |         |           |            |            |
|-------------|---------|-----------|------------|------------|
| VIMSS207233 | DVU1768 | 46580178  | 0.263155   | 0.328805   |
| VIMSS207234 | DVU1769 | 46580179  | -0.896163  | -1.12159   |
| VIMSS207235 | DVU1770 | 46580180  | 0.750601   | 0.820842   |
| VIMSS207236 | DVU1771 | 46580181  | 0.570751   | 0.882544   |
| VIMSS207237 | DVU1772 | 46580182  | 0.339776   | 0.558114   |
| VIMSS207239 | DVU1774 | 46580184  | 0.273471   | 0.413266   |
| VIMSS207240 | DVU1775 | 46580185  | -0.793752  | -1.12239   |
| VIMSS207241 | DVU1776 | 46580186  | -0.763094  | -0.853011  |
| VIMSS207242 | DVU1777 | 46580187  | -2.01732   | -2.23352   |
| VIMSS207243 | DVU1778 | 46580188  | 0.881261   | 1.31318    |
| VIMSS207244 | DVU1779 | 46580189  | 1.27314    | 1.73782    |
| VIMSS207245 | DVU1780 | 46580190  | 0.943873   | 1.50804    |
| VIMSS207246 | DVU1781 | 46580191  | 2.21201    | 3.46087    |
| VIMSS207247 | DVU1782 | 46580192  | 2.26418    | 3.39602    |
| VIMSS207248 | DVU1783 | 46580193  | 1.80743    | 2.55223    |
| VIMSS207249 | DVU1784 | 46580194  | 0.209332   | 0.381854   |
| VIMSS207250 | DVU1785 | 46580195  | -0.370397  | -0.357909  |
| VIMSS207251 | DVU1786 | 46580196  | 1.07939    | 1.92212    |
| VIMSS207252 | DVU1787 | 46580197  | -0.991714  | -1.59419   |
| VIMSS207253 | DVU1788 | 46580198  | -0.630924  | -1.1029    |
| VIMSS207254 | DVU1789 | 46580199  | -1.37643   | -1.66769   |
| VIMSS207256 | DVU1791 | 46580201  | -0.936594  | -1.33114   |
| VIMSS207257 | DVU1792 | 161343883 | -1.81553   | -2.92231   |
| VIMSS207259 | DVU1794 | 46580204  | 1.99208    | 3.56503    |
| VIMSS207260 | DVU1795 | 46580205  | -0.122852  | -0.188861  |
| VIMSS207262 |         |           | -0.198896  | -0.259621  |
| VIMSS207263 | DVU1798 | 46580208  | 0.725163   | 1.28659    |
| VIMSS207264 | DVU1799 | 46580209  | -0.0133271 | -0.0194051 |
| VIMSS207266 | DVU1801 | 46580211  | 0.239728   | 0.33664    |
| VIMSS207267 | DVU1802 | 46580212  | 1.28871    | 1.43874    |
| VIMSS207268 | DVU1803 | 46580213  | 0.474353   | 0.647917   |
| VIMSS207269 |         |           | 1.559      | 1.79949    |
| VIMSS207270 | DVU1805 | 46580215  | 0.254923   | 0.361644   |
| VIMSS207271 | DVU1806 | 46580216  | 0.0708907  | 0.0943595  |
| VIMSS207272 | DVU1807 | 46580217  | -0.623756  | -0.640085  |
| VIMSS207273 | DVU1808 | 46580218  | -0.659634  | -0.983712  |
| VIMSS207274 | DVU1809 | 46580219  | 0.356134   | 0.51535    |
| VIMSS207275 | DVU1810 | 46580220  | 0.671754   | 0.887022   |
| VIMSS207276 | DVU1811 | 46580221  | 2.21365    | 2.87396    |
| VIMSS207277 | DVU1812 | 46580222  | 1.79114    | 2.64207    |
| VIMSS207278 | DVU1813 | 46580223  | 0.762393   | 1.0423     |
| VIMSS207279 | DVU1814 | 46580224  | 1.3106     | 2.17391    |
| VIMSS207281 |         |           | 1.17994    | 1.75793    |
| VIMSS207282 | DVU1817 | 46580227  | 3.32953    | 4.02432    |
| VIMSS207283 | DVU1818 | 46580228  | -0.668335  | -1.15821   |
| VIMSS207284 | DVU1819 | 46580229  | -1.11777   | -1.88076   |
| VIMSS207285 | DVU1820 | 46580230  | 0.656457   | 0.885663   |
| VIMSS207286 | DVU1821 | 46580231  | 0.507004   | 0.568444   |
| VIMSS207287 | DVU1822 | 46580232  | 0.0697221  | 0.122352   |

|             |         |           |            |            |
|-------------|---------|-----------|------------|------------|
| VIMSS207288 | DVU1823 | 46580233  | 0.21994    | 0.324228   |
| VIMSS207289 | DVU1824 | 46580234  | 2.12636    | 2.55586    |
| VIMSS207290 | DVU1825 | 46580235  | 0.176127   | 0.327005   |
| VIMSS207291 | DVU1826 | 46580236  | -2.31009   | -3.3142    |
| VIMSS207292 | DVU1827 | 46580237  | -0.772429  | -1.42905   |
| VIMSS207293 | DVU1828 | 46580238  | -2.01788   | -1.95023   |
| VIMSS207295 | DVU1830 | 46580240  | 0.78067    | 1.25836    |
| VIMSS207297 | DVU1832 | 46580241  | -0.780159  | -1.2485    |
| VIMSS207298 | DVU1833 | 46580242  | -0.936568  | -1.67253   |
| VIMSS207299 | DVU1834 | 304569711 | 0.019593   | 0.0301832  |
| VIMSS207300 | DVU1835 |           | -0.282858  | -0.457782  |
| VIMSS207302 | DVU1836 | 46580245  | 0.0199262  | 0.026064   |
| VIMSS207303 | DVU1837 | 46580246  | -0.920914  | -1.29773   |
| VIMSS207304 | DVU1838 | 46580247  | 0.379251   | 0.703342   |
| VIMSS207305 | DVU1839 | 46580248  | 1.17029    | 1.91437    |
| VIMSS207306 | DVU1840 | 46580249  | -1.06474   | -1.81063   |
| VIMSS207307 | DVU1841 | 46580250  | -1.01256   | -1.47353   |
| VIMSS207308 | DVU1842 | 46580251  | 0.163284   | 0.292282   |
| VIMSS207309 | DVU1843 | 46580252  | 0.0950536  | 0.149543   |
| VIMSS207310 | DVU1844 | 46580253  | 0.930683   | 1.47096    |
| VIMSS207311 | DVU1845 | 46580254  | 0.483595   | 0.708709   |
| VIMSS207312 | DVU1846 | 46580255  | 0.827226   | 1.26786    |
| VIMSS207313 | DVU1847 | 46580256  | -0.271137  | -0.434184  |
| VIMSS207314 | DVU1848 | 46580257  | -0.982842  | -1.54469   |
| VIMSS207315 | DVU1849 | 46580258  | -0.642162  | -0.944575  |
| VIMSS207316 | DVU1850 | 46580259  | 0.636433   | 1.05223    |
| VIMSS207317 | DVU1851 | 46580260  | 0.0555183  | 0.0938515  |
| VIMSS207318 | DVU1853 | 46580262  | 0.819621   | 1.17772    |
| VIMSS207319 | DVU1854 | 46580263  | 0.28066    | 0.370678   |
| VIMSS207321 | DVU1855 | 46580264  | 0.936879   | 1.25096    |
| VIMSS207323 | DVU1857 | 46580266  | 0.748553   | 1.08428    |
| VIMSS207324 | DVU1858 | 46580267  | 5.11825    | 7.32522    |
| VIMSS207325 | DVU1859 | 46580268  | -0.494012  | -0.578108  |
| VIMSS207326 | DVU1860 | 46580269  | -0.595127  | -1.04387   |
| VIMSS207327 | DVU1861 | 46580270  | 0.339023   | 0.611392   |
| VIMSS207328 | DVU1862 | 46580271  | 0.871763   | 1.57049    |
| VIMSS207329 | DVU1863 | 46580272  | -0.0441485 | -0.0674063 |
| VIMSS207331 | DVU1865 | 46580274  | -0.935626  | -1.36851   |
| VIMSS207332 | DVU1866 | 46580275  | -0.112476  | -0.197094  |
| VIMSS207333 | DVU1867 | 46580276  | 0.906183   | 1.55948    |
| VIMSS207334 | DVU1868 | 46580277  | 0.0671592  | 0.122988   |
| VIMSS207335 | DVU1869 | 46580278  | 0.703561   | 1.14118    |
| VIMSS207336 | DVU1870 | 46580279  | 0.711145   | 1.08303    |
| VIMSS207339 |         |           | -1.21564   | -1.63563   |
| VIMSS207340 | DVU1874 | 46580283  | 0.804003   | 1.35829    |
| VIMSS207341 | DVU1875 | 46580284  | 0.753075   | 1.33021    |
| VIMSS207342 | DVU1876 | 46580285  | 0.315074   | 0.542162   |
| VIMSS207343 | DVU1877 | 46580286  | 0.240893   | 0.388049   |
| VIMSS207347 | DVU1881 | 46580290  | -0.3988    | -0.587859  |

|             |         |          |           |           |
|-------------|---------|----------|-----------|-----------|
| VIMSS207348 | DVU1882 | 46580291 | 0.0582634 | 0.10079   |
| VIMSS207349 | DVU1883 | 46580292 | 0.106858  | 0.169307  |
| VIMSS207350 | DVU1884 | 46580293 | 0.344824  | 0.483697  |
| VIMSS207352 | DVU1886 | 46580295 | -0.366077 | -0.650836 |
| VIMSS207353 | DVU1887 | 46580296 | -0.605855 | -1.05032  |
| VIMSS207354 | DVU1888 | 46580297 | 0.52216   | 0.780476  |
| VIMSS207355 | DVU1889 | 46580298 | -0.963158 | -1.37991  |
| VIMSS207357 | DVU1890 | 46580299 | -0.834404 | -1.33993  |
| VIMSS207358 | DVU1891 | 46580300 | 0.678987  | 1.2889    |
| VIMSS207359 | DVU1892 | 46580301 | 1.28655   | 2.26923   |
| VIMSS207360 | DVU1893 | 46580302 | -1.06813  | -1.50832  |
| VIMSS207361 |         |          | 0.474891  | 0.714159  |
| VIMSS207363 | DVU1895 | 46580304 | -0.101208 | -0.146305 |
| VIMSS207364 | DVU1896 | 46580305 | -2.80788  | -3.59966  |
| VIMSS207366 | DVU1898 | 46580307 | -0.694292 | -1.23026  |
| VIMSS207367 | DVU1899 | 46580308 | 1.5977    | 2.0364    |
| VIMSS207368 | DVU1900 | 46580309 | 0.172821  | 0.305488  |
| VIMSS207369 |         |          | 0.647166  | 1.14224   |
| VIMSS207370 | DVU1902 | 46580311 | -0.474623 | -0.609916 |
| VIMSS207371 | DVU1903 | 46580312 | -1.21374  | -1.5019   |
| VIMSS207372 | DVU1904 | 46580313 | 0.179534  | 0.249924  |
| VIMSS207378 | DVU1909 | 46580318 | 0.851394  | 1.33958   |
| VIMSS207379 | DVU1910 | 46580319 | 1.15302   | 1.67177   |
| VIMSS207380 | DVU1911 | 46580320 | -0.474618 | -0.729898 |
| VIMSS207382 | DVU1913 | 46580322 | -0.892615 | -1.3393   |
| VIMSS207384 | DVU1915 | 46580324 | -0.652898 | -0.974582 |
| VIMSS207385 | DVU1916 | 46580325 | -1.25138  | -1.44054  |
| VIMSS207386 | DVU1917 | 46580326 | 1.26175   | 1.94586   |
| VIMSS207388 | DVU1919 | 46580328 | -0.288726 | -0.440452 |
| VIMSS207390 | DVU1921 | 46580330 | 1.68218   | 1.937     |
| VIMSS207391 | DVU1922 | 46580331 | 1.2393    | 1.43251   |
| VIMSS207392 | DVU1923 | 46580332 | 0.638412  | 1.17738   |
| VIMSS207393 | DVU1924 | 46580333 | 1.39762   | 1.97312   |
| VIMSS207394 | DVU1925 | 46580334 | 1.43977   | 2.30482   |
| VIMSS207395 | DVU1926 | 46580335 | 0.507833  | 0.65828   |
| VIMSS207397 | DVU1927 | 46580336 | -1.65562  | -2.89439  |
| VIMSS207398 | DVU1928 | 46580337 | -0.448483 | -0.706611 |
| VIMSS207399 | DVU1929 | 46580338 | -1.63553  | -2.40273  |
| VIMSS207400 | DVU1930 | 46580339 | -0.574673 | -0.809647 |
| VIMSS207401 | DVU1931 | 46580340 | -1.31887  | -1.80405  |
| VIMSS207402 | DVU1932 | 46580341 | 0.519214  | 0.656212  |
| VIMSS207403 | DVU1933 | 46580342 | -0.964738 | -1.54653  |
| VIMSS207404 | DVU1934 | 46580343 | -0.505714 | -0.807565 |
| VIMSS207405 | DVU1935 | 46580344 | -1.23274  | -1.70186  |
| VIMSS207406 | DVU1936 | 46580345 | -0.594847 | -1.02404  |
| VIMSS207407 | DVU1937 | 46580346 | 0.476976  | 0.749603  |
| VIMSS207408 | DVU1938 | 46580347 | 0.139538  | 0.226046  |
| VIMSS207409 | DVU1939 | 46580348 | -0.201719 | -0.311745 |
| VIMSS207410 | DVU1940 | 46580349 | 0.383389  | 0.605651  |

|             |         |          |            |            |
|-------------|---------|----------|------------|------------|
| VIMSS207411 | DVU1941 | 46580350 | -0.30347   | -0.343829  |
| VIMSS207412 | DVU1942 | 46580351 | -0.975717  | -1.73801   |
| VIMSS207413 | DVU1943 | 46580352 | 0.737326   | 1.19529    |
| VIMSS207414 | DVU1944 | 46580353 | 2.1626     | 4.10894    |
| VIMSS207415 | DVU1945 | 46580354 | 1.95683    | 3.01577    |
| VIMSS207416 | DVU1946 | 46580355 | 1.58358    | 2.82504    |
| VIMSS207417 | DVU1947 | 46580356 | 0.199236   | 0.29872    |
| VIMSS207418 | DVU1948 | 46580357 | -1.66796   | -2.57499   |
| VIMSS207419 | DVU1949 | 46580358 | -1.15429   | -1.45892   |
| VIMSS207420 | DVU1950 | 46580359 | -0.447256  | -0.703816  |
| VIMSS207421 | DVU1951 | 46580360 | -1.07857   | -1.41513   |
| VIMSS207422 | DVU1952 | 46580361 | -0.0910193 | -0.144528  |
| VIMSS207423 | DVU1953 | 46580362 | -0.422113  | -0.590628  |
| VIMSS207424 | DVU1954 | 46580363 | -0.0353983 | -0.0545413 |
| VIMSS207425 | DVU1955 | 46580364 | -0.594008  | -0.813555  |
| VIMSS207426 | DVU1956 | 46580365 | 0.296455   | 0.468687   |
| VIMSS207428 | DVU1958 | 46580367 | 1.11412    | 1.48048    |
| VIMSS207430 | DVU1960 | 46580369 | -0.595247  | -0.794601  |
| VIMSS207431 | DVU1961 | 46580370 | 0.0528653  | 0.0687789  |
| VIMSS207437 | DVU1967 | 46580376 | -0.369691  | -0.519931  |
| VIMSS207438 | DVU1968 | 46580377 | 0.428574   | 0.426298   |
| VIMSS207439 | DVU1969 | 46580378 | -0.468922  | -0.567417  |
| VIMSS207440 | DVU1970 | 46580379 | 0.0574892  | 0.0682524  |
| VIMSS207441 | DVU1971 | 46580380 | -1.22004   | -1.79784   |
| VIMSS207444 | DVU1973 | 46580382 | 0.173562   | 0.220008   |
| VIMSS207446 |         |          | -1.64125   | -2.43469   |
| VIMSS207447 | DVU1976 | 46580385 | -1.47767   | -1.93779   |
| VIMSS207448 | DVU1977 | 46580386 | -1.38173   | -2.12805   |
| VIMSS207449 | DVU1978 | 46580387 | -0.634992  | -0.985418  |
| VIMSS207451 | DVU1980 | 46580389 | 1.49642    | 2.71628    |
| VIMSS207452 | DVU1981 | 46580390 | -1.50815   | -1.96564   |
| VIMSS207454 | DVU1983 | 46580392 | 0.0986355  | 0.172121   |
| VIMSS207455 | DVU1984 | 46580393 | 0.420027   | 0.706057   |
| VIMSS207456 | DVU1985 | 46580394 | -1.25496   | -1.28108   |
| VIMSS207458 | DVU1986 | 46580395 | 2.18552    | 3.32854    |
| VIMSS207459 | DVU1987 | 46580396 | -0.772086  | -0.949028  |
| VIMSS207460 | DVU1988 | 46580397 | -0.0746523 | -0.0987065 |
| VIMSS207463 | DVU1991 | 46580400 | 0.115225   | 0.157248   |
| VIMSS207464 | DVU1992 | 46580401 | 0.450143   | 0.792395   |
| VIMSS207465 | DVU1993 | 46580402 | 1.76803    | 2.44746    |
| VIMSS207467 | DVU1995 | 46580404 | -1.07441   | -1.54032   |
| VIMSS207471 | DVU1999 | 46580408 | -0.110138  | -0.165551  |
| VIMSS207472 | DVU2000 | 46580409 | -1.77656   | -2.71817   |
| VIMSS207476 | DVU2003 | 46580411 | 1.00352    | 0.774877   |
| VIMSS207479 | DVU2006 | 46580414 | -1.00496   | -1.52625   |
| VIMSS207480 | DVU2007 | 46580415 | -0.611319  | -0.794753  |
| VIMSS207482 | DVU2009 | 46580417 | -2.72179   | -4.02032   |
| VIMSS207483 | DVU2010 | 46580418 | -1.6209    | -2.68854   |
| VIMSS207485 | DVU2012 | 46580420 | -2.35846   | -3.01315   |



|             |         |          |           |           |
|-------------|---------|----------|-----------|-----------|
| VIMSS207486 | DVU2013 | 46580421 | 1.14941   | 1.48998   |
| VIMSS207487 | DVU2014 | 46580422 | 1.14755   | 1.49684   |
| VIMSS207489 | DVU2016 | 46580424 | -3.64955  | -6.47517  |
| VIMSS207490 | DVU2017 | 46580425 | -0.375249 | -0.623221 |
| VIMSS207492 | DVU2019 | 46580426 | -1.89697  | -2.38212  |
| VIMSS207493 | DVU2020 | 46580427 | -0.840618 | -1.24637  |
| VIMSS207494 | DVU2021 | 46580428 | -2.41108  | -3.37485  |
| VIMSS207496 | DVU2023 | 46580430 | -1.30472  | -1.52169  |
| VIMSS207497 | DVU2024 | 46580431 | -1.22632  | -1.50935  |
| VIMSS207498 | DVU2025 | 46580432 | -2.97491  | -3.91445  |
| VIMSS207499 | DVU2026 | 46580433 | -1.89964  | -3.10009  |
| VIMSS207501 | DVU2028 | 46580435 | -2.61832  | -3.91603  |
| VIMSS207505 | DVU2032 | 46580439 | -5.16044  | -7.30502  |
| VIMSS207506 | DVU2033 | 46580440 | -6.82381  | -10.7965  |
| VIMSS207507 | DVU2034 | 46580441 | -3.04477  | -3.75729  |
| VIMSS207508 | DVU2035 | 46580442 | -0.324489 | -0.476405 |
| VIMSS207509 | DVU2036 | 46580443 | 3.82343   | 4.28634   |
| VIMSS207510 | DVU2037 | 46580444 | -2.74568  | -3.50063  |
| VIMSS207511 | DVU2038 | 46580445 | -5.8065   | -6.81687  |
| VIMSS207512 | DVU2039 | 46580446 | -3.09196  | -3.48461  |
| VIMSS207513 | DVU2040 | 46580447 | -3.76425  | -3.56377  |
| VIMSS207514 | DVU2041 | 46580448 | -3.03902  | -3.85106  |
| VIMSS207515 |         |          | -0.247495 | -0.335854 |
| VIMSS207516 | DVU2043 | 46580450 | -4.27489  | -4.32315  |
| VIMSS207517 | DVU2044 | 46580451 | -4.94354  | -7.48319  |
| VIMSS207518 | DVU2045 | 46580452 | -1.50411  | -1.80152  |
| VIMSS207519 | DVU2046 | 46580453 | -0.789352 | -1.221    |
| VIMSS207521 | DVU2048 | 46580455 | -1.32291  | -2.10485  |
| VIMSS207523 | DVU2049 |          | -2.4156   | -3.21589  |
| VIMSS207524 | DVU2051 | 46580456 | 0.71023   | 0.957156  |
| VIMSS207525 | DVU2052 | 46580457 | -3.58903  | -4.94418  |
| VIMSS207526 | DVU2053 | 46580458 | -2.95182  | -4.16647  |
| VIMSS207527 | DVU2054 | 46580459 | -2.43131  | -3.15145  |
| VIMSS207528 | DVU2055 | 46580460 | -0.140155 | -0.224712 |
| VIMSS207530 | DVU2057 | 46580462 | 0.334512  | 0.449933  |
| VIMSS207531 |         |          | 0.180566  | 0.232967  |
| VIMSS207532 | DVU2059 | 46580464 | 1.82018   | 2.67686   |
| VIMSS207533 | DVU2060 | 46580465 | 2.23138   | 3.13746   |
| VIMSS207534 | DVU2061 | 46580466 | 3.03958   | 3.87857   |
| VIMSS207535 | DVU2062 | 46580467 | -0.439532 | -0.576352 |
| VIMSS207536 | DVU2063 | 46580468 | -0.377403 | -0.479431 |
| VIMSS207537 | DVU2064 | 46580469 | 3.15863   | 5.27313   |
| VIMSS207539 | DVU2066 | 46580471 | -3.64798  | -5.82579  |
| VIMSS207540 | DVU2067 | 46580472 | 0.134403  | 0.154733  |
| VIMSS207541 | DVU2068 | 46580473 | 0.151472  | 0.180377  |
| VIMSS207543 | DVU2069 | 46580474 | 0.0904615 | 0.147735  |
| VIMSS207544 | DVU2070 | 46580475 | 1.8185    | 2.80695   |
| VIMSS207545 | DVU2071 | 46580476 | 0.413407  | 0.446115  |
| VIMSS207547 | DVU2073 | 46580478 | 0.356934  | 0.644756  |

|             |         |           |            |            |
|-------------|---------|-----------|------------|------------|
| VIMSS207548 | DVU2074 | 304569714 | 4.07606    | 5.09069    |
| VIMSS207549 | DVU2075 | 46580480  | 1.34       | 1.97771    |
| VIMSS207550 | DVU2076 | 46580481  | 0.671829   | 0.821267   |
| VIMSS207551 | DVU2077 | 46580482  | 2.08243    | 2.69877    |
| VIMSS207552 | DVU2078 | 46580483  | -2.9135    | -3.47318   |
| VIMSS207553 |         |           | -4.85343   | -7.61706   |
| VIMSS207555 | DVU2081 | 46580486  | -1.00967   | -1.00871   |
| VIMSS207556 | DVU2082 | 46580487  | 3.09117    | 3.90296    |
| VIMSS207558 | DVU2084 | 46580489  | 1.24821    | 2.23048    |
| VIMSS207559 | DVU2085 | 304569715 | 0.821756   | 1.34163    |
| VIMSS207560 | DVU2086 | 46580491  | -2.63799   | -3.72526   |
| VIMSS207561 | DVU2087 | 46580492  | -6.36485   | -6.40006   |
| VIMSS207562 | DVU2088 | 46580493  | -2.47648   | -3.2523    |
| VIMSS207565 | DVU2090 | 46580495  | 1.92524    | 2.02529    |
| VIMSS207566 | DVU2091 | 46580496  | -3.11458   | -5.01229   |
| VIMSS207567 | DVU2092 | 46580497  | 0.156864   | 0.194292   |
| VIMSS207568 | DVU2093 | 46580498  | -0.981972  | -1.38957   |
| VIMSS207570 | DVU2095 | 46580500  | 4.26179    | 4.56254    |
| VIMSS207571 | DVU2096 | 46580501  | -3.61334   | -4.76882   |
| VIMSS207572 | DVU2097 | 46580502  | -2.2646    | -3.68866   |
| VIMSS207573 | DVU2098 | 46580503  | -3.88452   | -5.47876   |
| VIMSS207574 | DVU2099 | 46580504  | 0.469003   | 0.501573   |
| VIMSS207575 | DVU2100 | 46580505  | 6.03432    | 7.80549    |
| VIMSS207577 | DVU2101 | 46580506  | 0.231477   | 0.364327   |
| VIMSS207578 | DVU2102 | 46580507  | 2.17174    | 2.88716    |
| VIMSS207580 | DVU2104 | 46580509  | 5.98646    | 8.79858    |
| VIMSS207581 | DVU2105 | 46580510  | 3.74077    | 4.47071    |
| VIMSS207582 | DVU2106 | 46580511  | -3.39693   | -3.83443   |
| VIMSS207583 |         |           | -1.88034   | -1.89169   |
| VIMSS207584 | DVU2108 | 46580513  | 1.64453    | 2.78614    |
| VIMSS207585 | DVU2109 | 46580514  | 0.415797   | 0.642659   |
| VIMSS207586 | DVU2110 | 46580515  | 0.238955   | 0.281213   |
|             |         |           |            | -          |
| VIMSS207587 | DVU2111 | 46580516  | -0.0069468 | 0.00932018 |
| VIMSS207588 | DVU2112 | 46580517  | 1.12735    | 2.13266    |
| VIMSS207589 | DVU2113 | 46580518  | -1.40199   | -1.54886   |
| VIMSS207590 | DVU2114 | 46580519  | -1.51102   | -2.17749   |
| VIMSS207591 | DVU2115 | 46580520  | 1.50525    | 2.14676    |
| VIMSS207594 | DVU2117 | 46580522  | 0.211697   | 0.169658   |
| VIMSS207595 | DVU2118 | 46580523  | 1.44995    | 1.59466    |
| VIMSS207596 | DVU2119 | 46580524  | 0.646331   | 0.678385   |
| VIMSS207597 | DVU2120 | 46580525  | 0.634078   | 0.742371   |
| VIMSS207598 | DVU2121 | 46580526  | 0.00825943 | 0.00882666 |
| VIMSS207600 | DVU2123 | 46580528  | 1.50052    | 1.85123    |
| VIMSS207601 | DVU2124 | 46580529  | 1.81969    | 2.55298    |
| VIMSS207602 | DVU2125 | 46580530  | 0.910713   | 0.974345   |
| VIMSS207603 | DVU2126 | 46580531  | 1.08877    | 1.03703    |
| VIMSS207604 | DVU2127 | 46580532  | 1.45913    | 1.33183    |
| VIMSS207605 | DVU2128 | 46580533  | 0.324996   | 0.508405   |

|             |         |          |            |            |
|-------------|---------|----------|------------|------------|
| VIMSS207607 | DVU2130 | 46580535 | 1.36176    | 1.78248    |
| VIMSS207608 | DVU2131 | 46580536 | -0.225373  | -0.274097  |
| VIMSS207609 | DVU2132 | 46580537 | 0.961773   | 1.19468    |
| VIMSS207610 | DVU2133 | 46580538 | 0.323468   | 0.44462    |
| VIMSS207612 | DVU2135 | 46580540 | -0.851717  | -0.889599  |
| VIMSS207613 | DVU2136 | 46580541 | 1.06775    | 1.57497    |
| VIMSS207614 | DVU2137 | 46580542 | -0.337474  | -0.326262  |
| VIMSS207615 | DVU2138 | 46580543 | 0.682382   | 1.07171    |
| VIMSS207616 | DVU2139 | 46580544 | -0.0659247 | -0.10952   |
| VIMSS207617 | DVU2140 | 46580545 | 0.901686   | 1.56485    |
| VIMSS207618 | DVU2141 | 46580546 | -0.122629  | -0.209984  |
| VIMSS207619 | DVU2142 | 46580547 | -0.372504  | -0.605664  |
| VIMSS207621 | DVU2144 | 46580549 | -0.364759  | -0.474582  |
| VIMSS207623 | DVU2145 | 46580550 | -0.64009   | -0.734702  |
| VIMSS207625 | DVU2146 | 46580551 | -0.159682  | -0.179349  |
| VIMSS207626 | DVU2147 | 46580552 | 0.509746   | 0.609734   |
| VIMSS207627 | DVU2148 | 46580553 | 0.34859    | 0.514156   |
| VIMSS207628 | DVU2149 | 46580554 | -0.806348  | -1.00805   |
| VIMSS207629 | DVU2150 | 46580555 | -1.91042   | -2.62905   |
| VIMSS207630 | DVU2151 | 46580556 | -0.645991  | -0.700703  |
| VIMSS207631 | DVU2152 | 46580557 | 0.392043   | 0.563145   |
| VIMSS207633 | DVU2154 | 46580559 | 0.903759   | 0.963608   |
| VIMSS207634 | DVU2155 | 46580560 | 2.21606    | 2.83135    |
| VIMSS207635 | DVU2156 | 46580561 | 1.08641    | 1.20684    |
| VIMSS207636 | DVU2157 | 46580562 | 1.42794    | 2.14153    |
| VIMSS207640 | DVU2160 | 46580565 | 1.44183    | 2.01275    |
| VIMSS207644 | DVU2164 | 46580569 | 1.77953    | 2.85882    |
| VIMSS207645 | DVU2165 | 46580570 | 1.64547    | 1.71074    |
| VIMSS207646 | DVU2166 | 46580571 | 0.830068   | 1.04174    |
| VIMSS207648 | DVU2168 | 46580573 | -0.271013  | -0.289113  |
| VIMSS207651 | DVU2171 | 46580576 | 1.35627    | 1.1855     |
| VIMSS207652 | DVU2172 | 46580577 | 1.16586    | 1.02642    |
| VIMSS207653 | DVU2173 | 46580578 | -0.0198471 | -0.0180879 |
| VIMSS207656 | DVU2175 | 46580580 | -2.40331   | -3.06474   |
| VIMSS207658 | DVU2176 | 46580581 | -0.472131  | -0.586017  |
| VIMSS207659 | DVU2177 | 46580582 | -0.840506  | -1.1784    |
| VIMSS207663 | DVU2180 | 46580585 | 0.689058   | 0.851743   |
| VIMSS207664 | DVU2181 | 46580586 | 0.53582    | 0.761959   |
| VIMSS207668 | DVU2184 | 46580589 | 0.129669   | 0.140368   |
| VIMSS207669 | DVU2185 | 46580590 | -0.482573  | -0.509895  |
| VIMSS207671 | DVU2187 | 46580592 | 0.388063   | 0.366071   |
| VIMSS207672 | DVU2188 | 46580593 | 0.173722   | 0.280384   |
| VIMSS207673 | DVU2189 | 46580594 | 0.00149008 | 0.00237036 |
| VIMSS207674 | DVU2190 | 46580595 | 0.833864   | 1.13595    |
| VIMSS207675 | DVU2191 | 46580596 | 1.25625    | 1.70765    |
| VIMSS207676 | DVU2192 | 46580597 | 1.21684    | 1.48561    |
| VIMSS207677 | DVU2193 | 46580598 | 0.28062    | 0.392835   |
| VIMSS207678 | DVU2194 | 46580599 | 2.46329    | 2.66912    |
| VIMSS207679 | DVU2195 | 46580600 | 1.7929     | 2.85332    |

|             |         |          |           |           |
|-------------|---------|----------|-----------|-----------|
| VIMSS207680 | DVU2196 | 46580601 | 0.423774  | 0.489285  |
| VIMSS207681 | DVU2197 | 46580602 | 0.558224  | 0.732709  |
| VIMSS207682 | DVU2198 | 46580603 | -0.809659 | -1.09929  |
| VIMSS207684 | DVU2200 | 46580605 | -0.897173 | -1.43119  |
| VIMSS207686 | DVU2202 | 46580607 | 1.42598   | 1.8561    |
| VIMSS207687 | DVU2203 | 46580608 | -1.15201  | -1.52714  |
| VIMSS207688 | DVU2204 | 46580609 | 0.573929  | 0.754289  |
| VIMSS207689 | DVU2205 | 46580610 | -2.26879  | -2.00896  |
| VIMSS207690 | DVU2206 | 46580611 | -0.505416 | -0.659022 |
| VIMSS207692 | DVU2208 | 46580613 | -0.622543 | -0.873809 |
| VIMSS207693 | DVU2209 | 46580614 | -0.829934 | -1.21246  |
| VIMSS207694 | DVU2210 | 46580615 | -0.971334 | -1.54229  |
| VIMSS207695 | DVU2211 | 46580616 | 0.278139  | 0.427985  |
| VIMSS207696 | DVU2212 | 46580617 | 1.04109   | 1.87128   |
| VIMSS207697 | DVU2213 | 46580618 | -0.152949 | -0.219839 |
| VIMSS207698 | DVU2214 | 46580619 | -0.448272 | -0.525626 |
| VIMSS207699 | DVU2215 | 46580620 | -1.42937  | -2.47885  |
| VIMSS207700 | DVU2216 | 46580621 | -0.115296 | -0.214233 |
| VIMSS207701 | DVU2217 | 46580622 | -0.333927 | -0.379749 |
| VIMSS207702 | DVU2218 | 46580623 | 0.890862  | 1.07543   |
| VIMSS207704 | DVU2220 | 46580625 | -1.12878  | -1.94456  |
| VIMSS207705 | DVU2221 | 46580626 | -0.786478 | -1.32423  |
| VIMSS207706 | DVU2222 | 46580627 | -1.10275  | -1.47522  |
| VIMSS207707 | DVU2223 | 46580628 | -1.75196  | -2.86468  |
| VIMSS207708 | DVU2224 | 46580629 | -0.161544 | -0.204419 |
| VIMSS207709 | DVU2225 | 46580630 | -0.86019  | -1.29486  |
| VIMSS207710 | DVU2226 | 46580631 | -1.6679   | -2.38042  |
| VIMSS207711 | DVU2227 | 46580632 | 0.198324  | 0.317768  |
| VIMSS207712 | DVU2228 | 46580633 | 0.79248   | 1.39497   |
| VIMSS207713 | DVU2229 | 46580634 | 0.772469  | 1.15908   |
| VIMSS207714 | DVU2230 | 46580635 | 0.014971  | 0.0215923 |
| VIMSS207715 | DVU2231 | 46580636 | -1.36192  | -2.24673  |
| VIMSS207716 | DVU2232 | 46580637 | 1.62386   | 2.61481   |
| VIMSS207717 | DVU2233 | 46580638 | 0.353897  | 0.600477  |
| VIMSS207718 | DVU2234 | 46580639 | -0.163567 | -0.214661 |
| VIMSS207719 | DVU2235 | 46580640 | 0.461705  | 0.901683  |
| VIMSS207720 | DVU2236 | 46580641 | 0.759894  | 1.44159   |
| VIMSS207721 | DVU2237 | 46580642 | 0.0265498 | 0.0380348 |
| VIMSS207722 | DVU2238 | 46580643 | 0.735704  | 1.22473   |
| VIMSS207723 | DVU2239 | 46580644 | 1.25579   | 1.53448   |
| VIMSS207724 | DVU2240 | 46580645 | 0.451872  | 0.854435  |
| VIMSS207725 | DVU2241 | 46580646 | -1.25846  | -1.74631  |
| VIMSS207726 | DVU2242 | 46580647 | 1.23095   | 2.00704   |
| VIMSS207727 | DVU2243 | 46580648 | -0.533625 | -0.738554 |
| VIMSS207728 | DVU2244 | 46580649 | 1.69704   | 3.01507   |
| VIMSS207729 | DVU2245 | 46580650 | 1.35295   | 2.11158   |
| VIMSS207731 | DVU2246 | 46580651 | -0.578347 | -0.934408 |
| VIMSS207732 | DVU2247 | 46580652 | 1.80297   | 1.468     |
| VIMSS207735 | DVU2250 | 46580655 | -0.118853 | -0.163023 |

|             |         |           |            |            |
|-------------|---------|-----------|------------|------------|
| VIMSS207736 | DVU2251 | 46580656  | -0.0154691 | -0.02732   |
| VIMSS207737 | DVU2252 | 46580657  | -1.18029   | -1.39329   |
| VIMSS207738 | DVU2253 | 46580658  | -0.592196  | -0.561252  |
| VIMSS207739 | DVU2254 | 46580659  | -0.66179   | -1.08988   |
| VIMSS207740 | DVU2255 | 46580660  | 0.0868558  | 0.150541   |
| VIMSS207741 | DVU2256 | 46580661  | 0.433947   | 0.745804   |
| VIMSS207742 | DVU2257 | 46580662  | -2.84263   | -3.46563   |
| VIMSS207743 | DVU2258 | 46580663  | -0.972104  | -1.75139   |
| VIMSS207744 | DVU2259 | 46580664  | -1.94732   | -2.59912   |
| VIMSS207745 | DVU2260 | 46580665  | -0.874433  | -1.37247   |
| VIMSS207746 | DVU2261 | 46580666  | -0.870284  | -1.43718   |
| VIMSS207748 | DVU2263 | 46580668  | -0.904184  | -1.39418   |
| VIMSS207749 | DVU2264 | 46580669  | 0.00201797 | 0.00350168 |
| VIMSS207752 | DVU2267 | 46580672  | -0.953501  | -1.40508   |
| VIMSS207753 | DVU2268 | 46580673  | 1.21395    | 1.88715    |
| VIMSS207754 | DVU2269 | 46580674  | -0.528518  | -0.828872  |
| VIMSS207755 | DVU2270 | 46580675  | -0.149899  | -0.244159  |
| VIMSS207756 | DVU2271 | 46580676  | 0.415828   | 0.495723   |
| VIMSS207757 | DVU2272 | 46580677  | 0.416949   | 0.566278   |
| VIMSS207759 | DVU2274 | 46580679  | -1.20019   | -1.78706   |
| VIMSS207760 | DVU2275 | 46580680  | -1.68734   | -2.34503   |
| VIMSS207761 | DVU2276 | 46580681  | -0.783371  | -0.77168   |
| VIMSS207762 | DVU2277 | 46580682  | -0.282065  | -0.398483  |
| VIMSS207763 | DVU2278 | 46580683  | 1.43357    | 1.77846    |
| VIMSS207765 | DVU2279 | 46580684  | -1.99319   | -2.69935   |
| VIMSS207766 | DVU2280 | 46580685  | -1.19415   | -1.60186   |
| VIMSS207767 | DVU2281 | 46580686  | 1.69432    | 2.36381    |
| VIMSS207768 | DVU2282 | 46580687  | 0.993101   | 1.50302    |
| VIMSS207769 | DVU2283 | 46580688  | 2.56798    | 3.44967    |
| VIMSS207770 | DVU2284 | 46580689  | -0.602315  | -1.01997   |
| VIMSS207771 | DVU2285 | 46580690  | -3.14846   | -4.08882   |
| VIMSS207772 | DVU2286 | 46580691  | -4.29717   | -7.59023   |
| VIMSS207775 | DVU2288 | 46580693  | -3.67906   | -4.57511   |
| VIMSS207776 | DVU2289 | 46580694  | -3.00242   | -4.41625   |
| VIMSS207777 | DVU2290 | 304569716 | -3.12489   | -5.17495   |
| VIMSS207778 | DVU2291 | 46580696  | -3.12795   | -4.45281   |
| VIMSS207779 | DVU2292 | 46580697  | -1.97458   | -3.31529   |
| VIMSS207780 | DVU2293 | 46580698  | -1.98468   | -3.35959   |
| VIMSS207781 | DVU2294 | 46580699  | -1.52123   | -2.06546   |
| VIMSS207782 | DVU2295 | 46580700  | -0.12671   | -0.175051  |
| VIMSS207783 | DVU2296 | 46580701  | -0.457928  | -0.728993  |
| VIMSS207784 | DVU2297 | 46580702  | 1.61465    | 2.55037    |
| VIMSS207785 | DVU2298 | 46580703  | 0.899527   | 1.63717    |
| VIMSS207786 | DVU2299 | 46580704  | 0.787492   | 1.25443    |
| VIMSS207787 | DVU2300 | 46580705  | -0.807637  | -0.638731  |
| VIMSS207788 | DVU2301 | 46580706  | -1.26414   | -1.32284   |
| VIMSS207789 | DVU2302 | 46580707  | 1.28234    | 1.6188     |
| VIMSS207790 | DVU2303 | 46580708  | 0.284382   | 0.520452   |
| VIMSS207792 | DVU2305 | 46580710  | -1.89172   | -2.3079    |

|             |         |           |            |           |
|-------------|---------|-----------|------------|-----------|
| VIMSS207793 | DVU2306 | 46580711  | -1.54325   | -1.80138  |
| VIMSS207794 | DVU2307 | 46580712  | 1.19747    | 1.95547   |
| VIMSS207795 | DVU2308 | 46580713  | 0.969134   | 1.50016   |
| VIMSS207796 | DVU2309 | 46580714  | 1.68034    | 3.11078   |
| VIMSS207797 | DVU2310 | 46580715  | -0.434516  | -0.498125 |
| VIMSS207799 | DVU2312 | 46580717  | 1.09305    | 1.52386   |
| VIMSS207800 | DVU2313 | 46580718  | 0.787365   | 1.22827   |
| VIMSS207802 | DVU2315 | 46580720  | -0.103435  | -0.176456 |
| VIMSS207803 | DVU2316 | 46580721  | -0.843005  | -0.956282 |
| VIMSS207804 | DVU2317 | 46580722  | -0.134804  | -0.172637 |
| VIMSS207805 | DVU2318 | 46580723  | -1.1007    | -1.02349  |
| VIMSS207806 |         |           | 0.661279   | 0.954362  |
| VIMSS207807 | DVU2320 | 46580725  | -0.0789811 | -0.134307 |
| VIMSS207809 | DVU2322 | 46580727  | 0.0830494  | 0.117314  |
| VIMSS207810 | DVU2323 | 46580728  | 0.0120877  | 0.0201371 |
| VIMSS207811 | DVU2324 | 46580729  | 1.07602    | 1.39003   |
| VIMSS207812 | DVU2325 | 46580730  | 0.479876   | 0.739173  |
| VIMSS207813 | DVU2326 | 46580731  | -0.511473  | -0.680625 |
| VIMSS207815 | DVU2328 | 46580733  | -1.05748   | -1.46007  |
| VIMSS207816 | DVU2329 | 46580734  | -0.234018  | -0.396224 |
| VIMSS207817 | DVU2330 | 46580735  | -0.0400634 | -0.063411 |
| VIMSS207818 | DVU2331 | 46580736  | -0.223589  | -0.388565 |
| VIMSS207819 | DVU2332 | 46580737  | -0.430508  | -0.549446 |
| VIMSS207820 | DVU2333 | 46580738  | -1.08531   | -1.47031  |
| VIMSS207822 | DVU2335 | 46580740  | -1.46087   | -2.15297  |
| VIMSS207823 | DVU2336 | 46580741  | 0.78531    | 0.911215  |
| VIMSS207824 | DVU2337 | 46580742  | 0.155918   | 0.25534   |
| VIMSS207825 | DVU2338 | 46580743  | 0.593599   | 0.871939  |
| VIMSS207826 | DVU2339 | 46580744  | -0.700268  | -1.21656  |
| VIMSS207827 | DVU2340 | 46580745  | 0.147232   | 0.189595  |
| VIMSS207828 | DVU2341 | 46580746  | 0.67446    | 1.11689   |
| VIMSS207829 | DVU2342 | 46580747  | 1.56458    | 2.18181   |
| VIMSS207830 | DVU2343 | 46580748  | 0.113966   | 0.166909  |
| VIMSS207833 | DVU2345 | 46580750  | 3.40065    | 4.73432   |
| VIMSS207835 | DVU2347 | 46580752  | 0.155696   | 0.258359  |
| VIMSS207836 |         |           | -0.382197  | -0.530139 |
| VIMSS207837 | DVU2349 | 46580754  | 2.46434    | 3.90338   |
| VIMSS207838 | DVU2350 | 46580755  | 0.404434   | 0.591595  |
| VIMSS207839 | DVU2351 | 46580756  | 0.834314   | 1.33244   |
| VIMSS207840 | DVU2352 | 46580757  | 0.467366   | 0.746988  |
| VIMSS207841 |         |           | 0.757916   | 1.17827   |
| VIMSS207842 | DVU2354 | 46580759  | 0.0602012  | 0.101457  |
| VIMSS207843 | DVU2355 | 46580760  | -0.83723   | -1.29261  |
| VIMSS207844 | DVU2356 | 46580761  | 0.518236   | 0.626203  |
| VIMSS207845 | DVU2357 | 304569717 | 1.68424    | 2.56697   |
| VIMSS207847 | DVU2359 | 46580764  | 0.754245   | 1.08481   |
| VIMSS207848 | DVU2360 | 46580765  | 0.720501   | 1.0846    |
| VIMSS207850 | DVU2363 | 46580768  | 0.0659596  | 0.111561  |
| VIMSS207851 | DVU2362 | 46580767  | -0.0692306 | -0.084884 |

|             |         |           |            |            |
|-------------|---------|-----------|------------|------------|
| VIMSS207852 | DVU2364 | 46580769  | -1.2391    | -1.93861   |
| VIMSS207853 | DVU2365 | 46580770  | -0.678401  | -0.809815  |
| VIMSS207855 | DVU2367 | 46580772  | -1.23518   | -1.68179   |
| VIMSS207856 | DVU2368 | 46580773  | -0.258796  | -0.448755  |
| VIMSS207857 | DVU2369 | 46580774  | -0.227776  | -0.329254  |
| VIMSS207858 | DVU2370 | 46580775  | -0.107092  | -0.167638  |
| VIMSS207859 | DVU2371 | 46580776  | -0.706188  | -1.0463    |
| VIMSS207860 | DVU2372 | 46580777  | 0.972086   | 1.4368     |
| VIMSS207861 |         |           | -1.30727   | -2.30062   |
| VIMSS207862 | DVU2374 | 46580779  | -1.38122   | -2.21237   |
| VIMSS207863 | DVU2375 | 46580780  | -1.14436   | -1.73343   |
| VIMSS207864 |         |           | -2.20322   | -3.25285   |
| VIMSS207865 | DVU2377 | 46580782  | -1.16708   | -1.69216   |
| VIMSS207866 | DVU2378 | 46580783  | -0.224632  | -0.21908   |
| VIMSS207867 | DVU2379 | 46580784  | 0.55855    | 0.818166   |
| VIMSS207868 | DVU2380 | 46580785  | 0.826914   | 1.02686    |
| VIMSS207869 | DVU2381 | 46580786  | -1.0395    | -1.2705    |
| VIMSS207870 | DVU2382 | 46580787  | -0.0305908 | -0.0314438 |
| VIMSS207871 | DVU2383 | 46580788  | -0.58208   | -0.676089  |
| VIMSS207872 | DVU2384 | 46580789  | 2.59973    | 4.36881    |
| VIMSS207873 | DVU2385 | 46580790  | -0.19501   | -0.196074  |
| VIMSS207874 | DVU2386 | 46580791  | 0.542285   | 0.888383   |
| VIMSS207875 | DVU2387 | 46580792  | 2.67844    | 2.89534    |
| VIMSS207876 | DVU2388 | 46580793  | 0.39753    | 0.562157   |
| VIMSS207877 | DVU2389 | 46580794  | -0.310496  | -0.419194  |
| VIMSS207879 | DVU2390 | 46580795  | 0.378505   | 0.584685   |
| VIMSS207881 | DVU2391 | 46580796  | -1.97037   | -1.40556   |
| VIMSS207883 | DVU2392 | 46580797  | -0.129254  | -0.22117   |
| VIMSS207885 | DVU2394 | 46580799  | 0.596131   | 0.857418   |
| VIMSS207886 | DVU2395 | 304569720 | 1.45445    | 2.24839    |
| VIMSS207887 | DVU2396 | 46580801  | 0.669995   | 1.1318     |
| VIMSS207888 | DVU2397 | 46580802  | 2.58466    | 3.92572    |
| VIMSS207889 | DVU2398 | 46580803  | 2.19868    | 3.32882    |
| VIMSS207890 | DVU2399 | 304569721 | 2.18538    | 3.30732    |
| VIMSS207891 | DVU2400 | 46580805  | 0.840699   | 1.28036    |
| VIMSS207892 | DVU2401 | 46580806  | 2.15765    | 3.39038    |
| VIMSS207893 | DVU2402 | 46580807  | 1.64843    | 2.76698    |
| VIMSS207894 | DVU2403 | 46580808  | 1.57325    | 2.37838    |
| VIMSS207895 | DVU2404 | 46580809  | 1.90847    | 3.5234     |
| VIMSS207898 | DVU2407 | 46580812  | -1.05719   | -1.22915   |
| VIMSS207899 | DVU2408 | 46580813  | 0.880319   | 1.12217    |
| VIMSS207900 | DVU2409 | 46580814  | 0.077186   | 0.122144   |
| VIMSS207901 |         |           | 2.45278    | 3.11767    |
| VIMSS207902 | DVU2411 | 46580816  | 1.55415    | 2.32247    |
| VIMSS207903 |         |           | -0.376435  | -0.543872  |
| VIMSS207904 | DVU2413 | 46580818  | -0.203241  | -0.343142  |
| VIMSS207905 | DVU2414 | 46580819  | 1.20391    | 1.42976    |
| VIMSS207907 | DVU2416 | 46580821  | 1.25991    | 1.93942    |
| VIMSS207908 | DVU2417 | 46580822  | 0.940536   | 1.57579    |

|             |         |           |           |           |
|-------------|---------|-----------|-----------|-----------|
| VIMSS207909 | DVU2418 | 46580823  | 0.0870414 | 0.112373  |
| VIMSS207910 | DVU2419 | 46580824  | 0.954852  | 1.39998   |
| VIMSS207911 | DVU2420 | 46580825  | 0.605346  | 1.12594   |
| VIMSS207912 | DVU2421 | 46580826  | 2.03841   | 2.98893   |
| VIMSS207913 | DVU2422 | 46580827  | 2.17857   | 3.54771   |
| VIMSS207915 | DVU2423 | 46580828  | 2.1496    | 3.54799   |
| VIMSS207916 | DVU2424 | 46580829  | 2.01803   | 3.39354   |
| VIMSS207917 | DVU2425 | 46580830  | -0.262267 | -0.442668 |
| VIMSS207919 | DVU2427 | 46580832  | 2.2222    | 3.44024   |
| VIMSS207920 | DVU2428 | 46580833  | -0.907493 | -1.51678  |
| VIMSS207921 | DVU2429 | 46580834  | -0.573652 | -0.846203 |
| VIMSS207923 | DVU2431 | 46580836  | -0.405947 | -0.589331 |
| VIMSS207924 | DVU2432 | 46580837  | 0.690435  | 1.07174   |
| VIMSS207926 | DVU2434 | 46580839  | -2.46094  | -2.8374   |
| VIMSS207927 |         |           | 0.611631  | 0.954989  |
| VIMSS207928 | DVU2436 | 46580841  | -0.781495 | -1.06555  |
| VIMSS207929 | DVU2437 | 46580842  | -0.10909  | -0.126528 |
| VIMSS207932 | DVU2439 | 46580843  | 1.82042   | 2.81979   |
| VIMSS207933 | DVU2440 | 46580844  | 0.0540948 | 0.0758305 |
| VIMSS207934 | DVU2441 | 46580845  | 1.33386   | 1.96999   |
| VIMSS207935 | DVU2442 | 46580846  | 2.39753   | 3.64101   |
| VIMSS207936 | DVU2443 | 46580847  | 0.485463  | 0.681933  |
| VIMSS207937 | DVU2444 | 46580848  | 3.4523    | 5.12585   |
| VIMSS207939 | DVU2446 | 46580850  | 1.0107    | 1.71752   |
| VIMSS207940 | DVU2447 | 46580851  | 0.574503  | 0.8594    |
| VIMSS207941 | DVU2448 | 46580852  | -0.613545 | -0.908666 |
| VIMSS207942 | DVU2449 | 46580853  | 0.288958  | 0.457401  |
| VIMSS207943 | DVU2450 | 46580854  | 1.64086   | 2.62454   |
| VIMSS207944 | DVU2451 | 46580855  | 0.596451  | 0.812724  |
| VIMSS207946 | DVU2454 | 46580858  | -0.351541 | -0.273796 |
| VIMSS207948 | DVU2455 | 46580859  | 0.637627  | 0.833372  |
| VIMSS207953 | DVU2459 | 304569723 | 1.09213   | 1.5622    |
| VIMSS207954 | DVU2460 | 46580864  | -0.318016 | -0.369212 |
| VIMSS207955 | DVU2461 | 46580865  | -0.302065 | -0.325127 |
| VIMSS207956 | DVU2462 | 46580866  | -0.374229 | -0.402916 |
| VIMSS207957 | DVU2463 | 46580867  | -0.390844 | -0.559456 |
| VIMSS207958 | DVU2464 | 46580868  | -0.141438 | -0.222693 |
| VIMSS207960 | DVU2466 | 46580870  | -0.748317 | -0.886525 |
| VIMSS207961 | DVU2467 | 46580871  | 0.450609  | 0.786276  |
| VIMSS207963 | DVU2468 | 46580872  | 1.33003   | 2.01432   |
| VIMSS207964 | DVU2470 | 46580874  | 1.38656   | 2.40488   |
| VIMSS207967 | DVU2472 | 46580876  | 1.14776   | 1.56481   |
| VIMSS207968 | DVU2473 | 46580877  | 0.479687  | 0.67463   |
| VIMSS207969 | DVU2474 | 46580878  | 0.690994  | 1.17725   |
| VIMSS207970 | DVU2475 | 46580879  | 0.209655  | 0.342588  |
| VIMSS207971 | DVU2476 | 46580880  | 1.77556   | 3.12973   |
| VIMSS207972 | DVU2477 | 46580881  | 0.0898145 | 0.119624  |
| VIMSS207973 | DVU2478 | 46580882  | -0.362924 | -0.437528 |
| VIMSS207974 | DVU2479 | 46580883  | 0.279037  | 0.315929  |



|             |         |          |            |            |
|-------------|---------|----------|------------|------------|
| VIMSS207976 | DVU2481 | 46580885 | 1.48956    | 2.38426    |
| VIMSS207980 | DVU2483 | 46580887 | 1.23538    | 1.89396    |
| VIMSS207981 | DVU2484 | 46580888 | 2.063      | 3.33617    |
| VIMSS207982 | DVU2485 | 46580889 | 1.78129    | 2.70161    |
| VIMSS207983 | DVU2486 | 46580890 | 0.56996    | 0.724932   |
| VIMSS207984 | DVU2487 | 46580891 | 0.559142   | 0.902647   |
| VIMSS207986 |         |          | 0.765194   | 1.1211     |
| VIMSS207987 | DVU2490 | 46580894 | 0.963217   | 1.75337    |
| VIMSS207988 | DVU2491 | 46580895 | 0.278176   | 0.423453   |
| VIMSS207989 |         |          | 0.362425   | 0.496766   |
| VIMSS207990 |         |          | -1.13406   | -1.72582   |
| VIMSS207991 | DVU2494 | 46580898 | 1.64668    | 2.22749    |
| VIMSS207992 | DVU2495 | 46580899 | 0.419653   | 0.770227   |
| VIMSS207993 | DVU2496 | 46580900 | 0.837427   | 1.49899    |
| VIMSS207994 | DVU2497 | 46580901 | 1.82929    | 3.44779    |
| VIMSS207995 | DVU2498 | 46580902 | 0.213868   | 0.323859   |
| VIMSS207997 | DVU2500 | 46580904 | -0.822669  | -1.43973   |
| VIMSS207998 | DVU2501 | 46580905 | -1.2276    | -1.73895   |
| VIMSS207999 | DVU2502 | 46580906 | -0.395633  | -0.547984  |
| VIMSS208000 | DVU2503 | 46580907 | -1.0801    | -1.63903   |
| VIMSS208001 | DVU2504 | 46580908 | 0.211023   | 0.31867    |
| VIMSS208002 | DVU2505 | 46580909 | 0.135413   | 0.160741   |
| VIMSS208003 | DVU2506 | 46580910 | -1.0035    | -1.43341   |
| VIMSS208004 | DVU2507 | 46580911 | -0.389888  | -0.514712  |
| VIMSS208005 | DVU2508 | 46580912 | -0.176479  | -0.274349  |
| VIMSS208006 | DVU2509 | 46580913 | -0.0592723 | -0.104039  |
| VIMSS208007 | DVU2510 | 46580914 | -0.415968  | -0.502084  |
| VIMSS208008 | DVU2511 | 46580915 | -0.682866  | -0.982651  |
| VIMSS208009 | DVU2512 | 46580916 | -0.128577  | -0.235606  |
| VIMSS208010 | DVU2513 | 46580917 | -0.327766  | -0.541531  |
|             |         |          | -          | -          |
| VIMSS208011 | DVU2514 | 46580918 | 0.00586853 | 0.00789057 |
| VIMSS208012 | DVU2515 | 46580919 | 1.08516    | 1.43609    |
| VIMSS208013 | DVU2516 | 46580920 | 1.00308    | 1.65669    |
| VIMSS208014 | DVU2517 | 46580921 | 0.0931898  | 0.106087   |
| VIMSS208015 | DVU2518 | 46580922 | -1.4209    | -1.92807   |
| VIMSS208016 | DVU2519 | 46580923 | -1.14136   | -1.38484   |
| VIMSS208018 | DVU2521 | 46580925 | -1.12464   | -1.47325   |
| VIMSS208019 | DVU2522 | 46580926 | -1.25051   | -2.16649   |
| VIMSS208020 | DVU2523 | 46580927 | 1.27449    | 1.98282    |
| VIMSS208021 | DVU2524 | 46580928 | 0.933189   | 1.06609    |
| VIMSS208022 | DVU2525 | 46580929 | -0.483384  | -0.571925  |
| VIMSS208023 | DVU2526 | 46580930 | 0.906162   | 1.10608    |
| VIMSS208024 | DVU2527 | 46580931 | -2.45583   | -3.59661   |
| VIMSS208025 | DVU2528 | 46580932 | -1.71616   | -1.78964   |
| VIMSS208026 | DVU2529 | 46580933 | 0.346957   | 0.504965   |
| VIMSS208027 | DVU2530 | 46580934 | -0.287617  | -0.407438  |
| VIMSS208028 | DVU2531 | 46580935 | -0.314162  | -0.439145  |
| VIMSS208029 | DVU2532 | 46580936 | -0.646842  | -1.12182   |

|             |         |           |            |            |
|-------------|---------|-----------|------------|------------|
| VIMSS208030 | DVU2533 | 46580937  | -1.18963   | -1.88001   |
| VIMSS208031 | DVU2534 | 46580938  | -1.04269   | -1.32265   |
| VIMSS208032 | DVU2535 | 46580939  | -1.43099   | -1.96191   |
| VIMSS208033 | DVU2536 | 46580940  | -0.96441   | -1.66662   |
| VIMSS208034 | DVU2537 | 46580941  | -1.262     | -1.55779   |
| VIMSS208035 | DVU2538 | 46580942  | -0.916064  | -1.21615   |
| VIMSS208037 | DVU2540 | 46580944  | 0.114337   | 0.160244   |
| VIMSS208038 | DVU2541 | 46580945  | -0.411239  | -0.410261  |
| VIMSS208040 | DVU2543 | 304569724 | 2.28828    | 2.62287    |
| VIMSS208041 | DVU2544 | 46580948  | 1.02638    | 1.47693    |
| VIMSS208042 | DVU2545 | 46580949  | -0.0688427 | -0.0917998 |
| VIMSS208043 | DVU2546 | 304569725 | 0.690714   | 1.19726    |
| VIMSS208044 | DVU2547 | 46580951  | 2.10482    | 3.05035    |
| VIMSS208045 | DVU2548 | 46580952  | 1.21537    | 1.82379    |
| VIMSS208046 | DVU2549 | 46580953  | 0.284986   | 0.427787   |
| VIMSS208048 |         |           | 0.993531   | 1.73901    |
| VIMSS208049 | DVU2552 | 46580956  | -0.78934   | -1.28492   |
| VIMSS208050 | DVU2553 | 46580957  | -0.839413  | -1.2986    |
| VIMSS208051 | DVU2554 | 46580958  | 0.12372    | 0.232065   |
| VIMSS208052 | DVU2555 | 46580959  | -0.609882  | -0.970309  |
| VIMSS208053 | DVU2556 | 46580960  | 2.03698    | 3.1633     |
| VIMSS208054 | DVU2557 | 46580961  | 1.80073    | 2.72599    |
| VIMSS208055 | DVU2558 | 46580962  | -3.07338   | -4.1694    |
| VIMSS208056 | DVU2559 | 46580963  | 0.51847    | 0.780769   |
| VIMSS208057 | DVU2560 | 46580964  | -0.200662  | -0.222434  |
| VIMSS208058 | DVU2561 | 46580965  | 0.0240153  | 0.0252258  |
| VIMSS208059 | DVU2562 | 46580966  | -0.735979  | -0.810908  |
| VIMSS208060 | DVU2563 | 46580967  | 0.342042   | 0.345943   |
| VIMSS208061 | DVU2564 | 46580968  | 1.08019    | 1.22176    |
| VIMSS208062 | DVU2565 | 46580969  | -1.38171   | -1.40954   |
| VIMSS208063 | DVU2566 | 46580970  | -1.72135   | -2.06725   |
| VIMSS208064 | DVU2567 | 46580971  | -1.04318   | -1.10385   |
| VIMSS208065 | DVU2568 | 46580972  | -0.496981  | -0.572571  |
| VIMSS208066 | DVU2569 | 46580973  | -0.524001  | -0.932413  |
| VIMSS208067 | DVU2570 | 46580974  | -0.861166  | -1.15836   |
| VIMSS208068 | DVU2571 | 46580975  | 3.18362    | 3.97       |
| VIMSS208069 | DVU2572 | 46580976  | 2.75132    | 3.08257    |
| VIMSS208070 | DVU2573 | 46580977  | 4.11037    | 3.64813    |
| VIMSS208071 | DVU2574 | 46580978  | 3.68627    | 3.05435    |
| VIMSS208072 | DVU2575 | 46580979  | -0.745979  | -1.03547   |
| VIMSS208073 | DVU2576 | 46580980  | -0.505978  | -0.598733  |
| VIMSS208074 | DVU2577 | 46580981  | -0.417107  | -0.537427  |
| VIMSS208077 | DVU2579 | 46580983  | -0.855845  | -1.25105   |
| VIMSS208078 | DVU2580 | 46580984  | -0.12789   | -0.172411  |
| VIMSS208079 | DVU2581 | 46580985  | 0.485491   | 0.559579   |
| VIMSS208080 | DVU2582 | 46580986  | -1.56333   | -1.70589   |
| VIMSS208081 | DVU2583 | 46580987  | 0.587151   | 1.03465    |
| VIMSS208082 | DVU2584 | 46580988  | -1.15257   | -1.41237   |
| VIMSS208083 | DVU2585 | 46580989  | 1.50764    | 2.26682    |

|             |         |          |            |            |
|-------------|---------|----------|------------|------------|
| VIMSS208085 | DVU2586 | 46580990 | -0.77387   | -0.884324  |
| VIMSS208086 | DVU2587 | 46580991 | 0.581584   | 0.800005   |
| VIMSS208087 | DVU2588 | 46580992 | 0.700787   | 0.996268   |
| VIMSS208089 | DVU2590 | 46580994 | 0.783636   | 1.32709    |
| VIMSS208090 | DVU2591 | 46580995 | 0.554888   | 0.974169   |
| VIMSS208091 | DVU2592 | 46580996 | 0.767931   | 0.764307   |
| VIMSS208094 | DVU2595 | 46580999 | 1.24337    | 1.47791    |
| VIMSS208096 | DVU2596 | 46581000 | 2.50175    | 2.86477    |
| VIMSS208097 | DVU2598 | 46581002 | 0.942075   | 1.11185    |
| VIMSS208099 | DVU2600 | 46581004 | 1.62357    | 2.11758    |
| VIMSS208102 | DVU2603 | 46581007 | 0.480281   | 0.677156   |
| VIMSS208103 | DVU2604 | 46581008 | 0.250787   | 0.391357   |
| VIMSS208104 | DVU2605 | 46581009 | 0.929536   | 1.39762    |
| VIMSS208105 | DVU2606 | 46581010 | 0.40232    | 0.53736    |
| VIMSS208106 | DVU2607 | 46581011 | 1.91592    | 3.61345    |
| VIMSS208108 | DVU2609 | 46581013 | 0.16527    | 0.263784   |
| VIMSS208109 | DVU2610 | 46581014 | -0.905164  | -0.843002  |
| VIMSS208111 | DVU2612 | 46581016 | 0.813048   | 1.40052    |
| VIMSS208112 | DVU2613 | 46581017 | 0.330522   | 0.532259   |
| VIMSS208114 | DVU2615 | 46581019 | 2.26757    | 3.53162    |
| VIMSS208115 | DVU2616 | 46581020 | 1.30042    | 1.51535    |
| VIMSS208116 | DVU2617 | 46581021 | -0.182841  | -0.267825  |
| VIMSS208118 | DVU2619 | 46581023 | 0.461762   | 0.611369   |
| VIMSS208119 | DVU2620 | 46581024 | 0.525393   | 0.718276   |
| VIMSS208120 | DVU2621 | 46581025 | -0.723197  | -1.0355    |
| VIMSS208121 | DVU2622 | 46581026 | 1.23081    | 1.95643    |
| VIMSS208122 | DVU2623 | 46581027 | 0.934147   | 1.33243    |
| VIMSS208123 | DVU2624 | 46581028 | 0.539634   | 0.734121   |
| VIMSS208124 | DVU2625 | 46581029 | 0.753685   | 1.1429     |
| VIMSS208125 | DVU2626 | 46581030 | 1.23939    | 1.58346    |
| VIMSS208127 | DVU2628 | 46581032 | 0.0337694  | 0.0533863  |
| VIMSS208128 | DVU2629 | 46581033 | -0.115603  | -0.151548  |
| VIMSS208129 | DVU2630 | 46581034 | 1.30533    | 2.06483    |
| VIMSS208130 | DVU2631 | 46581035 | 0.768622   | 1.05227    |
| VIMSS208132 |         |          | -2.78716   | -3.19388   |
| VIMSS208133 | DVU2634 | 46581038 | 0.795698   | 0.908644   |
| VIMSS208134 | DVU2635 | 46581039 | 0.370007   | 0.508391   |
| VIMSS208137 | DVU2638 | 46581042 | 0.605595   | 0.784511   |
| VIMSS208138 | DVU2639 | 46581043 | -2.15299   | -3.37478   |
| VIMSS208140 | DVU2641 | 46581045 | 0.165361   | 0.251865   |
| VIMSS208142 | DVU2643 | 46581047 | 0.290067   | 0.420011   |
| VIMSS208143 | DVU2644 | 46581048 | -0.0193757 | -0.0218287 |
| VIMSS208144 | DVU2645 | 46581049 | 0.456855   | 0.695572   |
| VIMSS208145 | DVU2646 | 46581050 | 0.364412   | 0.539974   |
| VIMSS208146 | DVU2647 | 46581051 | 1.27968    | 1.61483    |
| VIMSS208147 | DVU2648 | 46581052 | -1.44357   | -2.23638   |
| VIMSS208148 | DVU2649 | 46581053 | -1.07808   | -1.17673   |
| VIMSS208149 | DVU2650 | 46581054 | -3.53608   | -6.49219   |
| VIMSS208150 | DVU2651 | 46581055 | -0.811896  | -0.739466  |

|             |         |          |            |            |
|-------------|---------|----------|------------|------------|
| VIMSS208151 | DVU2652 | 46581056 | 0.189321   | 0.327823   |
| VIMSS208154 | DVU2655 | 46581059 | 0.0367694  | 0.0616181  |
| VIMSS208156 | DVU2657 | 46581061 | 1.33874    | 2.26777    |
| VIMSS208157 | DVU2658 | 46581062 | 0.0119343  | 0.0173162  |
| VIMSS208158 | DVU2659 | 46581063 | 0.675473   | 1.12865    |
| VIMSS208160 | DVU2661 | 46581065 | 0.662174   | 1.1216     |
| VIMSS208162 | DVU2663 | 46581067 | 1.27994    | 1.51795    |
| VIMSS208164 | DVU2665 | 46581069 | -0.164245  | -0.184501  |
| VIMSS208165 | DVU2666 | 46581070 | 0.119479   | 0.16237    |
| VIMSS208166 | DVU2667 | 46581071 | 0.535324   | 0.60427    |
| VIMSS208167 | DVU2668 | 46581072 | -0.347472  | -0.518126  |
| VIMSS208168 | DVU2669 | 46581073 | -0.0470498 | -0.0768522 |
| VIMSS208169 | DVU2670 | 46581074 | 0.36209    | 0.53256    |
| VIMSS208170 | DVU2671 | 46581075 | -1.35211   | -2.25495   |
| VIMSS208172 | DVU2673 | 46581077 | -0.339985  | -0.518002  |
| VIMSS208173 | DVU2674 | 46581078 | -0.0196573 | -0.0316064 |
| VIMSS208174 | DVU2675 | 46581079 | 1.78605    | 2.90268    |
| VIMSS208175 | DVU2676 | 46581080 | 1.44771    | 2.58898    |
| VIMSS208176 | DVU2677 | 46581081 | 0.00952604 | 0.0146142  |
| VIMSS208177 | DVU2678 | 46581082 | -0.951495  | -1.51017   |
| VIMSS208178 | DVU2679 | 46581083 | 1.30088    | 2.35781    |
| VIMSS208179 | DVU2680 | 46581084 | 0.00809728 | 0.00749384 |
| VIMSS208181 | DVU2682 | 46581086 | -1.90935   | -2.04985   |
| VIMSS208183 | DVU2683 | 46581087 | -0.715371  | -1.04857   |
| VIMSS208184 |         |          | 1.18424    | 2.03058    |
| VIMSS208186 | DVU2686 | 46581090 | -0.512265  | -0.924689  |
| VIMSS208188 |         |          | 0.803179   | 1.15802    |
| VIMSS208189 | DVU2688 | 46581092 | 0.76273    | 1.12634    |
| VIMSS208190 | DVU2689 | 46581093 | 0.724688   | 0.856733   |
| VIMSS208191 | DVU2690 | 46581094 | 1.43871    | 1.53147    |
| VIMSS208192 | DVU2691 | 46581095 | 0.892528   | 0.861739   |
| VIMSS208193 | DVU2692 | 46581096 | 1.54863    | 1.36888    |
| VIMSS208194 | DVU2693 | 46581097 | -1.08168   | -1.08962   |
| VIMSS208195 | DVU2694 | 46581098 | -0.0625324 | -0.0926501 |
| VIMSS208197 | DVU2696 | 46581100 | -0.562047  | -0.800459  |
| VIMSS208198 | DVU2697 | 46581101 | -0.57591   | -0.944024  |
| VIMSS208199 | DVU2698 | 46581102 | 0.265774   | 0.389131   |
| VIMSS208200 | DVU2699 | 46581103 | 1.54996    | 2.77894    |
| VIMSS208201 | DVU2700 | 46581104 | -0.746862  | -0.772092  |
| VIMSS208202 | DVU2701 | 46581105 | 2.21142    | 3.24235    |
| VIMSS208203 | DVU2702 | 46581106 | 0.645811   | 0.911282   |
| VIMSS208204 | DVU2703 | 46581107 | 0.448105   | 0.490672   |
| VIMSS208205 | DVU2704 | 46581108 | 2.30866    | 4.17395    |
| VIMSS208206 | DVU2705 | 46581109 | 0.983234   | 1.09377    |
| VIMSS208207 | DVU2706 | 46581110 | 2.57907    | 3.30824    |
| VIMSS208208 | DVU2707 | 46581111 | 0.113066   | 0.184995   |
| VIMSS208209 | DVU2708 | 46581112 | 0.196771   | 0.266384   |
| VIMSS208215 | DVU2712 | 46581116 | 1.02831    | 1.53627    |
| VIMSS208217 | DVU2714 | 46581118 | -0.174322  | -0.234858  |

|             |         |          |            |            |
|-------------|---------|----------|------------|------------|
| VIMSS208218 | DVU2715 | 46581119 | 1.26423    | 2.1161     |
| VIMSS208219 | DVU2716 | 46581120 | 0.2903     | 0.316623   |
| VIMSS208220 | DVU2717 | 46581121 | 0.0372806  | 0.0396532  |
| VIMSS208222 | DVU2719 | 46581123 | -0.302831  | -0.354869  |
| VIMSS208223 | DVU2720 | 46581124 | 1.48177    | 2.08119    |
| VIMSS208225 | DVU2721 | 46581125 | 0.830244   | 1.0727     |
| VIMSS208226 | DVU2722 | 46581126 | 0.782784   | 1.21855    |
| VIMSS208227 | DVU2723 | 46581127 | 0.403816   | 0.535668   |
| VIMSS208228 | DVU2724 | 46581128 | 1.24725    | 1.3406     |
| VIMSS208229 |         |          | -0.432826  | -0.545557  |
| VIMSS208232 | DVU2727 | 46581131 | -0.840528  | -1.0131    |
| VIMSS208233 | DVU2728 | 46581132 | 0.609814   | 0.954653   |
| VIMSS208234 | DVU2729 | 46581133 | 0.546022   | 0.594421   |
| VIMSS208235 | DVU2730 | 46581134 | 0.216521   | 0.265499   |
| VIMSS208236 | DVU2731 | 46581135 | 0.0922705  | 0.120075   |
| VIMSS208237 | DVU2732 | 46581136 | 0.829638   | 1.50756    |
| VIMSS208238 | DVU2733 | 46581137 | 0.853613   | 0.954546   |
| VIMSS208241 | DVU2735 | 46581139 | -0.125304  | -0.174173  |
| VIMSS208242 | DVU2736 | 46581140 | 1.63268    | 2.07482    |
| VIMSS208243 | DVU2737 | 46581141 | -0.186504  | -0.265276  |
| VIMSS208244 | DVU2738 | 46581142 | 0.572314   | 0.992533   |
| VIMSS208245 |         |          | 1.49348    | 2.24919    |
| VIMSS208247 | DVU2741 | 46581145 | 0.775044   | 1.267      |
| VIMSS208248 | DVU2742 | 46581146 | 0.947794   | 1.18384    |
| VIMSS208249 | DVU2743 | 46581147 | -1.38765   | -2.27534   |
| VIMSS208250 | DVU2744 | 46581148 | 0.502542   | 0.805768   |
| VIMSS208252 | DVU2746 | 46581150 | 1.11563    | 1.6402     |
| VIMSS208253 | DVU2747 | 46581151 | 0.506523   | 0.650143   |
| VIMSS208254 | DVU2748 | 46581152 | -0.0618309 | -0.0947781 |
| VIMSS208255 | DVU2749 | 46581153 | 0.1152     | 0.138733   |
| VIMSS208256 | DVU2750 | 46581154 | -0.419816  | -0.760163  |
| VIMSS208257 | DVU2751 | 46581155 | -0.951996  | -1.5486    |
| VIMSS208258 | DVU2752 | 46581156 | 0.188731   | 0.296683   |
| VIMSS208259 | DVU2753 | 46581157 | 0.359993   | 0.558578   |
| VIMSS208261 | DVU2755 | 46581159 | 1.45625    | 2.04598    |
| VIMSS208262 | DVU2756 | 46581160 | 0.122741   | 0.172669   |
| VIMSS208263 | DVU2757 | 46581161 | 0.434258   | 0.762121   |
| VIMSS208264 | DVU2758 | 46581162 | 1.25169    | 1.04237    |
| VIMSS208266 | DVU2760 | 46581164 | 1.40856    | 1.57312    |
| VIMSS208267 | DVU2761 | 46581165 | 0.622529   | 0.781288   |
| VIMSS208268 | DVU2762 | 46581166 | 0.764762   | 1.15525    |
| VIMSS208269 | DVU2764 | 46581168 | 0.122897   | 0.207054   |
| VIMSS208270 |         |          | 0.588117   | 0.955611   |
| VIMSS208271 | DVU2765 | 46581169 | 0.254588   | 0.351807   |
| VIMSS208272 | DVU2766 | 46581170 | 0.140601   | 0.186805   |
| VIMSS208273 | DVU2767 | 46581171 | 0.743474   | 0.881983   |
| VIMSS208274 | DVU2768 | 46581172 | 0.567666   | 0.866499   |
| VIMSS208275 | DVU2769 | 46581173 | 0.360041   | 0.397868   |
| VIMSS208276 | DVU2770 | 46581174 | 1.85005    | 3.00146    |

|             |         |           |            |            |
|-------------|---------|-----------|------------|------------|
| VIMSS208277 | DVU2771 | 46581175  | 1.10923    | 1.85061    |
| VIMSS208278 | DVU2772 | 46581176  | -0.724257  | -1.26586   |
| VIMSS208279 | DVU2773 | 46581177  | -0.0424016 | -0.0546456 |
| VIMSS208280 | DVU2774 | 46581178  | 0.789244   | 1.39471    |
| VIMSS208281 | DVU2775 | 46581179  | -0.334344  | -0.388947  |
| VIMSS208282 | DVU2776 | 46581180  | 2.36369    | 3.18627    |
| VIMSS208285 | DVU2779 | 46581183  | -0.104738  | -0.13016   |
| VIMSS208286 | DVU2780 | 46581184  | 0.688799   | 0.856466   |
| VIMSS208287 | DVU2781 | 46581185  | 1.38111    | 2.06703    |
| VIMSS208289 | DVU2783 | 46581187  | 0.446481   | 0.778977   |
| VIMSS208290 | DVU2784 | 46581188  | 0.635646   | 0.982087   |
| VIMSS208291 | DVU2785 | 46581189  | -0.467212  | -0.673799  |
| VIMSS208293 | DVU2787 | 46581191  | 1.38201    | 1.80655    |
| VIMSS208294 | DVU2788 | 46581192  | 2.89708    | 3.38083    |
| VIMSS208295 | DVU2789 | 46581193  | 0.207377   | 0.315714   |
| VIMSS208296 | DVU2790 | 46581194  | 0.147279   | 0.200184   |
| VIMSS208298 | DVU2792 | 46581196  | 1.97094    | 3.37241    |
| VIMSS208299 | DVU2793 | 46581197  | 2.60755    | 4.59305    |
| VIMSS208300 | DVU2794 | 46581198  | 2.70024    | 4.50957    |
| VIMSS208301 | DVU2795 | 46581199  | 1.71358    | 2.6763     |
| VIMSS208302 | DVU2796 | 46581200  | 2.51161    | 3.95249    |
| VIMSS208303 | DVU2797 | 46581201  | 1.4234     | 2.54991    |
| VIMSS208304 | DVU2798 | 46581202  | 2.94467    | 5.07444    |
| VIMSS208305 | DVU2799 | 46581203  | 0.702636   | 1.22877    |
| VIMSS208306 | DVU2800 | 46581204  | 1.25717    | 2.19445    |
| VIMSS208309 |         |           | -0.331141  | -0.597196  |
| VIMSS208310 | DVU2802 | 46581206  | 0.50512    | 0.660647   |
| VIMSS208311 | DVU2803 | 46581207  | 1.54449    | 2.82129    |
| VIMSS208313 | DVU2805 | 304569730 | 1.00656    | 1.11722    |
| VIMSS208314 | DVU2806 | 46581210  | 0.961981   | 1.39064    |
| VIMSS208315 | DVU2807 | 46581211  | 0.0605563  | 0.0558716  |
| VIMSS208317 | DVU2809 | 46581213  | 0.210695   | 0.335957   |
| VIMSS208318 | DVU2810 | 304569731 | -0.511534  | -0.537731  |
| VIMSS208319 | DVU2811 | 46581215  | 0.254137   | 0.345515   |
| VIMSS208324 | DVU2815 | 46581219  | 0.129066   | 0.180366   |
| VIMSS208325 | DVU2816 | 46581220  | -0.906771  | -1.08698   |
| VIMSS208326 | DVU2818 | 46581222  | -1.29358   | -2.26053   |
| VIMSS208327 | DVU2817 | 46581221  | 0.152043   | 0.217101   |
| VIMSS208328 | DVU2819 | 46581223  | 0.19684    | 0.319419   |
| VIMSS208330 | DVU2821 | 46581225  | -0.277707  | -0.269029  |
| VIMSS208331 | DVU2822 | 46581226  | -0.795934  | -1.15677   |
| VIMSS208332 | DVU2823 | 46581227  | -1.84548   | -2.84616   |
| VIMSS208333 | DVU2824 | 46581228  | -0.9879    | -1.4175    |
| VIMSS208334 | DVU2825 | 46581229  | 0.457872   | 0.575772   |
| VIMSS208336 | DVU2827 | 46581231  | 0.265754   | 0.465806   |
| VIMSS208338 | DVU2829 | 46581233  | -0.0952158 | -0.141873  |
| VIMSS208339 | DVU2830 | 46581234  | 0.848818   | 1.137      |
| VIMSS208340 | DVU2831 | 46581235  | 0.708741   | 1.23499    |
| VIMSS208341 | DVU2832 | 46581236  | 0.834944   | 0.946958   |

|             |         |          |           |           |
|-------------|---------|----------|-----------|-----------|
| VIMSS208342 | DVU2833 | 46581237 | 0.784706  | 1.04988   |
| VIMSS208344 | DVU2835 | 46581239 | -0.720887 | -1.10765  |
| VIMSS208345 | DVU2836 | 46581240 | 0.286894  | 0.476673  |
| VIMSS208346 | DVU2837 | 46581241 | -0.741636 | -1.34135  |
| VIMSS208347 | DVU2838 | 46581242 | -1.30126  | -1.95733  |
| VIMSS208348 | DVU2839 | 46581243 | -0.802241 | -1.30055  |
| VIMSS208350 | DVU2841 | 46581245 | -0.383014 | -0.553166 |
| VIMSS208351 | DVU2842 | 46581246 | -0.196734 | -0.351835 |
| VIMSS208352 | DVU2843 | 46581247 | -1.01772  | -1.57788  |
| VIMSS208353 | DVU2844 | 46581248 | -1.06112  | -1.4932   |
| VIMSS208354 | DVU2845 | 46581249 | 0.467033  | 0.793798  |
| VIMSS208355 | DVU2846 | 46581250 | 0.801249  | 1.0529    |
| VIMSS208356 | DVU2847 | 46581251 | 0.554042  | 0.657811  |
| VIMSS208358 | DVU2849 | 46581253 | 0.454445  | 0.600132  |
| VIMSS208359 | DVU2850 | 46581254 | 0.371387  | 0.50775   |
| VIMSS208360 | DVU2851 | 46581255 | 0.392834  | 0.641737  |
| VIMSS208361 | DVU2852 | 46581256 | 0.769203  | 0.922745  |
| VIMSS208362 | DVU2853 | 46581257 | 0.676716  | 0.739537  |
| VIMSS208363 | DVU2854 | 46581258 | 1.10234   | 1.51962   |
| VIMSS208364 | DVU2855 | 46581259 | 1.11164   | 1.65004   |
| VIMSS208365 | DVU2856 | 46581260 | 1.27957   | 1.00167   |
| VIMSS208366 | DVU2858 | 46581262 | -0.076897 | -0.140135 |
| VIMSS208367 | DVU2857 | 46581261 | -0.343877 | -0.311982 |
| VIMSS208368 | DVU2859 | 46581263 | -0.498977 | -0.587287 |
| VIMSS208369 | DVU2860 | 46581264 | 1.22991   | 1.83133   |
| VIMSS208370 | DVU2861 | 46581265 | 0.686731  | 0.990987  |
| VIMSS208371 | DVU2862 | 46581266 | -0.409152 | -0.600479 |
| VIMSS208372 | DVU2863 | 46581267 | -0.742355 | -1.01698  |
| VIMSS208373 | DVU2864 | 46581268 | 0.31943   | 0.547839  |
| VIMSS208374 | DVU2865 | 46581269 | 2.72321   | 3.58662   |
| VIMSS208375 | DVU2866 | 46581270 | -0.823803 | -1.26988  |
| VIMSS208376 | DVU2867 | 46581271 | -1.12237  | -1.54647  |
| VIMSS208377 | DVU2868 | 46581272 | 1.26248   | 1.63097   |
| VIMSS208378 | DVU2869 | 46581273 | -0.483315 | -0.721952 |
| VIMSS208379 | DVU2870 | 46581274 | -0.714153 | -1.00764  |
| VIMSS208380 | DVU2871 | 46581275 | -1.36502  | -1.8442   |
| VIMSS208381 | DVU2872 | 46581276 | -1.2794   | -2.048    |
| VIMSS208382 | DVU2873 | 46581277 | 0.848082  | 1.2438    |
| VIMSS208383 | DVU2874 | 46581278 | 2.39814   | 2.84578   |
| VIMSS208384 | DVU2875 | 46581279 | 0.0958339 | 0.0958666 |
| VIMSS208385 | DVU2876 | 46581280 | 1.11442   | 1.69544   |
| VIMSS208386 | DVU2877 | 46581281 | -0.376596 | -0.472808 |
| VIMSS208387 | DVU2878 | 46581282 | 0.614995  | 0.965577  |
| VIMSS208388 | DVU2879 | 46581283 | 2.86617   | 1.4314    |
| VIMSS208389 | DVU2880 | 46581284 | -1.03351  | -1.07315  |
| VIMSS208390 | DVU2881 | 46581285 | 0.714001  | 0.789488  |
| VIMSS208391 | DVU2882 | 46581286 | -1.60546  | -2.40112  |
| VIMSS208392 | DVU2883 | 46581287 | 0.554705  | 1.04165   |
| VIMSS208393 | DVU2884 | 46581288 | -0.765038 | -1.3489   |

|             |         |           |            |            |
|-------------|---------|-----------|------------|------------|
| VIMSS208394 | DVU2885 | 46581289  | 0.397182   | 0.516218   |
| VIMSS208395 | DVU2886 | 46581290  | -0.106835  | -0.147386  |
| VIMSS208396 | DVU2887 | 46581291  | -0.116898  | -0.16171   |
| VIMSS208397 | DVU2888 | 46581292  | -0.189437  | -0.280788  |
| VIMSS208398 | DVU2889 | 46581293  | -0.277395  | -0.432039  |
| VIMSS208399 |         |           | 0.181789   | 0.21577    |
| VIMSS208400 | DVU2891 | 46581295  | -0.190087  | -0.263613  |
| VIMSS208401 | DVU2892 | 304569732 | -0.529022  | -0.884418  |
| VIMSS208402 | DVU2893 | 46581297  | 0.233666   | 0.399565   |
| VIMSS208403 | DVU2894 | 46581298  | 1.12872    | 1.92383    |
| VIMSS208404 | DVU2895 | 46581299  | 1.41335    | 2.18913    |
| VIMSS208405 | DVU2896 | 46581300  | 0.540306   | 0.947935   |
| VIMSS208406 | DVU2897 | 46581301  | 1.73912    | 2.9341     |
| VIMSS208407 | DVU2898 | 46581302  | 1.05931    | 1.64065    |
| VIMSS208408 | DVU2899 | 46581303  | 0.169638   | 0.228181   |
| VIMSS208409 | DVU2900 | 46581304  | 0.248452   | 0.259059   |
| VIMSS208411 | DVU2901 | 46581305  | 0.229495   | 0.295117   |
| VIMSS208412 | DVU2902 | 46581306  | -0.01456   | -0.0210141 |
| VIMSS208413 | DVU2903 | 46581307  | -0.479246  | -0.694383  |
| VIMSS208415 | DVU2905 | 46581309  | 0.635545   | 0.815039   |
| VIMSS208416 | DVU2906 | 46581310  | 0.969553   | 1.02897    |
| VIMSS208417 | DVU2907 | 46581311  | 1.1857     | 1.3877     |
| VIMSS208418 | DVU2908 | 46581312  | -0.420215  | -0.493004  |
| VIMSS208419 | DVU2909 | 46581313  | 0.578425   | 0.741531   |
| VIMSS208420 | DVU2910 | 46581314  | -2.82234   | -2.94504   |
| VIMSS208421 | DVU2911 | 46581315  | -0.234242  | -0.307917  |
| VIMSS208422 | DVU2912 | 46581316  | -1.44734   | -2.06042   |
| VIMSS208423 | DVU2913 | 46581317  | -1.89853   | -3.43179   |
| VIMSS208424 | DVU2914 | 46581318  | -1.31707   | -1.72014   |
| VIMSS208425 | DVU2915 | 46581319  | 1.6677     | 2.53305    |
| VIMSS208426 | DVU2916 | 46581320  | -0.938888  | -1.18591   |
| VIMSS208427 | DVU2917 | 46581321  | -2.70865   | -3.589     |
| VIMSS208428 | DVU2918 | 46581322  | -0.0645988 | -0.079417  |
| VIMSS208430 | DVU2920 | 46581324  | -1.20224   | -1.11636   |
| VIMSS208431 | DVU2921 | 46581325  | -1.86536   | -2.52238   |
| VIMSS208432 | DVU2922 | 46581326  | -3.08132   | -4.0789    |
| VIMSS208433 | DVU2923 | 46581327  | -2.4705    | -3.5947    |
| VIMSS208434 | DVU2924 | 46581328  | -2.32561   | -2.65159   |
| VIMSS208435 | DVU2925 | 46581329  | -2.48945   | -3.38947   |
| VIMSS208436 | DVU2926 | 46581330  | -1.95455   | -2.19003   |
| VIMSS208437 | DVU2927 | 46581331  | -2.66831   | -3.82851   |
| VIMSS208438 | DVU2928 | 46581332  | -0.310421  | -0.503859  |
| VIMSS208439 | DVU2929 | 46581333  | -0.802808  | -1.3532    |
| VIMSS208441 | DVU2931 | 46581335  | -0.362107  | -0.560039  |
| VIMSS208442 | DVU2932 | 46581336  | 0.658675   | 0.900439   |
| VIMSS208443 | DVU2933 | 46581337  | -0.15103   | -0.218309  |
| VIMSS208444 | DVU2934 | 46581338  | -0.10878   | -0.146948  |
| VIMSS208445 | DVU2935 | 46581339  | 1.37488    | 2.18482    |
| VIMSS208447 | DVU2937 | 46581341  | 1.18714    | 1.92132    |



|             |         |          |           |           |
|-------------|---------|----------|-----------|-----------|
| VIMSS208448 | DVU2938 | 46581342 | 0.807774  | 1.30603   |
| VIMSS208449 | DVU2939 | 46581343 | 0.0459894 | 0.0516102 |
| VIMSS208450 |         |          | 1.27635   | 1.72478   |
| VIMSS208451 | DVU2941 | 46581345 | -0.896981 | -1.13815  |
| VIMSS208452 | DVU2942 | 46581346 | -0.879207 | -1.34102  |
| VIMSS208453 | DVU2943 | 46581347 | 0.314225  | 0.467083  |
| VIMSS208454 | DVU2944 | 46581348 | 0.455453  | 0.563997  |
| VIMSS208455 | DVU2945 | 46581349 | -0.224406 | -0.362987 |
| VIMSS208456 | DVU2946 | 46581350 | -0.424222 | -0.625407 |
| VIMSS208458 | DVU2948 | 46581352 | 0.415448  | 0.568585  |
| VIMSS208459 | DVU2949 | 46581353 | -1.56707  | -1.86569  |
| VIMSS208462 | DVU2951 | 46581354 | 0.231006  | 0.433481  |
| VIMSS208463 | DVU2952 | 46581355 | 0.929357  | 1.19747   |
| VIMSS208464 | DVU2953 | 46581356 | -0.915611 | -1.13402  |
| VIMSS208465 | DVU2954 | 46581357 | 0.134378  | 0.14233   |
| VIMSS208467 | DVU2956 | 46581359 | -0.299494 | -0.43188  |
| VIMSS208470 | DVU2957 | 46581360 | -3.64861  | -3.33911  |
| VIMSS208471 | DVU2958 | 46581361 | -1.8658   | -2.55993  |
| VIMSS208472 | DVU2959 | 46581362 | -2.6838   | -3.23277  |
| VIMSS208473 | DVU2960 | 46581363 | -0.910455 | -1.37738  |
| VIMSS208474 | DVU2961 | 46581364 | -0.10608  | -0.160197 |
| VIMSS208475 | DVU2962 | 46581365 | -0.304478 | -0.437595 |
| VIMSS208476 | DVU2963 | 46581366 | -0.738466 | -0.959012 |
| VIMSS208477 | DVU2964 | 46581367 | -0.673649 | -0.809688 |
| VIMSS208478 | DVU2965 | 46581368 | 0.503602  | 0.784009  |
| VIMSS208479 | DVU2966 | 46581369 | -0.508756 | -0.736107 |
| VIMSS208480 | DVU2967 | 46581370 | 0.191677  | 0.291314  |
| VIMSS208481 | DVU2968 | 46581371 | 1.62921   | 1.88001   |
| VIMSS208482 | DVU2969 | 46581372 | 1.18284   | 1.82678   |
| VIMSS208483 | DVU2970 | 46581373 | 0.967028  | 1.44655   |
| VIMSS208484 | DVU2971 | 46581374 | 0.0913573 | 0.149367  |
| VIMSS208486 | DVU2973 | 46581376 | 1.47342   | 2.71957   |
| VIMSS208487 | DVU2974 | 46581377 | 0.608174  | 0.99661   |
| VIMSS208488 | DVU2975 | 46581378 | 2.52493   | 3.20361   |
| VIMSS208489 | DVU2976 | 46581379 | 0.807955  | 1.27692   |
| VIMSS208492 | DVU2979 | 46581382 | 0.258356  | 0.434136  |
| VIMSS208493 | DVU2980 | 46581383 | 0.312539  | 0.457664  |
| VIMSS208494 | DVU2981 | 46581384 | 0.140764  | 0.180511  |
| VIMSS208495 | DVU2982 | 46581385 | -0.522011 | -0.706565 |
| VIMSS208496 | DVU2983 | 46581386 | -0.172725 | -0.295016 |
| VIMSS208497 | DVU2984 | 46581387 | 0.289899  | 0.441513  |
| VIMSS208498 | DVU2985 | 46581388 | 0.298871  | 0.490008  |
| VIMSS208499 | DVU2986 | 46581389 | 1.24007   | 1.62429   |
| VIMSS208500 | DVU2987 | 46581390 | 1.31784   | 1.67309   |
| VIMSS208501 | DVU2988 | 46581391 | 0.308087  | 0.4578    |
| VIMSS208502 | DVU2989 | 46581392 | 0.412656  | 0.533606  |
| VIMSS208503 | DVU2990 | 46581393 | 0.612172  | 0.988785  |
| VIMSS208504 |         |          | -0.347617 | -0.547772 |
| VIMSS208505 | DVU2992 | 46581395 | 0.555082  | 0.735797  |

|             |         |           |            |            |
|-------------|---------|-----------|------------|------------|
| VIMSS208506 | DVU2993 | 46581396  | 0.439928   | 0.575332   |
| VIMSS208508 | DVU2995 | 46581398  | 0.788836   | 1.10653    |
| VIMSS208509 | DVU2996 | 46581399  | 0.175685   | 0.255354   |
| VIMSS208510 | DVU2997 | 46581400  | 0.959043   | 1.13091    |
| VIMSS208512 | DVU2999 | 46581402  | 0.440977   | 0.65577    |
| VIMSS208513 | DVU3000 | 46581403  | 0.6483     | 0.808343   |
| VIMSS208514 | DVU3001 | 46581404  | 0.419553   | 0.628053   |
| VIMSS208515 | DVU3002 | 46581405  | 0.0616121  | 0.10346    |
| VIMSS208516 | DVU3003 | 46581406  | 0.822047   | 1.39423    |
| VIMSS208517 |         |           | 0.37089    | 0.546223   |
| VIMSS208518 | DVU3005 | 46581408  | -0.110362  | -0.174281  |
| VIMSS208519 | DVU3006 | 46581409  | -0.900015  | -1.40872   |
| VIMSS208520 | DVU3007 | 46581410  | 1.43543    | 1.54343    |
| VIMSS208521 | DVU3008 | 46581411  | -1.1564    | -1.71841   |
| VIMSS208522 | DVU3009 | 46581412  | 0.695746   | 1.08351    |
| VIMSS208523 | DVU3010 | 46581413  | 0.857717   | 1.27727    |
| VIMSS208524 | DVU3011 | 46581414  | 0.950079   | 1.49279    |
| VIMSS208525 | DVU3012 | 46581415  | 1.7254     | 2.66453    |
| VIMSS208526 | DVU3013 | 46581416  | 0.589199   | 0.991559   |
| VIMSS208527 | DVU3014 | 46581417  | 0.984841   | 1.19883    |
| VIMSS208528 | DVU3015 | 46581418  | 0.700974   | 0.914757   |
| VIMSS208529 | DVU3016 | 46581419  | 0.289039   | 0.438058   |
| VIMSS208530 |         |           | 0.0643556  | 0.0920231  |
| VIMSS208531 | DVU3018 | 46581421  | 0.755491   | 1.19169    |
| VIMSS208532 | DVU3019 | 46581422  | 0.698529   | 1.12818    |
| VIMSS208533 | DVU3020 | 46581423  | 0.89269    | 1.32615    |
| VIMSS208534 | DVU3021 | 46581424  | 1.10025    | 1.47153    |
| VIMSS208536 | DVU3022 | 46581425  | 0.146539   | 0.22388    |
| VIMSS208537 | DVU3023 | 46581426  | -0.960924  | -1.15854   |
| VIMSS208538 | DVU3024 | 46581427  | -2.21157   | -2.4716    |
| VIMSS208539 | DVU3025 | 46581428  | -3.08681   | -3.63512   |
| VIMSS208540 | DVU3026 | 46581429  | 1.67823    | 2.44832    |
| VIMSS208541 | DVU3027 | 46581430  | -2.0643    | -2.60142   |
| VIMSS208542 | DVU3028 | 46581431  | -0.461076  | -0.787914  |
| VIMSS208543 | DVU3029 | 46581432  | -0.683723  | -1.23421   |
| VIMSS208544 | DVU3030 | 46581433  | -2.61806   | -3.67187   |
| VIMSS208545 | DVU3031 | 46581434  | -1.91816   | -2.32525   |
| VIMSS208546 | DVU3032 | 46581435  | -2.60121   | -3.81583   |
| VIMSS208547 | DVU3033 | 46581436  | -2.41814   | -3.68931   |
| VIMSS208550 | DVU3035 | 304569734 | -0.250789  | -0.432924  |
| VIMSS208551 | DVU3036 | 46581439  | 1.05904    | 1.67212    |
| VIMSS208552 | DVU3037 | 46581440  | 0.809237   | 1.35654    |
| VIMSS208554 | DVU3039 | 46581442  | -0.0495616 | -0.0729288 |
| VIMSS208556 | DVU3041 | 46581444  | 1.24269    | 2.09128    |
| VIMSS208557 | DVU3042 | 46581445  | 1.69579    | 2.87807    |
| VIMSS208561 | DVU3046 | 46581449  | -0.182037  | -0.219202  |
| VIMSS208563 | DVU3048 | 46581451  | 0.0188745  | 0.0249328  |
| VIMSS208564 | DVU3049 | 46581452  | 0.342125   | 0.607145   |
| VIMSS208565 | DVU3050 | 46581453  | 0.217902   | 0.30669    |

|             |         |          |            |            |
|-------------|---------|----------|------------|------------|
| VIMSS208566 | DVU3051 | 46581454 | -0.0728985 | -0.101364  |
| VIMSS208567 | DVU3052 | 46581455 | 0.560112   | 0.625489   |
| VIMSS208568 | DVU3053 | 46581456 | -0.787177  | -1.32986   |
| VIMSS208569 | DVU3054 | 46581457 | 1.95629    | 2.72978    |
| VIMSS208570 | DVU3055 | 46581458 | -0.435233  | -0.508256  |
| VIMSS208571 | DVU3056 | 46581459 | -0.591066  | -0.952422  |
| VIMSS208572 | DVU3057 | 46581460 | 1.63348    | 2.26067    |
| VIMSS208573 | DVU3058 | 46581461 | 0.637685   | 0.787893   |
| VIMSS208574 | DVU3059 | 46581462 | -0.0524799 | -0.0846957 |
| VIMSS208576 | DVU3061 | 46581464 | 0.794623   | 1.26065    |
| VIMSS208577 | DVU3062 | 46581465 | 1.94046    | 2.67711    |
| VIMSS208578 | DVU3063 | 46581466 | 1.48938    | 1.77745    |
| VIMSS208579 | DVU3064 | 46581467 | -0.223652  | -0.307353  |
| VIMSS208580 | DVU3065 | 46581468 | -0.393678  | -0.71229   |
| VIMSS208581 | DVU3066 | 46581469 | -0.7241    | -1.23724   |
| VIMSS208582 |         |          | 0.798713   | 1.12961    |
| VIMSS208584 | DVU3068 | 46581471 | 0.720255   | 1.25062    |
| VIMSS208586 | DVU3070 | 46581473 | -1.51142   | -1.96162   |
| VIMSS208587 | DVU3071 | 46581474 | -0.971228  | -1.65041   |
| VIMSS208588 | DVU3072 | 46581475 | -0.282507  | -0.321278  |
| VIMSS208590 | DVU3074 | 46581477 | 0.100714   | 0.123509   |
| VIMSS208592 | DVU3076 | 46581479 | 1.94289    | 3.5592     |
| VIMSS208593 | DVU3077 | 46581480 | 2.41457    | 4.49129    |
| VIMSS208595 | DVU3079 | 46581482 | 0.49184    | 0.762709   |
| VIMSS208596 | DVU3080 | 46581483 | -0.537036  | -0.892349  |
| VIMSS208597 | DVU3081 | 46581484 | -3.00135   | -3.13932   |
| VIMSS208598 | DVU3082 | 46581485 | 0.0930177  | 0.152972   |
| VIMSS208600 | DVU3084 | 46581487 | -0.593394  | -1.04543   |
| VIMSS208601 | DVU3085 | 46581488 | 0.798224   | 1.35657    |
| VIMSS208602 | DVU3086 | 46581489 | -0.270532  | -0.315336  |
| VIMSS208603 | DVU3087 | 46581490 | 0.491537   | 0.542015   |
| VIMSS208604 | DVU3088 | 46581491 | -0.390722  | -0.578484  |
| VIMSS208605 | DVU3089 | 46581492 | -1.009     | -1.44892   |
| VIMSS208606 | DVU3090 | 46581493 | -1.84798   | -3.10206   |
| VIMSS208607 | DVU3091 | 46581494 | 0.69697    | 0.921625   |
| VIMSS208609 | DVU3092 | 46581495 | -1.05674   | -1.58813   |
| VIMSS208610 | DVU3093 | 46581496 | 1.57232    | 2.22533    |
| VIMSS208611 | DVU3094 | 46581497 | 0.533645   | 0.668331   |
| VIMSS208612 | DVU3095 | 46581498 | 0.146497   | 0.119023   |
| VIMSS208614 | DVU3097 | 46581500 | 0.0865615  | 0.14995    |
| VIMSS208615 | DVU3098 | 46581501 | 0.303153   | 0.391722   |
| VIMSS208616 | DVU3099 | 46581502 | -1.0958    | -1.62166   |
| VIMSS208617 | DVU3100 | 46581503 | -0.702934  | -1.07126   |
| VIMSS208618 | DVU3101 | 46581504 | -1.10244   | -1.69705   |
| VIMSS208619 | DVU3102 | 46581505 | -0.364975  | -0.436599  |
| VIMSS208620 | DVU3103 | 46581506 | -2.28588   | -2.65723   |
| VIMSS208621 | DVU3104 | 46581507 | 1.08926    | 1.66845    |
| VIMSS208624 |         |          | 0.273402   | 0.304123   |
| VIMSS208625 | DVU3107 | 46581510 | 1.77582    | 1.96019    |

|             |         |          |            |            |
|-------------|---------|----------|------------|------------|
| VIMSS208626 | DVU3108 | 46581511 | -0.601243  | -0.680629  |
| VIMSS208627 | DVU3109 | 46581512 | -0.811791  | -1.02797   |
| VIMSS208628 | DVU3110 | 46581513 | 0.28101    | 0.276387   |
| VIMSS208629 |         |          | 0.143719   | 0.204336   |
| VIMSS208630 | DVU3112 | 46581515 | 0.547899   | 1.01206    |
| VIMSS208631 | DVU3113 | 46581516 | -0.866713  | -1.5525    |
| VIMSS208632 | DVU3114 | 46581517 | 0.105079   | 0.19235    |
| VIMSS208635 | DVU3117 | 46581520 | 2.07856    | 3.57414    |
| VIMSS208637 | DVU3119 | 46581522 | -0.636058  | -0.948601  |
| VIMSS208639 | DVU3121 | 46581524 | 0.548153   | 0.727319   |
| VIMSS208640 | DVU3122 | 46581525 | -0.117422  | -0.106245  |
| VIMSS208641 | DVU3123 | 46581526 | 0.217991   | 0.219061   |
| VIMSS208643 | DVU3125 | 46581528 | 0.513823   | 0.875116   |
| VIMSS208645 | DVU3126 |          | 1.06813    | 1.33259    |
| VIMSS208646 | DVU3127 | 46581529 | 0.872243   | 1.21314    |
| VIMSS208647 | DVU3128 | 46581530 | 1.24118    | 2.13288    |
| VIMSS208648 | DVU3129 | 46581531 | 0.425163   | 0.596437   |
| VIMSS208649 | DVU3130 | 46581532 | -0.616993  | -0.521273  |
| VIMSS208650 | DVU3131 | 46581533 | 2.1512     | 2.96775    |
| VIMSS208651 | DVU3132 | 46581534 | 1.68086    | 2.7023     |
| VIMSS208652 | DVU3133 | 46581535 | 2.6814     | 3.36896    |
| VIMSS208653 | DVU3134 | 46581536 | 2.33725    | 3.7049     |
| VIMSS208655 | DVU3136 | 46581538 | 0.948021   | 1.54887    |
| VIMSS208656 | DVU3137 | 46581539 | 1.30132    | 1.62692    |
| VIMSS208659 | DVU3140 | 46581542 | -0.372742  | -0.495924  |
| VIMSS208661 | DVU3142 | 46581544 | 1.67919    | 2.45303    |
| VIMSS208662 | DVU3143 | 46581545 | 1.26036    | 1.68062    |
| VIMSS208663 | DVU3144 | 46581546 | 1.24783    | 1.55222    |
| VIMSS208664 | DVU3145 | 46581547 | 1.1606     | 1.47451    |
| VIMSS208665 | DVU3146 | 46581548 | 0.666124   | 1.18324    |
| VIMSS208667 | DVU3148 | 46581550 | 1.13454    | 1.5907     |
| VIMSS208668 | DVU3149 | 46581551 | 0.48603    | 0.719076   |
| VIMSS208669 | DVU3150 | 46581552 | -0.301147  | -0.548065  |
| VIMSS208670 | DVU3151 | 46581553 | 0.192794   | 0.212333   |
| VIMSS208672 | DVU3153 | 46581555 | 0.692731   | 0.943233   |
| VIMSS208673 | DVU3154 | 46581556 | 0.0377189  | 0.0602825  |
| VIMSS208674 | DVU3155 | 46581557 | 0.676703   | 1.00493    |
| VIMSS208676 | DVU3157 | 46581559 | 0.397592   | 0.570814   |
| VIMSS208677 | DVU3158 | 46581560 | 1.57774    | 2.65533    |
| VIMSS208681 | DVU3161 | 46581563 | -0.467804  | -0.471939  |
| VIMSS208683 | DVU3163 | 46581565 | 1.31139    | 2.15866    |
| VIMSS208684 | DVU3164 | 46581566 | 0.385279   | 0.698593   |
| VIMSS208685 | DVU3165 | 46581567 | -0.249483  | -0.396146  |
| VIMSS208686 | DVU3166 | 46581568 | 0.747307   | 0.81704    |
| VIMSS208688 | DVU3168 | 46581570 | -1.03999   | -1.74288   |
| VIMSS208689 | DVU3169 | 46581571 | 0.936352   | 1.61202    |
| VIMSS208691 | DVU3170 | 46581572 | 0.713083   | 0.907607   |
| VIMSS208693 |         |          | -0.0376459 | -0.0620572 |
| VIMSS208694 | DVU3173 | 46581575 | -0.739804  | -1.2163    |

|             |         |           |            |            |
|-------------|---------|-----------|------------|------------|
| VIMSS208695 | DVU3174 | 46581576  | -0.0227128 | -0.0405092 |
| VIMSS208696 | DVU3175 | 46581577  | -1.53133   | -2.35646   |
| VIMSS208697 | DVU3176 | 46581578  | -0.233619  | -0.402086  |
| VIMSS208698 | DVU3177 | 46581579  | 0.0369229  | 0.0617954  |
| VIMSS208699 |         |           | 0.241505   | 0.424797   |
| VIMSS208700 | DVU3179 | 46581581  | 0.172622   | 0.287056   |
| VIMSS208701 | DVU3180 | 46581582  | 0.314716   | 0.433955   |
| VIMSS208702 | DVU3181 | 304569735 | -0.691691  | -1.00827   |
| VIMSS208703 | DVU3182 | 46581584  | 1.95426    | 2.58218    |
| VIMSS208705 | DVU3184 | 46581586  | -0.686644  | -1.07396   |
| VIMSS208707 | DVU3186 | 46581588  | 0.667024   | 0.961756   |
| VIMSS208708 | DVU3187 | 46581589  | 0.715507   | 1.09551    |
| VIMSS208709 | DVU3188 | 46581590  | 0.607856   | 0.745721   |
| VIMSS208710 | DVU3189 | 46581591  | -0.882964  | -1.5705    |
| VIMSS208711 | DVU3190 | 46581592  | -0.368754  | -0.609601  |
| VIMSS208712 | DVU3191 | 46581593  | -0.842282  | -1.20048   |
| VIMSS208713 | DVU3192 | 46581594  | -0.100895  | -0.161579  |
| VIMSS208714 |         |           | 0.0732173  | 0.128171   |
| VIMSS208715 | DVU3194 | 46581596  | -0.271349  | -0.34324   |
| VIMSS208716 | DVU3195 | 46581597  | 0.62589    | 0.822033   |
| VIMSS208717 |         |           | 0.599361   | 0.875531   |
| VIMSS208718 | DVU3197 | 46581599  | 0.803924   | 1.49818    |
| VIMSS208719 | DVU3198 | 46581600  | -0.661931  | -1.03295   |
| VIMSS208720 | DVU3199 | 46581601  | -1.43935   | -2.06549   |
| VIMSS208721 | DVU3200 | 46581602  | -0.545839  | -0.877709  |
| VIMSS208722 | DVU3201 | 46581603  | 2.12148    | 2.9476     |
| VIMSS208723 | DVU3202 | 46581604  | -0.441879  | -0.500185  |
| VIMSS208724 |         |           | -0.103354  | -0.152566  |
| VIMSS208725 | DVU3204 | 46581606  | -0.31612   | -0.490853  |
| VIMSS208726 | DVU3205 | 46581607  | 0.105432   | 0.146521   |
| VIMSS208728 |         |           | -1.26819   | -1.61385   |
| VIMSS208729 | DVU3207 | 46581609  | -0.420304  | -0.528089  |
| VIMSS208730 | DVU3208 | 46581610  | -0.305348  | -0.471404  |
| VIMSS208732 |         |           | -0.291606  | -0.446554  |
| VIMSS208734 | DVU3212 | 46581614  | -1.46386   | -1.8373    |
| VIMSS208735 | DVU3213 | 46581615  | 0.889644   | 1.23198    |
| VIMSS208736 | DVU3214 | 46581616  | 1.05024    | 1.62722    |
| VIMSS208737 | DVU3215 | 46581617  | 0.502768   | 0.585807   |
| VIMSS208738 | DVU3216 | 46581618  | 0.914022   | 1.25067    |
| VIMSS208739 | DVU3217 | 46581619  | 1.74798    | 3.08061    |
| VIMSS208740 | DVU3218 | 46581620  | 0.813223   | 1.22442    |
| VIMSS208741 | DVU3219 | 304569737 | 0.458459   | 0.776486   |
| VIMSS208742 | DVU3220 | 46581622  | 0.399134   | 0.650428   |
| VIMSS208743 | DVU3221 | 46581623  | 0.42466    | 0.739118   |
| VIMSS208744 | DVU3222 | 46581624  | 1.19147    | 1.82528    |
| VIMSS208745 | DVU3223 | 46581625  | 0.268443   | 0.372062   |
| VIMSS208746 | DVU3224 | 46581626  | -0.165474  | -0.188481  |
| VIMSS208747 | DVU3225 | 46581627  | 1.22224    | 1.88155    |
| VIMSS208748 | DVU3226 | 46581628  | 0.476512   | 0.751469   |

|             |         |          |            |            |
|-------------|---------|----------|------------|------------|
| VIMSS208750 | DVU3228 | 46581630 | 0.29644    | 0.455285   |
| VIMSS208752 | DVU3230 | 46581632 | 0.0728221  | 0.0890478  |
| VIMSS208754 | DVU3232 | 46581634 | -0.214567  | -0.334192  |
| VIMSS208755 | DVU3233 | 46581635 | -1.35431   | -1.64961   |
| VIMSS208757 | DVU3234 | 46581636 | 0.00276702 | 0.00371084 |
| VIMSS208758 | DVU3235 | 46581637 | -0.159306  | -0.224099  |
| VIMSS208759 | DVU3236 | 46581638 | -0.614116  | -0.712075  |
| VIMSS208761 | DVU3238 | 46581640 | 0.0303899  | 0.0414012  |
| VIMSS208762 | DVU3239 | 46581641 | -0.278162  | -0.434537  |
| VIMSS208763 |         |          | -0.190114  | -0.252932  |
| VIMSS208764 | DVU3241 | 46581643 | -0.353379  | -0.400357  |
| VIMSS208765 | DVU3242 | 46581644 | 1.16173    | 2.00308    |
| VIMSS208766 | DVU3243 | 46581645 | -1.3       | -1.70963   |
| VIMSS208768 | DVU3245 | 46581647 | -0.329959  | -0.626975  |
| VIMSS208769 | DVU3246 | 46581648 | 1.54999    | 2.1944     |
| VIMSS208771 | DVU3247 | 46581649 | 1.08918    | 1.61161    |
| VIMSS208772 | DVU3248 | 46581650 | 1.37137    | 1.73814    |
| VIMSS208774 |         |          | 0.318892   | 0.373201   |
| VIMSS208775 | DVU3251 | 46581653 | 0.943414   | 0.947566   |
| VIMSS208776 | DVU3252 | 46581654 | 0.236616   | 0.332882   |
| VIMSS208777 | DVU3253 | 46581655 | -0.337063  | -0.525164  |
| VIMSS208778 | DVU3254 | 46581656 | 1.50964    | 2.12202    |
| VIMSS208779 | DVU3255 | 46581657 | -0.0733212 | -0.0846626 |
| VIMSS208780 | DVU3256 | 46581658 | 0.239677   | 0.246021   |
| VIMSS208782 | DVU3258 | 46581660 | 0.231661   | 0.29422    |
| VIMSS208783 | DVU3259 | 46581661 | 0.409188   | 0.66122    |
| VIMSS208784 |         |          | 0.55689    | 0.626818   |
| VIMSS208785 | DVU3261 | 46581663 | 1.01446    | 1.43108    |
| VIMSS208786 | DVU3262 | 46581664 | 0.20377    | 0.245559   |
| VIMSS208787 | DVU3263 | 46581665 | 1.36445    | 1.81475    |
| VIMSS208788 | DVU3264 | 46581666 | 0.281191   | 0.390777   |
| VIMSS208790 | DVU3266 | 46581668 | 1.68349    | 2.74939    |
| VIMSS208791 |         |          | 0.010825   | 0.0178686  |
| VIMSS208792 | DVU3268 | 46581670 | 0.0639599  | 0.0985982  |
| VIMSS208793 | DVU3269 | 46581671 | 0.668208   | 0.850734   |
| VIMSS208794 | DVU3270 | 46581672 | 2.52744    | 3.23232    |
| VIMSS208795 | DVU3271 | 46581673 | 2.20125    | 3.57759    |
| VIMSS208796 | DVU3272 | 46581674 | -1.3377    | -1.93915   |
| VIMSS208797 | DVU3273 | 46581675 | -0.785856  | -1.00343   |
| VIMSS208798 | DVU3274 | 46581676 | 0.350022   | 0.598823   |
| VIMSS208799 | DVU3275 | 46581677 | 0.0731116  | 0.132838   |
| VIMSS208800 | DVU3276 | 46581678 | 0.0921912  | 0.0796747  |
| VIMSS208802 | DVU3278 | 46581680 | 0.533984   | 0.803203   |
| VIMSS208803 | DVU3279 | 46581681 | -0.909889  | -1.17656   |
| VIMSS208806 | DVU3281 | 46581682 | -0.656778  | -0.891643  |
| VIMSS208807 | DVU3282 | 46581683 | 1.13345    | 1.53323    |
| VIMSS208809 | DVU3283 | 46581684 | -0.0720875 | -0.109874  |
| VIMSS208810 | DVU3284 | 46581685 | 0.461408   | 0.553721   |
| VIMSS208811 | DVU3285 | 46581686 | -0.094293  | -0.10173   |

|             |         |          |            |            |
|-------------|---------|----------|------------|------------|
| VIMSS208813 |         |          | -1.15948   | -1.3531    |
| VIMSS208816 | DVU3289 | 46581690 | -0.234887  | -0.275999  |
| VIMSS208817 | DVU3290 | 46581691 | -0.194659  | -0.263298  |
| VIMSS208818 | DVU3291 | 46581692 | 0.441093   | 0.530523   |
|             |         |          | -          |            |
| VIMSS208819 | DVU3292 | 46581693 | 0.00582798 | -0.0064549 |
| VIMSS208820 | DVU3293 | 46581694 | 1.45629    | 2.34052    |
| VIMSS208821 | DVU3294 | 46581695 | 0.816825   | 1.19934    |
| VIMSS208822 | DVU3295 | 46581696 | 2.62981    | 3.04839    |
| VIMSS208823 | DVU3296 | 46581697 | 1.67122    | 2.41087    |
| VIMSS208824 | DVU3297 | 46581698 | -0.998525  | -1.37856   |
| VIMSS208825 | DVU3298 | 46581699 | 0.836666   | 1.09287    |
| VIMSS208826 | DVU3299 | 46581700 | 0.360291   | 0.539922   |
| VIMSS208827 | DVU3300 | 46581701 | 1.02286    | 1.21615    |
| VIMSS208828 | DVU3301 | 46581702 | 0.356332   | 0.349069   |
| VIMSS208829 |         |          | -0.598548  | -0.680818  |
| VIMSS208830 | DVU3303 | 46581704 | 1.34361    | 1.85308    |
| VIMSS208832 | DVU3305 | 46581705 | 0.0527269  | 0.0622666  |
| VIMSS208833 | DVU3306 | 46581706 | -1.06971   | -1.27827   |
| VIMSS208834 | DVU3307 | 46581707 | -1.297     | -1.75079   |
| VIMSS208835 | DVU3308 | 46581708 | -0.409155  | -0.447721  |
| VIMSS208836 | DVU3310 | 46581710 | -2.20818   | -2.45102   |
| VIMSS208837 | DVU3311 | 46581711 | -1.31919   | -1.69265   |
| VIMSS208838 | DVU3312 | 46581712 | -0.16603   | -0.177966  |
| VIMSS208839 | DVU3313 | 46581713 | -0.699525  | -0.736992  |
| VIMSS208840 | DVU3314 | 46581714 | 0.681476   | 0.675597   |
| VIMSS208841 | DVU3315 | 46581715 | 0.20369    | 0.380162   |
| VIMSS208842 | DVU3316 | 46581716 | 0.59257    | 0.772411   |
| VIMSS208844 | DVU3318 | 46581718 | -0.827603  | -1.17811   |
| VIMSS208845 | DVU3319 | 46581719 | 1.45436    | 2.56651    |
| VIMSS208846 | DVU3320 | 46581720 | 0.359665   | 0.421872   |
| VIMSS208848 | DVU3322 | 46581722 | 0.211503   | 0.203453   |
| VIMSS208849 | DVU3323 | 46581723 | 0.275588   | 0.418056   |
| VIMSS208850 | DVU3324 | 46581724 | -0.486609  | -0.404653  |
| VIMSS208851 | DVU3325 | 46581725 | 0.571641   | 0.863169   |
| VIMSS208852 | DVU3326 | 46581726 | 1.16448    | 1.21595    |
| VIMSS208855 | DVU3329 | 46581729 | 0.345353   | 0.576467   |
| VIMSS208856 | DVU3330 | 46581730 | -0.116235  | -0.157714  |
| VIMSS208857 | DVU3331 | 46581731 | 0.825145   | 1.03879    |
| VIMSS208858 | DVU3332 | 46581732 | -0.378531  | -0.492686  |
| VIMSS208860 | DVU3334 | 46581734 | -0.301797  | -0.348734  |
| VIMSS208861 | DVU3335 | 46581735 | -0.229808  | -0.360544  |
| VIMSS208862 | DVU3336 | 46581736 | 0.675363   | 0.819699   |
| VIMSS208863 | DVU3337 | 46581737 | 0.340312   | 0.431771   |
| VIMSS208864 | DVU3338 | 46581738 | 0.782062   | 1.05574    |
| VIMSS208868 | DVU3342 | 46581743 | 0.057053   | 0.0840912  |
| VIMSS208869 | DVU3343 | 46581744 | -0.853118  | -1.09462   |
| VIMSS208870 | DVU3344 | 46581745 | 0.518195   | 0.565755   |
| VIMSS208874 | DVU3347 | 46581748 | -1.48195   | -2.34232   |

|             |         |           |            |            |
|-------------|---------|-----------|------------|------------|
| VIMSS208875 | DVU3348 | 304569740 | -2.30449   | -3.01116   |
| VIMSS208876 | DVU3349 | 46581750  | -1.54983   | -1.87275   |
| VIMSS208877 | DVU3350 | 46581751  | -1.53737   | -2.10124   |
| VIMSS208878 | DVU3351 | 46581752  | -0.632901  | -0.869015  |
| VIMSS208879 | DVU3352 | 46581753  | 0.518304   | 0.727764   |
| VIMSS208882 | DVU3355 | 46581756  | 2.1196     | 2.42468    |
| VIMSS208883 | DVU3356 | 46581757  | 0.286188   | 0.374057   |
| VIMSS208884 | DVU3357 | 46581758  | -1.15507   | -0.956398  |
| VIMSS208886 | DVU3359 | 46581760  | -1.22249   | -1.56349   |
| VIMSS208887 | DVU3360 | 46581761  | 0.159142   | 0.232119   |
| VIMSS208888 | DVU3361 | 46581762  | -0.402236  | -0.560568  |
| VIMSS208890 | DVU3363 | 46581764  | 0.504096   | 0.774706   |
| VIMSS208891 | DVU3364 | 46581765  | 0.877142   | 1.46339    |
| VIMSS208892 | DVU3365 | 46581766  | -0.0477611 | -0.0890476 |
| VIMSS208893 | DVU3366 | 46581767  | -0.551731  | -0.819444  |
| VIMSS208894 | DVU3367 | 46581768  | -2.39893   | -3.23175   |
| VIMSS208895 | DVU3368 | 46581769  | -0.785534  | -1.04701   |
| VIMSS208896 | DVU3369 | 46581770  | 0.854531   | 1.04459    |
| VIMSS208898 | DVU3371 | 46581772  | 0.146777   | 0.188215   |
| VIMSS208899 | DVU3372 | 46581773  | 0.247512   | 0.29571    |
| VIMSS208900 | DVU3373 | 46581774  | -0.585124  | -0.871953  |
| VIMSS208901 | DVU3374 | 46581775  | 0.881022   | 1.28141    |
| VIMSS208904 | DVU3376 | 46581777  | 0.0440444  | 0.0498087  |
| VIMSS208907 | DVU3379 | 46581780  | -0.686824  | -0.747275  |
| VIMSS208908 | DVU3380 | 46581781  | -0.923138  | -0.81638   |
| VIMSS208909 | DVU3381 | 46581782  | 1.11209    | 1.60581    |
| VIMSS208910 | DVU3382 | 46581783  | 0.0659279  | 0.0727486  |
| VIMSS208912 | DVU3384 | 46581785  | 2.17971    | 1.57294    |
| VIMSS208914 | DVU3386 | 46581787  | -0.665035  | -0.961636  |
| VIMSS208915 | DVU3387 | 46581788  | 1.4032     | 2.03444    |
| VIMSS208916 | DVU3388 | 46581789  | -0.0133238 | -0.020706  |
| VIMSS208917 | DVU3389 | 46581790  | -1.00715   | -1.7759    |
| VIMSS208921 | DVU3392 | 46581793  | 0.878811   | 1.40001    |
| VIMSS208922 | DVU3393 | 46581794  | 0.250382   | 0.398088   |
| VIMSS208923 | DVU3394 | 46581795  | -0.384393  | -0.348979  |
| VIMSS208924 | DVU3395 | 46581796  | -1.12275   | -1.91489   |
| VIMSS208926 |         | 46578418  | 0.182993   | 0.302721   |
| VIMSS208928 | DVU0002 | 46578419  | -0.544314  | -0.806788  |
| VIMSS208929 | DVU0003 | 46578420  | -0.669291  | -1.21849   |
| VIMSS208931 | DVU0004 | 46578421  | -0.754002  | -1.15672   |
| VIMSS208932 | DVU0005 | 46578422  | 0.0907492  | 0.128303   |
| VIMSS208933 | DVU0006 | 46578423  | 1.43292    | 2.46024    |
| VIMSS208934 | DVU0007 | 46578424  | -0.421515  | -0.663131  |
|             |         |           | -          | -          |
| VIMSS208935 | DVU0008 | 46578425  | 0.00431263 | 0.00470764 |
| VIMSS208936 | DVU0009 | 46578426  | -0.715488  | -0.793272  |
| VIMSS208937 | DVU0010 | 46578427  | 0.262201   | 0.285477   |
| VIMSS208938 | DVU0011 | 46578428  | 0.359179   | 0.597703   |
| VIMSS208939 | DVU0012 | 46578429  | 0.429008   | 0.771101   |



|             |         |          |            |            |
|-------------|---------|----------|------------|------------|
| VIMSS208940 | DVU0013 | 46578430 | -0.116753  | -0.164961  |
| VIMSS208941 | DVU0014 | 46578431 | -3.04106   | -4.23302   |
| VIMSS208942 | DVU0015 | 46578432 | 0.146251   | 0.219363   |
| VIMSS208943 | DVU0016 | 46578433 | 0.598283   | 0.796928   |
| VIMSS208945 | DVU0018 | 46578435 | 0.841005   | 1.36466    |
| VIMSS208946 | DVU0019 | 46578436 | 1.67943    | 2.54203    |
| VIMSS208948 | DVU0020 | 46578437 | 0.31533    | 0.471291   |
| VIMSS208949 |         |          | 0.673696   | 1.10704    |
| VIMSS208950 | DVU0022 | 46578439 | 0.318509   | 0.428497   |
| VIMSS208952 | DVU0024 | 46578441 | -1.43641   | -1.66123   |
| VIMSS208953 | DVU0025 | 46578442 | 0.554055   | 0.704223   |
| VIMSS208954 | DVU0026 | 46578443 | -0.335297  | -0.534539  |
| VIMSS208955 | DVU0027 | 46578444 | 0.785267   | 1.25219    |
| VIMSS208956 | DVU0028 | 46578445 | 1.10217    | 1.66075    |
| VIMSS208957 | DVU0029 | 46578446 | -0.366168  | -0.604898  |
| VIMSS208959 |         |          | 0.32801    | 0.483655   |
| VIMSS208960 | DVU0032 | 46578449 | 0.779505   | 1.10236    |
| VIMSS208961 | DVU0033 | 46578450 | 0.464469   | 0.846234   |
| VIMSS208962 | DVU0034 | 46578451 | 0.256306   | 0.436176   |
| VIMSS208963 | DVU0035 | 46578452 | -0.0837912 | -0.120696  |
| VIMSS208964 | DVU0036 | 46578453 | 0.0339445  | 0.0352102  |
| VIMSS208965 | DVU0037 | 46578454 | 0.457298   | 0.766258   |
| VIMSS208966 | DVU0038 | 46578455 | -0.29492   | -0.452794  |
| VIMSS208967 | DVU0039 | 46578456 | -0.365632  | -0.4151    |
| VIMSS208968 | DVU0040 | 46578457 | -0.81374   | -1.11197   |
| VIMSS208969 | DVU0041 | 46578458 | -0.0428265 | -0.0598896 |
| VIMSS208970 |         |          | 0.24859    | 0.375881   |
| VIMSS208971 | DVU0043 | 46578460 | 0.0848999  | 0.142568   |
| VIMSS208972 | DVU0044 | 46578461 | 0.0258918  | 0.0376711  |
| VIMSS208973 | DVU0045 | 46578462 | 0.455121   | 0.817796   |
| VIMSS208974 | DVU0046 | 46578463 | 0.856125   | 1.59101    |
| VIMSS208975 | DVU0047 | 46578464 | 0.615184   | 1.02096    |
| VIMSS208976 | DVU0048 | 46578465 | 0.524637   | 0.753252   |
| VIMSS208977 | DVU0049 | 46578466 | 1.33868    | 1.99588    |
| VIMSS208978 | DVU0050 | 46578467 | 0.285364   | 0.410711   |
| VIMSS208979 |         |          | 0.418345   | 0.611026   |
| VIMSS208980 | DVU0052 | 46578469 | -0.45036   | -0.680701  |
| VIMSS208981 |         |          | 1.52294    | 2.12646    |
| VIMSS208982 | DVU0054 | 46578471 | -0.0305732 | -0.0438901 |
| VIMSS208983 | DVU0055 | 46578472 | -0.184492  | -0.234913  |
| VIMSS208984 | DVU0056 | 46578473 | 0.908005   | 1.43062    |
| VIMSS208985 | DVU0057 | 46578474 | -0.70135   | -1.1448    |
| VIMSS208986 | DVU0058 | 46578475 | 0.527378   | 0.87065    |
| VIMSS208987 | DVU0059 | 46578476 | -0.539776  | -0.669462  |
| VIMSS208988 | DVU0060 | 46578477 | 0.163859   | 0.257722   |
| VIMSS208989 | DVU0061 | 46578478 | -0.320049  | -0.577048  |
| VIMSS208990 | DVU0062 | 46578479 | 0.158363   | 0.250717   |
| VIMSS208991 | DVU0063 | 46578480 | -0.0800524 | -0.138908  |
| VIMSS208992 | DVU0064 | 46578481 | -0.465994  | -0.688574  |

|             |         |           |           |           |
|-------------|---------|-----------|-----------|-----------|
| VIMSS208993 | DVU0065 | 46578482  | 0.924204  | 1.16458   |
| VIMSS208994 | DVU0066 | 46578483  | 0.22093   | 0.357832  |
| VIMSS208995 | DVU0067 | 46578484  | -0.26494  | -0.415521 |
| VIMSS208996 | DVU0068 | 46578485  | 1.17435   | 1.86004   |
| VIMSS208997 | DVU0069 | 46578486  | 1.05894   | 1.73356   |
| VIMSS208998 | DVU0070 | 46578487  | 0.688263  | 0.617204  |
| VIMSS208999 | DVU0071 | 46578488  | 0.483229  | 0.663668  |
| VIMSS209000 | DVU0072 | 46578489  | 0.135928  | 0.208156  |
| VIMSS209001 | DVU0073 | 46578490  | -0.228832 | -0.384097 |
| VIMSS209002 | DVU0074 | 46578491  | 0.908626  | 1.61523   |
| VIMSS209003 | DVU0075 | 46578492  | 0.505197  | 0.764789  |
| VIMSS209004 | DVU0076 | 304569677 | 0.368918  | 0.65774   |
| VIMSS209005 | DVU0077 | 46578494  | 1.17951   | 1.70601   |
| VIMSS209006 | DVU0078 | 46578495  | 0.482944  | 0.583444  |
| VIMSS209007 | DVU0079 | 46578496  | 1.05129   | 1.59314   |
| VIMSS209008 | DVU0080 | 46578497  | 0.492382  | 0.834198  |
| VIMSS209009 | DVU0081 | 46578498  | 1.5435    | 2.16243   |
| VIMSS209010 | DVU0082 | 46578499  | 0.434615  | 0.439286  |
| VIMSS209011 | DVU0083 | 46578500  | -0.559538 | -0.8536   |
| VIMSS209012 | DVU0084 | 46578501  | -0.174719 | -0.208704 |
| VIMSS209013 | DVU0085 | 46578502  | -0.565333 | -0.901575 |
| VIMSS209016 | DVU0087 | 46578504  | -0.536531 | -0.750296 |
| VIMSS209017 | DVU0088 | 46578505  | -2.91732  | -2.91599  |
| VIMSS209018 | DVU0089 | 46578506  | -0.394807 | -0.371973 |
| VIMSS209019 | DVU0090 | 46578507  | -0.629257 | -0.804561 |
| VIMSS209020 | DVU0091 | 46578508  | 0.0482186 | 0.0816245 |
| VIMSS209021 | DVU0092 | 46578509  | -0.393303 | -0.59793  |
| VIMSS209022 | DVU0093 | 46578510  | -0.598342 | -0.820148 |
| VIMSS209023 | DVU0094 | 46578511  | -1.04715  | -1.48105  |
| VIMSS209024 | DVU0095 | 46578512  | -0.60851  | -0.950074 |
| VIMSS209025 | DVU0096 | 46578513  | -0.386244 | -0.390915 |
| VIMSS209026 | DVU0097 | 46578514  | -0.119778 | -0.170961 |
| VIMSS209027 | DVU0098 | 46578515  | 0.169412  | 0.242901  |
| VIMSS209028 | DVU0099 | 46578516  | -1.38129  | -1.7491   |
| VIMSS209029 | DVU0100 | 46578517  | -0.361103 | -0.333362 |
| VIMSS209030 | DVU0101 | 46578518  | -0.226897 | -0.312044 |
| VIMSS209031 | DVU0102 | 46578519  | 0.463585  | 0.610795  |
| VIMSS209032 | DVU0103 | 46578520  | -2.31724  | -2.54701  |
| VIMSS209033 | DVU0104 | 46578521  | -1.15545  | -1.33234  |
| VIMSS209035 | DVU0105 | 46578522  | 0.178076  | 0.269382  |
| VIMSS209036 | DVU0106 | 46578523  | 0.246227  | 0.398249  |
| VIMSS209037 | DVU0107 | 46578524  | 0.117983  | 0.219454  |
| VIMSS209038 | DVU0108 | 46578525  | 1.69543   | 2.85187   |
| VIMSS209039 |         |           | -0.469893 | -0.730959 |
| VIMSS209040 | DVU0110 | 46578527  | -0.11193  | -0.162343 |
| VIMSS209041 | DVU0111 | 46578528  | -0.497579 | -0.547291 |
| VIMSS209042 | DVU0112 | 46578529  | -0.260072 | -0.357667 |
| VIMSS209043 | DVU0113 | 46578530  | -1.17446  | -1.96534  |
| VIMSS209044 | DVU0114 | 46578531  | -1.81562  | -2.30011  |

|             |         |          |            |            |
|-------------|---------|----------|------------|------------|
| VIMSS209045 | DVU0115 | 46578532 | -0.603932  | -0.795936  |
| VIMSS209046 | DVU0116 | 46578533 | -0.912287  | -1.24877   |
| VIMSS209047 | DVU0117 | 46578534 | -0.226989  | -0.271982  |
| VIMSS209048 | DVU0118 | 46578535 | 1.0998     | 1.48492    |
| VIMSS209049 | DVU0119 | 46578536 | 0.453622   | 0.74225    |
| VIMSS209050 | DVU0120 | 46578537 | 0.933806   | 1.21256    |
| VIMSS209051 | DVU0121 | 46578538 | 1.06066    | 1.78145    |
| VIMSS209052 | DVU0122 | 46578539 | 0.489058   | 0.674733   |
| VIMSS209053 | DVU0123 | 46578540 | -0.450735  | -0.547203  |
| VIMSS209054 | DVU0124 | 46578541 | -4.04217   | -4.81348   |
| VIMSS209055 | DVU0125 | 46578542 | 0.97418    | 1.44052    |
| VIMSS209056 | DVU0126 | 46578543 | -1.78493   | -2.01832   |
| VIMSS209057 | DVU0127 | 46578544 | 0.451039   | 0.663054   |
| VIMSS209058 | DVU0128 | 46578545 | 0.852954   | 1.22187    |
| VIMSS209059 | DVU0129 | 46578546 | 0.214842   | 0.319814   |
| VIMSS209060 | DVU0130 | 46578547 | 0.785244   | 1.13074    |
| VIMSS209063 | DVU0132 | 46578549 | -0.260018  | -0.394837  |
| VIMSS209065 | DVU0133 | 46578550 | -0.792102  | -1.22362   |
| VIMSS209066 | DVU0134 | 46578551 | -1.12773   | -1.76568   |
| VIMSS209067 | DVU0136 | 46578553 | -1.2026    | -1.55094   |
| VIMSS209068 | DVU0135 | 46578552 | -0.713926  | -1.23012   |
| VIMSS209070 | DVU0138 | 46578555 | 2.32329    | 4.2551     |
| VIMSS209071 | DVU0139 | 46578556 | -0.653832  | -0.812902  |
| VIMSS209072 | DVU0140 | 46578557 | 0.782029   | 1.17343    |
| VIMSS209073 | DVU0141 | 46578558 | -0.768004  | -1.27941   |
| VIMSS209074 | DVU0142 | 46578559 | -0.727455  | -1.15046   |
| VIMSS209075 | DVU0143 | 46578560 | -0.038122  | -0.0578928 |
| VIMSS209076 | DVU0144 | 46578561 | 0.41414    | 0.587766   |
| VIMSS209077 | DVU0145 | 46578562 | 0.956483   | 1.6184     |
| VIMSS209078 | DVU0146 | 46578563 | -0.80756   | -1.24781   |
| VIMSS209079 | DVU0147 | 46578564 | -0.108618  | -0.142069  |
| VIMSS209080 | DVU0148 | 46578565 | 0.599576   | 1.0185     |
| VIMSS209081 | DVU0149 | 46578566 | 1.15125    | 1.71302    |
| VIMSS209082 | DVU0150 | 46578567 | -0.55163   | -0.802209  |
| VIMSS209084 | DVU0152 | 46578569 | 0.582843   | 1.00367    |
| VIMSS209085 | DVU0153 | 46578570 | 0.141371   | 0.239025   |
| VIMSS209087 | DVU0155 | 46578572 | 0.654252   | 0.995661   |
| VIMSS209088 | DVU0156 | 46578573 | 1.46731    | 2.45462    |
| VIMSS209089 | DVU0157 | 46578574 | 0.198676   | 0.343473   |
| VIMSS209090 | DVU0158 | 46578575 | -0.221384  | -0.263531  |
| VIMSS209091 | DVU0159 | 46578576 | -0.790295  | -1.08432   |
| VIMSS209092 | DVU0160 | 46578577 | -0.0258381 | -0.0458344 |
| VIMSS209093 | DVU0161 | 46578578 | -1.25985   | -1.6421    |
| VIMSS209094 | DVU0162 | 46578579 | -1.38319   | -2.25742   |
| VIMSS209096 | DVU0163 | 46578580 | -1.36813   | -1.59544   |
| VIMSS209097 | DVU0164 | 46578581 | 0.971413   | 1.38797    |
| VIMSS209098 | DVU0165 | 46578582 | -1.68226   | -2.14411   |
| VIMSS209099 | DVU0166 | 46578583 | -1.27621   | -2.0284    |
| VIMSS209100 | DVU0167 | 46578584 | -1.18535   | -1.79674   |

|             |         |           |            |           |
|-------------|---------|-----------|------------|-----------|
| VIMSS209101 | DVU0168 | 46578585  | -0.98815   | -1.62512  |
| VIMSS209102 | DVU0169 | 46578586  | 0.964086   | 1.04784   |
| VIMSS209103 | DVU0170 | 46578587  | 2.02252    | 2.57891   |
| VIMSS209105 | DVU0172 | 46578589  | 2.79087    | 5.24064   |
| VIMSS209106 |         |           | 1.63933    | 3.11831   |
| VIMSS209107 | DVU0174 | 46578591  | 1.23041    | 1.86605   |
| VIMSS209108 | DVU0175 | 46578592  | 0.213742   | 0.34573   |
| VIMSS209109 | DVU0176 | 46578593  | 0.798928   | 1.3448    |
| VIMSS209110 | DVU0177 | 46578594  | 0.657028   | 0.952095  |
| VIMSS209112 | DVU0179 | 304569678 | 0.463304   | 0.770709  |
| VIMSS209113 | DVU0180 | 46578597  | 0.190567   | 0.216325  |
| VIMSS209114 | DVU0181 | 46578598  | 0.673154   | 0.804838  |
| VIMSS209115 | DVU0182 | 46578599  | -0.117848  | -0.191821 |
| VIMSS209116 | DVU0183 | 46578600  | -0.508006  | -0.538443 |
| VIMSS209117 | DVU0184 | 46578601  | -1.84223   | -1.96754  |
| VIMSS209118 | DVU0185 | 46578602  | -0.0973711 | -0.131227 |
| VIMSS209119 | DVU0186 | 46578603  | 1.68455    | 2.42052   |
| VIMSS209120 | DVU0187 | 46578604  | 0.0306443  | 0.0447469 |
| VIMSS209122 | DVU0189 | 46578606  | -0.263852  | -0.360572 |
| VIMSS209123 | DVU0190 | 46578607  | -1.06797   | -1.05692  |
| VIMSS209124 | DVU0191 | 46578608  | 0.475254   | 0.661186  |
| VIMSS209125 | DVU0192 | 46578609  | 0.099672   | 0.111465  |
| VIMSS209126 | DVU0193 | 46578610  | 0.183461   | 0.0931278 |
| VIMSS209127 | DVU0194 | 46578611  | -0.876623  | -1.11917  |
| VIMSS209128 | DVU0195 | 46578612  | -0.210021  | -0.254677 |
| VIMSS209129 |         |           | -0.446968  | -0.699587 |
| VIMSS209130 | DVU0197 | 46578614  | -0.267617  | -0.396509 |
| VIMSS209131 | DVU0198 | 46578615  | -1.06931   | -1.28148  |
| VIMSS209132 | DVU0199 | 46578616  | -0.877044  | -1.43153  |
| VIMSS209133 | DVU0200 | 46578617  | -1.15667   | -2.0051   |
| VIMSS209134 | DVU0201 | 46578618  | -0.71416   | -1.18235  |
| VIMSS209135 | DVU0202 | 46578619  | -0.987337  | -1.35975  |
| VIMSS209136 | DVU0203 | 46578620  | -1.22773   | -1.74147  |
| VIMSS209137 | DVU0204 | 46578621  | -0.474731  | -0.675539 |
| VIMSS209138 | DVU0205 | 46578622  | -0.20992   | -0.268723 |
| VIMSS209139 | DVU0206 | 46578623  | -0.25507   | -0.371147 |
| VIMSS209140 | DVU0207 | 46578624  | -0.237313  | -0.330145 |
| VIMSS209141 | DVU0208 | 46578625  | -0.806108  | -1.15911  |
| VIMSS209142 | DVU0209 | 46578626  | -0.207378  | -0.334639 |
| VIMSS209143 | DVU0210 | 46578627  | -0.959611  | -1.22429  |
| VIMSS209144 | DVU0211 | 46578628  | 0.833114   | 1.47911   |
| VIMSS209145 | DVU0212 | 46578629  | -0.165796  | -0.255644 |
| VIMSS209146 | DVU0213 | 46578630  | -1.26771   | -1.81053  |
| VIMSS209147 | DVU0214 | 46578631  | 1.45909    | 1.94762   |
| VIMSS209148 | DVU0215 | 46578632  | 0.904225   | 1.28122   |
| VIMSS209149 | DVU0216 | 46578633  | 0.0196528  | 0.0248622 |
| VIMSS209150 | DVU0217 | 46578634  | -0.421658  | -0.578917 |
| VIMSS209151 | DVU0218 | 46578635  | 0.808185   | 1.30012   |
| VIMSS209152 | DVU0219 | 46578636  | -0.449138  | -0.697086 |

|             |         |           |           |           |
|-------------|---------|-----------|-----------|-----------|
| VIMSS209153 | DVU0220 | 46578637  | -0.30916  | -0.433594 |
| VIMSS209154 | DVU0221 | 46578638  | -0.970941 | -1.38424  |
| VIMSS209155 | DVU0222 | 46578639  | 0.32138   | 0.443667  |
| VIMSS209156 | DVU0223 | 46578640  | -0.878163 | -1.58896  |
| VIMSS209157 | DVU0224 | 46578641  | 0.0401522 | 0.0654575 |
| VIMSS209159 | DVU0226 | 46578643  | 0.142447  | 0.229758  |
| VIMSS209160 | DVU0227 | 46578644  | -0.654971 | -0.892852 |
| VIMSS209163 | DVU0230 | 46578647  | 0.463009  | 0.619958  |
| VIMSS209164 | DVU0231 | 46578648  | 0.564509  | 0.846092  |
| VIMSS209165 | DVU0232 | 46578649  | -1.39252  | -1.66588  |
| VIMSS209167 | DVU0234 | 46578651  | 0.170263  | 0.245497  |
| VIMSS209168 | DVU0235 | 46578652  | -0.189895 | -0.284372 |
| VIMSS209169 | DVU0236 | 46578653  | -0.44264  | -0.473551 |
| VIMSS209170 | DVU0237 | 46578654  | -0.491587 | -0.739728 |
| VIMSS209171 | DVU0238 | 46578655  | 0.38997   | 0.669565  |
| VIMSS209173 |         |           | 1.70614   | 2.25918   |
| VIMSS209174 | DVU0241 | 46578658  | 0.157059  | 0.266711  |
| VIMSS209175 | DVU0242 | 46578659  | 1.25448   | 1.8882    |
| VIMSS209176 | DVU0243 | 46578660  | 0.543686  | 0.799034  |
| VIMSS209177 | DVU0244 | 46578661  | -0.103918 | -0.174637 |
| VIMSS209178 | DVU0245 | 46578662  | 0.577804  | 0.723044  |
| VIMSS209179 | DVU0246 | 46578663  | 1.1097    | 1.4324    |
| VIMSS209180 | DVU0247 | 46578664  | -0.268717 | -0.447864 |
| VIMSS209182 | DVU0249 | 46578665  | -0.378528 | -0.490429 |
| VIMSS209183 | DVU0250 | 46578666  | 1.39158   | 2.52439   |
| VIMSS209185 | DVU0252 | 46578668  | -0.426368 | -0.779705 |
| VIMSS209186 | DVU0253 | 46578669  | 1.04217   | 1.65708   |
| VIMSS209188 | DVU0255 | 46578671  | 0.173829  | 0.297845  |
| VIMSS209189 | DVU0256 | 46578672  | 0.0831585 | 0.134377  |
| VIMSS209191 | DVU0257 | 46578673  | -0.970536 | -1.17204  |
| VIMSS209192 | DVU0258 | 46578674  | -0.206239 | -0.253936 |
| VIMSS209193 | DVU0259 | 46578675  | 0.451586  | 0.79571   |
| VIMSS209194 | DVU0260 | 46578676  | 0.332169  | 0.484606  |
| VIMSS209195 | DVU0261 | 46578677  | 1.11578   | 1.65414   |
| VIMSS209196 | DVU0262 | 46578678  | 0.215014  | 0.264387  |
| VIMSS209197 | DVU0263 | 46578679  | -0.149931 | -0.238161 |
| VIMSS209198 | DVU0264 | 46578680  | 0.197641  | 0.317675  |
| VIMSS209199 | DVU0265 | 46578681  | 0.179575  | 0.263327  |
| VIMSS209200 | DVU0266 | 304569679 | 1.22128   | 1.81762   |
| VIMSS209203 | DVU0269 | 46578685  | -0.621846 | -1.03045  |
| VIMSS209204 | DVU0270 | 46578686  | 0.471311  | 0.750653  |
| VIMSS209205 | DVU0271 | 46578687  | 0.525039  | 0.933429  |
| VIMSS209206 | DVU0272 | 46578688  | 0.606629  | 0.748899  |
| VIMSS209207 | DVU0273 | 46578689  | -0.124125 | -0.121059 |
| VIMSS209208 | DVU0274 | 46578690  | -1.05286  | -1.59757  |
| VIMSS209209 | DVU0275 | 46578691  | 1.48987   | 2.51274   |
| VIMSS209210 | DVU0276 | 46578692  | 2.55017   | 3.94891   |
| VIMSS209211 | DVU0277 | 46578693  | -0.058431 | -0.108042 |
| VIMSS209212 | DVU0278 | 46578694  | 0.689761  | 0.936168  |

|             |         |           |            |            |
|-------------|---------|-----------|------------|------------|
| VIMSS209213 | DVU0279 | 46578695  | -2.03795   | -3.12032   |
| VIMSS209214 | DVU0280 | 46578696  | -0.0866738 | -0.140379  |
| VIMSS209215 |         |           | 0.813143   | 1.44194    |
| VIMSS209216 | DVU0282 | 46578698  | -0.565565  | -0.996264  |
| VIMSS209217 | DVU0284 | 304569680 | -1.08069   | -1.81491   |
| VIMSS209218 |         |           | -0.073875  | -0.0749713 |
| VIMSS209219 | DVU0285 | 46578701  | -1.08979   | -1.78941   |
| VIMSS209220 | DVU0286 | 46578702  | 0.108811   | 0.174486   |
| VIMSS209223 | DVU0289 |           | -0.128862  | -0.213656  |
| VIMSS209224 | DVU0290 | 46578706  | 0.569822   | 0.891006   |
| VIMSS209225 | DVU0291 | 46578707  | 0.323689   | 0.460343   |
| VIMSS209226 | DVU0293 | 46578709  | -0.810056  | -1.2609    |
| VIMSS209227 | DVU0292 | 46578708  | -0.508547  | -0.781325  |
| VIMSS209228 |         |           | 0.850675   | 1.25356    |
| VIMSS209229 | DVU0295 | 46578711  | 0.491257   | 0.832317   |
| VIMSS209230 | DVU0296 | 46578712  | -0.518389  | -0.786775  |
| VIMSS209231 |         |           | -0.469408  | -0.654842  |
| VIMSS209232 | DVU0298 | 46578714  | 0.727045   | 1.04708    |
| VIMSS209233 | DVU0299 | 46578715  | 0.25319    | 0.401106   |
| VIMSS209234 | DVU0300 | 46578716  | 0.380097   | 0.504345   |
| VIMSS209236 | DVU0302 | 46578718  | 0.0708721  | 0.121084   |
| VIMSS209237 | DVU0303 | 46578719  | -0.531555  | -0.346686  |
| VIMSS209238 | DVU0304 | 46578720  | -1.78438   | -2.10988   |
| VIMSS209239 | DVU0305 | 46578721  | 1.59392    | 2.33318    |
| VIMSS209240 | DVU0306 | 46578722  | -0.0512419 | -0.0938025 |
| VIMSS209241 | DVU0307 | 46578723  | -0.289785  | -0.337852  |
| VIMSS209242 | DVU0308 | 46578724  | -2.00652   | -2.90508   |
| VIMSS209243 | DVU0309 | 46578725  | -0.88921   | -0.93679   |
| VIMSS209244 | DVU0310 | 46578726  | 0.03031    | 0.0422655  |
| VIMSS209245 | DVU0311 | 46578727  | 0.65052    | 1.0753     |
| VIMSS209246 | DVU0312 | 46578728  | 0.0746287  | 0.11627    |
| VIMSS209247 | DVU0313 | 46578729  | 0.203382   | 0.325762   |
| VIMSS209248 | DVU0314 | 46578730  | 0.475141   | 0.76338    |
| VIMSS209249 | DVU0315 | 46578731  | 0.20761    | 0.262505   |
| VIMSS209250 | DVU0316 | 46578732  | 0.435314   | 0.650165   |
| VIMSS209252 | DVU0318 | 46578734  | -0.977981  | -1.46264   |
| VIMSS209253 | DVU0319 | 46578735  | -1.30693   | -1.72147   |
| VIMSS209254 | DVU0320 | 46578736  | 0.487938   | 0.476568   |
| VIMSS209255 | DVU0321 | 46578737  | 0.457546   | 0.797053   |
| VIMSS209256 | DVU0322 | 46578738  | -0.661525  | -0.820384  |
| VIMSS209257 | DVU0323 | 46578739  | -1.33055   | -1.64615   |
| VIMSS209259 | DVU0325 | 46578741  | -0.269883  | -0.324746  |
| VIMSS209260 | DVU0326 | 46578742  | 0.00894479 | 0.0134704  |
| VIMSS209261 | DVU0327 | 46578743  | 0.495621   | 0.788806   |
| VIMSS209262 | DVU0328 | 46578744  | 0.390937   | 0.711402   |
| VIMSS209264 | DVU0330 | 46578746  | 1.21578    | 1.48446    |
| VIMSS209265 | DVU0331 | 46578747  | 0.825661   | 0.929997   |
| VIMSS209267 | DVU0333 | 46578749  | -0.246655  | -0.413575  |
| VIMSS209268 | DVU0334 | 46578750  | -0.305569  | -0.442068  |

|             |         |          |            |            |
|-------------|---------|----------|------------|------------|
| VIMSS209269 | DVU0335 | 46578751 | -1.05301   | -1.32145   |
| VIMSS209270 | DVU0336 | 46578752 | -0.624087  | -0.950997  |
| VIMSS209271 | DVU0337 | 46578753 | -0.0562908 | -0.0802194 |
| VIMSS209272 | DVU0339 | 46578755 | -0.543493  | -0.977972  |
| VIMSS209273 | DVU0338 | 46578754 | -0.46564   | -0.780951  |
| VIMSS209274 | DVU0340 | 46578756 | 0.0963538  | 0.15854    |
| VIMSS209275 | DVU0341 | 46578757 | -0.247323  | -0.38155   |
| VIMSS209276 | DVU0342 | 46578758 | 0.0629097  | 0.102624   |
| VIMSS209277 | DVU0343 | 46578759 | 0.254877   | 0.35293    |
| VIMSS209278 |         |          | 0.800598   | 1.20382    |
| VIMSS209280 | DVU0346 | 46578762 | -0.729082  | -0.783327  |
| VIMSS209281 | DVU0347 | 46578763 | 0.328875   | 0.448158   |
| VIMSS209282 | DVU0348 | 46578764 | -0.598625  | -0.945809  |
| VIMSS209283 | DVU0349 | 46578765 | -0.629007  | -0.759506  |
| VIMSS209284 | DVU0350 | 46578766 | -0.465779  | -0.622471  |
| VIMSS209285 | DVU0351 | 46578767 | 0.575561   | 0.781101   |
| VIMSS209286 | DVU0352 | 46578768 | -0.545796  | -0.893883  |
| VIMSS209287 | DVU0353 | 46578769 | -0.123029  | -0.189003  |
| VIMSS209288 |         |          | 1.33715    | 2.16479    |
| VIMSS209289 | DVU0355 | 46578771 | 1.03095    | 1.80323    |
| VIMSS209290 | DVU0356 | 46578772 | 0.283996   | 0.464136   |
| VIMSS209291 | DVU0357 | 46578773 | 0.346539   | 0.496518   |
| VIMSS209292 | DVU0358 | 46578774 | 0.135205   | 0.166679   |
| VIMSS209293 | DVU0359 | 46578775 | -0.691493  | -0.837867  |
| VIMSS209294 | DVU0360 | 46578776 | 1.54251    | 2.09197    |
| VIMSS209295 | DVU0361 | 46578777 | 1.59416    | 2.31172    |
| VIMSS209296 | DVU0362 | 46578778 | -0.910199  | -1.03285   |
| VIMSS209297 |         |          | -0.743303  | -0.58622   |
| VIMSS209298 | DVU0364 | 46578780 | 0.48101    | 0.864996   |
| VIMSS209299 | DVU0365 | 46578781 | 1.32839    | 1.53512    |
| VIMSS209301 | DVU0367 | 46578783 | 0.138855   | 0.171768   |
| VIMSS209302 | DVU0368 | 46578784 | -1.88272   | -2.29423   |
| VIMSS209304 | DVU0369 | 46578785 | 0.0805803  | 0.0641183  |
| VIMSS209305 | DVU0370 | 46578786 | -1.12617   | -1.20742   |
| VIMSS209306 | DVU0371 | 46578787 | -1.92753   | -2.61654   |
| VIMSS209307 | DVU0372 | 46578788 | -2.61993   | -2.65149   |
| VIMSS209308 | DVU0373 | 46578789 | 0.217243   | 0.283701   |
| VIMSS209309 | DVU0374 | 46578790 | -0.504646  | -0.633005  |
| VIMSS209310 | DVU0375 | 46578791 | 1.47167    | 2.46977    |
| VIMSS209311 | DVU0376 | 46578792 | 0.0670453  | 0.0745031  |
| VIMSS209312 | DVU0377 | 46578793 | 0.204032   | 0.291041   |
| VIMSS209313 | DVU0378 | 46578794 | -1.89303   | -1.79656   |
| VIMSS209314 | DVU0379 | 46578795 | -0.126091  | -0.203227  |
| VIMSS209315 | DVU0380 | 46578796 | 0.195955   | 0.257708   |
| VIMSS209317 | DVU0381 | 46578797 | -2.52639   | -1.70582   |
| VIMSS209318 | DVU0382 | 46578798 | 1.23679    | 0.599939   |
| VIMSS209319 | DVU0383 | 46578799 | 0.540322   | 0.769722   |
| VIMSS209320 | DVU0384 | 46578800 | -1.14864   | -1.7128    |
| VIMSS209322 | DVU0386 | 46578802 | -0.192128  | -0.262063  |

|             |         |          |            |            |
|-------------|---------|----------|------------|------------|
| VIMSS209323 | DVU0387 | 46578803 | -0.717996  | -0.626881  |
| VIMSS209324 | DVU0388 | 46578804 | -1.29088   | -2.0671    |
| VIMSS209325 | DVU0389 | 46578805 | -1.06446   | -1.57339   |
| VIMSS209326 | DVU0390 | 46578806 | -0.837452  | -1.23658   |
| VIMSS209327 | DVU0391 | 46578807 | -0.0155477 | -0.0188716 |
| VIMSS209328 | DVU0392 | 46578808 | 0.0309483  | 0.0438058  |
| VIMSS209329 |         |          | -0.432172  | -0.578527  |
| VIMSS209330 | DVU0394 | 46578810 | -1.28135   | -1.70063   |
| VIMSS209331 | DVU0395 | 46578811 | 0.208404   | 0.2877     |
| VIMSS209332 | DVU0396 | 46578812 | -0.726853  | -1.25529   |
| VIMSS209333 | DVU0397 | 46578813 | -0.618848  | -0.809555  |
| VIMSS209334 | DVU0398 | 46578814 | -1.24096   | -1.92857   |
| VIMSS209335 | DVU0399 | 46578815 | -2.12374   | -2.71001   |
| VIMSS209336 | DVU0400 | 46578816 | -1.49285   | -1.62316   |
| VIMSS209338 | DVU0402 | 46578818 | -0.100639  | -0.106776  |
| VIMSS209339 | DVU0403 | 46578819 | -0.576846  | -0.663828  |
| VIMSS209340 | DVU0404 | 46578820 | -1.07941   | -1.32261   |
| VIMSS209341 | DVU0405 | 46578821 | -0.809617  | -1.00963   |
| VIMSS209342 | DVU0406 | 46578822 | -1.53101   | -1.92488   |
| VIMSS209344 | DVU0408 | 46578824 | 0.266703   | 0.49426    |
| VIMSS209345 | DVU0409 | 46578825 | -0.283701  | -0.363604  |
| VIMSS209346 | DVU0410 | 46578826 | -0.778556  | -1.14099   |
| VIMSS209347 | DVU0411 | 46578827 | 2.18022    | 3.13972    |
| VIMSS209348 | DVU0412 | 46578828 | 0.305094   | 0.518927   |
| VIMSS209349 | DVU0413 | 46578829 | 1.10186    | 1.75847    |
| VIMSS209350 | DVU0414 | 46578830 | -1.22111   | -1.71274   |
| VIMSS209351 | DVU0415 | 46578831 | -1.33428   | -1.8924    |
| VIMSS209352 | DVU0416 | 46578832 | 0.895597   | 1.38504    |
| VIMSS209353 | DVU0417 | 46578833 | -1.0087    | -1.71689   |
| VIMSS209354 | DVU0418 | 46578834 | -0.16895   | -0.267995  |
| VIMSS209355 | DVU0419 | 46578835 | 2.06105    | 3.29159    |
| VIMSS209356 | DVU0420 | 46578836 | 0.659247   | 0.690537   |
| VIMSS209358 | DVU0422 | 46578838 | 0.498281   | 0.506578   |
| VIMSS209359 | DVU0423 | 46578839 | 2.86358    | 4.95298    |
| VIMSS209360 | DVU0424 | 46578840 | -0.0412713 | -0.0557086 |
| VIMSS209361 | DVU0425 | 46578841 | 0.805623   | 0.971775   |
| VIMSS209364 | DVU0428 | 46578844 | -0.623307  | -0.990041  |
| VIMSS209365 | DVU0429 | 46578845 | 1.77725    | 2.54013    |
| VIMSS209367 | DVU0431 | 46578847 | 2.44361    | 2.62286    |
| VIMSS209368 | DVU0432 | 46578848 | 3.15518    | 4.27305    |
| VIMSS209369 | DVU0433 | 46578849 | 2.79888    | 3.3626     |
| VIMSS209370 | DVU0434 | 46578850 | 1.90586    | 2.98123    |
| VIMSS209372 |         |          | 1.17443    | 1.45736    |
| VIMSS209373 | DVU0437 | 46578853 | 0.770793   | 1.17008    |
| VIMSS209374 | DVU0438 | 46578854 | 0.595763   | 0.973753   |
| VIMSS209375 | DVU0439 | 46578855 | -0.115872  | -0.171012  |
| VIMSS209376 | DVU0440 | 46578856 | 0.270995   | 0.317375   |
| VIMSS209377 | DVU0441 | 46578857 | 1.29965    | 2.02347    |
| VIMSS209378 | DVU0442 | 46578858 | 0.57976    | 0.61468    |



|             |         |           |            |            |
|-------------|---------|-----------|------------|------------|
| VIMSS209379 | DVU0443 | 46578859  | 2.88303    | 4.59608    |
| VIMSS209380 | DVU0444 | 46578860  | 1.1978     | 1.57731    |
| VIMSS209381 | DVU0445 | 46578861  | -0.0526134 | -0.0673782 |
| VIMSS209382 | DVU0446 | 46578862  | -0.497008  | -0.461386  |
| VIMSS209383 | DVU0447 | 46578863  | 0.109206   | 0.118518   |
| VIMSS209384 | DVU0448 | 46578864  | 0.617961   | 1.1345     |
| VIMSS209386 | DVU0450 | 46578866  | 0.266311   | 0.442154   |
| VIMSS209387 | DVU0451 | 46578867  | 0.293559   | 0.418348   |
| VIMSS209388 |         |           | -0.528452  | -0.767219  |
| VIMSS209389 | DVU0453 | 304569684 | 1.33874    | 2.0234     |
| VIMSS209390 | DVU0454 | 46578870  | 0.389397   | 0.686996   |
| VIMSS209391 | DVU0455 | 46578871  | 0.84562    | 1.23445    |
| VIMSS209392 | DVU0456 | 46578872  | 0.559475   | 0.931603   |
| VIMSS209393 | DVU0457 | 46578873  | -0.0086564 | -0.0115253 |
| VIMSS209394 | DVU0458 | 46578874  | -1.33099   | -1.27185   |
| VIMSS209395 | DVU0459 | 46578875  | -2.17968   | -2.94289   |
| VIMSS209396 | DVU0460 | 46578876  | -1.17713   | -1.87599   |
| VIMSS209397 | DVU0461 | 46578877  | -1.31441   | -2.26739   |
| VIMSS209398 | DVU0462 | 46578878  | -0.713342  | -1.14153   |
| VIMSS209399 | DVU0463 | 46578879  | -0.0627859 | -0.112138  |
| VIMSS209400 | DVU0464 | 46578880  | -0.586938  | -0.923396  |
| VIMSS209401 | DVU0465 | 46578881  | -1.16153   | -1.53877   |
| VIMSS209402 | DVU0466 | 46578882  | -0.9568    | -1.24173   |
| VIMSS209403 | DVU0467 | 46578883  | -0.011699  | -0.0156225 |
| VIMSS209404 | DVU0468 | 46578884  | -1.00078   | -1.46329   |
| VIMSS209405 | DVU0469 | 46578885  | -0.95664   | -0.948975  |
| VIMSS209406 | DVU0470 | 46578886  | -1.54854   | -2.37529   |
| VIMSS209407 | DVU0471 | 46578887  | -0.846149  | -1.34717   |
| VIMSS209411 | DVU0475 | 46578891  | -0.903374  | -1.19873   |
| VIMSS209413 | DVU0477 | 46578893  | -0.360247  | -0.532062  |
| VIMSS209414 | DVU0478 | 46578894  | 1.24535    | 1.57297    |
| VIMSS209415 | DVU0479 | 46578895  | 0.416855   | 0.48864    |
| VIMSS209416 | DVU0480 | 46578896  | -0.0802579 | -0.128729  |
| VIMSS209417 | DVU0481 | 46578897  | -0.205887  | -0.376566  |
| VIMSS209418 | DVU0482 | 46578898  | 2.27439    | 3.73699    |
| VIMSS209420 | DVU0484 | 46578900  | 1.5236     | 1.95989    |
| VIMSS209421 | DVU0485 | 46578901  | -0.403024  | -0.632544  |
| VIMSS209423 | DVU0487 | 46578903  | -0.137802  | -0.215806  |
| VIMSS209425 | DVU0489 | 46578905  | -0.0230254 | -0.0383345 |
| VIMSS209428 | DVU0491 | 46578906  | 0.641198   | 0.925172   |
| VIMSS209429 | DVU0492 | 46578907  | 0.505479   | 0.795748   |
| VIMSS209430 | DVU0493 | 46578908  | -0.126376  | -0.189846  |
| VIMSS209431 | DVU0494 | 46578909  | -0.192898  | -0.269505  |
| VIMSS209432 | DVU0495 | 46578910  | 0.120296   | 0.197379   |
| VIMSS209433 | DVU0496 | 46578911  | 0.597985   | 0.934831   |
| VIMSS209434 | DVU0497 | 46578912  | 1.06184    | 0.998703   |
| VIMSS209435 | DVU0498 | 46578913  | 0.612168   | 0.89918    |
| VIMSS209436 | DVU0499 | 46578914  | 0.530134   | 0.711066   |
| VIMSS209437 | DVU0500 | 46578915  | 0.375545   | 0.59441    |

|             |         |          |            |            |
|-------------|---------|----------|------------|------------|
| VIMSS209438 | DVU0501 | 46578916 | -1.3567    | -2.22618   |
| VIMSS209439 |         |          | -0.920672  | -1.3415    |
| VIMSS209440 | DVU0503 | 46578918 | -1.76274   | -1.77477   |
| VIMSS209441 | DVU0504 | 46578919 | -2.5202    | -3.53144   |
| VIMSS209442 | DVU0505 | 46578920 | 0.489753   | 0.75829    |
| VIMSS209443 | DVU0506 | 46578921 | -0.341303  | -0.516686  |
| VIMSS209445 | DVU0507 | 46578922 | -1.04761   | -1.1579    |
| VIMSS209446 | DVU0508 | 46578923 | -1.09852   | -1.34019   |
| VIMSS209448 | DVU0510 | 46578925 | -1.55983   | -1.76809   |
| VIMSS209449 | DVU0511 | 46578926 | -1.17334   | -1.9746    |
| VIMSS209450 | DVU0512 | 46578927 | -0.431769  | -0.60809   |
| VIMSS209451 | DVU0513 | 46578928 | 0.0018208  | 0.00313372 |
| VIMSS209452 | DVU0514 | 46578929 | 0.0751847  | 0.112959   |
| VIMSS209453 | DVU0515 | 46578930 | 1.27002    | 2.19135    |
| VIMSS209455 | DVU0517 | 46578932 | 1.17785    | 1.74778    |
| VIMSS209456 | DVU0518 | 46578933 | -0.522191  | -0.969487  |
| VIMSS209457 | DVU0519 | 46578934 | -0.662674  | -1.08573   |
| VIMSS209458 | DVU0520 | 46578935 | -0.368876  | -0.430248  |
| VIMSS209459 | DVU0521 | 46578936 | 0.451311   | 0.642412   |
| VIMSS209461 | DVU0522 | 46578937 | -0.217666  | -0.311325  |
| VIMSS209463 | DVU0524 | 46578939 | 1.17684    | 2.15441    |
| VIMSS209465 | DVU0526 | 46578941 | 0.546098   | 0.664339   |
| VIMSS209466 | DVU0527 | 46578942 | 1.17715    | 1.62192    |
| VIMSS209467 | DVU0528 | 46578943 | 0.855846   | 0.951804   |
| VIMSS209468 | DVU0529 | 46578944 | 0.0686882  | 0.0928487  |
| VIMSS209469 | DVU0530 | 46578945 | -0.480248  | -0.560664  |
| VIMSS209470 | DVU0531 | 46578946 | 0.483665   | 0.638655   |
| VIMSS209471 | DVU0532 | 46578947 | 0.0691403  | 0.0786479  |
| VIMSS209472 | DVU0533 | 46578948 | -0.0886638 | -0.107591  |
| VIMSS209473 | DVU0534 | 46578949 | -1.85246   | -1.61747   |
| VIMSS209475 | DVU0536 | 46578951 | -0.396062  | -0.504854  |
| VIMSS209477 | DVU0538 | 46578953 | 0.168136   | 0.215696   |
| VIMSS209478 | DVU0539 | 46578954 | 0.144691   | 0.207011   |
| VIMSS209479 | DVU0540 | 46578955 | 0.756342   | 1.07806    |
| VIMSS209481 | DVU0542 | 46578957 | -0.171897  | -0.219655  |
| VIMSS209482 | DVU0543 | 46578958 | 1.00609    | 1.01186    |
| VIMSS209483 | DVU0544 | 46578959 | -0.755318  | -0.9011    |
| VIMSS209484 | DVU0545 | 46578960 | 0.738299   | 1.01105    |
| VIMSS209486 | DVU0547 | 46578962 | -0.368168  | -0.545808  |
| VIMSS209487 | DVU0548 | 46578963 | -1.17532   | -1.58386   |
| VIMSS209488 | DVU0549 | 46578964 | -1.06503   | -1.56343   |
| VIMSS209489 | DVU0550 | 46578965 | -0.751495  | -1.03842   |
| VIMSS209490 | DVU0551 | 46578966 | -0.577659  | -0.966907  |
| VIMSS209496 | DVU0555 | 46578970 | -2.94414   | -3.3658    |
| VIMSS209497 | DVU0556 | 46578971 | -1.43686   | -2.07252   |
| VIMSS209498 | DVU0557 |          | -1.70229   | -2.88618   |
| VIMSS209502 | DVU0561 | 46578975 | -2.10314   | -3.24371   |
| VIMSS209503 | DVU0562 | 46578976 | -2.82595   | -4.92421   |
| VIMSS209504 | DVU0563 | 46578977 | -2.32882   | -4.02127   |

|             |         |          |            |            |
|-------------|---------|----------|------------|------------|
| VIMSS209506 | DVU0565 | 46578979 | 2.13584    | 3.63755    |
| VIMSS209507 | DVU0566 | 46578980 | 1.28322    | 2.36093    |
| VIMSS209508 | DVU0567 | 46578981 | -0.0782076 | -0.112129  |
| VIMSS209510 | DVU0568 | 46578982 | 0.213681   | 0.253055   |
| VIMSS209511 | DVU0569 | 46578983 | -0.260625  | -0.394757  |
| VIMSS209512 | DVU0570 | 46578984 | 0.323875   | 0.389592   |
| VIMSS209513 | DVU0571 | 46578985 | 0.972989   | 1.51923    |
| VIMSS209514 | DVU0572 | 46578986 | 0.906854   | 1.57679    |
| VIMSS209516 | DVU0573 | 46578987 | 1.33988    | 2.37548    |
| VIMSS209518 | DVU0575 | 46578989 | 0.680045   | 1.07265    |
| VIMSS209519 | DVU0576 | 46578990 | 2.32675    | 4.23962    |
| VIMSS209520 | DVU0577 | 46578991 | 1.52068    | 2.15748    |
| VIMSS209522 | DVU0579 | 46578993 | 0.851825   | 1.18946    |
| VIMSS209523 | DVU0580 | 46578994 | 2.35159    | 4.33405    |
| VIMSS209524 | DVU0581 | 46578995 | 1.31933    | 2.01895    |
| VIMSS209525 | DVU0582 | 46578996 | 1.63245    | 2.95679    |
| VIMSS209527 |         |          | 1.21466    | 2.1796     |
| VIMSS209528 | DVU0585 | 46578999 | -0.898105  | -0.971712  |
| VIMSS209529 | DVU0586 | 46579000 | 4.81649    | 6.99623    |
| VIMSS209532 | DVU0588 | 46579002 | 3.25426    | 4.99522    |
| VIMSS209534 |         |          | 0.139865   | 0.144659   |
| VIMSS209535 | DVU0591 | 46579005 | 1.34486    | 2.49686    |
| VIMSS209536 | DVU0592 | 46579006 | 1.33598    | 2.20024    |
|             |         |          | -          | -          |
| VIMSS209537 | DVU0593 | 46579007 | 0.00591326 | 0.00640109 |
| VIMSS209538 | DVU0594 | 46579008 | 1.20023    | 2.04243    |
| VIMSS209539 | DVU0595 | 46579009 | 1.56499    | 2.9848     |
| VIMSS209540 | DVU0596 | 46579010 | 1.03031    | 1.64562    |
| VIMSS209541 | DVU0597 | 46579011 | 0.716246   | 1.16199    |
| VIMSS209542 | DVU0598 | 46579012 | 3.48868    | 3.48879    |
| VIMSS209543 | DVU0599 | 46579013 | 2.72416    | 3.67995    |
| VIMSS209544 | DVU0600 | 46579014 | 0.878375   | 1.07215    |
| VIMSS209545 | DVU0601 | 46579015 | 0.799001   | 1.13699    |
| VIMSS209546 | DVU0602 | 46579016 | 1.17404    | 2.17716    |
| VIMSS209547 | DVU0603 | 46579017 | 1.32562    | 2.02087    |
| VIMSS209549 | DVU0605 | 46579019 | 0.501461   | 0.397251   |
| VIMSS209550 | DVU0606 | 46579020 | -0.2314    | -0.371515  |
| VIMSS209552 | DVU0608 | 46579022 | 2.00618    | 3.33535    |
| VIMSS209555 | DVU0611 | 46579025 | 0.81797    | 1.13992    |
| VIMSS209556 |         |          | 2.12393    | 3.2519     |
| VIMSS209561 | DVU0616 | 46579030 | -0.0452346 | -0.0633194 |
| VIMSS209562 | DVU0617 | 46579031 | 0.136729   | 0.180166   |
| VIMSS209564 | DVU0618 | 46579032 | -0.991094  | -0.999748  |
| VIMSS209565 | DVU0619 | 46579033 | 0.346627   | 0.504639   |
| VIMSS209566 | DVU0620 | 46579034 | 1.16881    | 1.77158    |
| VIMSS209567 | DVU0621 | 46579035 | 0.258788   | 0.303018   |
| VIMSS209568 | DVU0622 | 46579036 | 0.0794962  | 0.12865    |
| VIMSS209570 | DVU0624 | 46579038 | 0.957427   | 1.58377    |
| VIMSS209571 | DVU0625 | 46579039 | 1.61936    | 2.6137     |

|             |          |          |            |            |
|-------------|----------|----------|------------|------------|
| VIMSS209572 | DVU0626  | 46579040 | 0.686729   | 1.22305    |
| VIMSS209573 | DVU0627  | 46579041 | 0.466841   | 0.677698   |
| VIMSS209574 | DVU0628  | 46579042 | 1.42701    | 2.42069    |
| VIMSS209575 | DVU0629  | 46579043 | 0.331006   | 0.462359   |
| VIMSS209576 | DVU0630  | 46579044 | 0.774912   | 1.32807    |
| VIMSS209577 | DVU0631  | 46579045 | 0.77963    | 1.32761    |
| VIMSS209578 | DVU0632  | 46579046 | -0.252131  | -0.398949  |
| VIMSS209579 | DVU0633  | 46579047 | 0.473183   | 0.726284   |
| VIMSS209580 | DVU0634  | 46579048 | 1.50762    | 2.64924    |
| VIMSS209582 | DVU0636  | 46579050 | 1.53542    | 2.32269    |
| VIMSS209583 | DVU0637  | 46579051 | -0.268111  | -0.356849  |
| VIMSS209584 | DVU0638  | 46579052 | 1.17171    | 1.99409    |
| VIMSS209585 | DVU0639  | 46579053 | 0.622861   | 1.05852    |
| VIMSS209587 | DVU0641  | 46579055 | 0.595338   | 0.941918   |
| VIMSS209588 | DVU0642  | 46579056 | 0.161099   | 0.270048   |
|             |          |          | -          |            |
| VIMSS209589 |          |          | 0.00770574 | -0.0105225 |
| VIMSS209592 | DVUA0132 | 46562130 | 0.808531   | 1.52578    |
| VIMSS209594 | DVUA0131 | 46562131 | 2.84543    | 4.19403    |
| VIMSS209607 | DVUA0116 | 46562143 | 0.124789   | 0.146809   |
| VIMSS209609 | DVUA0114 | 46562145 | 0.397409   | 0.460871   |
| VIMSS209612 | DVUA0111 | 46562148 | 0.0770927  | 0.103363   |
| VIMSS209624 | DVUA0097 | 46562160 | 1.92004    | 2.60679    |
| VIMSS209629 | DVUA0091 | 46562165 | 3.91191    | 3.6569     |
| VIMSS209643 | DVUA0076 | 46562176 | -0.336367  | -0.470852  |
| VIMSS209644 | DVUA0075 | 46562177 | -1.84563   | -2.39555   |
| VIMSS209646 | DVUA0074 | 46562178 | -0.816927  | -0.544087  |
| VIMSS209647 | DVUA0073 | 46562179 | -0.134253  | -0.199113  |
| VIMSS209650 | DVUA0070 | 46562182 | 0.215179   | 0.232973   |
| VIMSS209652 | DVUA0069 | 46562183 | 1.05319    | 1.43482    |
| VIMSS209686 | DVUA0036 | 46562211 | 0.690487   | 0.98728    |
| VIMSS209692 | DVUA0030 | 46562217 | 3.06491    | 3.01353    |
| VIMSS209694 | DVUA0028 | 46562219 | 2.20566    | 2.35395    |
| VIMSS209700 | DVUA0023 | 46562224 | 1.48393    | 1.76625    |
| VIMSS209704 | DVUA0020 | 46562227 | -1.12801   | -1.09844   |
| VIMSS209705 | DVUA0019 | 46562228 | 0.854639   | 0.892537   |
| VIMSS209717 | DVUA0006 | 46562240 | 0.136286   | 0.187412   |
| VIMSS209719 | DVUA0003 | 46562242 | 1.01804    | 0.953485   |
| VIMSS209727 | DVUA0147 | 46562249 | 0.26261    | 0.246496   |
| VIMSS209731 | DVUA0141 | 46562253 | 2.15499    | 1.83314    |
| VIMSS209737 | DVUA0135 | 46562258 | 0.602653   | 1.0307     |
| VIMSS408305 | DVU1112  | 46579525 | 0.713655   | 0.980037   |
| VIMSS408306 | DVU1127  | 46579540 | 2.22894    | 2.25566    |
| VIMSS408312 | DVU1290  | 46579701 | 1.02006    | 1.48172    |
| VIMSS408317 |          |          | 0.0415176  | 0.0392431  |
| VIMSS408318 |          |          | -0.218626  | -0.212028  |
| VIMSS408321 | DVU1485  | 46579896 | -0.372566  | -0.552609  |
| VIMSS408322 | DVU1486  | 46579897 | 1.11015    | 1.54663    |
| VIMSS408323 | DVU1487  | 46579898 | 1.8093     | 1.97986    |

|             |         |          |           |           |
|-------------|---------|----------|-----------|-----------|
| VIMSS408326 | DVU1495 | 46579906 | 1.514     | 1.60594   |
| VIMSS408327 | DVU1496 | 46579907 | 2.43616   | 2.43033   |
| VIMSS408328 | DVU1497 | 46579908 | 0.705951  | 0.751227  |
| VIMSS408329 | DVU1510 | 46579921 | -0.119161 | -0.196473 |
| VIMSS408330 | DVU1511 | 46579922 | 0.993157  | 1.13121   |
| VIMSS408331 |         |          | -0.798825 | -1.20034  |
| VIMSS408352 | DVU2174 | 46580579 | -2.49893  | -4.07739  |
