# Supplementary material for: Transcriptomic and proteomic analyses of Desulfovibrio vulgaris biofilms: Carbon and energy flow contribute to the distinct biofilm growth state
Source: PubMed Central journal article supplement (PMC3431258; doi:10.1186/1471-2164-13-138), 2012-04-16
Supplement: 1471-2164-13-138-S4.pdf [file 1471-2164-13-138-S4.pdf]

| Systematic_Name | LocusID | Log_Ratio  | Biofilm vs. Reactor | Planktonic | Z_Score |
|-----------------|---------|------------|---------------------|------------|---------|
| DVU0646         | 206065  | -0.815643  |                     | -1.4852    |         |
| DVU0647         | 206066  | -0.339293  |                     | -0.499856  |         |
| DVU0648         | 206067  | -0.878017  |                     | -1.29022   |         |
| DVU0649         | 206069  | -0.356352  |                     | -0.607528  |         |
| DVU0650         | 206070  | -0.605423  |                     | -0.902032  |         |
| DVU0651         | 206071  | -0.850364  |                     | -1.35787   |         |
| DVU0652         | 206072  | 0.747784   |                     | 1.27723    |         |
| DVU0653         | 206074  | -0.521212  |                     | -1.00515   |         |
| DVU0654         | 206075  | -0.21437   |                     | -0.396491  |         |
| DVU0655         | 206076  | 0.0406761  |                     | 0.0757331  |         |
| VIMSS206077     | 206077  | -0.0750986 |                     | -0.138052  |         |
| DVU0656         | 206078  | 0.00374359 |                     | 0.00709161 |         |
| DVU0657         | 206079  | -0.68162   |                     | -1.25067   |         |
| DVU0659         | 206081  | 0.391295   |                     | 0.762787   |         |
| VIMSS206082     | 206082  | 0.18909    |                     | 0.306542   |         |
| DVU0660         | 206083  | -0.118134  |                     | -0.218163  |         |
| DVU0661         | 206084  | 0.330414   |                     | 0.59695    |         |
| DVU0662         | 206085  | 0.226507   |                     | 0.431604   |         |
| DVU0663         | 206086  | 0.967311   |                     | 1.8331     |         |
| DVU0664         | 206087  | 0.0294189  |                     | 0.0540912  |         |
| DVU0665         | 206088  | 1.19737    | 2.18045             |            |         |
| DVU0666         | 206089  | -0.0199644 |                     | -0.033141  |         |
| DVU0667         | 206090  | -0.103349  |                     | -0.18833   |         |
| DVU0668         | 206091  | -0.431293  |                     | -0.652047  |         |
| DVU0669         | 206092  | -0.226359  |                     | -0.431413  |         |
| DVU0670         | 206093  | 0.63229    | 0                   |            |         |
| DVU0671         | 206094  | -1.76641   |                     | -3.14671   |         |
| DVU0672         | 206095  | 1.91506    | 2.12813             |            |         |
| DVU0674         | 206098  | 0.169817   |                     | 0.31904    |         |
| DVU0676         | 206100  | 0.621267   |                     | 1.15128    |         |
| DVU0677         | 206101  | 0.776917   |                     | 1.43082    |         |
| VIMSS206102     | 206102  | -0.0288718 |                     | -0.0480486 |         |
| DVU0679         | 206103  | 0.00585334 |                     | 0.00876795 |         |
| DVU0680         | 206104  | -0.409953  |                     | -0.664233  |         |
| DVU0681         | 206105  | 0.355897   |                     | 0.6129     |         |
| DVU0682         | 206106  | -0.398573  |                     | -0.69868   |         |
| DVU0683         | 206107  | 0.858155   |                     | 1.61964    |         |
| DVU0684         | 206108  | 0.324922   |                     | 0.590276   |         |
| DVU0685         | 206109  | 0.531883   |                     | 0.972099   |         |
| DVU0686         | 206110  | 0.973273   |                     | 1.63356    |         |
| DVU0687         | 206111  | 0.226682   |                     | 0.398462   |         |
| DVU0688         | 206112  | 0.135176   |                     | 0.223756   |         |
| DVU0689         | 206113  | 0.201506   |                     | 0.364417   |         |
| DVU0690         | 206114  | -0.226207  |                     | -0.434333  |         |
| DVU0691         | 206115  | 0.326493   |                     | 0.559478   |         |
| DVU0692         | 206116  | -0.827795  |                     | -1.59697   |         |
| DVU0693         | 206117  | -0.796819  |                     | -1.37573   |         |
| DVU0694         | 206118  | -0.899687  |                     | -1.3084    |         |
| VIMSS206119     | 206119  | -0.838219  |                     | -1.17167   |         |
| VIMSS206120     | 206120  | -0.021033  |                     | -0.0363483 |         |
| DVU0697         | 206121  | 0.360628   |                     | 0.689685   |         |
| DVU0698         | 206122  | -0.188784  |                     | -0.348297  |         |
| VIMSS206123     | 206123  | -0.341994  |                     | -0.652312  |         |
| DVU0699         | 206124  | -0.330912  |                     | -0.60606   |         |
| DVU0700         | 206125  | 0.655068   |                     | 1.16469    |         |
| DVU0701         | 206126  | 0.634307   |                     | 1.21106    |         |
| DVU0702         | 206127  | -0.132072  |                     | -0.220817  |         |
| DVU0703         | 206128  | -0.776221  |                     | -1.24827   |         |
| DVU0704         | 206129  | -0.499602  |                     | -0.969887  |         |
| DVU0706         | 206130  | -0.130018  |                     | -0.197469  |         |
| DVU0705         | 206131  | -0.112797  |                     | -0.156004  |         |
| DVU0707         | 206132  | 0.341608   |                     | 0.656252   |         |
| VIMSS206133     | 206133  | 0.334404   |                     | 0.489319   |         |
| VIMSS206134     | 206134  | 0.0696518  |                     | 0.119006   |         |
| DVU0710         | 206135  | 0.522376   |                     | 0.518665   |         |
| DVU0711         | 206136  | -0.608922  |                     | -1.08729   |         |
| DVU0712         | 206137  | 0.794407   |                     | 1.30832    |         |
| DVU0713         | 206138  | -0.716273  |                     | -1.32759   |         |
| DVU0714         | 206139  | -0.434145  |                     | -0.801706  |         |
| DVU0715         | 206140  | -0.412372  |                     | -0.690565  |         |
| DVU0716         | 206141  | -1.66459   |                     | -2.90893   |         |

|             |        |             |             |
|-------------|--------|-------------|-------------|
| DVU0717     | 206142 | 0.318955    | 0.524578    |
| DVU0720     | 206145 | 0.950652    | 1.72088     |
| DVU0721     | 206146 | 0.399829    | 0.696165    |
| DVU0722     | 206147 | 0.164665    | 0.259069    |
| VIMSS206148 | 206148 | -0.916297   | -1.48195    |
| DVU0723     | 206149 | -1.06543    | -1.81051    |
| DVU0724     | 206150 | -1.70762    | -3.07516    |
| DVU0725     | 206151 | 1.17929     | 2.31665     |
| DVU0726     | 206152 | -0.566464   | -1.01318    |
| DVU0727     | 206153 | 0.382828    | 0.687776    |
| DVU0728     | 206154 | 0.799191    | 1.34854     |
| DVU0729     | 206155 | 2.07207     | 4.05212     |
| DVU0730     | 206156 | -0.324077   | -0.588656   |
| DVU0731     | 206157 | 0.477004    | 0.791412    |
| DVU0732     | 206158 | -1.15264    | -1.98032    |
| DVU0733     | 206159 | -0.286542   | -0.514758   |
| DVU0734     | 206160 | -0.824422   | -1.42075    |
| DVU0735     | 206161 | 0.142492    | 0.252923    |
| DVU0736     | 206162 | -0.127026   | -0.221575   |
| DVU0737     | 206163 | -0.00115679 | -0.00213216 |
| DVU0738     | 206164 | 0.474212    | 0.892045    |
| DVU0739     | 206165 | 0.529251    | 0.848123    |
| DVU0740     | 206166 | -0.0858672  | -0.147809   |
| DVU0741     | 206167 | 0.668166    | 1.29811     |
| DVU0742     | 206168 | 0.792122    | 1.42288     |
| DVU0743     | 206169 | -0.192355   | -0.346861   |
| DVU0744     | 206170 | -0.335254   | -0.621187   |
| DVU0745     | 206171 | -0.410128   | -0.741695   |
| DVU0746     | 206172 | -1.43836    | -2.26623    |
| DVU0747     | 206173 | -0.464286   | -0.756149   |
| DVU0749     | 206175 | 0.0814519   | 0.152055    |
| DVU0750     | 206176 | 0.0418466   | 0.0661956   |
| DVU0751     | 206177 | 0.386693    | 0.750794    |
| DVU0752     | 206178 | 0.00402871  | 0.00718712  |
| DVU0753     | 206179 | 0.0443022   | 0.0844714   |
| DVU0754     | 206180 | 1.00883     | 1.87218     |
| DVU0755     | 206181 | 1.03919     | 1.85966     |
| DVU0756     | 206182 | 0.244151    | 0.395259    |
| DVU0757     | 206183 | -0.237013   | -0.411316   |
| DVU0758     | 206184 | 0.304976    | 0.490835    |
| DVU0759     | 206185 | 0.147104    | 0.252558    |
| DVU0760     | 206186 | -0.231424   | -0.424361   |
| DVU0761     | 206187 | -0.0136245  | -0.0263837  |
| DVU0762     | 206188 | 0.060876    | 0.11936     |
| DVU0763     | 206189 | 0.0518783   | 0.0956952   |
| DVU0764     | 206190 | -2.15381    | -3.86314    |
| DVU0765     | 206191 | -0.432193   | -0.803731   |
| VIMSS206192 | 206192 | 1.49067     | 2.47938     |
| DVU0766     | 206193 | 0.949009    | 1.82856     |
| DVU0767     | 206194 | -1.01948    | -1.83883    |
| DVU0768     | 206195 | -0.565916   | -1.03044    |
| DVU0769     | 206196 | -0.688381   | -1.13566    |
| DVU0770     | 206197 | 0.382114    | 0.614883    |
| DVU0771     | 206198 | 0.167704    | 0.268032    |
| DVU0772     | 206199 | 0.820398    | 1.19457     |
| DVU0773     | 206200 | 2.05169     | 3.74908     |
| DVU0774     | 206201 | -0.992573   | -1.63033    |
| DVU0775     | 206202 | -0.833528   | -1.20988    |
| DVU0776     | 206203 | -0.645054   | -0.83247    |
| DVU0777     | 206204 | -1.13269    | -1.4052     |
| DVU0778     | 206205 | -0.31641    | -0.48609    |
| DVU0779     | 206206 | -0.492227   | -0.754511   |
| DVU0780     | 206207 | -1.50457    | -2.43569    |
| VIMSS206208 | 206208 | -0.988684   | -1.24567    |
| VIMSS206209 | 206209 | -0.883753   | -1.266      |
| VIMSS206210 | 206210 | -0.869222   | -1.23109    |
| DVU0784     | 206211 | -0.670883   | -1.17864    |
| DVU0785     | 206212 | -0.454962   | -0.850147   |
| DVU0786     | 206213 | -0.397119   | -0.693663   |
| DVU0787     | 206214 | -0.337848   | -0.647907   |
| DVU0788     | 206215 | -0.776838   | -1.43736    |
| DVU0789     | 206216 | -0.0598656  | -0.109225   |

|             |        |             |             |
|-------------|--------|-------------|-------------|
| DVU0790     | 206217 | 0.181738    | 0           |
| DVU0791     | 206218 | 0.459802    | 0.868742    |
| DVU0792     | 206219 | -0.355687   | -0.638196   |
| DVU0793     | 206220 | -1.38327    | -2.51976    |
| DVU0794     | 206221 | -0.467365   | -0.857693   |
| DVU0795     | 206222 | -1.04549    | -1.43058    |
| DVU0796     | 206223 | -0.535761   | -0.991246   |
| DVU0798     | 206224 | -0.427656   | -0.545864   |
| VIMSS206226 | 206226 | 0.0341473   | 0.0473444   |
| DVU0801     | 206227 | 0.311801    | 0.52526     |
| DVU0802     | 206228 | -0.0577485  | -0.101839   |
| DVU0803     | 206229 | 0.227256    | 0.417378    |
| DVU0804     | 206230 | -0.07262    | -0.107289   |
| DVU0805     | 206231 | 0.22252     | 0.417436    |
| DVU0806     | 206232 | -0.0580421  | -0.110225   |
| DVU0807     | 206233 | -0.653702   | -1.19349    |
| DVU0808     | 206234 | -0.978549   | -1.66462    |
| DVU0809     | 206235 | -0.467881   | -0.837003   |
| DVU0810     | 206236 | -0.236951   | -0.436318   |
| VIMSS206237 | 206237 | -0.213011   | -0.267478   |
| DVU0811     | 206238 | 0.452366    | 0.822348    |
| DVU0812     | 206239 | 0.12903     | 0.230732    |
| DVU0813     | 206240 | 0.356389    | 0.638829    |
| DVU0814     | 206241 | -0.122242   | -0.228853   |
| DVU0815     | 206242 | 0.29615     | 0.559459    |
| DVU0816     | 206243 | -0.316578   | -0.507882   |
| DVU0817     | 206244 | -0.271689   | -0.513158   |
| DVU0818     | 206245 | -0.404202   | -0.691871   |
| DVU0819     | 206246 | 1.14567     | 2.05699     |
| VIMSS206247 | 206247 | -0.398641   | -0.448539   |
| DVU0821     | 206248 | 0.733819    | 1.24582     |
| DVU0822     | 206249 | 0.600095    | 1.08003     |
| DVU0823     | 206250 | -0.28959    | -0.463848   |
| VIMSS206251 | 206251 | 0.59048     | 0.791886    |
| DVU0825     | 206252 | 0.0910175   | 0.170098    |
| DVU0826     | 206253 | -0.440455   | -0.704457   |
| DVU0827     | 206254 | -1.36036    | -2.62967    |
| DVU0828     | 206256 | -0.00574312 | -0.00908451 |
| DVU0829     | 206257 | -0.215244   | -0.405224   |
| DVU0830     | 206258 | -0.537921   | -1.02618    |
| DVU0831     | 206259 | -0.229616   | -0.437018   |
| DVU0832     | 206260 | -0.5321     | -1.03089    |
| DVU0834     | 206261 | -0.810832   | -1.08743    |
| DVU0835     | 206262 | -0.735994   | -1.31231    |
| DVU0836     | 206263 | -1.20755    | -2.16747    |
| DVU0837     | 206264 | 0.488742    | 0.933319    |
| DVU0838     | 206265 | 0.793012    | 1.42781     |
| DVU0839     | 206266 | 0.151122    | 0.282529    |
| DVU0840     | 206267 | -0.701535   | -1.34707    |
| DVU0841     | 206268 | -0.974301   | -1.79735    |
| DVU0842     | 206269 | -0.28111    | -0.505329   |
| DVU0843     | 206270 | -0.112522   | -0.197588   |
| VIMSS206271 | 206271 | 0.140536    | 0           |
| VIMSS206273 | 206273 | -0.858517   | -1.20558    |
| DVU0847     | 206274 | -0.855404   | -1.19108    |
| DVU0848     | 206275 | -0.904976   | -1.41703    |
| DVU0849     | 206276 | -1.21909    | -1.9254     |
| DVU0850     | 206277 | -1.19249    | -1.71392    |
| DVU0852     | 206279 | -0.245868   | -0.278944   |
| DVU0853     | 206280 | 0.705076    | 1.28708     |
| DVU0854     | 206281 | -0.287783   | -0.539115   |
| DVU0855     | 206282 | -0.177053   | -0.331441   |
| DVU0856     | 206283 | -0.76483    | -1.41264    |
| VIMSS206284 | 206284 | 0.434415    | 0.77617     |
| DVU0857     | 206285 | 0.218498    | 0.403906    |
| DVU0858     | 206286 | 0.549865    | 0.820499    |
| DVU0859     | 206287 | 0.190553    | 0.31475     |
| VIMSS206288 | 206288 | -0.0853759  | -0.129448   |
| DVU0861     | 206289 | -0.0224845  | -0.0338379  |
| DVU0862     | 206290 | -0.0341508  | -0.0552106  |
| DVU0863     | 206291 | 0.0728798   | 0.131508    |
| DVU0864     | 206292 | -0.949691   | -1.71113    |

|             |        |             |             |
|-------------|--------|-------------|-------------|
| DVU0865     | 206293 | -0.641723   | -1.16217    |
| DVU0866     | 206294 | -0.0495209  | -0.0935959  |
| DVU0867     | 206295 | -0.695866   | -1.22513    |
| DVU0868     | 206296 | 0.00691825  | 0.0119219   |
| DVU0869     | 206297 | -0.742624   | -1.36389    |
| DVU0870     | 206298 | 0.420647    | 0.821621    |
| DVU0871     | 206299 | -0.607484   | -1.15535    |
| DVU0872     | 206300 | -0.350979   | -0.655154   |
| DVU0873     | 206301 | -1.29004    | -2.02344    |
| DVU0874     | 206302 | -1.47371    | -2.49877    |
| DVU0875     | 206303 | -0.0271406  | -0.0484355  |
| DVU0876     | 206304 | -0.0457078  | -0.0862308  |
| VIMSS206305 | 206305 | -0.5244     | -0.643197   |
| DVU0878     | 206306 | 1.2897      | 2.34808     |
| VIMSS206307 | 206307 | -0.624262   | -1.10739    |
| DVU0880     | 206308 | -0.850443   | -1.50706    |
| DVU0881     | 206309 | 0.825075    | 1.50819     |
| DVU0882     | 206310 | 0.484096    | 0.793249    |
| DVU0883     | 206311 | 0.789586    | 1.4981      |
| DVU0884     | 206312 | 0.667222    | 1.12987     |
| DVU0885     | 206313 | -0.929228   | -1.75403    |
| DVU0886     | 206314 | -0.755685   | -1.31723    |
| DVU0888     | 206316 | 0.26939     | 0.467291    |
| DVU0890     | 206318 | -0.8919     | -1.59162    |
| DVU0891     | 206319 | -1.11683    | -1.90378    |
| DVU0892     | 206320 | 0.599028    | 1.02851     |
| DVU0893     | 206321 | 0.500385    | 0.974045    |
| DVU0895     | 206323 | -1.05686    | -1.95398    |
| DVU0896     | 206324 | -1.01644    | -1.88983    |
| DVU0897     | 206325 | 0.164787    | 0.275399    |
| DVU0899     | 206327 | -0.00389033 | -0.00758116 |
| DVU0900     | 206328 | -0.334396   | -0.600354   |
| DVU0901     | 206329 | -0.352066   | -0.485196   |
| DVU0902     | 206330 | -0.0962643  | -0.178126   |
| DVU0903     | 206331 | 0.165237    | 0.295648    |
| DVU0904     | 206332 | -0.492608   | -0.688259   |
| DVU0905     | 206333 | -0.161541   | -0.270261   |
| DVU0906     | 206334 | 0.0236068   | 0.0339055   |
| DVU0907     | 206335 | -0.0804063  | -0.148145   |
| DVU0908     | 206336 | -0.38329    | -0.687257   |
| DVU0909     | 206337 | 0.657458    | 0           |
| DVU0910     | 206338 | 0.228411    | 0.439294    |
| DVU0911     | 206339 | -0.697423   | -1.22817    |
| DVU0912     | 206340 | 0.277782    | 0.528328    |
| DVU0913     | 206341 | 0.721255    | 1.3252      |
| VIMSS206342 | 206342 | 0.109838    | 0.173112    |
| DVU0914     | 206343 | 0.110284    | 0.195323    |
| DVU0915     | 206344 | -0.0242343  | -0.0435925  |
| DVU0916     | 206345 | -0.111184   | -0.213444   |
| VIMSS206346 | 206346 | -0.0736335  | -0.14383    |
| DVU0918     | 206348 | -0.247913   | -0.446488   |
| DVU0919     | 206349 | 0.209315    | 0.391743    |
| DVU0920     | 206350 | -0.00590538 | -0.00993368 |
| DVU0921     | 206351 | 0.0960505   | 0.119687    |
| DVU0922     | 206352 | -0.172856   | -0.303646   |
| DVU0923     | 206353 | -0.320506   | -0.481779   |
| DVU0924     | 206355 | -0.774086   | -1.3494     |
| DVU0925     | 206356 | -0.449352   | -0.778876   |
| DVU0926     | 206357 | -0.226899   | -0.359072   |
| DVU0927     | 206358 | -1.26556    | -2.25267    |
| DVU0928     | 206359 | -1.00742    | -1.81696    |
| DVU0929     | 206360 | -0.111682   | -0.190229   |
| DVU0930     | 206361 | -0.250851   | -0.42795    |
| DVU0931     | 206362 | -0.545575   | -1.0216     |
| DVU0932     | 206363 | -0.555999   | -1.02073    |
| DVU0933     | 206364 | -0.270991   | -0.456535   |
| DVU0934     | 206365 | -0.0720692  | -0.111909   |
| DVU0935     | 206366 | 1.14242     | 1.94608     |
| DVU0936     | 206367 | -0.803848   | -1.44273    |
| DVU0937     | 206368 | -0.161459   | -0.25168    |
| DVU0938     | 206369 | 1.33543     | 2.42456     |
| DVU0939     | 206370 | 1.83106     | 3.56998     |

|             |        |             |             |
|-------------|--------|-------------|-------------|
| DVU0940     | 206371 | 0.486211    | 0.868672    |
| VIMSS206372 | 206372 | 0.471096    | 0.778503    |
| DVU0941     | 206373 | 0.818457    | 1.5193      |
| DVU0942     | 206374 | 0.290348    | 0.532773    |
| DVU0943     | 206375 | 1.29947     | 1.85512     |
| DVU0944     | 206376 | 1.46603     | 2.39974     |
| DVU0945     | 206377 | 0.592544    | 1.09149     |
| DVU0946     | 206378 | -0.0416895  | -0.0803055  |
| DVU0947     | 206379 | -0.818195   | -1.3811     |
| DVU0948     | 206380 | 0.0681599   | 0.0966022   |
| DVU0949     | 206381 | -0.249576   | -0.351844   |
| VIMSS206382 | 206382 | -1.12394    | -1.35701    |
| DVU0951     | 206383 | -0.108968   | -0.209072   |
| DVU0952     | 206384 | -0.878793   | -1.6079     |
| DVU0953     | 206385 | -0.816945   | -1.45663    |
| DVU0954     | 206386 | -0.914004   | 0           |
| DVU0955     | 206387 | 0.890158    | 1.57258     |
| DVU0956     | 206388 | -1.42045    | -2.47868    |
| DVU0957     | 206389 | -0.876082   | -1.5555     |
| DVU0958     | 206390 | -1.24758    | -2.26137    |
| DVU0959     | 206391 | -0.989818   | -1.58642    |
| VIMSS206392 | 206392 | -0.532583   | -0.960489   |
| DVU0961     | 206393 | 0.76853     | 1.43477     |
| VIMSS206394 | 206394 | -0.503187   | -0.64344    |
| DVU0963     | 206395 | 0.832886    | 1.53177     |
| DVU0966     | 206398 | -1.26784    | -2.19941    |
| DVU0967     | 206399 | -1.36597    | -2.42725    |
| DVU0968     | 206400 | -1.09463    | -1.8524     |
| DVU0969     | 206401 | 0.104228    | 0.186728    |
| DVU0970     | 206402 | 0.0398646   | 0.0672401   |
| DVU0971     | 206403 | 0.111033    | 0.203557    |
| DVU0972     | 206404 | -0.23456    | -0.366118   |
| DVU0973     | 206405 | -1.13437    | -1.88324    |
| DVU0974     | 206406 | 0.314997    | 0.561252    |
| DVU0975     | 206407 | 0.0396178   | 0.0727337   |
| DVU0976     | 206408 | 0.00244318  | 0.00425403  |
| VIMSS206409 | 206409 | 0.234423    | 0.282973    |
| DVU0978     | 206410 | 0.0625967   | 0.101031    |
| DVU0979     | 206411 | 1.11751     | 2.17235     |
| DVU0980     | 206412 | 0.727556    | 1.35486     |
| DVU0981     | 206413 | 0.617978    | 1.06828     |
| DVU0982     | 206414 | -0.164454   | -0.297972   |
| DVU0983     | 206415 | 0.0149001   | 0.0280125   |
| DVU0984     | 206416 | 0.149085    | 0.271679    |
| VIMSS206417 | 206417 | -0.157313   | -0.256065   |
| DVU0987     | 206418 | 0.933039    | 1.63739     |
| VIMSS206419 | 206419 | 0.688245    | 1.15488     |
| DVU0988     | 206420 | -0.0477501  | -0.0878722  |
| DVU0989     | 206421 | 0.0866699   | 0.164235    |
| DVU0990     | 206422 | -1.07335    | -1.94538    |
| DVU0991     | 206423 | -0.785773   | -1.39915    |
| DVU0992     | 206424 | 0.428975    | 0.762688    |
| DVU0993     | 206425 | 0.227565    | 0.419491    |
| DVU0994     | 206426 | -0.639783   | -1.11112    |
| DVU0995     | 206427 | 0.281781    | 0.534134    |
| DVU0996     | 206428 | 0.0633564   | 0.11117     |
| DVU0997     | 206429 | -0.490982   | -0.941392   |
| DVU0998     | 206430 | -0.505489   | -0.927975   |
| VIMSS206432 | 206432 | -0.944866   | -1.33569    |
| DVU0999     | 206433 | 0.584111    | 0.985764    |
| DVU1000     | 206434 | -0.00343483 | -0.00628373 |
| DVU1001     | 206435 | -0.345171   | -0.582604   |
| DVU1002     | 206436 | 0.122606    | 0.239862    |
| DVU1003     | 206437 | -0.336966   | -0.589984   |
| DVU1004     | 206438 | 0.721272    | 1.35245     |
| DVU1005     | 206439 | 0.144866    | 0.280731    |
| DVU1006     | 206440 | 0.179464    | 0.335855    |
| DVU1007     | 206441 | 0.338818    | 0.589085    |
| DVU1008     | 206442 | -0.587851   | -1.08729    |
| DVU1009     | 206443 | -0.73375    | -1.33365    |
| VIMSS206444 | 206444 | -0.902988   | -1.4825     |
| VIMSS206445 | 206445 | 0.0293076   | 0.0482225   |

|             |        |              |              |
|-------------|--------|--------------|--------------|
| DVU1012     | 206446 | 0.877148     | 1.5816       |
| DVU1013     | 206447 | 1.22974      | 2.35412      |
| VIMSS206448 | 206448 | 0.667827     | 0.702604     |
| VIMSS206449 | 206449 | 0.937248     | 0            |
| VIMSS206450 | 206450 | 0.532791     | 0.847612     |
| DVU1017     | 206451 | -0.107291    | -0.193171    |
| DVU1018     | 206452 | 0.188575     | 0.356858     |
| DVU1019     | 206453 | -0.395413    | -0.699546    |
| DVU1020     | 206454 | 0.38078      | 0.690749     |
| DVU1021     | 206455 | -1.02208     | -1.82775     |
| DVU1022     | 206456 | -0.923138    | -1.74859     |
| DVU1024     | 206458 | -0.598169    | -1.12796     |
| DVU1025     | 206459 | -0.934822    | -1.68905     |
| DVU1026     | 206460 | -0.66374     | -1.09294     |
| DVU1027     | 206461 | -0.43494     | -0.687443    |
| DVU1028     | 206462 | 0.106881     | 0.197846     |
| DVU1029     | 206463 | -1.58231     | -2.92669     |
| VIMSS206464 | 206464 | -0.298944    | -0.416514    |
| DVU1030     | 206465 | 0.5176       | 0.95929      |
| DVU1032     | 206466 | -0.209166    | -0.23898     |
| DVU1033     | 206467 | 0.5167       | 0.995804     |
| DVU1034     | 206468 | 0.327965     | 0.485339     |
| DVU1035     | 206469 | -0.232022    | -0.352728    |
| DVU1036     | 206470 | -0.161641    | -0.196711    |
| DVU1037     | 206471 | 0.311951     | 0.612522     |
| DVU1038     | 206472 | -0.846322    | -1.57017     |
| DVU1039     | 206473 | -0.931674    | -1.75125     |
| DVU1040     | 206474 | -0.496137    | -0.920792    |
| DVU1041     | 206475 | -0.708663    | -1.31058     |
| DVU1042     | 206476 | -1.29971     | -2.12853     |
| DVU1043     | 206477 | -0.725447    | -1.32507     |
| DVU1044     | 206478 | 0.291648     | 0.236824     |
| DVU1045     | 206479 | -1.76236     | -3.23236     |
| DVU1046     | 206480 | -1.23474     | -1.99326     |
| DVU1047     | 206481 | -1.22087     | -2.37587     |
| DVU1048     | 206482 | -0.866224    | -1.58037     |
| DVU1049     | 206483 | -0.833907    | -1.48888     |
| DVU1050     | 206484 | -1.10239     | -2.02321     |
| DVU1051     | 206485 | -0.565971    | -1.00078     |
| DVU1054     | 206488 | -0.356558    | -0.674327    |
| DVU1055     | 206489 | -1.17521     | -1.81381     |
| DVU1056     | 206490 | -0.392959    | -0.67743     |
| DVU1057     | 206491 | 0.0475662    | 0.0751324    |
| DVU1058     | 206492 | 0.908914     | 1.44042      |
| DVU1060     | 206494 | -1.2074      | -2.14267     |
| DVU1061     | 206495 | -0.96525     | -1.75103     |
| DVU1062     | 206496 | -1.67468     | -3.08236     |
| DVU1063     | 206497 | -0.570901    | 0            |
| DVU1064     | 206498 | -0.417117    | -0.756564    |
| DVU1065     | 206499 | -1.32703     | -2.47244     |
| DVU1066     | 206500 | -0.303797    | -0.560186    |
| DVU1067     | 206501 | -0.416961    | -0.793815    |
| DVU1068     | 206502 | 1.02658      | 1.68464      |
| DVU1069     | 206503 | -1.10592     | -1.80464     |
| DVU1070     | 206505 | -0.0677045   | -0.1043      |
| DVU1071     | 206506 | -0.239769    | -0.411622    |
| DVU1072     | 206507 | 0.673941     | 1.15246      |
| DVU1073     | 206508 | 0.981221     | 1.78414      |
| DVU1074     | 206509 | -1.88242     | -3.22897     |
| DVU1075     | 206510 | -0.989363    | -1.83842     |
| DVU1076     | 206511 | -0.965264    | -1.73326     |
| DVU1077     | 206512 | -1.29289     | -2.42102     |
| DVU1079     | 206514 | -0.224669    | -0.332061    |
| DVU1080     | 206515 | 0.557271     | 0.842999     |
| DVU1081     | 206516 | -1.35332     | -2.32858     |
| DVU1082     | 206517 | -1.06102     | -1.91001     |
| DVU1083     | 206518 | 0.981472     | 1.76156      |
| DVU1084     | 206519 | -0.000567832 | -0.000936122 |
| DVU1085     | 206520 | -0.632559    | -1.22956     |
| DVU1086     | 206521 | 0.915499     | 1.71118      |
| DVU1087     | 206522 | -0.159673    | -0.268003    |
| DVU1088     | 206523 | 0.114258     | 0.211658     |

|             |        |             |            |
|-------------|--------|-------------|------------|
| DVU1089     | 206524 | -1.58695    | -2.7223    |
| DVU1090     | 206525 | -0.142456   | -0.249002  |
| DVU1091     | 206526 | -0.354379   | -0.626667  |
| DVU1092     | 206527 | -0.947373   | -1.65452   |
| DVU1093     | 206528 | 0.192426    | 0.368239   |
| DVU1094     | 206529 | -0.753994   | -1.43316   |
| DVU1095     | 206530 | -1.27139    | -1.99972   |
| DVU1096     | 206531 | -0.179932   | -0.30457   |
| DVU1097     | 206532 | 0.0883209   | 0.166206   |
| DVU1098     | 206533 | 0.473096    | 0.868511   |
| DVU1099     | 206534 | -0.895637   | -1.52547   |
| DVU1100     | 206535 | -0.656204   | -1.10382   |
| VIMSS206536 | 206536 | -0.0778238  | -0.0978051 |
| DVU1103     | 206538 | -0.00969479 | -0.0161529 |
| DVU1104     | 206539 | -0.0466117  | -0.0706192 |
| DVU1105     | 206540 | 0.240894    | 0.370596   |
| DVU1106     | 206541 | 0.46603     | 0.736377   |
| DVU1107     | 206542 | 0.273255    | 0.371852   |
| DVU1108     | 206544 | -0.775609   | -1.2853    |
| DVU1109     | 206545 | -2.45943    | -3.56429   |
| DVU1110     | 206546 | -0.765195   | -1.18547   |
| DVU1111     | 206547 | -0.0937963  | -0.145478  |
| DVU1113     | 206549 | -0.325996   | -0.540459  |
| DVU1114     | 206550 | -0.0202534  | -0.0297434 |
| DVU1115     | 206551 | 0.952643    | 1.52458    |
| DVU1116     | 206552 | 0.246538    | 0.341919   |
| DVU1117     | 206553 | -0.0671616  | -0.119815  |
| DVU1118     | 206554 | 0.40001     | 0.576889   |
| DVU1120     | 206556 | -0.25969    | -0.34076   |
| DVU1121     | 206557 | 1.04536     | 1.92006    |
| DVU1122     | 206558 | -0.181706   | 0          |
| DVU1123     | 206559 | 0.73899     | 0.878606   |
| DVU1125     | 206560 | 0.678069    | 1.05256    |
| DVU1124     | 206561 | 0.291463    | 0.384004   |
| DVU1126     | 206562 | -0.239399   | -0.325095  |
| DVU1128     | 206564 | -0.0177346  | -0.0258758 |
| DVU1129     | 206565 | -0.231648   | -0.237192  |
| DVU1130     | 206566 | 0.266132    | 0.397113   |
| DVU1131     | 206567 | -0.365173   | -0.500128  |
| DVU1132     | 206568 | 0.427273    | 0.597882   |
| DVU1133     | 206569 | -0.0258483  | -0.0427444 |
| DVU1134     | 206570 | 0.629269    | 1.04845    |
| DVU1135     | 206571 | 0.745866    | 1.20778    |
| DVU1136     | 206572 | 0.303565    | 0.549141   |
| DVU1137     | 206573 | -0.0615824  | -0.0833233 |
| DVU1138     | 206574 | 0.235392    | 0.377817   |
| DVU1139     | 206575 | 0.0859221   | 0.119878   |
| DVU1140     | 206576 | 0.170413    | 0.276795   |
| DVU1141     | 206577 | 0.763452    | 1.20272    |
| DVU1142     | 206578 | 1.14504     | 1.67668    |
| DVU1143     | 206579 | 1.67896     | 0          |
| DVU1144     | 206580 | 0.580744    | 1.05762    |
| DVU1145     | 206582 | 0.0970179   | 0.175444   |
| VIMSS206583 | 206583 | 0.171154    | 0.281348   |
| DVU1147     | 206585 | -0.363875   | -0.495448  |
| VIMSS206586 | 206586 | -0.376341   | -0.618294  |
| VIMSS206587 | 206587 | -0.0911467  | -0.142749  |
| VIMSS206588 | 206588 | 0.371805    | 0.506377   |
| DVU1151     | 206589 | 0.0850234   | 0.110316   |
| DVU1153     | 206591 | -0.240609   | -0.409513  |
| DVU1154     | 206592 | 0.427771    | 0.739683   |
| DVU1155     | 206593 | -0.100589   | -0.164523  |
| DVU1157     | 206595 | -0.476832   | -0.727285  |
| DVU1158     | 206596 | -0.351586   | -0.482577  |
| DVU1159     | 206597 | 0.182609    | 0.333637   |
| DVU1160     | 206598 | 0.0878749   | 0.147988   |
| DVU1161     | 206599 | 0.47126     | 0.592978   |
| DVU1162     | 206600 | -0.106133   | -0.144808  |
| DVU1163     | 206601 | -0.247254   | -0.429086  |
| DVU1164     | 206602 | -0.0649069  | -0.0980517 |
| DVU1165     | 206603 | 0.352048    | 0.610877   |
| DVU1166     | 206604 | -0.928108   | -1.40802   |

|             |        |            |            |
|-------------|--------|------------|------------|
| VIMSS206605 | 206605 | -0.370431  | -0.411528  |
| VIMSS206606 | 206606 | 0.644186   | 1.09056    |
| VIMSS206607 | 206607 | 0.836468   | 0.718837   |
| DVU1168     | 206608 | 0.0397943  | 0.067872   |
| DVU1169     | 206609 | -0.788774  | -1.42804   |
| DVU1170     | 206610 | -1.73807   | -2.92567   |
| VIMSS206611 | 206611 | -0.193169  | -0.328431  |
| DVU1173     | 206613 | -0.0671457 | -0.120564  |
| DVU1174     | 206614 | 0.12359    | 0.222421   |
| DVU1175     | 206615 | 0.00271932 | 0.00506896 |
| DVU1176     | 206616 | -1.03414   | -1.55875   |
| DVU1177     | 206617 | 0.0300956  | 0.0555522  |
| VIMSS206618 | 206618 | -0.318412  | -0.367727  |
| DVU1179     | 206619 | 0.390071   | 0.647338   |
| DVU1180     | 206620 | 0.469703   | 0.887024   |
| DVU1181     | 206621 | 0.554922   | 0.988818   |
| DVU1182     | 206622 | -0.295082  | -0.560474  |
| VIMSS206623 | 206623 | -0.644232  | -1.10716   |
| DVU1185     | 206624 | -0.386454  | -0.692176  |
| DVU1186     | 206625 | -0.121767  | -0.228648  |
| DVU1187     | 206626 | -0.303157  | -0.549052  |
| DVU1188     | 206627 | 0.0743812  | 0.128389   |
| DVU1189     | 206628 | 0.0116612  | 0.0218883  |
| DVU1190     | 206629 | 0.336381   | 0.63375    |
| DVU1191     | 206630 | -0.678945  | -1.24433   |
| DVU1192     | 206631 | 0.119398   | 0          |
| DVU1193     | 206632 | 0.155208   | 0.298301   |
| DVU1194     | 206633 | -0.493403  | -0.908399  |
| DVU1195     | 206634 | -1.53907   | -2.52108   |
| DVU1196     | 206635 | -0.552922  | -0.979262  |
| DVU1197     | 206636 | -0.13051   | -0.224184  |
| DVU1198     | 206637 | -0.617207  | 0          |
| DVU1199     | 206638 | -0.739136  | -1.29943   |
| DVU1200     | 206639 | -0.443451  | -0.76641   |
| DVU1201     | 206640 | -0.253568  | -0.487094  |
| DVU1202     | 206641 | -0.723203  | -1.24794   |
| DVU1203     | 206642 | -0.862971  | -1.51494   |
| DVU1204     | 206643 | -1.33402   | -1.80848   |
| DVU1205     | 206644 | -1.96999   | -3.23865   |
| DVU1206     | 206645 | -1.79464   | -2.91309   |
| DVU1207     | 206646 | -0.932991  | -1.65998   |
| DVU1209     | 206648 | -0.77248   | -1.31006   |
| DVU1211     | 206650 | -0.163579  | -0.17175   |
| DVU1212     | 206651 | 1.43758    | 2.04248    |
| DVU1213     | 206652 | -1.05803   | -1.49327   |
| DVU1214     | 206653 | -0.389874  | 0          |
| DVU1215     | 206654 | -0.712739  | -1.21898   |
| VIMSS206655 | 206655 | -0.900843  | 0          |
| DVU1217     | 206656 | -0.919742  | -1.59803   |
| DVU1218     | 206657 | 0.172034   | 0.309142   |
| DVU1219     | 206658 | -0.386935  | -0.719248  |
| DVU1220     | 206659 | -1.23745   | 0          |
| DVU1221     | 206660 | -0.406216  | -0.695264  |
| DVU1222     | 206661 | -0.855004  | -1.59913   |
| DVU1223     | 206662 | -0.608853  | -1.02742   |
| DVU1224     | 206663 | -0.536135  | -0.953022  |
| DVU1226     | 206664 | -0.241278  | -0.432832  |
| DVU1225     | 206665 | -0.419257  | -0.753287  |
| VIMSS206666 | 206666 | -0.151693  | -0.253895  |
| DVU1228     | 206667 | -1.11981   | -1.85197   |
| VIMSS206668 | 206668 | 0.329042   | 0.418548   |
| DVU1230     | 206669 | -0.0849473 | -0.114114  |
| DVU1231     | 206670 | 0.0515521  | 0.0925291  |
| DVU1232     | 206671 | 1.67564    | 2.99343    |
| DVU1233     | 206672 | 0.0900125  | 0.137654   |
| DVU1235     | 206674 | 0.00117477 | 0.00189184 |
| DVU1236     | 206675 | -1.23418   | -1.98387   |
| DVU1237     | 206676 | -1.14001   | -1.82925   |
| DVU1238     | 206677 | -1.04455   | -1.6877    |
| DVU1239     | 206678 | -0.200746  | -0.330545  |
| DVU1240     | 206679 | -0.507742  | -0.847945  |
| DVU1241     | 206680 | 0.907263   | 1.59854    |



|             |        |                   |             |
|-------------|--------|-------------------|-------------|
| DVU1242     | 206681 | -0.464979         | -0.880937   |
| DVU1243     | 206682 | -0.203076         | 0           |
| DVU1244     | 206683 | 0.7559 1.43822    |             |
| DVU1245     | 206684 | -1.17789          | -2.28111    |
| DVU1246     | 206685 | 0.00382908        | 0.00731715  |
| DVU1247     | 206686 | -0.627139         | -1.16628    |
| DVU1248     | 206687 | -0.74897          | -1.36667    |
| DVU1249     | 206688 | -1.11195          | -1.8261     |
| DVU1250     | 206689 | 0.0250049         | 0.0466399   |
| DVU1251     | 206690 | -0.690039         | -1.16782    |
| DVU1252     | 206691 | -0.245258         | -0.431969   |
| DVU1253     | 206692 | -0.0324979        | -0.0571662  |
| DVU1254     | 206693 | -1.07739          | -1.97559    |
| DVU1255     | 206694 | -0.218662         | -0.355049   |
| DVU1256     | 206695 | -0.546749         | -1.02024    |
| DVU1258     | 206697 | 0.00954065        | 0.0170979   |
| VIMSS206698 | 206698 | 0.493381          | 0.390247    |
| DVU1260     | 206699 | -2.14153          | -3.76181    |
| DVU1261     | 206700 | -0.861097         | 0           |
| DVU1262     | 206701 | 0.223948          | 0.425234    |
| DVU1263     | 206702 | 0.447496          | 0.847899    |
| DVU1264     | 206703 | -0.790697         | -1.17296    |
| DVU1265     | 206704 | -0.098925         | -0.148877   |
| DVU1266     | 206705 | 0.662382          | 1.23582     |
| DVU1267     | 206706 | 0.0751937         | 0.140507    |
| VIMSS206707 | 206707 | -0.176511         | -0.284557   |
| DVU1268     | 206708 | 0.375869          | 0.424297    |
| DVU1270     | 206709 | -0.602988         | -0.971418   |
| DVU1271     | 206710 | -0.907157         | -1.61618    |
| DVU1272     | 206711 | -0.806076         | -1.39179    |
| DVU1273     | 206712 | -0.0186807        | -0.0347153  |
| DVU1274     | 206713 | -0.997402         | -1.85308    |
| DVU1275     | 206714 | -0.748181         | -1.33744    |
| DVU1276     | 206715 | -1.04489          | -1.85538    |
| DVU1277     | 206716 | -1.1713 -1.97093  |             |
| VIMSS206717 | 206717 | 0.576011          | 1.08069     |
| DVU1278     | 206718 | 0.0805374         | 0.133728    |
| DVU1279     | 206719 | 0.167297          | 0.300386    |
| DVU1280     | 206720 | -0.171145         | -0.327738   |
| DVU1281     | 206721 | -0.0468969        | -0.082234   |
| DVU1282     | 206723 | -0.0976239        | 0           |
| DVU1283     | 206724 | 1.20141 2.18484   |             |
| DVU1284     | 206725 | -1.16308          | -1.75716    |
| DVU1285     | 206726 | 0.0242767         | 0.0438015   |
| DVU1286     | 206727 | -0.276808         | -0.53377    |
| DVU1287     | 206728 | -0.00303471       | -0.00519826 |
| DVU1288     | 206729 | -0.794433         | -1.22947    |
| DVU1289     | 206730 | -0.476512         | -0.688002   |
| DVU1291     | 206732 | 0.443526          | 0.824604    |
| DVU1292     | 206733 | 0.0841514         | 0.132475    |
| DVU1294     | 206735 | -0.206946         | -0.380539   |
| VIMSS206737 | 206737 | -0.496892         | -0.714189   |
| DVU1297     | 206738 | -0.6916 -0.967665 |             |
| DVU1298     | 206739 | -0.369787         | -0.687623   |
| DVU1299     | 206740 | -1.68775          | -2.57718    |
| VIMSS206741 | 206741 | -1.00214          | -1.26751    |
| DVU1300     | 206742 | -0.869123         | -1.58024    |
| DVU1301     | 206743 | -0.196173         | -0.373361   |
| DVU1302     | 206744 | -0.223099         | -0.423297   |
| DVU1303     | 206745 | -0.747946         | -1.20444    |
| DVU1304     | 206746 | -0.627864         | -1.12998    |
| DVU1305     | 206747 | -0.601658         | -0.995666   |
| DVU1306     | 206748 | -0.652911         | -1.12484    |
| DVU1307     | 206749 | -0.438006         | -0.774662   |
| DVU1308     | 206750 | -0.67811          | -1.11771    |
| DVU1309     | 206751 | -0.45139          | -0.762917   |
| DVU1310     | 206752 | -0.89292          | -1.53112    |
| DVU1311     | 206753 | -0.696565         | -1.15892    |
| DVU1312     | 206754 | -0.708354         | -1.23663    |
| DVU1313     | 206755 | -0.586419         | -1.05932    |
| DVU1314     | 206756 | -0.0241505        | -0.0411886  |
| DVU1315     | 206757 | -0.0739841        | -0.125171   |

|             |        |            |            |
|-------------|--------|------------|------------|
| DVU1316     | 206758 | -0.919631  | -1.65725   |
| DVU1317     | 206759 | -0.647232  | -1.16267   |
| DVU1318     | 206760 | -0.936749  | -1.65982   |
| DVU1319     | 206761 | -0.619998  | -1.11182   |
| DVU1320     | 206762 | -0.0640647 | -0.120071  |
| DVU1321     | 206763 | -0.392285  | -0.655095  |
| DVU1322     | 206764 | -0.47512   | -0.872892  |
| DVU1323     | 206765 | 0.114086   | 0.185381   |
| DVU1324     | 206766 | -0.0882195 | -0.160689  |
| DVU1325     | 206767 | -0.461476  | -0.871303  |
| DVU1326     | 206768 | -0.894236  | -1.57369   |
| DVU1327     | 206769 | -0.919241  | -1.41431   |
| DVU1328     | 206770 | -1.17351   | -1.99177   |
| DVU1329     | 206771 | -0.852921  | -1.5557    |
| DVU1330     | 206772 | -1.08756   | -2.01433   |
| DVU1331     | 206773 | 0.430968   | 0.778717   |
| DVU1332     | 206774 | 0.0306721  | 0.0573842  |
| DVU1333     | 206775 | 0.761012   | 1.39291    |
| DVU1334     | 206776 | -0.897007  | -1.71442   |
| DVU1335     | 206777 | 0.325803   | 0.601978   |
| DVU1336     | 206778 | 0.0297311  | 0.0551659  |
| DVU1337     | 206779 | 0.230431   | 0.434533   |
| DVU1338     | 206780 | 0.30293    | 0.543264   |
| DVU1339     | 206781 | 0.937149   | 1.69515    |
| DVU1340     | 206782 | 0.72561    | 1.27782    |
| DVU1341     | 206783 | 0.704902   | 1.36109    |
| DVU1342     | 206784 | 0.927127   | 1.69097    |
| DVU1343     | 206785 | 0.897767   | 1.71312    |
| DVU1344     | 206786 | -0.234976  | -0.45466   |
| DVU1345     | 206787 | -0.302391  | -0.563791  |
| DVU1346     | 206788 | -1.12352   | -2.06903   |
| DVU1347     | 206789 | -1.24883   | -2.18495   |
| DVU1348     | 206790 | -1.39822   | -2.41373   |
| DVU1349     | 206791 | -0.379442  | -0.664971  |
| DVU1350     | 206792 | -1.0433    | -1.8716    |
| DVU1351     | 206793 | -0.797208  | -1.28177   |
| DVU1352     | 206794 | -0.362234  | -0.672895  |
| DVU1353     | 206795 | -0.606999  | -0.990756  |
| VIMSS206796 | 206796 | -1.05102   | -1.58256   |
| DVU1355     | 206797 | -0.0254322 | -0.0473338 |
| DVU1356     | 206798 | -0.16047   | -0.267077  |
| DVU1357     | 206799 | -0.757669  | -1.33489   |
| DVU1358     | 206800 | -0.0355561 | -0.0663997 |
| DVU1359     | 206801 | 0.289306   | 0.531694   |
| DVU1360     | 206802 | 0.292595   | 0.530441   |
| DVU1361     | 206803 | -0.835155  | -1.26297   |
| DVU1362     | 206804 | -0.646077  | -1.1577    |
| DVU1363     | 206805 | 0.418067   | 0.796919   |
| DVU1364     | 206806 | 0.290959   | 0.535977   |
| DVU1365     | 206807 | 0.0720086  | 0.125723   |
| DVU1366     | 206808 | -0.251974  | -0.45655   |
| DVU1368     | 206809 | 0.0924995  | 0.173823   |
| DVU1367     | 206810 | -0.764025  | -0.789334  |
| DVU1369     | 206811 | -0.259935  | -0.490896  |
| DVU1370     | 206812 | -0.556214  | -0.99259   |
| DVU1371     | 206813 | -0.386874  | -0.713621  |
| DVU1372     | 206814 | 0.50891    | 0.984167   |
| DVU1373     | 206815 | 0.0518258  | 0.100113   |
| DVU1374     | 206816 | 0.777488   | 1.4356     |
| DVU1375     | 206817 | 1.1147     | 2.06144    |
| DVU1376     | 206818 | 0.0984312  | 0.184632   |
| DVU1377     | 206819 | 0.164111   | 0.301723   |
| VIMSS206821 | 206821 | 0.183972   | 0.240973   |
| DVU1380     | 206822 | 0.784856   | 1.40415    |
| DVU1381     | 206823 | -0.415302  | -0.675205  |
| VIMSS206826 | 206826 | -0.769054  | -1.30388   |
| DVU1384     | 206827 | 0.116612   | 0.218245   |
| VIMSS206828 | 206828 | -0.413086  | -0.606107  |
| DVU1386     | 206829 | -0.288439  | -0.438903  |
| DVU1387     | 206830 | -0.205921  | -0.370117  |
| DVU1388     | 206831 | 1.21355    | 2.19982    |
| DVU1389     | 206832 | 0.0909541  | 0.158948   |

|             |        |            |            |
|-------------|--------|------------|------------|
| DVU1390     | 206833 | -0.337063  | -0.599672  |
| VIMSS206834 | 206834 | -0.34486   | -0.546547  |
| DVU1392     | 206835 | 0.560565   | 0.981344   |
| DVU1393     | 206836 | -1.11522   | -1.95564   |
| DVU1394     | 206837 | -0.340994  | -0.56099   |
| DVU1395     | 206838 | -0.395734  | -0.623168  |
| VIMSS206839 | 206839 | 1.17017    | 2.13451    |
| DVU1397     | 206840 | 1.65098    | 3.03698    |
| DVU1400     | 206843 | 0.485153   | 0.888959   |
| DVU1401     | 206844 | -0.0256527 | -0.0449863 |
| DVU1402     | 206845 | 0.433914   | 0.736504   |
| DVU1403     | 206846 | 0.0929352  | 0.160208   |
| DVU1404     | 206847 | 0.469426   | 0.723868   |
| DVU1405     | 206848 | 0.313982   | 0.56876    |
| DVU1406     | 206849 | -1.11364   | -1.9921    |
| DVU1408     | 206850 | 0.514887   | 0.798746   |
| DVU1409     | 206851 | 0.350173   | 0.640387   |
| DVU1407     | 206852 | -0.303223  | -0.585513  |
| DVU1410     | 206853 | 0.504194   | 0.947088   |
| DVU1411     | 206854 | -2.3116    | -3.7338    |
| DVU1412     | 206855 | 0.448353   | 0.868637   |
| DVU1413     | 206856 | 0.243687   | 0.461124   |
| DVU1414     | 206857 | 0.181272   | 0.2815     |
| VIMSS206858 | 206858 | -0.526089  | -0.753333  |
| DVU1416     | 206859 | -0.181874  | -0.237483  |
| VIMSS206860 | 206860 | 0.421726   | 0.493636   |
| DVU1418     | 206861 | -0.30278   | -0.528604  |
| DVU1419     | 206862 | 0.331883   | 0.580062   |
| DVU1420     | 206863 | 0.882811   | 1.67282    |
| VIMSS206864 | 206864 | 0.989267   | 1.7601     |
| DVU1421     | 206865 | 0.148289   | 0          |
| DVU1422     | 206866 | -0.110529  | -0.199871  |
| DVU1423     | 206867 | 0.306834   | 0.579981   |
| DVU1424     | 206868 | -0.720633  | -1.25837   |
| DVU1425     | 206869 | -0.285336  | -0.534519  |
| DVU1426     | 206870 | -0.164889  | -0.258804  |
| DVU1427     | 206871 | 0.107813   | 0.199117   |
| DVU1428     | 206872 | 0.552268   | 1.03086    |
| DVU1429     | 206873 | -0.338444  | 0          |
| DVU1430     | 206874 | 0.79683    | 1.47893    |
| DVU1431     | 206875 | 1.1121     | 2.08386    |
| DVU1432     | 206876 | 0.0287143  | 0.052337   |
| VIMSS206877 | 206877 | 0.571623   | 0.961975   |
| DVU1434     | 206878 | 0.324014   | 0.602611   |
| DVU1435     | 206879 | -0.236714  | -0.41984   |
| DVU1436     | 206880 | 0.0884428  | 0.16643    |
| VIMSS206881 | 206881 | 0.684303   | 1.12073    |
| DVU1438     | 206882 | 1.04476    | 1.98809    |
| VIMSS206883 | 206883 | 0.476009   | 0.848536   |
| DVU1440     | 206884 | 0.496357   | 0.91662    |
| DVU1441     | 206885 | 0.545529   | 0.927536   |
| DVU1442     | 206886 | 1.34297    | 2.36486    |
| DVU1443     | 206887 | -0.123063  | -0.155301  |
| DVU1444     | 206888 | 0.508788   | 0.598402   |
| DVU1445     | 206889 | 0.217236   | 0.323438   |
| DVU1446     | 206890 | 0.512775   | 0.704058   |
| DVU1447     | 206891 | -0.408426  | -0.73509   |
| DVU1448     | 206892 | 0.0894104  | 0.167537   |
| DVU1449     | 206893 | 0.416208   | 0.785024   |
| DVU1450     | 206894 | 0.643875   | 1.24804    |
| DVU1451     | 206895 | -0.105505  | -0.202194  |
| DVU1452     | 206896 | 0.0311999  | 0.0552601  |
| DVU1453     | 206897 | -0.182846  | -0.338512  |
| DVU1454     | 206898 | -0.0723468 | -0.130656  |
| DVU1455     | 206899 | -0.543547  | -0.949885  |
| DVU1457     | 206901 | 1.06652    | 2.00114    |
| DVU1458     | 206902 | 0.269299   | 0.485734   |
| DVU1459     | 206904 | -0.860286  | -1.42073   |
| DVU1460     | 206905 | -0.050443  | -0.097027  |
| DVU1461     | 206906 | -0.349857  | -0.649284  |
| DVU1462     | 206907 | 0.933806   | 1.74922    |
| DVU1463     | 206908 | 0.804767   | 1.50148    |

|             |        |             |             |
|-------------|--------|-------------|-------------|
| DVU1464     | 206909 | 0.0722307   | 0.123501    |
| DVU1465     | 206910 | 0.336366    | 0.60328     |
| DVU1466     | 206911 | -0.178846   | -0.331815   |
| DVU1467     | 206912 | -0.460574   | -0.853302   |
| DVU1468     | 206913 | 0.321462    | 0.585785    |
| DVU1469     | 206914 | -0.731867   | -1.20878    |
| DVU1470     | 206915 | -0.336835   | -0.629015   |
| DVU1471     | 206916 | 1.16747     | 2.15428     |
| DVU1472     | 206917 | 1.1534      | 2.14644     |
| VIMSS206918 | 206918 | 1.23251     | 1.67643     |
| VIMSS206919 | 206919 | 2.28755     | 4.1947      |
| DVU1474     | 206920 | 2.08344     | 3.24836     |
| DVU1475     | 206921 | 0.447851    | 0.780808    |
| DVU1476     | 206922 | 0.135556    | 0.163203    |
| DVU1479     | 206927 | -0.0968812  | -0.156516   |
| DVU1480     | 206928 | 0.375933    | 0.698377    |
| DVU1483     | 206931 | -0.144676   | -0.223808   |
| DVU1484     | 206932 | -0.130285   | -0.223693   |
| DVU1488     | 206935 | 0.464921    | 0.712871    |
| DVU1489     | 206936 | 1.17788     | 1.5928      |
| DVU1491     | 206938 | 1.66489     | 2.79202     |
| DVU1494     | 206941 | 0.775647    | 1.19447     |
| DVU1499     | 206944 | 0.789256    | 0.984594    |
| DVU1500     | 206945 | 0.960926    | 1.37205     |
| DVU1501     | 206947 | 0.741545    | 1.03795     |
| DVU1502     | 206948 | 0.945184    | 1.2286      |
| DVU1503     | 206949 | 0.929509    | 1.35494     |
| DVU1504     | 206950 | 0.476483    | 0.699682    |
| DVU1505     | 206951 | 0.764007    | 0.930964    |
| DVU1506     | 206952 | 0.72753     | 1.07798     |
| DVU1507     | 206953 | -0.633438   | -1.03899    |
| DVU1508     | 206954 | -0.395548   | -0.606054   |
| DVU1509     | 206956 | -0.269882   | -0.491002   |
| VIMSS206959 | 206959 | -0.165279   | -0.239696   |
| DVU1513     | 206960 | 0.685233    | 0.79644     |
| DVU1514     | 206961 | 0.463175    | 0.597688    |
| DVU1515     | 206962 | 0.769191    | 1.01328     |
| DVU1516     | 206963 | 0.524269    | 0.815027    |
| DVU1517     | 206964 | 1.24817     | 0           |
| DVU1518     | 206965 | 1.70418     | 0           |
| DVU1520     | 206969 | 0.453215    | 0.710074    |
| DVU1521     | 206970 | 0.547983    | 0.936539    |
| DVU1522     | 206971 | 0.22468     | 0.32156     |
| DVU1523     | 206972 | 1.17748     | 1.40465     |
| DVU1524     | 206973 | 1.07284     | 1.71114     |
| DVU1525     | 206974 | 1.17806     | 1.55795     |
| DVU1527     | 206975 | 1.08763     | 1.30731     |
| DVU1528     | 206976 | 0.625454    | 1.18129     |
| DVU1529     | 206977 | 0.630407    | 1.21005     |
| DVU1530     | 206978 | -0.372549   | -0.600399   |
| DVU1531     | 206979 | -0.0801207  | -0.152608   |
| DVU1532     | 206980 | 0.254858    | 0.449282    |
| DVU1533     | 206981 | -0.782652   | -1.13754    |
| DVU1534     | 206982 | 1.71281     | 2.59414     |
| DVU1535     | 206983 | 1.77225     | 3.02299     |
| DVU1536     | 206984 | 1.14735     | 2.02862     |
| DVU1537     | 206985 | -0.691646   | -1.29399    |
| DVU1538     | 206986 | -0.754932   | -1.4345     |
| DVU1540     | 206988 | -0.946186   | -1.65946    |
| DVU1541     | 206989 | 0.932242    | 1.76364     |
| DVU1542     | 206990 | 0.288337    | 0.433788    |
| DVU1543     | 206991 | 0.538531    | 0.849381    |
| DVU1544     | 206992 | 0.353938    | 0.680111    |
| DVU1545     | 206993 | -0.00264287 | -0.00441505 |
| VIMSS206994 | 206994 | -0.124171   | -0.19978    |
| DVU1547     | 206995 | 0.65077     | 1.22882     |
| DVU1548     | 206996 | -0.761715   | -1.25742    |
| DVU1549     | 206997 | 0.778277    | 1.37611     |
| DVU1550     | 206998 | 0.364899    | 0           |
| DVU1551     | 206999 | -0.524695   | -0.906399   |
| DVU1552     | 207000 | 0.554047    | 0.820224    |
| DVU1553     | 207001 | 0.268719    | 0.457203    |

|             |        |            |          |            |
|-------------|--------|------------|----------|------------|
| DVU1554     | 207002 | 1.00859    | 1.60731  |            |
| DVU1555     | 207003 | 1.13931    | 1.79474  |            |
| DVU1556     | 207004 | 0.983566   |          | 1.38673    |
| DVU1558     | 207006 | 1.0079     | 1.48417  |            |
| DVU1559     | 207007 | 0.618199   |          | 1.07405    |
| DVU1560     | 207008 | 0.567694   |          | 0.696537   |
| DVU1561     | 207010 | 1.54051    | 0        |            |
| DVU1562     | 207011 | 0.275552   |          | 0.490254   |
| DVU1563     | 207012 | 1.13514    | 1.46708  |            |
| VIMSS207013 | 207013 | 1.05828    | 1.19561  |            |
| VIMSS207014 | 207014 | 1.32512    | 2.31241  |            |
| VIMSS207015 | 207015 | 0.778853   |          | 0          |
| DVU1566     | 207016 | 0.31532    | 0.531365 |            |
| DVU1568     | 207018 | 0.892732   |          | 1.54365    |
| DVU1569     | 207019 | 0.178602   |          | 0.304194   |
| DVU1570     | 207020 | 0.688779   |          | 1.17883    |
| DVU1571     | 207021 | -0.557511  |          | -0.990231  |
| DVU1572     | 207022 | 0.996375   |          | 1.91391    |
| DVU1573     | 207023 | -0.633365  |          | -1.10289   |
| DVU1574     | 207024 | -1.64743   |          | -2.53933   |
| DVU1575     | 207025 | -1.22838   |          | -2.175     |
| DVU1576     | 207026 | -1.57062   |          | -2.93974   |
| VIMSS207027 | 207027 | 0.599598   |          | 0.808844   |
| DVU1577     | 207028 | 0.302335   |          | 0.553863   |
| DVU1578     | 207029 | 0.615014   |          | 0.996794   |
| DVU1579     | 207030 | 0.29753    | 0.563389 |            |
| DVU1580     | 207031 | -0.0540293 |          | -0.102563  |
| DVU1581     | 207032 | -0.14462   |          | -0.269779  |
| DVU1582     | 207033 | 0.196763   |          | 0.379963   |
| DVU1583     | 207034 | -0.410303  |          | -0.674025  |
| DVU1584     | 207035 | -0.784585  |          | -1.37732   |
| DVU1585     | 207036 | -0.121701  |          | -0.191006  |
| DVU1586     | 207037 | 0.223296   |          | 0.410718   |
| DVU1587     | 207038 | -0.952125  |          | -1.8418    |
| DVU1589     | 207040 | 0.538245   |          | 0.930633   |
| DVU1590     | 207041 | 0.38453    | 0.711889 |            |
| DVU1591     | 207042 | 0.283074   |          | 0.445572   |
| DVU1592     | 207043 | 1.029      | 1.89617  |            |
| DVU1593     | 207044 | 1.2635     | 0        |            |
| DVU1594     | 207045 | 1.0784     | 0        |            |
| DVU1595     | 207046 | 0.799836   |          | 1.49707    |
| DVU1596     | 207047 | 0.803545   |          | 1.43003    |
| DVU1597     | 207048 | 0.503804   |          | 0.780425   |
| DVU1599     | 207050 | 0.202457   |          | 0.342951   |
| DVU1600     | 207051 | 0.641808   |          | 1.12924    |
| DVU1601     | 207052 | 0.577479   |          | 0.966111   |
| DVU1603     | 207054 | 1.00282    | 1.59518  |            |
| DVU1604     | 207055 | -0.465149  |          | 0          |
| DVU1605     | 207056 | 0.0146668  |          | 0.0221713  |
| DVU1606     | 207057 | 0.26415    | 0.475989 |            |
| DVU1607     | 207058 | -0.542738  |          | -1.02676   |
| DVU1608     | 207059 | -0.871684  |          | -1.6114    |
| DVU1609     | 207060 | -0.616574  |          | -1.12932   |
| DVU1610     | 207061 | -0.0690371 |          | 0          |
| DVU1611     | 207062 | -0.255833  |          | -0.461998  |
| DVU1612     | 207063 | 0.781088   |          | 1.50624    |
| DVU1613     | 207064 | -0.281337  |          | -0.539292  |
| DVU1614     | 207065 | -0.582169  |          | -1.07911   |
| VIMSS207066 | 207066 | -0.123063  |          | -0.228887  |
| DVU1615     | 207067 | -0.713432  |          | -1.22317   |
| DVU1617     | 207068 | -0.768124  |          | -1.45044   |
| DVU1618     | 207069 | -0.433273  |          | -0.757413  |
| DVU1619     | 207070 | -0.499371  |          | -0.904946  |
| DVU1620     | 207071 | 1.00314    | 0        |            |
| DVU1621     | 207072 | -0.28229   |          | -0.516668  |
| DVU1622     | 207073 | -1.08225   |          | -1.92226   |
| DVU1623     | 207074 | 0.230481   |          | 0.417851   |
| DVU1624     | 207075 | 0.516278   |          | 0.818083   |
| DVU1625     | 207076 | -0.0519408 |          | -0.0974001 |
| DVU1626     | 207077 | -0.753345  |          | -1.39954   |
| VIMSS207078 | 207078 | 0.18076    | 0.226012 |            |
| DVU1627     | 207079 | -0.400878  |          | -0.770326  |

|             |        |             |             |
|-------------|--------|-------------|-------------|
| DVU1628     | 207080 | -0.0877458  | -0.162157   |
| DVU1629     | 207081 | 0.952536    | 1.76508     |
| DVU1630     | 207082 | 0.283244    | 0.501176    |
| DVU1631     | 207083 | -0.966126   | -1.8502     |
| DVU1632     | 207084 | -0.832331   | -1.52258    |
| DVU1633     | 207085 | -0.0882228  | -0.162509   |
| DVU1634     | 207086 | 0.491684    | 0.924451    |
| DVU1635     | 207087 | -1.01763    | -1.87223    |
| DVU1636     | 207088 | -1.5381     | -2.58822    |
| DVU1638     | 207090 | 0.847242    | 1.53398     |
| DVU1639     | 207091 | -0.253132   | -0.45179    |
| DVU1641     | 207094 | -0.0442548  | -0.0742667  |
| VIMSS207099 | 207099 | -0.0819145  | -0.109916   |
| DVU1644     | 207100 | 0.100887    | 0.16395     |
| DVU1645     | 207101 | -0.956081   | -1.73846    |
| DVU1646     | 207104 | 0.200279    | 0.31335     |
| DVU1647     | 207105 | 0.569174    | 1.09251     |
| DVU1648     | 207106 | 0.195439    | 0.366998    |
| DVU1649     | 207107 | 0.192643    | 0.371017    |
| VIMSS207108 | 207108 | -0.02705    | -0.0395084  |
| DVU1650     | 207109 | -0.448515   | -0.800703   |
| DVU1651     | 207110 | -0.195194   | -0.333013   |
| DVU1652     | 207111 | -0.188308   | -0.34718    |
| DVU1655     | 207114 | 0.14393     | 0.274675    |
| DVU1656     | 207115 | 0.812745    | 1.48477     |
| DVU1657     | 207116 | 0.758043    | 1.4038      |
| DVU1658     | 207117 | 0.331976    | 0.61802     |
| VIMSS207118 | 207118 | 0.498985    | 0.832914    |
| DVU1660     | 207119 | -0.197875   | -0.361066   |
| DVU1661     | 207120 | -0.793855   | -1.36477    |
| DVU1662     | 207121 | -0.875602   | -1.58068    |
| DVU1663     | 207122 | -1.36112    | -2.23709    |
| DVU1664     | 207123 | -0.492688   | -0.898332   |
| DVU1665     | 207124 | -1.35903    | -2.39933    |
| DVU1666     | 207125 | -1.84233    | -3.3676     |
| DVU1667     | 207126 | -0.0227455  | -0.0425     |
| DVU1668     | 207127 | -0.64841    | -1.10757    |
| DVU1669     | 207128 | -0.605852   | -1.07413    |
| DVU1670     | 207129 | -0.00333195 | -0.00569834 |
| DVU1671     | 207130 | -1.01228    | -1.71859    |
| DVU1672     | 207131 | -0.103958   | -0.193127   |
| DVU1673     | 207132 | -0.992032   | -1.72906    |
| DVU1674     | 207133 | 0.399231    | 0.749764    |
| DVU1675     | 207134 | 1.19101     | 1.90188     |
| DVU1676     | 207135 | -1.10414    | -1.9271     |
| DVU1677     | 207136 | 0.196242    | 0.348245    |
| DVU1678     | 207137 | -0.656552   | -1.14538    |
| DVU1679     | 207138 | 0.382239    | 0.682946    |
| DVU1680     | 207139 | -0.204177   | -0.386454   |
| DVU1681     | 207140 | 0.297155    | 0.57122     |
| DVU1682     | 207141 | 0.396822    | 0.749656    |
| DVU1683     | 207142 | -0.173048   | -0.272051   |
| DVU1684     | 207143 | -0.210263   | -0.393551   |
| DVU1685     | 207144 | 0.761003    | 1.45533     |
| DVU1686     | 207145 | 0.577071    | 1.127       |
| DVU1687     | 207146 | 0.0820199   | 0.124895    |
| DVU1688     | 207147 | -0.414351   | -0.758526   |
| VIMSS207148 | 207148 | -0.624084   | -0.969105   |
| DVU1690     | 207149 | -1.46027    | -2.6654     |
| VIMSS207150 | 207150 | -0.240055   | -0.28671    |
| DVU1692     | 207151 | 0.230673    | 0.434754    |
| DVU1693     | 207152 | -0.00984106 | -0.0183863  |
| DVU1694     | 207153 | -0.236199   | -0.389694   |
| DVU1695     | 207154 | 0.217684    | 0.338088    |
| DVU1696     | 207155 | 0.129811    | 0.139534    |
| DVU1697     | 207156 | 0.491124    | 0.686424    |
| DVU1698     | 207157 | 0.65619     | 0.998174    |
| DVU1699     | 207159 | 0.210566    | 0           |
| DVU1701     | 207161 | -0.0754342  | -0.109761   |
| DVU1703     | 207163 | 0.392874    | 0.720766    |
| VIMSS207164 | 207164 | -0.496851   | -0.860205   |
| DVU1705     | 207165 | -0.10098    | -0.168886   |

|             |        |            |          |            |
|-------------|--------|------------|----------|------------|
| DVU1707     | 207166 | 1.46446    | 0        |            |
| DVU1708     | 207167 | 0.291301   |          | 0.47829    |
| DVU1709     | 207168 | 0.424131   |          | 0.712488   |
| DVU1711     | 207171 | 0.0940982  |          | 0.166814   |
| DVU1713     | 207173 | 0.447741   |          | 0.604185   |
| DVU1714     | 207174 | 0.621338   |          | 0.863572   |
| DVU1715     | 207175 | 0.329479   |          | 0.397968   |
| DVU1716     | 207176 | 0.348531   |          | 0.457428   |
| DVU1717     | 207177 | 0.393327   |          | 0.56549    |
| DVU1718     | 207178 | 0.116204   |          | 0.136753   |
| DVU1719     | 207179 | 0.491131   |          | 0.635792   |
| DVU1720     | 207180 | 0.453142   |          | 0.4312     |
| DVU1721     | 207181 | 0.46897    | 0.612359 |            |
| DVU1723     | 207183 | 0.856317   |          | 0          |
| DVU1724     | 207184 | 1.67901    | 1.61009  |            |
| DVU1725     | 207185 | 0.463277   |          | 0.70287    |
| DVU1727     | 207186 | 0.741015   |          | 0.921247   |
| DVU1726     | 207187 | 0.0147382  |          | 0.0211301  |
| DVU1728     | 207188 | -0.20289   |          | -0.332599  |
| DVU1729     | 207189 | 0.642496   |          | 1.17797    |
| DVU1730     | 207190 | 0.74804    | 1.24009  |            |
| DVU1731     | 207191 | 0.882866   |          | 0          |
| VIMSS207192 | 207192 | 0.865956   |          | 0.765797   |
| VIMSS207194 | 207194 | 0.741062   |          | 1.23248    |
| VIMSS207195 | 207195 | 0.727248   |          | 1.1649     |
| DVU1736     | 207197 | 0.323012   |          | 0.491472   |
| DVU1737     | 207198 | 0.309492   |          | 0.511097   |
| DVU1738     | 207199 | 0.602524   |          | 0.827727   |
| VIMSS207200 | 207200 | 2.32492    | 2.38071  |            |
| DVU1740     | 207201 | 1.40772    |          | 0          |
| DVU1741     | 207202 | 0.404523   |          | 0.561674   |
| DVU1742     | 207203 | 0.274974   |          | 0.490284   |
| DVU1743     | 207204 | -0.0396458 |          | -0.0608782 |
| DVU1744     | 207205 | -0.283927  |          | -0.394282  |
| DVU1746     | 207208 | 0.218344   |          | 0.391019   |
| VIMSS207210 | 207210 | 1.36529    | 1.14141  |            |
| VIMSS207212 | 207212 | 0.348944   |          | 0.507191   |
| DVU1750     | 207213 | -1.45158   |          | -2.39294   |
| DVU1751     | 207214 | -1.92533   |          | 0          |
| VIMSS207215 | 207215 | -0.894553  |          | -1.58421   |
| DVU1752     | 207216 | 0.329045   |          | 0.473611   |
| DVU1753     | 207217 | -0.0112066 |          | -0.0157318 |
| DVU1754     | 207218 | 0.546976   |          | 0.785024   |
| VIMSS207219 | 207219 | 0.732065   |          | 1.16566    |
| VIMSS207220 | 207220 | 0.331461   |          | 0.556468   |
| DVU1756     | 207221 | -0.435663  |          | -0.763412  |
| DVU1758     | 207223 | 0.496496   |          | 0.87832    |
| DVU1759     | 207224 | 0.266157   |          | 0.429961   |
| DVU1760     | 207225 | 0.0421426  |          | 0.0700581  |
| DVU1762     | 207227 | 0.253282   |          | 0.43621    |
| VIMSS207228 | 207228 | 0.468432   |          | 0.703006   |
| DVU1764     | 207229 | -0.643207  |          | -1.20424   |
| DVU1765     | 207230 | -0.25901   |          | -0.381417  |
| DVU1766     | 207231 | 0.531044   |          | 0.671972   |
| DVU1767     | 207232 | 0.261777   |          | 0.429274   |
| DVU1768     | 207233 | -0.0302915 |          | -0.0413031 |
| DVU1769     | 207234 | 0.156722   |          | 0.26307    |
| DVU1770     | 207235 | 1.28178    | 1.92384  |            |
| DVU1771     | 207236 | 0.0700676  |          | 0.127193   |
| DVU1772     | 207237 | -0.4803    | -0.86452 |            |
| VIMSS207238 | 207238 | 0.188147   |          | 0.336207   |
| DVU1774     | 207239 | 0.103226   |          | 0.19059    |
| DVU1775     | 207240 | -0.948658  |          | -1.73414   |
| DVU1776     | 207241 | -0.543678  |          | -0.852575  |
| DVU1777     | 207242 | -0.543307  |          | -1.00603   |
| DVU1778     | 207243 | -0.0560584 |          | -0.105029  |
| DVU1779     | 207244 | 1.02628    | 1.66996  |            |
| DVU1780     | 207245 | 1.30593    | 2.39888  |            |
| DVU1781     | 207246 | 1.35539    | 2.59676  |            |
| DVU1782     | 207247 | 1.84339    | 3.57882  |            |
| DVU1783     | 207248 | 1.66971    | 3.08918  |            |
| DVU1784     | 207249 | 0.0203108  |          | 0.0388707  |

|             |        |             |            |
|-------------|--------|-------------|------------|
| DVU1785     | 207250 | 0.412959    | 0.660558   |
| DVU1786     | 207251 | 0.494487    | 0.92193    |
| DVU1787     | 207252 | -0.364235   | -0.677741  |
| DVU1788     | 207253 | -0.334885   | -0.653436  |
| DVU1789     | 207254 | -0.371821   | -0.576983  |
| DVU1791     | 207256 | -0.530571   | -0.982637  |
| DVU1792     | 207257 | -0.731383   | -1.36449   |
| VIMSS207258 | 207258 | -0.218576   | -0.407947  |
| DVU1794     | 207259 | -0.3909     | -0.735397  |
| DVU1795     | 207260 | 0.592257    | 1.10859    |
| DVU1797     | 207262 | -0.278097   | -0.498469  |
| DVU1798     | 207263 | -0.286048   | -0.538537  |
| DVU1799     | 207264 | 0.526158    | 0.955143   |
| VIMSS207265 | 207265 | 0.777859    | 1.18146    |
| DVU1801     | 207266 | -0.280611   | 0          |
| DVU1802     | 207267 | -0.0506386  | -0.0847764 |
| DVU1803     | 207268 | 0.180495    | 0.319726   |
| DVU1804     | 207269 | 0.883098    | 0          |
| DVU1805     | 207270 | 0.553181    | 1.01402    |
| DVU1806     | 207271 | -0.266903   | -0.451843  |
| DVU1807     | 207272 | -0.184946   | -0.266931  |
| DVU1808     | 207273 | -0.454743   | -0.781449  |
| DVU1809     | 207274 | 0.736371    | 1.40425    |
| DVU1810     | 207275 | 0.891901    | 1.53295    |
| DVU1811     | 207276 | 1.05106     | 1.90557    |
| DVU1812     | 207277 | 1.01675     | 1.82505    |
| DVU1813     | 207278 | 1.54554     | 2.68304    |
| DVU1814     | 207279 | 1.44808     | 2.75412    |
| DVU1816     | 207281 | 1.18843     | 2.24835    |
| DVU1818     | 207283 | -0.916346   | -1.69229   |
| DVU1819     | 207284 | -1.04757    | -1.99767   |
| DVU1820     | 207285 | -0.592083   | -1.00416   |
| DVU1821     | 207286 | -0.768686   | 0          |
| DVU1822     | 207287 | 0.318108    | 0.558652   |
| DVU1823     | 207288 | 0.0705199   | 0.118551   |
| DVU1824     | 207289 | 1.27764     | 2.01286    |
| DVU1825     | 207290 | 0.191933    | 0          |
| DVU1826     | 207291 | -2.03953    | -3.60914   |
| DVU1827     | 207292 | -0.440219   | 0          |
| DVU1828     | 207293 | -1.68658    | -2.55628   |
| DVU1830     | 207295 | 0.207368    | 0.391043   |
| DVU1832     | 207297 | 0.389025    | 0.683192   |
| DVU1833     | 207298 | -0.490902   | -0.91364   |
| DVU1834     | 207299 | 0.940813    | 1.57412    |
| DVU1835     | 207300 | -0.0679536  | 0          |
| VIMSS207301 | 207301 | -0.128283   | -0.246053  |
| DVU1836     | 207302 | 0.388238    | 0          |
| DVU1837     | 207303 | -0.961306   | -1.52216   |
| DVU1838     | 207304 | 0.690784    | 1.3157     |
| DVU1839     | 207305 | 1.49503     | 2.87822    |
| DVU1840     | 207306 | -0.899233   | 0          |
| DVU1841     | 207307 | -1.00439    | -1.6747    |
| DVU1842     | 207308 | -0.19547    | -0.376919  |
| DVU1843     | 207309 | -0.797461   | -1.37504   |
| DVU1844     | 207310 | 0.400612    | 0          |
| DVU1845     | 207311 | 0.626493    | 1.11801    |
| DVU1846     | 207312 | 0.908884    | 1.53818    |
| DVU1847     | 207313 | -0.00694308 | -0.0122133 |
| DVU1848     | 207314 | -0.460321   | 0          |
| DVU1849     | 207315 | -0.945265   | -1.80559   |
| DVU1850     | 207316 | 0.211722    | 0          |
| DVU1851     | 207317 | -0.406288   | -0.728542  |
| DVU1853     | 207318 | 1.42349     | 0          |
| DVU1854     | 207319 | 0.655023    | 0.894039   |
| VIMSS207320 | 207320 | 0.497363    | 0.47085    |
| DVU1855     | 207321 | 0.82576     | 1.26672    |
| VIMSS207322 | 207322 | -0.446077   | 0          |
| DVU1857     | 207323 | 0.963671    | 1.75359    |
| DVU1859     | 207325 | 0.908143    | 1.634      |
| DVU1860     | 207326 | -0.574933   | -1.03346   |
| DVU1861     | 207327 | 1.16098     | 2.18659    |
| DVU1862     | 207328 | 1.4374      | 2.49674    |



|             |        |             |           |
|-------------|--------|-------------|-----------|
| DVU1863     | 207329 | -0.356012   | -0.618717 |
| DVU1865     | 207331 | -0.0990729  | -0.17056  |
| DVU1866     | 207332 | -0.0575891  | -0.104006 |
| DVU1867     | 207333 | 0.655768    | 1.23721   |
| DVU1868     | 207334 | 0.47725     | 0.899841  |
| DVU1869     | 207335 | 0.670669    | 1.2199    |
| DVU1870     | 207336 | 0.016762    | 0         |
| VIMSS207338 | 207338 | 0.362237    | 0         |
| DVU1873     | 207339 | -1.23813    | -2.04358  |
| DVU1874     | 207340 | 0.657955    | 1.24946   |
| DVU1875     | 207341 | 0.539904    | 1.03372   |
| DVU1876     | 207342 | 0.599881    | 1.11335   |
| DVU1877     | 207343 | 0.0856135   | 0.151607  |
| DVU1881     | 207347 | 0.404264    | 0.73998   |
| DVU1882     | 207348 | -0.424178   | 0         |
| DVU1883     | 207349 | -0.15704    | -0.281799 |
| DVU1884     | 207350 | 0.596938    | 0.921793  |
| DVU1886     | 207352 | -0.134267   | 0         |
| DVU1887     | 207353 | -0.518126   | -0.963314 |
| DVU1888     | 207354 | -0.0496634  | 0         |
| DVU1889     | 207355 | -0.817011   | -1.51711  |
| VIMSS207356 | 207356 | 0.307026    | 0         |
| DVU1890     | 207357 | -0.243604   | 0         |
| DVU1891     | 207358 | -0.00613507 | 0         |
| DVU1892     | 207359 | 0.619035    | 1.13329   |
| DVU1894     | 207361 | 1.45209     | 2.56421   |
| DVU1895     | 207363 | 0.278132    | 0.459257  |
| DVU1896     | 207364 | -0.827294   | -1.28694  |
| DVU1898     | 207366 | -0.49731    | -0.919288 |
| DVU1899     | 207367 | 0.99224     | 1.47264   |
| DVU1900     | 207368 | -0.511253   | -0.963715 |
| DVU1901     | 207369 | 0.398251    | 0.775817  |
| DVU1902     | 207370 | 0.0140098   | 0.0220435 |
| DVU1903     | 207371 | -0.14639    | -0.257715 |
| DVU1904     | 207372 | 0.787845    | 1.45486   |
| VIMSS207374 | 207374 | -0.11656    | -0.184431 |
| VIMSS207375 | 207375 | -0.551529   | -0.626043 |
| DVU1909     | 207378 | 1.11937     | 0         |
| DVU1910     | 207379 | -0.598692   | 0         |
| DVU1911     | 207380 | -0.713006   | -1.17856  |
| DVU1913     | 207382 | -0.417773   | 0         |
| DVU1915     | 207384 | 0.305219    | 0.568388  |
| DVU1916     | 207385 | 0.28738     | 0.488526  |
| DVU1919     | 207388 | -0.124069   | -0.21919  |
| VIMSS207389 | 207389 | 0.457122    | 0.568082  |
| DVU1921     | 207390 | 1.36431     | 1.84685   |
| DVU1922     | 207391 | 1.25137     | 2.07483   |
| DVU1923     | 207392 | 0.345742    | 0         |
| DVU1924     | 207393 | 0.688965    | 0         |
| DVU1925     | 207394 | 0.516799    | 0.931397  |
| DVU1926     | 207395 | 0.0674586   | 0.126511  |
| VIMSS207396 | 207396 | -0.0935527  | -0.155227 |
| DVU1927     | 207397 | -1.46084    | 0         |
| DVU1928     | 207398 | -0.711363   | -1.29252  |
| DVU1929     | 207399 | -1.69789    | 0         |
| DVU1930     | 207400 | -0.316451   | 0         |
| DVU1931     | 207401 | -0.156973   | -0.273885 |
| DVU1932     | 207402 | -0.151707   | -0.24255  |
| DVU1933     | 207403 | -0.507349   | 0         |
| DVU1934     | 207404 | -0.468614   | -0.83146  |
| DVU1935     | 207405 | -1.1981     | 0         |
| DVU1936     | 207406 | -0.479908   | -0.888495 |
| DVU1937     | 207407 | 0.0439636   | 0.0807414 |
| DVU1938     | 207408 | 0.0466677   | 0.0849965 |
| DVU1939     | 207409 | 0.229975    | 0.432412  |
| DVU1940     | 207410 | 0.405247    | 0.693474  |
| DVU1941     | 207411 | 0.417188    | 0.676308  |
| DVU1942     | 207412 | -0.74801    | -1.39554  |
| DVU1943     | 207413 | -0.663462   | -1.24882  |
| DVU1944     | 207414 | 1.94459     | 0         |
| DVU1945     | 207415 | 1.81456     | 0         |
| DVU1946     | 207416 | 1.86441     | 3.54678   |

|             |        |            |            |  |
|-------------|--------|------------|------------|--|
| DVU1947     | 207417 | 1.40514    | 0          |  |
| DVU1948     | 207418 | 0.349587   | 0.593849   |  |
| DVU1949     | 207419 | -0.924958  | 0          |  |
| DVU1950     | 207420 | -0.353548  | -0.661178  |  |
| DVU1951     | 207421 | -0.573707  | 0          |  |
| DVU1952     | 207422 | -0.374197  | -0.645427  |  |
| DVU1953     | 207423 | -0.35645   | -0.698207  |  |
| DVU1954     | 207424 | -0.910104  | -1.57204   |  |
| DVU1955     | 207425 | -0.518275  | 0          |  |
| DVU1956     | 207426 | -0.0843848 | -0.154489  |  |
| VIMSS207427 | 207427 | 0.0415721  | 0.0749692  |  |
| DVU1958     | 207428 | 1.37587    | 2.35216    |  |
| DVU1960     | 207430 | -0.482363  | -0.726164  |  |
| DVU1961     | 207431 | -0.0315086 | -0.0536318 |  |
| VIMSS207433 | 207433 | -0.476095  | -0.581894  |  |
| VIMSS207435 | 207435 | 0.520234   | 0          |  |
| VIMSS207436 | 207436 | 0.673925   | 0          |  |
| DVU1967     | 207437 | 0.673757   | 0          |  |
| DVU1968     | 207438 | 0.31482    | 0.411716   |  |
| DVU1969     | 207439 | -0.310415  | 0          |  |
| DVU1970     | 207440 | 0.600134   | 0.79017    |  |
| DVU1971     | 207441 | -1.02089   | 0          |  |
| DVU1975     | 207446 | -0.611449  | 0          |  |
| DVU1976     | 207447 | -1.52026   | -2.37809   |  |
| DVU1977     | 207448 | -0.6772    | -1.19239   |  |
| DVU1978     | 207449 | -0.920154  | -1.66049   |  |
| DVU1980     | 207451 | 0.59284    | 1.146      |  |
| DVU1981     | 207452 | -0.485038  | 0          |  |
| DVU1983     | 207454 | 0.1917     | 0          |  |
| DVU1984     | 207455 | 0.547342   | 1.03938    |  |
| DVU1985     | 207456 | -0.694365  | -1.16195   |  |
| DVU1986     | 207458 | 1.16891    | 0          |  |
| DVU1987     | 207459 | -0.481401  | -0.756561  |  |
| DVU1988     | 207460 | -0.57334   | -0.901387  |  |
| VIMSS207461 | 207461 | 0.00114991 | 0.00160212 |  |
| DVU1991     | 207463 | 0.492161   | 0          |  |
| DVU1992     | 207464 | -0.279842  | -0.480902  |  |
| DVU1993     | 207465 | 0.596015   | 1.11762    |  |
| VIMSS207466 | 207466 | 1.24772    | 1.83915    |  |
| DVU1995     | 207467 | 0.627827   | 0          |  |
| DVU2000     | 207472 | -0.276837  | -0.472546  |  |
| VIMSS207475 | 207475 | 1.66233    | 2.30763    |  |
| DVU2003     | 207476 | 0.426805   | 0.610933   |  |
| DVU2006     | 207479 | -1.03901   | 0          |  |
| DVU2007     | 207480 | -0.688593  | -1.0096    |  |
| DVU2008     | 207481 | 2.48741    | 0          |  |
| DVU2009     | 207482 | -0.554908  | -0.929003  |  |
| DVU2010     | 207483 | -0.987982  | -1.81139   |  |
| DVU2012     | 207485 | 1.53843    | 2.12608    |  |
| DVU2013     | 207486 | 1.19601    | 2.09174    |  |
| DVU2014     | 207487 | 1.32114    | 2.42196    |  |
| VIMSS207488 | 207488 | -0.260332  | -0.401231  |  |
| DVU2016     | 207489 | -0.36759   | -0.668983  |  |
| DVU2017     | 207490 | 0.0104023  | 0          |  |
| VIMSS207491 | 207491 | -0.804636  | -1.38555   |  |
| DVU2019     | 207492 | -0.390804  | -0.636815  |  |
| DVU2020     | 207493 | -0.356772  | -0.593493  |  |
| DVU2021     | 207494 | 0.173989   | 0.325131   |  |
| VIMSS207495 | 207495 | -0.0751699 | -0.122053  |  |
| DVU2023     | 207496 | -0.513143  | -0.843322  |  |
| DVU2024     | 207497 | 0.0705343  | 0.116829   |  |
| DVU2025     | 207498 | -1.019     | -1.69074   |  |
| DVU2026     | 207499 | 0.87248    | 1.52614    |  |
| VIMSS207500 | 207500 | 0.807936   | 0.701108   |  |
| DVU2028     | 207501 | 0.0430466  | 0.0565312  |  |
| VIMSS207504 | 207504 | 0.554603   | 1.04852    |  |
| DVU2032     | 207505 | 0.00621251 | 0.00869122 |  |
| DVU2033     | 207506 | 0.129059   | 0.143863   |  |
| DVU2034     | 207507 | 1.47422    | 1.24556    |  |
| DVU2035     | 207508 | 1.48273    | 2.58638    |  |
| DVU2036     | 207509 | 2.12559    | 3.34196    |  |
| DVU2037     | 207510 | 0.361952   | 0.499513   |  |

|             |        |            |            |
|-------------|--------|------------|------------|
| DVU2038     | 207511 | -0.222191  | -0.212942  |
| DVU2039     | 207512 | -0.139822  | -0.201794  |
| DVU2040     | 207513 | -0.950716  | -1.21578   |
| DVU2041     | 207514 | -0.11095   | -0.127929  |
| DVU2042     | 207515 | 0.131825   | 0.247617   |
| DVU2043     | 207516 | -0.523371  | -0.490916  |
| DVU2044     | 207517 | -0.155331  | -0.212295  |
| DVU2045     | 207518 | 0.0375338  | 0.053919   |
| DVU2046     | 207519 | 0.462704   | 0.690893   |
| VIMSS207520 | 207520 | 0.515581   | 0.429759   |
| DVU2048     | 207521 | 0.856761   | 1.5654     |
| DVU2049     | 207523 | 1.1198     | 2.15053    |
| DVU2051     | 207524 | -0.106055  | -0.170029  |
| DVU2052     | 207525 | -0.81065   | -0.971353  |
| DVU2053     | 207526 | -0.795683  | -1.52003   |
| DVU2054     | 207527 | -0.556728  | -0.964007  |
| DVU2055     | 207528 | -0.485654  | -0.911737  |
| VIMSS207529 | 207529 | -0.354727  | -0.616593  |
| DVU2057     | 207530 | -0.691474  | -1.21957   |
| DVU2058     | 207531 | -0.198014  | -0.298042  |
| DVU2059     | 207532 | -0.855104  | -1.45644   |
| DVU2060     | 207533 | -0.131476  | -0.220479  |
| DVU2061     | 207534 | 0.302142   | 0.530708   |
| DVU2062     | 207535 | 0.0308959  | 0.0506854  |
| DVU2063     | 207536 | -0.647071  | -1.08732   |
| DVU2064     | 207537 | -0.0584057 | -0.107015  |
| VIMSS207538 | 207538 | -0.418369  | -0.633213  |
| DVU2066     | 207539 | -0.638037  | -1.12771   |
| DVU2067     | 207540 | -0.313516  | -0.56461   |
| DVU2068     | 207541 | 0.359325   | 0.698074   |
| DVU2069     | 207543 | -0.417547  | -0.752231  |
| DVU2070     | 207544 | 0.0738744  | 0.1432     |
| DVU2071     | 207545 | -0.949975  | -1.72967   |
| DVU2073     | 207547 | 1.24007    | 2.36873    |
| DVU2074     | 207548 | 0.0907271  | 0.173106   |
| DVU2075     | 207549 | 0.656148   | 1.2256     |
| DVU2076     | 207550 | 0.397765   | 0.758946   |
| DVU2077     | 207551 | 0.516309   | 0.997063   |
| DVU2078     | 207552 | 0.391688   | 0.732865   |
| DVU2079     | 207553 | 0.504907   | 0.905471   |
| VIMSS207554 | 207554 | -0.126717  | -0.200807  |
| DVU2081     | 207555 | 0.256709   | 0.303061   |
| DVU2082     | 207556 | 0.362864   | 0.577282   |
| DVU2083     | 207557 | -0.884464  | -1.70963   |
| DVU2084     | 207558 | -0.0239437 | -0.0457803 |
| DVU2085     | 207559 | -1.26964   | -2.36031   |
| DVU2086     | 207560 | 0.886134   | 1.46711    |
| DVU2087     | 207561 | 0.131935   | 0.130799   |
| DVU2088     | 207562 | -0.0844267 | -0.140555  |
| VIMSS207563 | 207563 | 1.07166    | 0.924267   |
| VIMSS207564 | 207564 | 0.680913   | 0.677414   |
| DVU2090     | 207565 | 0.653982   | 0.811842   |
| DVU2091     | 207566 | -1.47778   | -2.7199    |
| DVU2092     | 207567 | -1.7781    | -3.00848   |
| DVU2093     | 207568 | -2.64533   | -4.43728   |
| DVU2096     | 207571 | -0.737603  | -1.12132   |
| DVU2097     | 207572 | 1.0985     | 1.34815    |
| DVU2098     | 207573 | -0.542308  | -0.852521  |
| DVU2099     | 207574 | 0.178264   | 0.256103   |
| DVU2100     | 207575 | 3.17125    | 5.52104    |
| VIMSS207576 | 207576 | 0.214707   | 0.407768   |
| DVU2101     | 207577 | 0.449891   | 0.768128   |
| DVU2102     | 207578 | 0.420865   | 0.783767   |
| DVU2104     | 207580 | 0.992991   | 1.78989    |
| DVU2105     | 207581 | 2.06183    | 0          |
| DVU2106     | 207582 | 0.0227084  | 0.0313277  |
| DVU2107     | 207583 | 0.0519032  | 0.0399227  |
| DVU2108     | 207584 | 0.391925   | 0.700151   |
| DVU2109     | 207585 | 0.485907   | 0          |
| DVU2110     | 207586 | 0.133618   | 0.192724   |
| DVU2111     | 207587 | -0.225555  | -0.369616  |
| DVU2112     | 207588 | 0.740867   | 1.40334    |

|             |        |            |            |
|-------------|--------|------------|------------|
| DVU2113     | 207589 | -0.962531  | -1.23333   |
| DVU2114     | 207590 | 1.01808    | 1.96987    |
| DVU2115     | 207591 | 1.44179    | 2.33331    |
| DVU2116     | 207593 | 1.16349    | 1.87346    |
| DVU2117     | 207594 | -0.0491383 | -0.0568173 |
| DVU2118     | 207595 | 1.04525    | 1.67273    |
| DVU2119     | 207596 | 0.347103   | 0.478785   |
| DVU2120     | 207597 | 0.514974   | 0.655303   |
| DVU2121     | 207598 | 0.414787   | 0.542105   |
| DVU2123     | 207600 | -0.135294  | 0          |
| DVU2124     | 207601 | 2.36335    | 2.34479    |
| DVU2125     | 207602 | 0.859555   | 0          |
| DVU2126     | 207603 | 0.4371     | 0.626433   |
| DVU2127     | 207604 | 0.702607   | 0.889545   |
| DVU2128     | 207605 | 0.0910335  | 0.165441   |
| DVU2130     | 207607 | 0.154465   | 0.284318   |
| DVU2131     | 207608 | -0.723398  | 0          |
| DVU2132     | 207609 | 0.0573631  | 0.0876632  |
| DVU2133     | 207610 | 0.537634   | 0          |
| DVU2135     | 207612 | 0.298314   | 0.340409   |
| DVU2136     | 207613 | 0.686921   | 0          |
| DVU2138     | 207615 | 0.318721   | 0.613285   |
| DVU2140     | 207617 | 0.103072   | 0.201579   |
| DVU2142     | 207619 | -0.40547   | -0.743609  |
| DVU2144     | 207621 | 0.0562211  | 0.097525   |
| DVU2145     | 207623 | -0.299849  | -0.520824  |
| DVU2146     | 207625 | -0.462267  | -0.788503  |
| DVU2147     | 207626 | -0.0585496 | 0          |
| DVU2148     | 207627 | 0.582714   | 1.02034    |
| DVU2149     | 207628 | -0.134772  | 0          |
| DVU2150     | 207629 | -1.10695   | -1.91207   |
| DVU2151     | 207630 | -0.199157  | 0          |
| DVU2152     | 207631 | 0.493494   | 0.847274   |
| DVU2154     | 207633 | 0.28261    | 0.364616   |
| DVU2155     | 207634 | 1.03845    | 0          |
| DVU2156     | 207635 | 0.549658   | 0          |
| DVU2157     | 207636 | 0.556381   | 0.876491   |
| DVU2160     | 207640 | 0.195824   | 0          |
| VIMSS207643 | 207643 | 0.579163   | 0.889999   |
| DVU2165     | 207645 | 0.92865    | 0          |
| DVU2166     | 207646 | 0.359384   | 0.521647   |
| DVU2168     | 207648 | -0.272372  | -0.369223  |
| DVU2171     | 207651 | 0.710419   | 0.985802   |
| DVU2172     | 207652 | 0.528903   | 0.649947   |
| DVU2173     | 207653 | 0.699089   | 0.675077   |
| DVU2175     | 207656 | -0.601597  | 0          |
| DVU2176     | 207658 | -0.170839  | -0.283349  |
| DVU2177     | 207659 | -0.616274  | -1.10951   |
| DVU2180     | 207663 | -0.47714   | -0.71837   |
| DVU2181     | 207664 | 0.0279313  | 0.0432533  |
| VIMSS207666 | 207666 | 0.483756   | 0          |
| DVU2184     | 207668 | -0.446411  | -0.660325  |
| DVU2185     | 207669 | -0.259305  | 0          |
| DVU2187     | 207671 | -0.138934  | -0.186049  |
| DVU2188     | 207672 | -0.113162  | 0          |
| DVU2189     | 207673 | 0.71803    | 0          |
| DVU2190     | 207674 | 0.711925   | 1.07403    |
| DVU2191     | 207675 | 0.635524   | 0.872173   |
| DVU2192     | 207676 | 0.83699    | 1.16342    |
| DVU2194     | 207678 | 1.33704    | 1.75342    |
| DVU2195     | 207679 | 0.872513   | 1.53739    |
| DVU2196     | 207680 | 0.721028   | 0.914493   |
| DVU2197     | 207681 | 0.529473   | 0.811818   |
| DVU2198     | 207682 | 0.669783   | 0          |
| VIMSS207683 | 207683 | 0.139104   | 0.165731   |
| DVU2200     | 207684 | -0.717697  | -1.23804   |
| DVU2202     | 207686 | 0.505588   | 0.854357   |
| DVU2203     | 207687 | -1.55934   | -2.57214   |
| DVU2204     | 207688 | -0.321961  | -0.553571  |
| DVU2205     | 207689 | -1.4247    | 0          |
| DVU2206     | 207690 | -1.63681   | -2.49317   |
| DVU2208     | 207692 | -0.301938  | -0.505777  |

|             |        |            |            |
|-------------|--------|------------|------------|
| DVU2209     | 207693 | -0.261332  | 0          |
| DVU2210     | 207694 | -1.28554   | -2.29365   |
| DVU2211     | 207695 | 0.344129   | 0.550843   |
| DVU2212     | 207696 | 0.868536   | 1.63665    |
| DVU2213     | 207697 | 0.865771   | 1.21699    |
| DVU2214     | 207698 | -0.230225  | -0.312441  |
| DVU2216     | 207700 | -0.162781  | -0.314092  |
| DVU2217     | 207701 | 0.417829   | 0.557229   |
| DVU2218     | 207702 | 0.705527   | 1.00318    |
| VIMSS207703 | 207703 | -0.226492  | -0.318     |
| DVU2220     | 207704 | -1.08851   | -1.83928   |
| DVU2221     | 207705 | 0.269975   | 0.478838   |
| DVU2222     | 207706 | -1.56382   | -2.61022   |
| DVU2223     | 207707 | -0.987161  | -1.83214   |
| DVU2224     | 207708 | 0.0203469  | 0.0327922  |
| DVU2225     | 207709 | -0.773245  | -1.33843   |
| DVU2226     | 207710 | -0.758903  | -1.30052   |
| DVU2227     | 207711 | -0.0525685 | -0.0976817 |
| DVU2228     | 207712 | 0.837282   | 1.51143    |
| DVU2229     | 207713 | 0.277843   | 0.476864   |
| DVU2230     | 207714 | -0.595947  | -1.06056   |
| DVU2231     | 207715 | -1.0785    | -1.96703   |
| DVU2232     | 207716 | 0.859802   | 1.66564    |
| DVU2233     | 207717 | -0.153358  | -0.287816  |
| DVU2234     | 207718 | -0.384814  | -0.627561  |
| DVU2235     | 207719 | -0.236621  | -0.458555  |
| DVU2236     | 207720 | 0.1184     | 0.221718   |
| DVU2237     | 207721 | -0.487821  | -0.785342  |
| DVU2238     | 207722 | 0.0717246  | 0.135253   |
| DVU2239     | 207723 | 1.04354    | 1.67467    |
| DVU2240     | 207724 | -0.227529  | -0.434554  |
| DVU2241     | 207725 | 0.155595   | 0.282485   |
| DVU2242     | 207726 | 0.110307   | 0.170781   |
| DVU2243     | 207727 | 0.210941   | 0.396592   |
| DVU2244     | 207728 | 0.24247    | 0.462923   |
| DVU2245     | 207729 | 0.400788   | 0.743089   |
| DVU2246     | 207731 | -0.760842  | -1.39689   |
| DVU2247     | 207732 | 0.630425   | 0.692221   |
| VIMSS207733 | 207733 | -0.129093  | -0.170124  |
| VIMSS207734 | 207734 | 1.14855    | 1.44596    |
| DVU2250     | 207735 | -0.318706  | -0.590931  |
| DVU2251     | 207736 | 1.16946    | 2.19717    |
| DVU2252     | 207737 | -0.636342  | -0.82687   |
| DVU2253     | 207738 | 0.913126   | 0.854926   |
| DVU2254     | 207739 | -0.307606  | -0.565712  |
| DVU2255     | 207740 | -0.408374  | -0.801139  |
| DVU2256     | 207741 | -0.306183  | -0.565314  |
| DVU2257     | 207742 | -1.62371   | -2.58476   |
| DVU2258     | 207743 | -1.23082   | -2.27126   |
| DVU2259     | 207744 | -1.03406   | -1.6744    |
| DVU2260     | 207745 | -0.74095   | -1.29775   |
| DVU2261     | 207746 | 0.00575671 | 0.0109514  |
| VIMSS207747 | 207747 | 0.799487   | 0.953577   |
| DVU2263     | 207748 | -0.011324  | -0.0203367 |
| DVU2264     | 207749 | 0.649006   | 1.22642    |
| VIMSS207750 | 207750 | -1.13838   | -2.02151   |
| VIMSS207751 | 207751 | 1.06745    | 0          |
| DVU2267     | 207752 | -0.105433  | -0.188401  |
| DVU2268     | 207753 | 0.565074   | 0.983833   |
| DVU2269     | 207754 | -0.189585  | -0.335383  |
| DVU2270     | 207755 | 0.150122   | 0.279896   |
| DVU2271     | 207756 | 0.634179   | 0.909261   |
| DVU2272     | 207757 | 0.258302   | 0.389842   |
| VIMSS207758 | 207758 | 0.21405    | 0.276235   |
| DVU2274     | 207759 | -0.252151  | -0.375216  |
| DVU2275     | 207760 | -1.35113   | -2.13979   |
| DVU2276     | 207761 | -0.843565  | -1.33438   |
| DVU2277     | 207762 | 0.43556    | 0.65342    |
| DVU2278     | 207763 | 1.5936     | 0          |
| VIMSS207764 | 207764 | -0.084307  | -0.139234  |
| DVU2279     | 207765 | 0.177858   | 0.236244   |
| DVU2280     | 207766 | -0.563175  | -0.937873  |

|             |        |              |              |  |
|-------------|--------|--------------|--------------|--|
| DVU2281     | 207767 | 1.53107      | 2.5697       |  |
| DVU2282     | 207768 | 0.975919     | 1.70742      |  |
| DVU2283     | 207769 | 0.837689     | 1.34478      |  |
| DVU2284     | 207770 | -0.153828    | -0.283958    |  |
| DVU2285     | 207771 | -3.53335     | -5.22275     |  |
| DVU2286     | 207772 | -3.2099      | -6.0347      |  |
| DVU2287     | 207774 | -3.25154     | -4.38343     |  |
| DVU2288     | 207775 | -3.14202     | -4.58788     |  |
| DVU2289     | 207776 | -2.86677     | -4.30687     |  |
| DVU2290     | 207777 | -2.90167     | -4.8817      |  |
| DVU2291     | 207778 | -2.54954     | -3.84877     |  |
| DVU2292     | 207779 | -1.99832     | -3.7528      |  |
| DVU2293     | 207780 | -1.68813     | -2.92856     |  |
| DVU2294     | 207781 | -0.752491    | -1.18447     |  |
| DVU2295     | 207782 | 0.26197      | 0.46937      |  |
| DVU2296     | 207783 | 0.411996     | 0.68147      |  |
| DVU2297     | 207784 | 0.670921     | 1.22291      |  |
| DVU2298     | 207785 | 0.0955069    | 0.181531     |  |
| DVU2299     | 207786 | 0.327469     | 0.611007     |  |
| DVU2300     | 207787 | -0.286704    | -0.426311    |  |
| DVU2301     | 207788 | -0.000119138 | -0.000150224 |  |
| DVU2302     | 207789 | 0.752223     | 1.35767      |  |
| DVU2303     | 207790 | 0.211366     | 0.394872     |  |
| VIMSS207791 | 207791 | 0.648528     | 1.14156      |  |
| DVU2305     | 207792 | -1.09767     | -1.75339     |  |
| DVU2306     | 207793 | -1.19783     | -2.1455      |  |
| DVU2307     | 207794 | -0.154666    | -0.280549    |  |
| DVU2308     | 207795 | -0.00619537  | -0.0118141   |  |
| DVU2309     | 207796 | 1.95843      | 3.68461      |  |
| DVU2310     | 207797 | -0.941608    | -1.42963     |  |
| VIMSS207798 | 207798 | -0.254673    | -0.234707    |  |
| DVU2312     | 207799 | 0.192965     | 0.360004     |  |
| DVU2313     | 207800 | 0.442379     | 0.784715     |  |
| VIMSS207801 | 207801 | 0.0945669    | 0.137875     |  |
| DVU2315     | 207802 | -0.331025    | -0.631637    |  |
| DVU2316     | 207803 | -0.329511    | -0.501576    |  |
| DVU2317     | 207804 | -0.250888    | -0.396591    |  |
| DVU2318     | 207805 | -1.74453     | -3.27502     |  |
| DVU2319     | 207806 | -0.0696786   | -0.117168    |  |
| DVU2320     | 207807 | -0.730417    | -1.3545      |  |
| VIMSS207808 | 207808 | -0.57202     | -0.891203    |  |
| DVU2322     | 207809 | 0.125153     | 0.220543     |  |
| DVU2323     | 207810 | -1.04286     | -1.85841     |  |
| DVU2324     | 207811 | 0.528583     | 0.817567     |  |
| DVU2325     | 207812 | 0.835081     | 1.34929      |  |
| DVU2326     | 207813 | -0.0230751   | 0            |  |
| VIMSS207814 | 207814 | 0.12203      | 0.147022     |  |
| DVU2328     | 207815 | -0.0984949   | -0.184449    |  |
| DVU2329     | 207816 | -0.583916    | -1.12785     |  |
| DVU2330     | 207817 | -0.167414    | -0.316028    |  |
| DVU2331     | 207818 | -0.0126965   | -0.0230905   |  |
| DVU2332     | 207819 | -0.0156479   | -0.0300877   |  |
| DVU2333     | 207820 | -1.00567     | -1.7531      |  |
| VIMSS207821 | 207821 | 0.481708     | 0.786282     |  |
| DVU2335     | 207822 | -2.04106     | -3.56338     |  |
| DVU2336     | 207823 | -0.229765    | -0.37269     |  |
| DVU2337     | 207824 | 0.0619598    | 0.110888     |  |
| DVU2338     | 207825 | 0.480913     | 0.902277     |  |
| DVU2339     | 207826 | -0.474305    | -0.881651    |  |
| DVU2340     | 207827 | -0.215364    | -0.355999    |  |
| DVU2341     | 207828 | 0.885943     | 1.5805       |  |
| DVU2342     | 207829 | 1.28147      | 2.3469       |  |
| DVU2343     | 207830 | 0.529677     | 0.855298     |  |
| VIMSS207832 | 207832 | 0.832881     | 1.06726      |  |
| DVU2345     | 207833 | 2.49907      | 4.36768      |  |
| VIMSS207834 | 207834 | 1.46346      | 1.74571      |  |
| DVU2347     | 207835 | -0.354737    | -0.647864    |  |
| DVU2348     | 207836 | -0.687702    | -1.1044      |  |
| DVU2349     | 207837 | 1.64248      | 2.94484      |  |
| DVU2350     | 207838 | 0.059979     | 0.0971783    |  |
| DVU2351     | 207839 | 0.787492     | 1.41258      |  |
| DVU2352     | 207840 | 0.0609192    | 0.110164     |  |

|             |        |            |           |  |
|-------------|--------|------------|-----------|--|
| DVU2353     | 207841 | 0.28806    | 0.493366  |  |
| DVU2354     | 207842 | 0.086627   | 0.166344  |  |
| DVU2355     | 207843 | -0.70682   | -1.24382  |  |
| DVU2356     | 207844 | -0.363461  | -0.671707 |  |
| DVU2357     | 207845 | 1.02514    | 1.89593   |  |
| VIMSS207846 | 207846 | -0.338877  | -0.585083 |  |
| DVU2359     | 207847 | 0.285147   | 0.471448  |  |
| DVU2360     | 207848 | 1.0024     | 1.9226    |  |
| VIMSS207849 | 207849 | 0.405708   | 0.751321  |  |
| DVU2363     | 207850 | 0.522518   | 0.936532  |  |
| DVU2362     | 207851 | 0.787808   | 1.34333   |  |
| DVU2364     | 207852 | -1.4669    | -2.35725  |  |
| DVU2365     | 207853 | -0.635248  | -1.02128  |  |
| VIMSS207854 | 207854 | 1.54657    | 2.91423   |  |
| DVU2367     | 207855 | -0.873975  | -1.58505  |  |
| DVU2368     | 207856 | -0.773037  | -1.50236  |  |
| DVU2369     | 207857 | -0.652909  | -1.1485   |  |
| DVU2370     | 207858 | -0.840117  | -1.47816  |  |
| DVU2371     | 207859 | -0.61371   | -1.10342  |  |
| DVU2372     | 207860 | -0.149277  | -0.268802 |  |
| DVU2373     | 207861 | -1.7746    | 0         |  |
| DVU2374     | 207862 | -2.07673   | -4.01263  |  |
| DVU2375     | 207863 | -1.46141   | -2.64044  |  |
| DVU2376     | 207864 | -1.74139   | -3.08672  |  |
| DVU2377     | 207865 | -0.123787  | -0.201338 |  |
| DVU2378     | 207866 | 0.764159   | 1.16071   |  |
| DVU2379     | 207867 | 0.767779   | 1.43646   |  |
| DVU2380     | 207868 | 0.283254   | 0.434466  |  |
| DVU2381     | 207869 | -0.122401  | -0.174742 |  |
| DVU2382     | 207870 | 0.178067   | 0.257743  |  |
| DVU2383     | 207871 | -0.236993  | -0.351688 |  |
| DVU2384     | 207872 | 1.86419    | 3.40967   |  |
| DVU2385     | 207873 | 1.95923    | 3.59427   |  |
| DVU2386     | 207874 | 0.445462   | 0.767295  |  |
| DVU2387     | 207875 | 2.0254     | 3.7965    |  |
| DVU2388     | 207876 | -0.369433  | -0.688574 |  |
| DVU2389     | 207877 | 0.38366    | 0.647974  |  |
| DVU2390     | 207879 | 0.662311   | 1.15713   |  |
| DVU2391     | 207881 | 1.13438    | 1.04773   |  |
| VIMSS207882 | 207882 | 1.39638    | 2.17722   |  |
| DVU2392     | 207883 | 0.914533   | 1.73166   |  |
| VIMSS207884 | 207884 | 0.507439   | 0.855274  |  |
| DVU2394     | 207885 | 0.536322   | 0.980949  |  |
| DVU2395     | 207886 | 0.916751   | 1.79349   |  |
| DVU2396     | 207887 | 0.0997483  | 0.182356  |  |
| DVU2397     | 207888 | 1.03704    | 1.97423   |  |
| DVU2398     | 207889 | 1.57813    | 2.96194   |  |
| DVU2399     | 207890 | 0.408753   | 0.795032  |  |
| DVU2400     | 207891 | 0.780627   | 1.40906   |  |
| DVU2401     | 207892 | 1.03707    | 1.81641   |  |
| DVU2402     | 207893 | 1.27668    | 2.33696   |  |
| DVU2403     | 207894 | 1.0811     | 1.924     |  |
| DVU2404     | 207895 | 1.36287    | 2.59785   |  |
| DVU2407     | 207898 | 0.711889   | 1.09988   |  |
| DVU2408     | 207899 | 1.14521    | 1.94922   |  |
| DVU2409     | 207900 | 0.458439   | 0.897959  |  |
| DVU2410     | 207901 | 1.79921    | 3.0609    |  |
| DVU2411     | 207902 | 0.79407    | 1.49898   |  |
| DVU2412     | 207903 | -0.716616  | -1.22436  |  |
| DVU2413     | 207904 | -0.413539  | -0.78519  |  |
| DVU2414     | 207905 | 0.873975   | 1.55572   |  |
| DVU2416     | 207907 | 0.648919   | 1.26554   |  |
| DVU2417     | 207908 | 0.119388   | 0.225309  |  |
| DVU2418     | 207909 | 0.484324   | 0.755452  |  |
| DVU2419     | 207910 | 0.00621645 | 0.0100503 |  |
| DVU2420     | 207911 | -0.4735    | -0.930697 |  |
| DVU2421     | 207912 | 1.15717    | 2.25274   |  |
| DVU2422     | 207913 | 1.33733    | 2.44097   |  |
| VIMSS207914 | 207914 | 1.04595    | 1.47848   |  |
| DVU2423     | 207915 | 1.38997    | 2.56071   |  |
| DVU2424     | 207916 | 0.582506   | 1.07486   |  |
| DVU2425     | 207917 | -0.477848  | -0.85019  |  |

|             |        |             |             |
|-------------|--------|-------------|-------------|
| VIMSS207918 | 207918 | 0.629271    | 0.790462    |
| DVU2427     | 207919 | 0.550555    | 1.02622     |
| DVU2428     | 207920 | 0.0621366   | 0.113253    |
| DVU2429     | 207921 | 0.443898    | 0.747707    |
| DVU2431     | 207923 | 0.418034    | 0.710238    |
| DVU2432     | 207924 | 0.779651    | 1.27324     |
| VIMSS207925 | 207925 | -1.27621    | -1.6292     |
| DVU2434     | 207926 | -0.68586    | -1.0001     |
| DVU2435     | 207927 | 0.000174724 | 0.000326197 |
| DVU2436     | 207928 | -0.762182   | -1.38189    |
| DVU2437     | 207929 | 0.073477    | 0.127772    |
| VIMSS207931 | 207931 | -0.321538   | -0.591988   |
| DVU2439     | 207932 | 1.15847     | 2.21161     |
| DVU2440     | 207933 | -0.159637   | -0.24128    |
| DVU2441     | 207934 | 1.57668     | 2.98462     |
| DVU2442     | 207935 | 1.24969     | 2.1579      |
| DVU2443     | 207936 | -0.306117   | -0.488365   |
| DVU2444     | 207937 | 0.229603    | 0.362208    |
| VIMSS207938 | 207938 | -0.0771412  | -0.127049   |
| DVU2446     | 207939 | 0.989332    | 1.912       |
| DVU2447     | 207940 | 0.356783    | 0.621833    |
| DVU2448     | 207941 | -0.555956   | -0.955869   |
| DVU2449     | 207942 | -0.995462   | -1.81108    |
| DVU2450     | 207943 | 0.308849    | 0.535221    |
| VIMSS207945 | 207945 | -1.16876    | -1.62193    |
| DVU2454     | 207946 | 0.352881    | 0.554636    |
| VIMSS207947 | 207947 | 0.744293    | 1.01606     |
| DVU2455     | 207948 | 1.14709     | 2.16176     |
| VIMSS207951 | 207951 | 0.90033     | 0.958051    |
| VIMSS207952 | 207952 | 1.25993     | 2.066       |
| DVU2459     | 207953 | 1.43225     | 2.64217     |
| DVU2460     | 207954 | 0.588979    | 1.06247     |
| DVU2461     | 207955 | 0.26629     | 0.496939    |
| DVU2462     | 207956 | -0.383159   | -0.600731   |
| DVU2463     | 207957 | -0.604712   | -1.08921    |
| DVU2464     | 207958 | -0.324833   | -0.598387   |
| VIMSS207959 | 207959 | 1.24199     | 1.85965     |
| DVU2466     | 207960 | -0.4459     | -0.679437   |
| DVU2467     | 207961 | 0.511476    | 0.956763    |
| VIMSS207962 | 207962 | 0.918363    | 1.34222     |
| DVU2468     | 207963 | -0.29772    | -0.53175    |
| DVU2470     | 207964 | 0.410601    | 0.753909    |
| DVU2471     | 207966 | -0.108795   | -0.200354   |
| DVU2472     | 207967 | 0.850693    | 1.47704     |
| DVU2473     | 207968 | 0.413187    | 0.689083    |
| DVU2474     | 207969 | 0.00214006  | 0.00387235  |
| DVU2475     | 207970 | 0.226323    | 0.427828    |
| DVU2476     | 207971 | 1.33333     | 2.42872     |
| DVU2477     | 207972 | 0.294559    | 0.457621    |
| DVU2478     | 207973 | 0.671379    | 1.02478     |
| DVU2479     | 207974 | -0.104151   | -0.154498   |
| VIMSS207975 | 207975 | 0.947535    | 1.32775     |
| DVU2481     | 207976 | 1.30175     | 2.39429     |
| VIMSS207977 | 207977 | 0.774801    | 1.23489     |
| DVU2482     | 207978 | 0.963914    | 1.72734     |
| DVU2483     | 207980 | 0.801096    | 1.32372     |
| DVU2484     | 207981 | 1.34301     | 2.49459     |
| DVU2485     | 207982 | 1.17672     | 2.11686     |
| DVU2486     | 207983 | 1.00927     | 1.76002     |
| DVU2487     | 207984 | 0.570433    | 1.03479     |
| VIMSS207985 | 207985 | -0.250129   | -0.402355   |
| DVU2489     | 207986 | 0.63276     | 1.03231     |
| DVU2490     | 207987 | 0.0546903   | 0.100189    |
| DVU2491     | 207988 | -0.345272   | -0.647403   |
| DVU2492     | 207989 | -0.541568   | -0.862438   |
| DVU2493     | 207990 | -1.18372    | -2.05256    |
| DVU2494     | 207991 | 0.682859    | 1.25794     |
| DVU2495     | 207992 | 0.730063    | 1.36782     |
| DVU2496     | 207993 | -0.22401    | -0.429827   |
| DVU2497     | 207994 | 1.23426     | 2.27635     |
| DVU2498     | 207995 | 1.01769     | 1.8555      |
| DVU2500     | 207997 | -0.64589    | -1.20024    |



|             |        |             |             |
|-------------|--------|-------------|-------------|
| DVU2501     | 207998 | -0.981157   | -1.71483    |
| DVU2502     | 207999 | -0.64621    | -1.06848    |
| DVU2503     | 208000 | -0.814383   | -1.47998    |
| DVU2504     | 208001 | -0.990951   | -1.7984     |
| DVU2505     | 208002 | -0.865673   | -1.45378    |
| DVU2506     | 208003 | -1.2158     | -1.88612    |
| DVU2507     | 208004 | -0.61709    | -1.03849    |
| DVU2508     | 208005 | -0.489736   | -0.964556   |
| DVU2509     | 208006 | -0.143423   | -0.270911   |
| DVU2510     | 208007 | -0.20062    | -0.305872   |
| DVU2511     | 208008 | 0.17179     | 0.336956    |
| DVU2512     | 208009 | 0.174516    | 0.32425     |
| DVU2513     | 208010 | 0.262411    | 0.497037    |
| DVU2514     | 208011 | 0.159581    | 0.289603    |
| DVU2515     | 208012 | 0.501357    | 0.918673    |
| DVU2516     | 208013 | 0.489183    | 0.93193     |
| DVU2517     | 208014 | 0.84366     | 1.32226     |
| DVU2518     | 208015 | -1.28473    | -2.00505    |
| DVU2519     | 208016 | -1.08732    | -1.69254    |
| VIMSS208017 | 208017 | -0.771098   | -1.30626    |
| DVU2521     | 208018 | -0.0846741  | -0.150362   |
| DVU2522     | 208019 | -0.546559   | -1.06547    |
| DVU2523     | 208020 | 0.718936    | 1.35616     |
| DVU2524     | 208021 | 1.1953      | 1.84084     |
| DVU2525     | 208022 | 0.294887    | 0.492056    |
| DVU2526     | 208023 | 0.600402    | 0.987523    |
| DVU2527     | 208024 | -0.295818   | -0.449891   |
| DVU2528     | 208025 | -0.1074     | -0.138974   |
| DVU2529     | 208026 | 0.628261    | 0.984903    |
| DVU2530     | 208027 | -0.683336   | -1.08745    |
| DVU2531     | 208028 | -0.00188016 | -0.00301466 |
| DVU2532     | 208029 | 0.312536    | 0.599561    |
| DVU2533     | 208030 | -0.541783   | -0.956243   |
| DVU2534     | 208031 | -0.725192   | -1.3839     |
| DVU2535     | 208032 | -0.695344   | -1.16059    |
| DVU2536     | 208033 | -0.469691   | -0.829143   |
| DVU2537     | 208034 | -0.307231   | -0.551597   |
| DVU2538     | 208035 | -0.409163   | -0.603396   |
| DVU2540     | 208037 | 0.159077    | 0.234089    |
| DVU2541     | 208038 | 0.202608    | 0.32355     |
| VIMSS208039 | 208039 | 0.218537    | 0.2121      |
| DVU2543     | 208040 | 2.27167     | 3.32877     |
| DVU2544     | 208041 | 0.813166    | 1.4708      |
| DVU2545     | 208042 | 0.305944    | 0.569552    |
| DVU2546     | 208043 | 0.38562     | 0.694738    |
| DVU2547     | 208044 | 0.819675    | 1.52752     |
| DVU2548     | 208045 | 1.26056     | 2.28734     |
| DVU2549     | 208046 | 0.0553295   | 0           |
| DVU2551     | 208048 | 0.953666    | 1.82655     |
| DVU2552     | 208049 | -1.33837    | -2.46383    |
| DVU2553     | 208050 | -0.676526   | -1.22857    |
| DVU2554     | 208051 | -0.259597   | -0.491908   |
| DVU2555     | 208052 | -1.32942    | -2.5031     |
| DVU2556     | 208053 | 1.31549     | 2.44216     |
| DVU2557     | 208054 | 0.435022    | 0.739228    |
| DVU2558     | 208055 | -1.28272    | -2.07328    |
| DVU2559     | 208056 | -0.101053   | -0.136042   |
| DVU2560     | 208057 | -0.409962   | -0.561951   |
| DVU2561     | 208058 | 0.343645    | 0.504705    |
| DVU2562     | 208059 | -0.541511   | -0.903775   |
| DVU2563     | 208060 | 0.0560499   | 0.0683996   |
| DVU2564     | 208061 | 1.5232      | 2.15125     |
| DVU2565     | 208062 | -0.494666   | -0.664828   |
| DVU2566     | 208063 | -1.03569    | -1.63957    |
| DVU2567     | 208064 | -0.785498   | -1.14139    |
| DVU2568     | 208065 | -0.336616   | -0.616991   |
| DVU2569     | 208066 | 0.0612214   | 0.112557    |
| DVU2570     | 208067 | 0.155015    | 0.280854    |
| DVU2571     | 208068 | 0.67314     | 1.06321     |
| DVU2572     | 208069 | 1.39688     | 1.93273     |
| DVU2573     | 208070 | 2.30313     | 2.5652      |
| DVU2574     | 208071 | 1.8475      | 2.13152     |

|             |        |                  |            |
|-------------|--------|------------------|------------|
| DVU2575     | 208072 | -0.413608        | -0.748323  |
| DVU2576     | 208073 | -0.120913        | -0.211226  |
| DVU2577     | 208074 | 0.326747         | 0.518805   |
| DVU2578     | 208075 | 1.06322 0        |            |
| DVU2579     | 208077 | -0.178758        | -0.321436  |
| DVU2580     | 208078 | -0.515161        | -0.852065  |
| DVU2581     | 208079 | -0.348156        | -0.616935  |
| DVU2582     | 208080 | -0.760517        | -1.18293   |
| DVU2583     | 208081 | 0.565851         | 0          |
| DVU2584     | 208082 | -0.762427        | -1.09677   |
| DVU2585     | 208083 | 1.31971 2.49979  |            |
| DVU2586     | 208085 | -1.05275         | -1.59023   |
| DVU2587     | 208086 | 0.179694         | 0.314458   |
| DVU2588     | 208087 | 0.799872         | 1.39543    |
| VIMSS208088 | 208088 | 0.0105295        | 0.0150832  |
| DVU2590     | 208089 | 0.43995 0.82441  |            |
| DVU2591     | 208090 | -0.282796        | -0.529251  |
| DVU2592     | 208091 | -0.0867549       | -0.108828  |
| VIMSS208092 | 208092 | -0.0788362       | -0.13674   |
| VIMSS208093 | 208093 | -0.0305945       | -0.0536017 |
| DVU2595     | 208094 | 0.514338         | 0.573024   |
| VIMSS208095 | 208095 | 0.644177         | 0.803738   |
| DVU2596     | 208096 | 0.874005         | 1.01696    |
| DVU2598     | 208097 | 0.264623         | 0          |
| DVU2600     | 208099 | 0.59274 0        |            |
| DVU2603     | 208102 | 0.522112         | 0.755575   |
| DVU2604     | 208103 | -0.176335        | 0          |
| DVU2605     | 208104 | 0.516779         | 0.883361   |
| DVU2606     | 208105 | 0.196664         | 0          |
| DVU2607     | 208106 | 0.128995         | 0.252268   |
| DVU2609     | 208108 | 0.239146         | 0.411375   |
| DVU2610     | 208109 | -0.598623        | 0          |
| DVU2612     | 208111 | -0.459438        | -0.857718  |
| DVU2613     | 208112 | -0.0954266       | -0.177114  |
| DVU2615     | 208114 | 1.76688 3.32736  |            |
| DVU2616     | 208115 | 0.629921         | 0          |
| DVU2617     | 208116 | -0.500168        | -0.940607  |
| DVU2619     | 208118 | -0.272721        | -0.43069   |
| DVU2620     | 208119 | -0.556729        | 0          |
| DVU2621     | 208120 | -0.905035        | -1.58265   |
| DVU2622     | 208121 | 1.23947 0        |            |
| DVU2623     | 208122 | 0.38282 0.563606 |            |
| DVU2624     | 208123 | 0.275952         | 0.359855   |
| DVU2625     | 208124 | 0.340923         | 0.575642   |
| DVU2626     | 208125 | 1.83836 2.70532  |            |
| DVU2628     | 208127 | -0.103572        | 0          |
| DVU2629     | 208128 | 0.504364         | 0.804605   |
| DVU2630     | 208129 | 0.612071         | 0          |
| DVU2631     | 208130 | 0.767662         | 1.15573    |
| VIMSS208131 | 208131 | 0.321505         | 0.418487   |
| DVU2633     | 208132 | -0.948352        | -1.53545   |
| DVU2634     | 208133 | 0.284963         | 0.514513   |
| DVU2635     | 208134 | 0.441041         | 0.783211   |
| DVU2638     | 208137 | -0.164236        | -0.275596  |
| DVU2639     | 208138 | -0.39181         | -0.7139    |
| DVU2641     | 208140 | 0.0820593        | 0.151352   |
| DVU2643     | 208142 | 0.506923         | 0.884849   |
| DVU2644     | 208143 | 0.195024         | 0.28104    |
| DVU2645     | 208144 | 0.232396         | 0.341871   |
| DVU2646     | 208145 | 0.1896 0         |            |
| DVU2647     | 208146 | 0.986162         | 1.42094    |
| DVU2649     | 208148 | -0.0897852       | -0.117527  |
| DVU2651     | 208150 | 0.469231         | 0.388647   |
| DVU2652     | 208151 | -0.594727        | -1.09595   |
| VIMSS208152 | 208152 | -0.544562        | -0.838523  |
| VIMSS208153 | 208153 | -0.191968        | -0.23292   |
| DVU2655     | 208154 | 0.736259         | 1.31776    |
| VIMSS208155 | 208155 | -0.341015        | 0          |
| DVU2657     | 208156 | 1.16008 2.14738  |            |
| DVU2658     | 208157 | 0.455541         | 0          |
| DVU2659     | 208158 | -0.180785        | -0.328835  |
| VIMSS208159 | 208159 | -0.669647        | 0          |

|             |        |            |           |
|-------------|--------|------------|-----------|
| DVU2661     | 208160 | 0.579139   | 1.06153   |
| DVU2663     | 208162 | 1.31207    | 1.85223   |
| DVU2665     | 208164 | 1.08851    | 1.65089   |
| DVU2666     | 208165 | 2.18659    | 0         |
| DVU2667     | 208166 | 0.664722   | 0.873182  |
| DVU2668     | 208167 | 0.364056   | 0         |
| DVU2669     | 208168 | 0.286372   | 0.497932  |
| DVU2670     | 208169 | 0.26313    | 0.483227  |
| DVU2671     | 208170 | -0.992627  | -1.91421  |
| DVU2673     | 208172 | 0.0194126  | 0.0331058 |
| DVU2674     | 208173 | -1.00941   | -1.79523  |
| DVU2675     | 208174 | 2.19048    | 3.93804   |
| DVU2676     | 208175 | 1.53584    | 2.89113   |
| DVU2677     | 208176 | -0.259338  | -0.472588 |
| DVU2678     | 208177 | -0.574322  | -1.03886  |
| DVU2679     | 208178 | 0.590893   | 0.983963  |
| DVU2680     | 208179 | 0.569731   | 0.903307  |
| VIMSS208180 | 208180 | 0.74334    | 1.14356   |
| DVU2682     | 208181 | -1.1575    | 0         |
| DVU2683     | 208183 | -1.31982   | -2.31724  |
| DVU2684     | 208184 | 1.32184    | 0         |
| VIMSS208185 | 208185 | 1.04583    | 1.57084   |
| DVU2686     | 208186 | 0.419648   | 0         |
| DVU2687     | 208188 | 1.47615    | 2.59908   |
| DVU2688     | 208189 | 0.296423   | 0         |
| DVU2689     | 208190 | 0.731199   | 1.10038   |
| DVU2690     | 208191 | 1.1906     | 0         |
| DVU2691     | 208192 | 0.985893   | 1.45213   |
| DVU2693     | 208194 | -0.153554  | 0         |
| DVU2694     | 208195 | -0.102459  | -0.144944 |
| DVU2696     | 208197 | 0.616608   | 1.06979   |
| DVU2698     | 208199 | 0.588111   | 0.632376  |
| DVU2700     | 208201 | -0.186979  | -0.311005 |
| DVU2701     | 208202 | 0.0292502  | 0.0464424 |
| DVU2702     | 208203 | 0.175036   | 0.314243  |
| DVU2703     | 208204 | 0.472269   | 0.637054  |
| DVU2704     | 208205 | 0.844835   | 0         |
| DVU2705     | 208206 | -0.109987  | -0.173378 |
| DVU2706     | 208207 | 1.97912    | 0         |
| DVU2707     | 208208 | -0.52716   | 0         |
| DVU2708     | 208209 | 0.65398    | 1.00875   |
| VIMSS208210 | 208210 | -1.57433   | 0         |
| DVU2712     | 208215 | 0.192973   | 0.366324  |
| DVU2714     | 208217 | -0.0715776 | -0.100364 |
| DVU2715     | 208218 | 0.81165    | 0         |
| DVU2716     | 208219 | -0.257685  | -0.352642 |
| DVU2717     | 208220 | -0.74287   | 0         |
| VIMSS208221 | 208221 | 1.09634    | 1.5445    |
| DVU2719     | 208222 | 0.172816   | 0         |
| DVU2720     | 208223 | 0.574127   | 0.890274  |
| DVU2721     | 208225 | 0.724339   | 1.20892   |
| DVU2722     | 208226 | 0.260986   | 0.398524  |
| DVU2723     | 208227 | 0.00945777 | 0.0164799 |
| DVU2724     | 208228 | 1.36447    | 1.53264   |
| VIMSS208231 | 208231 | -0.50075   | -0.892709 |
| DVU2727     | 208232 | -0.637713  | -0.996312 |
| DVU2728     | 208233 | -0.192549  | -0.33909  |
| DVU2729     | 208234 | 0.497553   | 0.616687  |
| DVU2730     | 208235 | -0.256067  | -0.446129 |
| DVU2731     | 208236 | -0.112878  | -0.182467 |
| DVU2732     | 208237 | 0.0222455  | 0         |
| DVU2733     | 208238 | -0.130444  | -0.166717 |
| VIMSS208240 | 208240 | 0.624476   | 1.18586   |
| DVU2735     | 208241 | 0.0295774  | 0         |
| DVU2736     | 208242 | 0.400108   | 0         |
| DVU2737     | 208243 | -0.176948  | 0         |
| DVU2738     | 208244 | 0.177384   | 0.33261   |
| DVU2739     | 208245 | 1.03572    | 0         |
| DVU2741     | 208247 | 0.537627   | 0         |
| DVU2742     | 208248 | 0.306378   | 0.452175  |
| DVU2743     | 208249 | -0.257179  | 0         |
| DVU2744     | 208250 | 0.472152   | 0.853305  |

|             |        |            |            |
|-------------|--------|------------|------------|
| VIMSS208251 | 208251 | -1.39962   | 0          |
| DVU2746     | 208252 | 0.689399   | 1.18624    |
| DVU2747     | 208253 | 0.408958   | 0.782284   |
| DVU2748     | 208254 | -0.92293   | -1.63637   |
| DVU2749     | 208255 | -0.273716  | 0          |
| DVU2750     | 208256 | -0.897579  | 0          |
| DVU2751     | 208257 | -0.0941322 | -0.143646  |
| DVU2752     | 208258 | 0.0022549  | 0.00414201 |
| DVU2753     | 208259 | 0.388534   | 0.638619   |
| DVU2755     | 208261 | 0.613483   | 0          |
| DVU2756     | 208262 | -0.165264  | -0.266577  |
| DVU2757     | 208263 | 0.0981697  | 0          |
| DVU2758     | 208264 | 0.863998   | 0          |
| VIMSS208265 | 208265 | -0.0647133 | 0          |
| DVU2760     | 208266 | 0.654369   | 0.951502   |
| DVU2761     | 208267 | 0.89078    | 1.46949    |
| DVU2762     | 208268 | 0.376046   | 0.664997   |
| DVU2764     | 208269 | 0.0624022  | 0          |
| DVU2763     | 208270 | 0.235361   | 0.419555   |
| DVU2765     | 208271 | 0.279703   | 0          |
| DVU2766     | 208272 | -0.552824  | -0.892619  |
| DVU2767     | 208273 | 0.441647   | 0          |
| DVU2768     | 208274 | 0.144063   | 0.221825   |
| DVU2769     | 208275 | 0.67091    | 1.19366    |
| DVU2771     | 208277 | 0.235714   | 0          |
| DVU2772     | 208278 | -0.0889344 | -0.158596  |
| DVU2773     | 208279 | 0.159161   | 0          |
| DVU2774     | 208280 | 0.53809    | 0          |
| DVU2775     | 208281 | 0.0551512  | 0          |
| DVU2776     | 208282 | -1.09483   | -1.72164   |
| DVU2779     | 208285 | -0.051076  | -0.099144  |
| DVU2780     | 208286 | -0.0975857 | -0.152558  |
| DVU2781     | 208287 | 0.957664   | 0          |
| VIMSS208288 | 208288 | 0.750713   | 1.22935    |
| DVU2783     | 208289 | -0.0673654 | 0          |
| DVU2784     | 208290 | -0.0782858 | 0          |
| DVU2787     | 208293 | 0.500391   | 0          |
| DVU2788     | 208294 | 0.827786   | 1.227      |
| DVU2789     | 208295 | 0.798743   | 0          |
| DVU2790     | 208296 | 0.721332   | 1.10988    |
| DVU2792     | 208298 | 1.31676    | 2.23275    |
| DVU2793     | 208299 | 1.53497    | 0          |
| DVU2794     | 208300 | 1.34701    | 2.45381    |
| DVU2795     | 208301 | 0.894722   | 0          |
| DVU2796     | 208302 | 1.3547     | 2.37701    |
| DVU2797     | 208303 | 1.01192    | 0          |
| DVU2798     | 208304 | 1.53489    | 3.00994    |
| DVU2799     | 208305 | -1.10795   | 0          |
| DVU2800     | 208306 | -0.913705  | -1.61922   |
| DVU2801     | 208309 | -0.274336  | 0          |
| DVU2802     | 208310 | 0.190842   | 0          |
| DVU2805     | 208313 | -0.91805   | -1.11251   |
| DVU2806     | 208314 | -1.21713   | -1.6419    |
| DVU2807     | 208315 | -1.92797   | -2.01046   |
| DVU2809     | 208317 | -0.17704   | 0          |
| DVU2810     | 208318 | -0.523921  | -0.645055  |
| DVU2811     | 208319 | 0.51903    | 0.696887   |
| DVU2812     | 208320 | 0.3861     | 0.506451   |
| VIMSS208322 | 208322 | 2.2557     | 0          |
| VIMSS208323 | 208323 | 0.323945   | 0.419833   |
| DVU2815     | 208324 | -0.0372718 | -0.0570291 |
| DVU2816     | 208325 | 0.125149   | 0.211094   |
| DVU2817     | 208327 | 0.385451   | 0.612657   |
| DVU2819     | 208328 | -0.0418458 | 0          |
| DVU2821     | 208330 | -0.659895  | -0.928116  |
| DVU2822     | 208331 | -0.61972   | -1.07777   |
| DVU2824     | 208333 | -0.910476  | -1.46425   |
| DVU2825     | 208334 | 0.0789957  | 0.138439   |
| VIMSS208335 | 208335 | 0.301473   | 0.447674   |
| DVU2827     | 208336 | 0.657546   | 0          |
| DVU2829     | 208338 | -0.588652  | 0          |
| DVU2830     | 208339 | 0.152953   | 0.247636   |

|             |        |            |             |  |
|-------------|--------|------------|-------------|--|
| DVU2831     | 208340 | 0.19451    | 0.345527    |  |
| DVU2832     | 208341 | 0.256009   | 0.402528    |  |
| DVU2833     | 208342 | 0.854936   | 0           |  |
| VIMSS208343 | 208343 | -0.266591  | -0.426476   |  |
| DVU2835     | 208344 | -0.402419  | -0.700366   |  |
| DVU2836     | 208345 | 0.113313   | 0.199083    |  |
| DVU2837     | 208346 | -0.522373  | 0           |  |
| DVU2838     | 208347 | -1.90171   | -3.47029    |  |
| DVU2839     | 208348 | -0.194584  | 0           |  |
| DVU2842     | 208351 | -0.195426  | -0.37045    |  |
| DVU2844     | 208353 | -0.111511  | -0.190309   |  |
| DVU2846     | 208355 | 0.617569   | 1.02671     |  |
| DVU2847     | 208356 | -0.0896082 | -0.131582   |  |
| DVU2849     | 208358 | 0.0775694  | 0.118565    |  |
| DVU2850     | 208359 | -0.722801  | -1.05625    |  |
| DVU2851     | 208360 | -0.737032  | -1.22804    |  |
| DVU2852     | 208361 | -0.535149  | -0.874012   |  |
| DVU2853     | 208362 | -0.724563  | -1.17987    |  |
| DVU2854     | 208363 | 0.200187   | 0.307761    |  |
| DVU2855     | 208364 | 0.21333    | 0.31566     |  |
| DVU2858     | 208366 | -1.38034   | -2.35443    |  |
| DVU2857     | 208367 | -0.979384  | -1.06294    |  |
| DVU2859     | 208368 | -1.43722   | -1.86353    |  |
| DVU2860     | 208369 | 0.0463489  | 0.0640188   |  |
| DVU2861     | 208370 | -0.0052573 | -0.00811938 |  |
| DVU2862     | 208371 | -0.987207  | -1.60605    |  |
| DVU2863     | 208372 | -1.83529   | -2.921      |  |
| DVU2864     | 208373 | -0.33824   | -0.592297   |  |
| DVU2865     | 208374 | 0.711872   | 0.934941    |  |
| DVU2866     | 208375 | -1.24566   | -2.07357    |  |
| DVU2867     | 208376 | -1.53654   | -2.72674    |  |
| DVU2868     | 208377 | 0.617383   | 0.893442    |  |
| DVU2869     | 208378 | -1.22199   | -1.81683    |  |
| DVU2870     | 208379 | -1.45835   | -2.23729    |  |
| DVU2871     | 208380 | -1.02987   | -1.7859     |  |
| DVU2872     | 208381 | -0.864998  | 0           |  |
| DVU2873     | 208382 | -0.13468   | 0           |  |
| DVU2874     | 208383 | 1.15726    | 0           |  |
| DVU2875     | 208384 | 1.16954    | 1.24306     |  |
| DVU2876     | 208385 | -0.122695  | -0.225194   |  |
| DVU2877     | 208386 | 0.0515098  | 0.0680475   |  |
| DVU2878     | 208387 | -0.0449967 | 0           |  |
| DVU2879     | 208388 | 1.86134    | 1.46079     |  |
| DVU2880     | 208389 | 0.196658   | 0.252985    |  |
| DVU2881     | 208390 | 1.1093     | 1.32628     |  |
| DVU2882     | 208391 | -0.551821  | -0.944505   |  |
| DVU2883     | 208392 | -0.0863181 | -0.163482   |  |
| DVU2884     | 208393 | -0.780948  | 0           |  |
| DVU2885     | 208394 | -0.15903   | -0.251233   |  |
| DVU2886     | 208395 | -0.781403  | -1.39914    |  |
| DVU2887     | 208396 | -0.241637  | -0.401192   |  |
| DVU2888     | 208397 | -1.16097   | 0           |  |
| DVU2889     | 208398 | -0.67485   | -1.21072    |  |
| DVU2890     | 208399 | -0.361813  | 0           |  |
| DVU2891     | 208400 | -0.733471  | -1.12364    |  |
| DVU2892     | 208401 | -0.840591  | 0           |  |
| DVU2893     | 208402 | 0.530962   | 0.983346    |  |
| DVU2894     | 208403 | -0.0226674 | 0           |  |
| DVU2895     | 208404 | 0.344251   | 0.593199    |  |
| DVU2896     | 208405 | -0.178744  | -0.330282   |  |
| DVU2897     | 208406 | 0.868996   | 1.63991     |  |
| DVU2898     | 208407 | 0.436184   | 0.790278    |  |
| DVU2899     | 208408 | -0.208983  | -0.372319   |  |
| DVU2900     | 208409 | -0.924194  | 0           |  |
| DVU2901     | 208411 | -0.877852  | -1.32628    |  |
| DVU2902     | 208412 | -0.298391  | 0           |  |
| DVU2903     | 208413 | -0.673374  | -1.18199    |  |
| DVU2905     | 208415 | -0.0812094 | -0.120017   |  |
| DVU2906     | 208416 | 0.0451101  | 0.0666827   |  |
| DVU2907     | 208417 | 1.37741    | 1.8795      |  |
| DVU2908     | 208418 | -0.804851  | -1.38438    |  |
| DVU2909     | 208419 | 0.0854061  | 0.131519    |  |

|             |        |             |             |
|-------------|--------|-------------|-------------|
| DVU2910     | 208420 | -1.05877    | -1.77592    |
| DVU2911     | 208421 | 0.190838    | 0.335253    |
| DVU2913     | 208423 | -1.45325    | -2.72646    |
| DVU2914     | 208424 | -0.77736    | 0           |
| DVU2915     | 208425 | 1.07322     | 0           |
| DVU2916     | 208426 | -1.28229    | 0           |
| DVU2917     | 208427 | -0.71045    | -1.16708    |
| DVU2918     | 208428 | 0.596523    | 0.84115     |
| VIMSS208429 | 208429 | 1.00827     | 1.83565     |
| DVU2920     | 208430 | -1.8945     | 0           |
| DVU2921     | 208431 | -0.816086   | -1.38165    |
| DVU2922     | 208432 | -1.85746    | -2.63372    |
| DVU2923     | 208433 | -2.15727    | -3.41659    |
| DVU2924     | 208434 | -1.31598    | -1.82411    |
| DVU2925     | 208435 | -1.35116    | -2.23855    |
| DVU2927     | 208437 | -2.06633    | -3.28917    |
| DVU2928     | 208438 | 0.0780073   | 0           |
| DVU2929     | 208439 | -0.400823   | -0.7665     |
| DVU2931     | 208441 | -0.214611   | -0.385677   |
| DVU2932     | 208442 | 0.277813    | 0.469554    |
| DVU2933     | 208443 | -0.324591   | -0.571969   |
| DVU2934     | 208444 | -0.0379104  | 0           |
| DVU2935     | 208445 | 0.641225    | 0           |
| VIMSS208446 | 208446 | 0.482359    | 0.738501    |
| DVU2937     | 208447 | 0.705303    | 1.28899     |
| DVU2938     | 208448 | 0.85896     | 0           |
| DVU2939     | 208449 | -0.0207231  | -0.0355886  |
| DVU2940     | 208450 | -0.937312   | -1.61646    |
| DVU2941     | 208451 | -0.542416   | -0.927357   |
| DVU2942     | 208452 | -0.718446   | 0           |
| DVU2943     | 208453 | -0.135395   | -0.22636    |
| DVU2944     | 208454 | -0.777226   | -1.2436     |
| DVU2945     | 208455 | -0.739053   | -1.29055    |
| DVU2946     | 208456 | -0.17731    | -0.343186   |
| DVU2949     | 208459 | 0.329206    | 0.485987    |
| VIMSS208461 | 208461 | 0.950263    | 1.73975     |
| DVU2951     | 208462 | 0.118303    | 0           |
| DVU2952     | 208463 | 0.518231    | 0.860029    |
| DVU2953     | 208464 | 0.000253736 | 0.000355493 |
| DVU2954     | 208465 | 0.00327102  | 0           |
| VIMSS208466 | 208466 | 0.0296761   | 0           |
| DVU2956     | 208467 | 0.474342    | 0.866419    |
| VIMSS208468 | 208468 | 1.28866     | 0           |
| DVU2957     | 208470 | 0.297615    | 0.274423    |
| DVU2958     | 208471 | 0.658395    | 0.909662    |
| DVU2959     | 208472 | -0.217074   | -0.326533   |
| DVU2961     | 208474 | 0.709441    | 1.12996     |
| DVU2962     | 208475 | 0.49303     | 0           |
| DVU2963     | 208476 | -0.196177   | -0.325022   |
| DVU2964     | 208477 | 0.745121    | 1.07882     |
| DVU2965     | 208478 | 0.990562    | 1.65436     |
| DVU2966     | 208479 | 0.697796    | 0           |
| DVU2967     | 208480 | -0.270157   | -0.473166   |
| DVU2969     | 208482 | 0.881595    | 1.47158     |
| DVU2970     | 208483 | 0.963287    | 0           |
| DVU2971     | 208484 | -0.0641641  | -0.116447   |
| DVU2973     | 208486 | 1.87932     | 3.68583     |
| DVU2974     | 208487 | 1.10923     | 1.9643      |
| DVU2975     | 208488 | 1.59501     | 2.41286     |
| DVU2976     | 208489 | 0.857648    | 0           |
| VIMSS208490 | 208490 | 1.04786     | 1.89529     |
| DVU2979     | 208492 | -0.706744   | -1.28762    |
| DVU2981     | 208494 | -0.256741   | 0           |
| DVU2982     | 208495 | -0.218564   | -0.3409     |
| DVU2983     | 208496 | -0.570746   | -1.01495    |
| DVU2984     | 208497 | 0.117959    | 0           |
| DVU2985     | 208498 | -0.159962   | -0.305447   |
| DVU2986     | 208499 | 0.580623    | 0           |
| DVU2987     | 208500 | 0.413283    | 0.625323    |
| DVU2988     | 208501 | 0.862826    | 1.46949     |
| DVU2989     | 208502 | 0.0806952   | 0.141773    |
| DVU2990     | 208503 | 0.600604    | 1.11596     |

|             |        |             |            |
|-------------|--------|-------------|------------|
| DVU2991     | 208504 | 0.295623    | 0          |
| DVU2992     | 208505 | 0.146105    | 0.261881   |
| DVU2993     | 208506 | -0.263696   | -0.47893   |
| DVU2995     | 208508 | -0.117179   | -0.216472  |
| DVU2996     | 208509 | -0.276021   | 0          |
| DVU2997     | 208510 | -0.530701   | -0.788561  |
| DVU2999     | 208512 | -0.0475255  | -0.0842833 |
| DVU3001     | 208514 | 0.0952525   | 0.162316   |
| DVU3002     | 208515 | 0.157436    | 0          |
| DVU3003     | 208516 | 0.199658    | 0.368614   |
| DVU3004     | 208517 | 0.0668133   | 0.108789   |
| DVU3005     | 208518 | -0.473539   | -0.871383  |
| DVU3006     | 208519 | -0.718707   | 0          |
| DVU3007     | 208520 | 0.368073    | 0.497277   |
| DVU3008     | 208521 | -0.727445   | -1.30945   |
| DVU3009     | 208522 | 0.158239    | 0.277674   |
| DVU3010     | 208523 | 0.0794073   | 0.122825   |
| DVU3011     | 208524 | -0.720833   | -1.316     |
| DVU3012     | 208525 | 0.386741    | 0.652366   |
| DVU3013     | 208526 | -0.163545   | -0.277993  |
| DVU3014     | 208527 | -0.00698292 | -0.0116652 |
| DVU3015     | 208528 | -0.169253   | -0.285528  |
| DVU3016     | 208529 | -0.508227   | -0.912121  |
| DVU3017     | 208530 | 0.136737    | 0.249248   |
| DVU3018     | 208531 | 0.351495    | 0.661145   |
| DVU3019     | 208532 | 0.240375    | 0.436046   |
| DVU3020     | 208533 | 0.415112    | 0          |
| DVU3021     | 208534 | -0.0716023  | -0.125372  |
| VIMSS208535 | 208535 | -1.08825    | -1.99576   |
| DVU3022     | 208536 | -0.174719   | -0.321984  |
| DVU3023     | 208537 | -0.728068   | -1.13536   |
| DVU3024     | 208538 | -2.29613    | -2.93171   |
| DVU3025     | 208539 | -2.8855     | -3.89265   |
| DVU3026     | 208540 | -0.703238   | -1.06009   |
| DVU3027     | 208541 | -2.74789    | -3.86358   |
| DVU3028     | 208542 | -1.16344    | -2.10364   |
| DVU3030     | 208544 | -2.83577    | -4.48692   |
| DVU3031     | 208545 | -2.588      | -3.66786   |
| DVU3032     | 208546 | -2.76675    | -4.60607   |
| DVU3033     | 208547 | -2.26771    | -3.59327   |
| VIMSS208549 | 208549 | 0.739596    | 1.13537    |
| DVU3035     | 208550 | -0.741201   | -1.32637   |
| DVU3036     | 208551 | 0.713693    | 1.1954     |
| DVU3037     | 208552 | 0.653822    | 1.16521    |
| VIMSS208553 | 208553 | 0.565919    | 0.860514   |
| DVU3039     | 208554 | 0.0676616   | 0.119992   |
| VIMSS208555 | 208555 | 0.260628    | 0.404065   |
| DVU3041     | 208556 | 0.650205    | 1.21206    |
| DVU3042     | 208557 | 0.959546    | 1.76954    |
| VIMSS208559 | 208559 | 0.87108     | 0          |
| DVU3046     | 208561 | -0.312092   | -0.560527  |
| DVU3048     | 208563 | -0.132677   | -0.199514  |
| DVU3049     | 208564 | 0.145007    | 0.274462   |
| DVU3050     | 208565 | -0.414057   | -0.637086  |
| DVU3051     | 208566 | -0.676346   | -1.04472   |
| DVU3052     | 208567 | -0.129028   | 0          |
| DVU3053     | 208568 | -0.838915   | -1.5399    |
| DVU3054     | 208569 | -0.104637   | -0.173007  |
| DVU3055     | 208570 | -0.899387   | -1.16917   |
| DVU3056     | 208571 | -1.19275    | -2.17772   |
| DVU3057     | 208572 | 0.796817    | 1.35636    |
| DVU3058     | 208573 | -0.0141826  | -0.0222497 |
| DVU3059     | 208574 | -0.446427   | -0.792234  |
| VIMSS208575 | 208575 | -0.111566   | -0.194412  |
| DVU3061     | 208576 | -0.336094   | -0.559816  |
| DVU3062     | 208577 | 1.0654      | 1.86389    |
| DVU3063     | 208578 | 0.882303    | 1.13956    |
| DVU3064     | 208579 | 0.087009    | 0.141934   |
| DVU3065     | 208580 | -0.435661   | 0          |
| DVU3066     | 208581 | -0.212564   | 0          |
| DVU3067     | 208582 | 0.950471    | 1.74166    |
| DVU3068     | 208584 | 1.31247     | 2.37432    |

|             |        |            |            |
|-------------|--------|------------|------------|
| DVU3070     | 208586 | -1.71357   | -2.72693   |
| DVU3071     | 208587 | -1.24932   | -2.3391    |
| DVU3072     | 208588 | 0.0667645  | 0.100706   |
| DVU3074     | 208590 | -0.69047   | -1.08222   |
| VIMSS208591 | 208591 | -0.0213919 | -0.0252748 |
| DVU3076     | 208592 | 1.58762    | 2.99734    |
| DVU3077     | 208593 | 1.99107    | 3.74498    |
| VIMSS208594 | 208594 | 0.432346   | 0          |
| DVU3079     | 208595 | 0.722415   | 1.21271    |
| DVU3080     | 208596 | 0.128611   | 0.225891   |
| DVU3081     | 208597 | -0.660003  | -1.20321   |
| DVU3082     | 208598 | -0.331834  | -0.612702  |
| VIMSS208599 | 208599 | 0.0731582  | 0.11222    |
| DVU3084     | 208600 | -0.424529  | -0.792639  |
| DVU3085     | 208601 | 0.213595   | 0.395905   |
| DVU3086     | 208602 | -0.977796  | -1.40219   |
| DVU3087     | 208603 | -0.0233187 | -0.0324707 |
| DVU3088     | 208604 | -0.377626  | -0.674968  |
| DVU3089     | 208605 | -0.435339  | -0.785362  |
| DVU3090     | 208606 | -1.50813   | -2.82808   |
| DVU3091     | 208607 | 0.425163   | 0.770401   |
| VIMSS208608 | 208608 | 0.0466656  | 0.0791409  |
| DVU3092     | 208609 | -0.222937  | -0.349613  |
| DVU3093     | 208610 | 0.849633   | 1.38249    |
| DVU3094     | 208611 | -0.696758  | -1.26196   |
| DVU3095     | 208612 | 0.145935   | 0.228974   |
| VIMSS208613 | 208613 | 0.0407567  | 0.0690628  |
| DVU3097     | 208614 | 0.557349   | 1.07749    |
| DVU3098     | 208615 | 0.545824   | 0.843059   |
| DVU3099     | 208616 | -0.823767  | 0          |
| DVU3100     | 208617 | -0.244893  | -0.431714  |
| DVU3101     | 208618 | -0.743576  | 0          |
| DVU3102     | 208619 | -0.449817  | -0.63352   |
| DVU3103     | 208620 | -1.91874   | 0          |
| DVU3104     | 208621 | -0.854375  | -1.54237   |
| VIMSS208623 | 208623 | 0.676335   | 0.463438   |
| DVU3106     | 208624 | 0.111986   | 0.202467   |
| DVU3107     | 208625 | 0.893026   | 1.50516    |
| DVU3108     | 208626 | -0.140228  | -0.232206  |
| DVU3109     | 208627 | -0.212866  | -0.341336  |
| DVU3110     | 208628 | 0.249606   | 0.343736   |
| DVU3111     | 208629 | -0.115055  | -0.195357  |
| DVU3112     | 208630 | 0.499887   | 0          |
| DVU3113     | 208631 | -0.668016  | -1.29867   |
| VIMSS208633 | 208633 | -0.229519  | -0.304162  |
| DVU3119     | 208637 | -0.390221  | -0.710431  |
| VIMSS208638 | 208638 | 0.25096    | 0          |
| DVU3121     | 208639 | -0.508455  | -0.785976  |
| DVU3122     | 208640 | 1.12476    | 1.13658    |
| DVU3123     | 208641 | 0.0790533  | 0.103438   |
| DVU3125     | 208643 | 0.57447    | 1.12169    |
| VIMSS208644 | 208644 | 0.0817692  | 0.149684   |
| DVU3126     | 208645 | 0.550197   | 0.827115   |
| DVU3127     | 208646 | 0.56478    | 0          |
| DVU3128     | 208647 | 0.234996   | 0.424217   |
| DVU3129     | 208648 | 0.776212   | 0          |
| DVU3130     | 208649 | 0.567834   | 0.652596   |
| DVU3131     | 208650 | 2.16354    | 0          |
| DVU3132     | 208651 | 1.54994    | 2.53637    |
| DVU3133     | 208652 | 3.22439    | 5.30956    |
| DVU3134     | 208653 | 2.38222    | 3.69766    |
| DVU3136     | 208655 | 0.951804   | 1.76957    |
| VIMSS208657 | 208657 | -0.229607  | -0.337847  |
| DVU3140     | 208659 | -0.355174  | -0.649867  |
| DVU3142     | 208661 | 0.891162   | 1.49704    |
| DVU3143     | 208662 | 0.545518   | 0.710254   |
| DVU3144     | 208663 | 1.46205    | 2.15841    |
| DVU3145     | 208664 | 2.01021    | 2.51437    |
| DVU3146     | 208665 | 0.0852757  | 0.151479   |
| DVU3148     | 208667 | 0.408015   | 0.66716    |
| DVU3149     | 208668 | 0.012354   | 0.0223053  |
| DVU3150     | 208669 | -0.443806  | -0.834493  |



|             |        |            |            |
|-------------|--------|------------|------------|
| DVU3151     | 208670 | 0.126681   | 0          |
| DVU3153     | 208672 | 0.452557   | 0          |
| DVU3154     | 208673 | -0.396076  | -0.684215  |
| DVU3155     | 208674 | 0.872818   | 1.53517    |
| DVU3157     | 208676 | -0.0185143 | -0.0328201 |
| DVU3158     | 208677 | 0.0794029  | 0.145643   |
| VIMSS208680 | 208680 | 0.0945032  | 0.154552   |
| DVU3161     | 208681 | -1.47658   | 0          |
| DVU3163     | 208683 | 0.357325   | 0          |
| DVU3164     | 208684 | -0.0729134 | -0.139399  |
| DVU3165     | 208685 | -0.12247   | 0          |
| DVU3166     | 208686 | 0.27627    | 0.405632   |
| DVU3168     | 208688 | -1.38978   | -2.59394   |
| DVU3169     | 208689 | 0.247545   | 0.419723   |
| VIMSS208690 | 208690 | -0.540147  | -0.756807  |
| DVU3170     | 208691 | 0.51844    | 0.696183   |
| DVU3172     | 208693 | 0.202358   | 0.358588   |
| DVU3173     | 208694 | -0.152481  | -0.302804  |
| DVU3174     | 208695 | -1.21117   | -2.34941   |
| DVU3175     | 208696 | 0.120142   | 0          |
| DVU3176     | 208697 | -0.340507  | -0.626728  |
| DVU3177     | 208698 | -0.102958  | -0.19924   |
| DVU3178     | 208699 | -1.11222   | -2.04411   |
| DVU3179     | 208700 | -0.233432  | 0          |
| DVU3180     | 208701 | 0.180641   | 0.321212   |
| DVU3181     | 208702 | -0.526472  | 0          |
| DVU3182     | 208703 | 0.832377   | 1.5501     |
| DVU3184     | 208705 | -0.0861705 | -0.155073  |
| DVU3186     | 208707 | -0.825961  | -1.49795   |
| DVU3187     | 208708 | 0.617363   | 0          |
| DVU3188     | 208709 | -0.0375485 | -0.0547536 |
| DVU3189     | 208710 | 0.163869   | 0          |
| DVU3190     | 208711 | -0.921218  | -1.61682   |
| DVU3191     | 208712 | -0.598184  | 0          |
| DVU3192     | 208713 | -0.784373  | -1.41978   |
| DVU3193     | 208714 | -0.253388  | 0          |
| DVU3194     | 208715 | -0.869789  | -1.3077    |
| DVU3195     | 208716 | 0.190885   | 0.316885   |
| DVU3196     | 208717 | 0.332904   | 0.566868   |
| DVU3198     | 208719 | -0.869515  | -1.53128   |
| DVU3199     | 208720 | -1.10704   | -1.78451   |
| DVU3200     | 208721 | -1.13943   | -2.11898   |
| DVU3201     | 208722 | -0.0819427 | 0          |
| DVU3202     | 208723 | -0.587681  | -0.923848  |
| DVU3203     | 208724 | -0.331935  | -0.627643  |
| DVU3204     | 208725 | -0.75514   | -1.37074   |
| DVU3205     | 208726 | -0.0951306 | -0.161166  |
| DVU3206     | 208728 | -1.0109    | -1.87986   |
| DVU3207     | 208729 | 0.178062   | 0.32952    |
| DVU3208     | 208730 | -0.577995  | -1.07759   |
| VIMSS208731 | 208731 | 0.590137   | 0          |
| DVU3210     | 208732 | -0.681442  | -1.19229   |
| VIMSS208733 | 208733 | 1.25575    | 1.42165    |
| DVU3212     | 208734 | -2.00542   | 0          |
| DVU3213     | 208735 | 0.512503   | 0.910902   |
| DVU3214     | 208736 | 0.541434   | 0.893882   |
| DVU3215     | 208737 | 0.433558   | 0.830524   |
| DVU3216     | 208738 | 0.4053     | 0.778224   |
| DVU3217     | 208739 | 1.00727    | 1.96106    |
| DVU3218     | 208740 | 0.46834    | 0.910205   |
| DVU3219     | 208741 | 0.545273   | 1.05451    |
| DVU3220     | 208742 | 0.0323151  | 0.0578733  |
| DVU3221     | 208743 | -0.148143  | -0.285545  |
| DVU3222     | 208744 | 0.492343   | 0.931786   |
| DVU3223     | 208745 | 0.0175794  | 0.0277867  |
| DVU3224     | 208746 | -0.406306  | -0.614201  |
| DVU3225     | 208747 | 0.260994   | 0.477274   |
| DVU3226     | 208748 | -0.258017  | -0.475377  |
| DVU3228     | 208750 | 0.652768   | 1.1294     |
| DVU3230     | 208752 | 0.372888   | 0          |
| DVU3232     | 208754 | -0.560483  | 0          |
| DVU3233     | 208755 | -0.360606  | -0.616253  |

|             |        |            |            |
|-------------|--------|------------|------------|
| DVU3234     | 208757 | -0.291801  | -0.485722  |
| DVU3236     | 208759 | -0.498024  | -0.724461  |
| DVU3238     | 208761 | -0.312406  | -0.55425   |
| DVU3239     | 208762 | -1.1955    | 0          |
| DVU3240     | 208763 | 0.275122   | 0.463828   |
| DVU3241     | 208764 | -0.115704  | -0.164164  |
| DVU3242     | 208765 | -0.665483  | -1.23579   |
| DVU3243     | 208766 | -0.647371  | -0.987014  |
| VIMSS208767 | 208767 | -0.0530653 | -0.0952936 |
| DVU3245     | 208768 | -0.699579  | 0          |
| DVU3246     | 208769 | 0.984864   | 1.82296    |
| DVU3247     | 208771 | 0.698187   | 1.17886    |
| DVU3248     | 208772 | 0.819539   | 1.32243    |
| DVU3249     | 208773 | 0.493065   | 0.809724   |
| DVU3250     | 208774 | -0.0271732 | -0.0499566 |
| DVU3251     | 208775 | 1.06872    | 1.6171     |
| DVU3252     | 208776 | 0.0817759  | 0.144924   |
| DVU3253     | 208777 | -0.365838  | -0.659552  |
| DVU3254     | 208778 | 0.508202   | 0          |
| DVU3255     | 208779 | -0.957822  | -1.57269   |
| DVU3256     | 208780 | -0.0722666 | -0.12012   |
| DVU3258     | 208782 | -0.219904  | -0.337693  |
| DVU3259     | 208783 | 0.172055   | 0          |
| DVU3260     | 208784 | 0.975591   | 1.06469    |
| DVU3261     | 208785 | 0.762588   | 1.34848    |
| DVU3262     | 208786 | 0.16893    | 0.303106   |
| DVU3263     | 208787 | 0.79302    | 1.53152    |
| DVU3264     | 208788 | 0.17944    | 0.313956   |
| DVU3266     | 208790 | 0.755581   | 0          |
| DVU3267     | 208791 | -0.236875  | -0.436788  |
| DVU3268     | 208792 | -0.123515  | -0.203103  |
| DVU3269     | 208793 | 0.542975   | 0.924028   |
| DVU3270     | 208794 | 0.0484199  | 0.0725008  |
| DVU3271     | 208795 | -0.0385763 | -0.0700463 |
| DVU3272     | 208796 | -0.657661  | -1.20796   |
| DVU3273     | 208797 | -0.87913   | -1.27983   |
| DVU3274     | 208798 | -1.3517    | -2.48949   |
| DVU3275     | 208799 | -0.803603  | -1.503     |
| DVU3276     | 208800 | -0.766161  | -1.17644   |
| DVU3278     | 208802 | 0.617727   | 1.03826    |
| DVU3279     | 208803 | -0.196254  | -0.349024  |
| VIMSS208804 | 208804 | -0.62255   | -1.04154   |
| DVU3281     | 208806 | -0.734226  | -1.31017   |
| DVU3282     | 208807 | 0.596646   | 1.09267    |
| DVU3283     | 208809 | -0.381326  | -0.690044  |
| DVU3284     | 208810 | 0.526516   | 0.820943   |
| DVU3285     | 208811 | 0.855411   | 1.05214    |
| DVU3287     | 208813 | -1.10011   | 0          |
| VIMSS208814 | 208814 | -0.386303  | -0.378756  |
| VIMSS208815 | 208815 | 0.4318     | 0.576273   |
| DVU3289     | 208816 | -0.194444  | -0.327947  |
| DVU3290     | 208817 | 0.232824   | 0.395918   |
| DVU3291     | 208818 | 0.439418   | 0.701513   |
| DVU3292     | 208819 | -0.246135  | -0.402757  |
| DVU3293     | 208820 | 0.352952   | 0.632377   |
| DVU3294     | 208821 | -0.0757274 | -0.125934  |
| DVU3295     | 208822 | 1.06815    | 1.64905    |
| DVU3296     | 208823 | 0.707784   | 1.28932    |
| DVU3297     | 208824 | -1.32049   | -2.09216   |
| DVU3298     | 208825 | -0.129101  | -0.214335  |
| DVU3299     | 208826 | -0.117719  | -0.209273  |
| DVU3300     | 208827 | 0.741528   | 0          |
| DVU3301     | 208828 | 0.825025   | 1.18663    |
| DVU3303     | 208830 | 0.715895   | 1.04236    |
| VIMSS208831 | 208831 | 0.583091   | 0          |
| DVU3305     | 208832 | -0.0794543 | -0.124067  |
| DVU3306     | 208833 | -0.109854  | 0          |
| DVU3307     | 208834 | -1.89223   | -3.32283   |
| DVU3308     | 208835 | -1.49081   | 0          |
| DVU3310     | 208836 | -2.13374   | -3.28062   |
| DVU3311     | 208837 | -0.374578  | 0          |
| DVU3312     | 208838 | 0.610735   | 0.802134   |

|             |        |            |            |
|-------------|--------|------------|------------|
| DVU3313     | 208839 | -0.199525  | -0.301515  |
| DVU3314     | 208840 | 0.68627    | 0.943796   |
| DVU3315     | 208841 | -0.426407  | 0          |
| DVU3316     | 208842 | -0.34392   | -0.61092   |
| VIMSS208843 | 208843 | -0.0359796 | -0.054309  |
| DVU3318     | 208844 | -0.154583  | -0.248377  |
| DVU3319     | 208845 | 0.552677   | 0          |
| DVU3320     | 208846 | -0.328771  | -0.551717  |
| DVU3322     | 208848 | 0.0732009  | 0.115508   |
| DVU3323     | 208849 | -0.0848674 | 0          |
| DVU3324     | 208850 | -0.091296  | -0.0966905 |
| DVU3325     | 208851 | -0.277114  | -0.437234  |
| DVU3326     | 208852 | 0.188791   | 0.286951   |
| VIMSS208854 | 208854 | -0.974553  | -1.69404   |
| DVU3329     | 208855 | 0.203216   | 0.342448   |
| DVU3330     | 208856 | -0.236181  | -0.427857  |
| DVU3331     | 208857 | 0.359917   | 0.561168   |
| DVU3332     | 208858 | 0.0148882  | 0.0246881  |
| DVU3334     | 208860 | -0.165238  | -0.269409  |
| DVU3335     | 208861 | -0.117822  | -0.224275  |
| DVU3336     | 208862 | 0.314755   | 0.506687   |
| DVU3337     | 208863 | 0.0373518  | 0          |
| DVU3338     | 208864 | 0.578059   | 0.902816   |
| VIMSS208866 | 208866 | 1.10033    | 1.55033    |
| VIMSS208867 | 208867 | -0.0394229 | -0.0634971 |
| DVU3342     | 208868 | 0.521649   | 0.952414   |
| DVU3343     | 208869 | 0.186182   | 0          |
| DVU3344     | 208870 | 0.949828   | 1.41378    |
| VIMSS208873 | 208873 | 1.372      | 1.72184    |
| DVU3347     | 208874 | -1.47446   | -2.58546   |
| DVU3348     | 208875 | -1.4997    | -2.42434   |
| DVU3349     | 208876 | -1.16687   | 0          |
| DVU3350     | 208877 | -0.994366  | -1.88548   |
| DVU3351     | 208878 | -0.24241   | -0.456881  |
| DVU3352     | 208879 | 0.646868   | 1.19603    |
| DVU3355     | 208882 | 1.61875    | 0          |
| DVU3356     | 208883 | -0.0860061 | -0.155674  |
| DVU3357     | 208884 | -0.415003  | 0          |
| DVU3359     | 208886 | 0.398852   | 0.719204   |
| DVU3360     | 208887 | 0.23578    | 0.426657   |
| DVU3361     | 208888 | -0.403606  | -0.652084  |
| DVU3363     | 208890 | 0.0912994  | 0.16998    |
| DVU3364     | 208891 | 0.78587    | 1.49086    |
| DVU3365     | 208892 | -0.173159  | 0          |
| DVU3366     | 208893 | -0.463841  | -0.79132   |
| DVU3367     | 208894 | -1.68314   | -2.59933   |
| DVU3368     | 208895 | -1.03305   | -1.72053   |
| DVU3369     | 208896 | 0.267892   | 0          |
| VIMSS208897 | 208897 | 0.797849   | 1.2515     |
| DVU3371     | 208898 | 0.387034   | 0.620556   |
| DVU3372     | 208899 | 0.680711   | 0.915868   |
| DVU3373     | 208900 | -0.531129  | -0.879936  |
| DVU3374     | 208901 | 0.197068   | 0.342571   |
| DVU3376     | 208904 | 0.475134   | 0.753138   |
| DVU3380     | 208908 | 0.583345   | 0.599904   |
| DVU3381     | 208909 | 0.448343   | 0.789066   |
| DVU3382     | 208910 | 0.336157   | 0.544711   |
| VIMSS208911 | 208911 | 0.731296   | 0.53397    |
| DVU3384     | 208912 | 0.649218   | 1.07651    |
| VIMSS208913 | 208913 | -0.0107123 | -0.0157469 |
| DVU3386     | 208914 | -0.46256   | -0.757466  |
| DVU3387     | 208915 | 0.868308   | 1.38582    |
| DVU3388     | 208916 | 0.264581   | 0.464659   |
| DVU3389     | 208917 | -0.773141  | -1.415     |
| VIMSS208918 | 208918 | -0.0318804 | -0.0541832 |
| VIMSS208919 | 208919 | -0.232713  | -0.269555  |
| VIMSS208920 | 208920 | -0.626492  | -1.10281   |
| DVU3392     | 208921 | 0.808232   | 1.37028    |
| DVU3393     | 208922 | 0.137271   | 0.232621   |
| DVU3394     | 208923 | 0.626465   | 0.697216   |
| DVU3395     | 208924 | -1.34027   | -2.42724   |
| VIMSS208925 | 208925 | -0.240774  | -0.433156  |

|             |        |                  |            |
|-------------|--------|------------------|------------|
| DVU0001     | 208926 | -0.51345         | -0.927761  |
| VIMSS208927 | 208927 | -0.613687        | -1.08301   |
| DVU0002     | 208928 | -0.312468        | -0.520794  |
| DVU0003     | 208929 | -0.212177        | -0.403086  |
| VIMSS208930 | 208930 | -0.387327        | -0.662839  |
| DVU0004     | 208931 | -0.989554        | -1.66678   |
| DVU0005     | 208932 | -0.273117        | -0.434694  |
| DVU0006     | 208933 | 1.19033 2.13413  |            |
| DVU0007     | 208934 | -0.0527053       | -0.0912681 |
| DVU0008     | 208935 | 1.10977 1.30263  |            |
| DVU0009     | 208936 | -1.07897         | -1.80255   |
| DVU0010     | 208937 | -0.158517        | -0.21147   |
| DVU0011     | 208938 | 0.219552         | 0.399895   |
| DVU0012     | 208939 | -0.32015         | -0.601011  |
| DVU0013     | 208940 | -0.18339         | -0.296512  |
| DVU0014     | 208941 | -2.5462 -3.92437 |            |
| DVU0015     | 208942 | 0.0435523        | 0.0737281  |
| DVU0016     | 208943 | 0.821415         | 0.996288   |
| VIMSS208944 | 208944 | -0.0371095       | -0.0539102 |
| DVU0018     | 208945 | 0.4619 0.800706  |            |
| DVU0019     | 208946 | 2.18509 3.40518  |            |
| VIMSS208947 | 208947 | 0.946721         | 1.0278     |
| DVU0020     | 208948 | -0.131974        | -0.21709   |
| DVU0021     | 208949 | -0.134176        | -0.251336  |
| DVU0022     | 208950 | 0.313246         | 0.452765   |
| VIMSS208951 | 208951 | 0.193509         | 0.287068   |
| DVU0024     | 208952 | -1.39948         | -1.94721   |
| DVU0025     | 208953 | 0.0104439        | 0.0173963  |
| DVU0026     | 208954 | -0.60746         | -1.08744   |
| DVU0027     | 208955 | -0.459246        | -0.860686  |
| DVU0028     | 208956 | 0.682906         | 1.28453    |
| DVU0029     | 208957 | -0.103442        | -0.180839  |
| DVU0031     | 208959 | 0.212187         | 0.346272   |
| DVU0032     | 208960 | 0.55745 0.996912 |            |
| DVU0033     | 208961 | 0.0471218        | 0.0914735  |
| DVU0034     | 208962 | -0.331759        | -0.620961  |
| DVU0035     | 208963 | -0.385012        | -0.633898  |
| DVU0036     | 208964 | -1.72318         | -2.57487   |
| DVU0037     | 208965 | 0.246506         | 0.448289   |
| DVU0038     | 208966 | -0.393518        | -0.647294  |
| DVU0039     | 208967 | -0.161813        | -0.20476   |
| DVU0040     | 208968 | -0.839336        | -1.36971   |
| DVU0041     | 208969 | -0.929814        | -1.53097   |
| DVU0042     | 208970 | 0.0709214        | 0.123341   |
| DVU0043     | 208971 | 0.93782 1.68252  |            |
| DVU0044     | 208972 | 0.340916         | 0.581743   |
| DVU0045     | 208973 | 0.0813687        | 0.153265   |
| DVU0046     | 208974 | 0.200221         | 0.3854     |
| DVU0047     | 208975 | -0.297478        | -0.519401  |
| DVU0048     | 208976 | 0.016429         | 0.0290253  |
| DVU0049     | 208977 | 0.282671         | 0.531384   |
| DVU0050     | 208978 | 0.116975         | 0.196526   |
| DVU0051     | 208979 | 0.278506         | 0.478965   |
| DVU0052     | 208980 | -0.143544        | -0.249052  |
| DVU0053     | 208981 | 0.861114         | 1.52363    |
| DVU0054     | 208982 | -0.658922        | -1.07726   |
| DVU0055     | 208983 | -0.258811        | -0.393597  |
| DVU0056     | 208984 | 0.0943128        | 0.169425   |
| DVU0057     | 208985 | 0.0201004        | 0.0366993  |
| DVU0058     | 208986 | 0.270125         | 0.48023    |
| DVU0059     | 208987 | -0.349575        | -0.585805  |
| DVU0060     | 208988 | -0.178976        | -0.310081  |
| DVU0061     | 208989 | -0.881766        | -1.60934   |
| DVU0062     | 208990 | -0.343531        | -0.653934  |
| DVU0063     | 208991 | -0.241409        | -0.460314  |
| DVU0064     | 208992 | -1.40954         | -2.30833   |
| DVU0065     | 208993 | -0.146933        | -0.222908  |
| DVU0066     | 208994 | -0.241505        | -0.428748  |
| DVU0067     | 208995 | -0.073772        | -0.134909  |
| DVU0068     | 208996 | 0.451334         | 0.797797   |
| DVU0069     | 208997 | 0.302633         | 0.512515   |
| DVU0070     | 208998 | 0.257754         | 0.279179   |

|             |        |                 |            |
|-------------|--------|-----------------|------------|
| DVU0071     | 208999 | -0.278241       | -0.439217  |
| DVU0072     | 209000 | -0.334871       | -0.584842  |
| DVU0073     | 209001 | -0.0522444      | -0.0987465 |
| DVU0074     | 209002 | -0.458945       | -0.885264  |
| DVU0075     | 209003 | -0.0980985      | -0.169076  |
| DVU0076     | 209004 | -0.235638       | -0.445313  |
| DVU0077     | 209005 | 0.433975        | 0.767705   |
| DVU0078     | 209006 | 0.73033 1.17701 |            |
| DVU0079     | 209007 | 0.253926        | 0.452939   |
| DVU0080     | 209008 | -0.0293651      | -0.0524351 |
| DVU0081     | 209009 | 0.90401 1.50146 |            |
| DVU0082     | 209010 | 0.229788        | 0.375308   |
| DVU0083     | 209011 | 0.395269        | 0.733113   |
| DVU0084     | 209012 | -0.30633        | -0.503355  |
| DVU0085     | 209013 | -1.13846        | -2.04397   |
| VIMSS209014 | 209014 | 1.19702 1.50197 |            |
| DVU0087     | 209016 | -0.396615       | -0.725929  |
| DVU0088     | 209017 | -0.545421       | -0.752465  |
| DVU0089     | 209018 | 0.344946        | 0.520941   |
| DVU0090     | 209019 | -0.118258       | -0.20085   |
| DVU0091     | 209020 | -0.0437735      | -0.0822636 |
| DVU0092     | 209021 | 0.105345        | 0.195143   |
| DVU0093     | 209022 | -0.467288       | -0.752911  |
| DVU0094     | 209023 | -1.16961        | -2.02042   |
| DVU0095     | 209024 | -0.720084       | -1.2804    |
| DVU0096     | 209025 | -1.07007        | -1.4294    |
| DVU0097     | 209026 | -1.36927        | -2.51943   |
| DVU0098     | 209027 | -0.36172        | -0.640183  |
| DVU0099     | 209028 | -0.288064       | -0.507035  |
| DVU0100     | 209029 | -0.154307       | -0.16446   |
| DVU0101     | 209030 | -0.504223       | -0.76296   |
| DVU0102     | 209031 | -0.352487       | -0.403198  |
| DVU0103     | 209032 | -0.860873       | -1.1167    |
| DVU0104     | 209033 | -0.24498        | -0.376807  |
| DVU0105     | 209035 | -0.39305        | -0.697995  |
| DVU0106     | 209036 | -0.323662       | -0.618412  |
| DVU0107     | 209037 | -0.273636       | -0.527938  |
| DVU0108     | 209038 | 0.230014        | 0.372137   |
| DVU0109     | 209039 | 0.66109 1.07275 |            |
| DVU0110     | 209040 | -0.428567       | -0.748014  |
| DVU0112     | 209042 | -0.421489       | -0.781801  |
| DVU0113     | 209043 | -1.54461        | -2.71771   |
| DVU0114     | 209044 | -1.46626        | -2.59528   |
| DVU0115     | 209045 | -0.150052       | -0.233442  |
| DVU0116     | 209046 | -0.752415       | -1.23008   |
| DVU0117     | 209047 | -1.21172        | -1.67393   |
| DVU0118     | 209048 | 0.552734        | 1.03008    |
| DVU0119     | 209049 | -0.216601       | -0.374463  |
| DVU0120     | 209050 | -0.329666       | -0.580135  |
| DVU0121     | 209051 | -0.0943912      | -0.175212  |
| DVU0122     | 209052 | 1.62554 2.84946 |            |
| DVU0123     | 209053 | 0.2338 0.347711 |            |
| DVU0124     | 209054 | -0.245465       | -0.400641  |
| DVU0125     | 209055 | 0.506043        | 0.881245   |
| DVU0126     | 209056 | 0.0369379       | 0.0518633  |
| DVU0127     | 209057 | -0.366134       | -0.681412  |
| DVU0128     | 209058 | 0.147095        | 0.26516    |
| DVU0129     | 209059 | -0.149483       | -0.277056  |
| DVU0130     | 209060 | 0.165474        | 0.274309   |
| VIMSS209062 | 209062 | -1.02154        | -1.41035   |
| DVU0132     | 209063 | -1.95486        | -3.35016   |
| VIMSS209064 | 209064 | -1.16313        | -1.72927   |
| DVU0133     | 209065 | -1.93243        | -3.40118   |
| DVU0134     | 209066 | -0.449262       | -0.795532  |
| DVU0136     | 209067 | -1.26486        | -2.19478   |
| DVU0135     | 209068 | -0.538713       | -1.04358   |
| VIMSS209069 | 209069 | 0.990369        | 1.46075    |
| DVU0138     | 209070 | 1.57333 3.02588 |            |
| DVU0139     | 209071 | 0.0999821       | 0.177866   |
| DVU0140     | 209072 | 0.497444        | 0.899598   |
| DVU0141     | 209073 | -0.695188       | -1.31178   |
| DVU0142     | 209074 | -0.709346       | -1.23269   |

|             |        |            |            |
|-------------|--------|------------|------------|
| DVU0143     | 209075 | -0.794931  | -1.38842   |
| DVU0144     | 209076 | -0.333312  | -0.614676  |
| DVU0145     | 209077 | 0.259896   | 0.473576   |
| DVU0146     | 209078 | -0.0277826 | -0.0479559 |
| DVU0147     | 209079 | 0.0772874  | 0.139397   |
| DVU0148     | 209080 | 0.250878   | 0.46437    |
| DVU0149     | 209081 | 0.591388   | 1.12113    |
| DVU0150     | 209082 | -0.33951   | -0.545288  |
| DVU0152     | 209084 | 0.637771   | 1.1927     |
| DVU0153     | 209085 | -0.146118  | -0.26928   |
| VIMSS209086 | 209086 | -0.813414  | -1.03507   |
| DVU0155     | 209087 | 0.36128    | 0.600444   |
| DVU0156     | 209088 | -0.0570041 | -0.1095    |
| DVU0157     | 209089 | -0.480641  | -0.927727  |
| DVU0158     | 209090 | -0.26454   | -0.473245  |
| DVU0159     | 209091 | -0.507538  | -0.908519  |
| DVU0160     | 209092 | -0.388267  | -0.733778  |
| DVU0161     | 209093 | -0.846374  | -1.41046   |
| DVU0162     | 209094 | -0.901497  | -1.61817   |
| DVU0163     | 209096 | 0.337111   | 0.562665   |
| DVU0164     | 209097 | 0.632407   | 1.17515    |
| DVU0165     | 209098 | -1.76085   | -2.92052   |
| DVU0166     | 209099 | -1.16745   | -2.12226   |
| DVU0167     | 209100 | -1.01426   | -1.69399   |
| DVU0168     | 209101 | -0.988825  | -1.82296   |
| DVU0169     | 209102 | -0.0707804 | -0.0950586 |
| DVU0170     | 209103 | 2.42638    | 4.38486    |
| DVU0172     | 209105 | 2.21812    | 4.24333    |
| DVU0173     | 209106 | 1.49846    | 0          |
| DVU0174     | 209107 | 1.2096     | 2.15278    |
| DVU0175     | 209108 | -0.206331  | 0          |
| DVU0176     | 209109 | -0.15347   | -0.286858  |
| DVU0177     | 209110 | 0.144592   | 0.2466     |
| VIMSS209111 | 209111 | -0.410879  | -0.652011  |
| DVU0179     | 209112 | -0.16845   | -0.327951  |
| DVU0180     | 209113 | -0.264038  | -0.410671  |
| DVU0181     | 209114 | 0.32168    | 0.46931    |
| DVU0182     | 209115 | -0.0861832 | -0.155623  |
| DVU0183     | 209116 | -0.296012  | -0.472113  |
| DVU0184     | 209117 | 0.18811    | 0.302196   |
| DVU0185     | 209118 | 0.133495   | 0.183251   |
| DVU0186     | 209119 | 1.62096    | 2.17233    |
| DVU0187     | 209120 | -1.00392   | -1.76253   |
| VIMSS209121 | 209121 | -0.336036  | -0.579214  |
| DVU0189     | 209122 | -1.2403    | -2.00534   |
| DVU0190     | 209123 | -0.87241   | -1.15828   |
| DVU0191     | 209124 | -0.228601  | -0.350447  |
| DVU0192     | 209125 | -0.624553  | -1.02193   |
| DVU0193     | 209126 | 0.239277   | 0.161829   |
| DVU0194     | 209127 | -0.988932  | -1.60707   |
| DVU0195     | 209128 | -0.137728  | -0.208717  |
| DVU0196     | 209129 | -0.678425  | -1.27386   |
| DVU0197     | 209130 | -0.31647   | -0.537614  |
| DVU0198     | 209131 | -1.21417   | -1.67423   |
| DVU0199     | 209132 | -1.61287   | -2.7132    |
| DVU0200     | 209133 | -1.68102   | -2.93428   |
| DVU0201     | 209134 | -1.14159   | -1.92706   |
| DVU0202     | 209135 | -1.30078   | -2.24459   |
| DVU0203     | 209136 | -1.85294   | -2.98276   |
| DVU0204     | 209137 | -1.22716   | -1.88474   |
| DVU0205     | 209138 | -0.905095  | -1.30508   |
| DVU0206     | 209139 | -0.965022  | -1.53051   |
| DVU0207     | 209140 | -0.828622  | -1.31578   |
| DVU0208     | 209141 | -1.01069   | -1.61795   |
| DVU0209     | 209142 | -1.32368   | -2.13491   |
| DVU0210     | 209143 | -0.956818  | -1.55633   |
| DVU0211     | 209144 | -0.0726252 | -0.116725  |
| DVU0212     | 209145 | -0.307064  | -0.504394  |
| DVU0213     | 209146 | 0.197909   | 0.3096     |
| DVU0214     | 209147 | 0.0320581  | 0.0515216  |
| DVU0215     | 209148 | 0.203849   | 0.346351   |
| DVU0216     | 209149 | -0.880691  | -1.38623   |

|             |        |            |            |
|-------------|--------|------------|------------|
| DVU0217     | 209150 | -1.06223   | -1.86197   |
| DVU0218     | 209151 | -0.346065  | -0.619425  |
| DVU0219     | 209152 | -1.05748   | -1.81312   |
| DVU0220     | 209153 | 0.0857369  | 0.16884    |
| DVU0221     | 209154 | -1.33422   | -2.30998   |
| DVU0222     | 209155 | -0.0990636 | -0.158524  |
| DVU0223     | 209156 | -0.0938567 | 0          |
| DVU0224     | 209157 | 0.245332   | 0.441286   |
| VIMSS209158 | 209158 | 1.95684    | 1.85988    |
| DVU0226     | 209159 | -0.353987  | -0.612912  |
| DVU0227     | 209160 | -0.498222  | -0.939797  |
| VIMSS209161 | 209161 | -0.664158  | -1.03295   |
| DVU0230     | 209163 | 0.0690306  | 0.117504   |
| DVU0231     | 209164 | -0.18344   | -0.294587  |
| DVU0232     | 209165 | -0.600989  | -0.971114  |
| VIMSS209166 | 209166 | 2.31438    | 2.63575    |
| DVU0234     | 209167 | 0.241029   | 0.44611    |
| DVU0235     | 209168 | -0.337077  | -0.612876  |
| DVU0236     | 209169 | -0.913576  | -1.3434    |
| DVU0237     | 209170 | -0.517032  | -0.851379  |
| DVU0238     | 209171 | 1.17765    | 2.20892    |
| VIMSS209172 | 209172 | 1.18043    | 2.06051    |
| DVU0240     | 209173 | 0.813205   | 1.45162    |
| DVU0241     | 209174 | 0.347753   | 0.6494     |
| DVU0242     | 209175 | -0.26309   | -0.499622  |
| DVU0243     | 209176 | -0.381903  | -0.660139  |
| DVU0244     | 209177 | -0.0873867 | -0.165504  |
| DVU0245     | 209178 | -0.156072  | -0.256193  |
| DVU0246     | 209179 | 0.0968803  | 0.164585   |
| DVU0247     | 209180 | 0.145722   | 0.276787   |
| VIMSS209181 | 209181 | -0.495088  | -0.902435  |
| DVU0249     | 209182 | 0.589929   | 0.944845   |
| DVU0250     | 209183 | 1.006      | 1.91366    |
| DVU0252     | 209185 | -0.722023  | -1.35313   |
| DVU0253     | 209186 | 0.458244   | 0.852659   |
| VIMSS209187 | 209187 | 0.150797   | 0.248785   |
| DVU0255     | 209188 | 0.254224   | 0.483751   |
| DVU0256     | 209189 | 0.0953388  | 0.173695   |
| DVU0257     | 209191 | -0.0205682 | -0.0324441 |
| DVU0258     | 209192 | -0.445351  | -0.784139  |
| DVU0259     | 209193 | 0.0731008  | 0.137331   |
| DVU0260     | 209194 | 0.539055   | 0.954063   |
| DVU0261     | 209195 | 0.504562   | 0          |
| DVU0262     | 209196 | 0.0644612  | 0.107618   |
| DVU0263     | 209197 | 0.364027   | 0.632869   |
| DVU0264     | 209198 | -0.0320729 | -0.0599916 |
| DVU0265     | 209199 | 0.524149   | 0.946112   |
| DVU0266     | 209200 | 0.327805   | 0.603876   |
| VIMSS209201 | 209201 | 0.923945   | 1.70832    |
| VIMSS209202 | 209202 | 0.715751   | 1.18033    |
| DVU0269     | 209203 | 0.342377   | 0.659143   |
| DVU0270     | 209204 | -0.148444  | -0.275131  |
| DVU0271     | 209205 | 0.113312   | 0.216514   |
| DVU0272     | 209206 | -0.700559  | -1.20348   |
| DVU0273     | 209207 | 0.348925   | 0.486981   |
| DVU0274     | 209208 | -1.26161   | -2.11044   |
| DVU0275     | 209209 | 0.786639   | 1.49594    |
| DVU0276     | 209210 | 1.57992    | 2.90511    |
| DVU0277     | 209211 | 0.586738   | 1.06554    |
| DVU0278     | 209212 | 0.404406   | 0.620315   |
| DVU0279     | 209213 | -1.45391   | -2.77324   |
| DVU0280     | 209214 | -0.958492  | -1.70551   |
| DVU0281     | 209215 | 0.53306    | 0.975993   |
| DVU0282     | 209216 | -0.69717   | -1.32369   |
| DVU0284     | 209217 | -0.869352  | -1.52505   |
| DVU0283     | 209218 | 0.205047   | 0.25142    |
| DVU0285     | 209219 | -1.11345   | -2.0873    |
| DVU0286     | 209220 | -0.121597  | -0.209316  |
| VIMSS209221 | 209221 | -0.576735  | -0.762783  |
| VIMSS209222 | 209222 | -0.98003   | -1.62925   |
| DVU0289     | 209223 | -0.0385356 | -0.0738151 |
| DVU0290     | 209224 | 0.0478652  | 0.0846586  |

|             |        |              |              |
|-------------|--------|--------------|--------------|
| DVU0291     | 209225 | -0.771174    | -1.33494     |
| DVU0293     | 209226 | -0.538243    | -0.960308    |
| DVU0292     | 209227 | -0.427883    | -0.775806    |
| DVU0294     | 209228 | -0.0100837   | -0.0161411   |
| DVU0295     | 209229 | -0.173713    | -0.316464    |
| DVU0296     | 209230 | -1.16176     | -1.99066     |
| DVU0297     | 209231 | -0.723559    | -1.3844      |
| DVU0298     | 209232 | 0.635154     | 1.0368       |
| DVU0299     | 209233 | -0.796004    | -1.42018     |
| DVU0300     | 209234 | -0.368881    | -0.542445    |
| DVU0302     | 209236 | 0.365531     | 0.642381     |
| DVU0303     | 209237 | 0.513581     | 0.779988     |
| DVU0304     | 209238 | -1.07503     | -1.64496     |
| DVU0305     | 209239 | 0.580717     | 0            |
| DVU0306     | 209240 | 0.411832     | 0.757625     |
| DVU0307     | 209241 | -0.453639    | -0.57726     |
| DVU0308     | 209242 | -0.657693    | -1.24354     |
| DVU0309     | 209243 | -0.796361    | -1.1168      |
| DVU0310     | 209244 | 0.00460754   | 0.00802188   |
| DVU0311     | 209245 | -0.512545    | -0.909215    |
| DVU0312     | 209246 | -0.0531319   | -0.098328    |
| DVU0313     | 209247 | -0.0228267   | -0.0413463   |
| DVU0314     | 209248 | 0.47402      | 0.849104     |
| DVU0315     | 209249 | 0.12851      | 0.19041      |
| DVU0316     | 209250 | 0.613898     | 1.00526      |
| VIMSS209251 | 209251 | -0.685869    | -0.82631     |
| DVU0318     | 209252 | -0.232291    | -0.338398    |
| DVU0319     | 209253 | -0.779393    | -1.40123     |
| DVU0320     | 209254 | 0.463974     | 0.51568      |
| DVU0321     | 209255 | -0.000429841 | -0.000814821 |
| DVU0322     | 209256 | -0.0968673   | -0.160074    |
| DVU0323     | 209257 | -0.693761    | -1.20411     |
| VIMSS209258 | 209258 | 0.0165221    | 0.0321723    |
| DVU0325     | 209259 | -0.106393    | -0.159072    |
| DVU0326     | 209260 | -0.486607    | -0.934172    |
| DVU0327     | 209261 | -0.139295    | -0.250189    |
| DVU0328     | 209262 | -0.258608    | -0.4988      |
| VIMSS209263 | 209263 | -0.300533    | -0.42695     |
| DVU0330     | 209264 | 1.40211      | 2.42998      |
| DVU0331     | 209265 | 0.92089      | 1.62519      |
| VIMSS209266 | 209266 | -0.499617    | -0.864967    |
| DVU0333     | 209267 | -0.155745    | -0.276701    |
| DVU0334     | 209268 | -0.363524    | -0.628722    |
| DVU0335     | 209269 | -1.19196     | -2.05003     |
| DVU0336     | 209270 | -1.09439     | -1.98748     |
| DVU0337     | 209271 | -1.04247     | -1.66433     |
| DVU0339     | 209272 | -0.485554    | -0.92579     |
| DVU0338     | 209273 | -0.744524    | -1.30897     |
| DVU0340     | 209274 | -0.0163094   | -0.0303445   |
| DVU0341     | 209275 | -0.120372    | -0.2094      |
| DVU0342     | 209276 | -0.112122    | -0.212085    |
| DVU0343     | 209277 | -0.733488    | -1.14324     |
| DVU0344     | 209278 | -0.861249    | -1.48663     |
| VIMSS209279 | 209279 | -0.661388    | -0.910084    |
| DVU0346     | 209280 | -1.11709     | 0            |
| DVU0347     | 209281 | -0.544434    | -0.859809    |
| DVU0348     | 209282 | -1.00385     | -1.83907     |
| DVU0349     | 209283 | -0.220674    | -0.336662    |
| DVU0350     | 209284 | -0.744888    | -1.21133     |
| DVU0351     | 209285 | -0.0920629   | -0.147313    |
| DVU0352     | 209286 | -0.508543    | -0.896924    |
| DVU0353     | 209287 | -0.417183    | -0.697554    |
| DVU0354     | 209288 | 1.31304      | 2.48324      |
| DVU0355     | 209289 | 0.992271     | 1.54366      |
| DVU0356     | 209290 | -0.157826    | -0.293903    |
| DVU0357     | 209291 | -0.118297    | -0.214574    |
| DVU0358     | 209292 | -0.379092    | -0.52066     |
| DVU0359     | 209293 | -0.387444    | -0.661979    |
| DVU0360     | 209294 | 0.935814     | 1.43618      |
| DVU0361     | 209295 | 0.263599     | 0.424644     |
| DVU0362     | 209296 | -0.277328    | -0.435696    |
| DVU0363     | 209297 | -1.43603     | -2.74353     |



|             |        |            |            |
|-------------|--------|------------|------------|
| DVU0364     | 209298 | 0.160998   | 0.292513   |
| DVU0365     | 209299 | 0.149217   | 0          |
| DVU0367     | 209301 | 0.420594   | 0.692292   |
| DVU0368     | 209302 | -0.263398  | -0.325131  |
| VIMSS209303 | 209303 | 0.764168   | 0.756437   |
| DVU0369     | 209304 | 2.14659    | 2.39215    |
| DVU0370     | 209305 | -0.286986  | -0.394699  |
| DVU0371     | 209306 | -0.546867  | -0.922983  |
| DVU0372     | 209307 | -1.02556   | -1.10088   |
| DVU0373     | 209308 | 0.301806   | 0.425214   |
| DVU0374     | 209309 | -0.107976  | -0.160633  |
| DVU0375     | 209310 | 0.599743   | 0.906049   |
| DVU0376     | 209311 | 0.0841317  | 0.123036   |
| DVU0377     | 209312 | 0.229091   | 0.351202   |
| DVU0378     | 209313 | -0.0977572 | -0.140432  |
| DVU0379     | 209314 | -0.255727  | -0.46287   |
| DVU0380     | 209315 | 0.450823   | 0.682624   |
| VIMSS209316 | 209316 | 1.16591    | 1.29617    |
| DVU0381     | 209317 | -0.713393  | -0.818586  |
| DVU0382     | 209318 | 2.12363    | 1.82823    |
| DVU0383     | 209319 | 0.585691   | 0.85256    |
| DVU0384     | 209320 | -1.35343   | -2.43023   |
| VIMSS209321 | 209321 | -0.338501  | -0.513736  |
| DVU0386     | 209322 | -0.862443  | -1.30963   |
| DVU0387     | 209323 | 0.0261631  | 0.0405963  |
| DVU0388     | 209324 | -1.56904   | -2.9591    |
| DVU0389     | 209325 | -0.839717  | -1.33897   |
| DVU0390     | 209326 | -1.53716   | -2.94085   |
| DVU0391     | 209327 | 0.467088   | 0.801594   |
| DVU0392     | 209328 | 0.0252018  | 0.0333428  |
| DVU0393     | 209329 | -0.139179  | -0.233583  |
| DVU0394     | 209330 | -0.374487  | -0.679454  |
| DVU0395     | 209331 | -0.376377  | -0.610839  |
| DVU0396     | 209332 | -0.373137  | -0.681934  |
| DVU0397     | 209333 | -0.29047   | -0.481019  |
| DVU0398     | 209334 | -0.582013  | -1.0366    |
| DVU0399     | 209335 | -0.542529  | -0.815008  |
| DVU0400     | 209336 | -0.350807  | -0.530848  |
| DVU0402     | 209338 | -0.170566  | 0          |
| DVU0403     | 209339 | -0.438165  | -0.65587   |
| DVU0404     | 209340 | -1.16937   | -1.91763   |
| DVU0405     | 209341 | 0.00156966 | 0.00256058 |
| DVU0406     | 209342 | 0.00915495 | 0.0150262  |
| DVU0408     | 209344 | 0.718961   | 1.38302    |
| DVU0409     | 209345 | -0.659947  | -0.977177  |
| DVU0410     | 209346 | 0.200801   | 0.322165   |
| DVU0411     | 209347 | 2.71555    | 4.81882    |
| DVU0412     | 209348 | 0.362588   | 0.665327   |
| DVU0413     | 209349 | 0.336218   | 0.607809   |
| DVU0414     | 209350 | -1.23993   | -2.1293    |
| DVU0415     | 209351 | -1.34284   | -2.24242   |
| DVU0416     | 209352 | 0.944875   | 1.562      |
| DVU0417     | 209353 | -0.588185  | -1.05119   |
| DVU0418     | 209354 | 0.378705   | 0.708573   |
| DVU0419     | 209355 | 1.59618    | 0          |
| DVU0420     | 209356 | 1.16428    | 1.90459    |
| DVU0422     | 209358 | 0.681538   | 0          |
| DVU0423     | 209359 | 2.13177    | 3.66407    |
| DVU0424     | 209360 | 0.206835   | 0.348117   |
| DVU0425     | 209361 | -0.236807  | -0.397221  |
| VIMSS209363 | 209363 | 0.647013   | 0.718411   |
| DVU0428     | 209364 | -1.02626   | -1.80952   |
| DVU0429     | 209365 | 1.72875    | 2.72931    |
| DVU0431     | 209367 | 1.53917    | 0          |
| DVU0432     | 209368 | 1.48411    | 2.13676    |
| DVU0434     | 209370 | 1.33527    | 2.23938    |
| VIMSS209371 | 209371 | 0.789703   | 1.02623    |
| DVU0436     | 209372 | 0.715507   | 1.12408    |
| DVU0437     | 209373 | 0.387328   | 0.543562   |
| DVU0438     | 209374 | 0.0499873  | 0.0902998  |
| DVU0439     | 209375 | -0.114871  | -0.202783  |
| DVU0440     | 209376 | -0.198928  | -0.272419  |

|             |        |             |            |
|-------------|--------|-------------|------------|
| DVU0441     | 209377 | 0.396372    | 0.710151   |
| DVU0442     | 209378 | 0.76289     | 1.15849    |
| DVU0443     | 209379 | 2.09126     | 0          |
| DVU0444     | 209380 | 0.625563    | 0.88388    |
| DVU0445     | 209381 | 0.0707844   | 0.111833   |
| DVU0446     | 209382 | 0.306513    | 0.438293   |
| DVU0447     | 209383 | 0.414446    | 0.64984    |
| DVU0448     | 209384 | -0.142097   | -0.27015   |
| DVU0450     | 209386 | -0.382805   | -0.687312  |
| DVU0451     | 209387 | -1.08461    | -1.82269   |
| DVU0452     | 209388 | 0.588666    | 0.972578   |
| DVU0453     | 209389 | 0.14816     | 0.2504     |
| DVU0454     | 209390 | 0.0877179   | 0.150923   |
| DVU0455     | 209391 | 0.580417    | 0.968297   |
| DVU0456     | 209392 | 0.55889     | 1.00513    |
| DVU0457     | 209393 | 0.455194    | 0.666017   |
| DVU0458     | 209394 | -1.36508    | 0          |
| DVU0459     | 209395 | -1.81644    | -3.004     |
| DVU0460     | 209396 | -1.06158    | -1.91563   |
| DVU0461     | 209397 | -1.50017    | -2.81926   |
| DVU0462     | 209398 | -1.43719    | -2.50784   |
| DVU0463     | 209399 | -1.66153    | -3.21627   |
| DVU0464     | 209400 | -0.830087   | -1.44215   |
| DVU0465     | 209401 | -1.76794    | -2.74578   |
| DVU0466     | 209402 | -1.21202    | -2.2643    |
| DVU0467     | 209403 | -0.00835127 | -0.0134625 |
| DVU0468     | 209404 | -1.85642    | -3.03167   |
| DVU0469     | 209405 | -0.933673   | -1.28944   |
| DVU0470     | 209406 | -1.40487    | -2.42947   |
| DVU0471     | 209407 | -2.44395    | -4.16616   |
| VIMSS209408 | 209408 | -0.299429   | -0.503848  |
| VIMSS209409 | 209409 | 0.77679     | 1.21908    |
| DVU0475     | 209411 | -1.15616    | -2.00924   |
| DVU0477     | 209413 | -0.345018   | -0.571086  |
| DVU0478     | 209414 | 0.5212      | 0.772478   |
| DVU0479     | 209415 | 0.995495    | 1.33747    |
| DVU0480     | 209416 | -0.470618   | -0.771646  |
| DVU0481     | 209417 | -0.455063   | -0.878642  |
| DVU0482     | 209418 | 1.3862      | 2.55807    |
| DVU0484     | 209420 | 1.0612      | 1.42058    |
| DVU0485     | 209421 | 0.622569    | 0.999441   |
| DVU0487     | 209423 | -0.725511   | -1.2904    |
| DVU0489     | 209425 | -0.519255   | -0.902359  |
| VIMSS209427 | 209427 | 0.352913    | 0.681041   |
| DVU0491     | 209428 | 0.354089    | 0.61439    |
| DVU0492     | 209429 | 0.302591    | 0.562371   |
| DVU0493     | 209430 | -0.0263588  | -0.0449935 |
| DVU0494     | 209431 | 0.192648    | 0.280218   |
| DVU0495     | 209432 | -0.104879   | -0.18337   |
| DVU0496     | 209433 | 0.460052    | 0          |
| DVU0497     | 209434 | 0.962722    | 0          |
| DVU0498     | 209435 | -0.510486   | -0.856492  |
| DVU0499     | 209436 | 0.332886    | 0.617772   |
| DVU0500     | 209437 | -0.848637   | -1.52189   |
| DVU0501     | 209438 | -1.07109    | -1.95311   |
| DVU0502     | 209439 | -1.4281     | -2.4107    |
| DVU0503     | 209440 | -1.31211    | -1.90581   |
| DVU0504     | 209441 | -1.36541    | -2.56086   |
| DVU0506     | 209443 | -0.883774   | -1.5514    |
| DVU0507     | 209445 | -0.675295   | -0.981676  |
| DVU0508     | 209446 | -0.916087   | -1.4729    |
| VIMSS209447 | 209447 | 0.464332    | 0.715216   |
| DVU0510     | 209448 | -1.08842    | 0          |
| DVU0511     | 209449 | -1.30547    | -2.40297   |
| DVU0512     | 209450 | 0.42054     | 0.782439   |
| DVU0513     | 209451 | 0.253594    | 0.455086   |
| DVU0514     | 209452 | 0.184583    | 0.331719   |
| DVU0515     | 209453 | 0.83182     | 1.54869    |
| DVU0517     | 209455 | 0.718569    | 1.24266    |
| DVU0518     | 209456 | -0.365361   | 0          |
| DVU0519     | 209457 | 0.232891    | 0.337942   |
| DVU0520     | 209458 | -0.0202005  | -0.0307295 |

|             |        |            |            |
|-------------|--------|------------|------------|
| DVU0521     | 209459 | -0.199075  | -0.313363  |
| DVU0522     | 209461 | -0.0495265 | -0.081088  |
| DVU0524     | 209463 | 0.844468   | 0          |
| DVU0526     | 209465 | 0.231647   | 0.364538   |
| DVU0527     | 209466 | 0.380715   | 0.563375   |
| DVU0528     | 209467 | 0.0352572  | 0.0537304  |
| DVU0529     | 209468 | -0.370404  | -0.529162  |
| DVU0530     | 209469 | -0.793938  | -1.15303   |
| DVU0531     | 209470 | -0.186711  | -0.262863  |
| DVU0532     | 209471 | -0.232194  | -0.249933  |
| DVU0533     | 209472 | -1.85823   | -2.86845   |
| DVU0534     | 209473 | -1.26279   | -1.57764   |
| DVU0536     | 209475 | -0.532342  | 0          |
| VIMSS209476 | 209476 | 0.00326592 | 0.00390477 |
| DVU0538     | 209477 | 0.803696   | 1.05109    |
| DVU0539     | 209478 | 0.236767   | 0.387645   |
| DVU0540     | 209479 | 0.0842344  | 0          |
| VIMSS209480 | 209480 | 1.16686    | 1.58232    |
| DVU0542     | 209481 | 0.745923   | 1.1921     |
| DVU0543     | 209482 | 1.18898    | 1.87068    |
| DVU0544     | 209483 | 0.130451   | 0.178702   |
| DVU0545     | 209484 | 0.815477   | 1.21946    |
| VIMSS209485 | 209485 | -0.913718  | 0          |
| DVU0547     | 209486 | 0.184905   | 0.325171   |
| DVU0548     | 209487 | -0.495444  | -0.846311  |
| DVU0549     | 209488 | -0.558793  | -0.932269  |
| DVU0550     | 209489 | -0.153119  | -0.238644  |
| DVU0551     | 209490 | -0.124241  | -0.226752  |
| VIMSS209491 | 209491 | -0.0166543 | 0          |
| VIMSS209492 | 209492 | -0.214877  | -0.345012  |
| VIMSS209493 | 209493 | -0.289722  | -0.343703  |
| VIMSS209494 | 209494 | -0.768749  | 0          |
| DVU0555     | 209496 | -0.98295   | -1.80866   |
| DVU0556     | 209497 | -0.150744  | -0.276205  |
| DVU0557     | 209498 | -0.032757  | -0.0559425 |
| VIMSS209499 | 209499 | -1.3046    | -2.21544   |
| VIMSS209500 | 209500 | -0.82106   | -1.32166   |
| DVU0561     | 209502 | -0.446956  | -0.685344  |
| DVU0562     | 209503 | -0.969718  | -1.74758   |
| DVU0563     | 209504 | -0.28392   | -0.53652   |
| DVU0565     | 209506 | 0.963118   | 1.75258    |
| DVU0566     | 209507 | 1.23833    | 0          |
| DVU0567     | 209508 | 0.0855785  | 0.136251   |
| DVU0568     | 209510 | 0.258519   | 0          |
| DVU0569     | 209511 | -0.302634  | -0.560142  |
| DVU0570     | 209512 | 1.38201    | 0          |
| DVU0571     | 209513 | 0.903606   | 1.70069    |
| DVU0572     | 209514 | 2.0481     | 3.5809     |
| VIMSS209515 | 209515 | 0.161288   | 0.264666   |
| DVU0573     | 209516 | 1.16158    | 2.07033    |
| DVU0575     | 209518 | -0.650938  | 0          |
| DVU0576     | 209519 | 1.58255    | 2.93437    |
| DVU0577     | 209520 | 1.28238    | 0          |
| DVU0579     | 209522 | 1.19477    | 0          |
| DVU0580     | 209523 | 1.12812    | 2.07686    |
| DVU0581     | 209524 | 0.754481   | 1.42449    |
| DVU0582     | 209525 | 0.556567   | 1.03095    |
| DVU0584     | 209527 | 0.729064   | 1.33616    |
| DVU0585     | 209528 | -0.404993  | 0          |
| DVU0586     | 209529 | 3.97089    | 5.73245    |
| DVU0588     | 209532 | 3.43207    | 5.4136     |
| DVU0590     | 209534 | 0.122314   | 0.17616    |
| DVU0591     | 209535 | 1.02696    | 0          |
| DVU0592     | 209536 | 0.591492   | 1.08811    |
| DVU0593     | 209537 | -0.782057  | -1.13578   |
| DVU0594     | 209538 | 0.314096   | 0.571207   |
| DVU0595     | 209539 | 1.19405    | 2.26599    |
| DVU0596     | 209540 | 0.765582   | 1.12263    |
| DVU0597     | 209541 | 0.0730532  | 0.133726   |
| DVU0598     | 209542 | 1.57627    | 2.17082    |
| DVU0599     | 209543 | 1.18394    | 0          |
| DVU0600     | 209544 | 0.299882   | 0.537767   |

|             |        |            |            |
|-------------|--------|------------|------------|
| DVU0601     | 209545 | 0.139132   | 0.23432    |
| DVU0602     | 209546 | 1.00132    | 1.95767    |
| DVU0603     | 209547 | 0.839615   | 1.4662     |
| DVU0605     | 209549 | 1.03909    | 1.07703    |
| DVU0606     | 209550 | -0.705238  | -1.29682   |
| DVU0608     | 209552 | 2.01284    | 3.65673    |
| DVU0611     | 209555 | 0.30738    | 0.480152   |
| DVU0612     | 209556 | 1.13774    | 2.0216     |
| VIMSS209559 | 209559 | 1.49918    | 1.32937    |
| VIMSS209560 | 209560 | 2.73896    | 3.55916    |
| DVU0616     | 209561 | -0.104814  | -0.173313  |
| DVU0617     | 209562 | 0.108064   | 0          |
| VIMSS209563 | 209563 | 0.127929   | 0.226933   |
| DVU0618     | 209564 | 1.18899    | 1.16014    |
| DVU0619     | 209565 | -0.232032  | -0.400026  |
| DVU0620     | 209566 | -0.0278948 | -0.0482156 |
| DVU0621     | 209567 | 0.114522   | 0.137497   |
| DVU0622     | 209568 | 0.543943   | 1.02413    |
| VIMSS209569 | 209569 | 1.76205    | 2.00159    |
| DVU0624     | 209570 | 1.04923    | 1.931      |
| DVU0625     | 209571 | 1.27929    | 0          |
| DVU0626     | 209572 | 0.645078   | 1.1851     |
| DVU0627     | 209573 | 0.226735   | 0.367503   |
| DVU0628     | 209574 | 0.47784    | 0          |
| DVU0629     | 209575 | -0.082272  | -0.137781  |
| DVU0630     | 209576 | 0.0827734  | 0.154755   |
| DVU0631     | 209577 | 0.746493   | 1.35993    |
| DVU0632     | 209578 | -0.28942   | -0.505284  |
| DVU0633     | 209579 | 0.220038   | 0.371633   |
| DVU0634     | 209580 | 0.317176   | 0.554151   |
| DVU0636     | 209582 | 0.370013   | 0.647953   |
| DVU0637     | 209583 | -0.809234  | -1.24433   |
| DVU0638     | 209584 | 0.606948   | 1.08137    |
| DVU0639     | 209585 | 0.209547   | 0.393192   |
| DVU0641     | 209587 | 0.0632433  | 0.114072   |
| DVU0642     | 209588 | -0.590851  | -1.09149   |
| DVU0643     | 209589 | -0.650404  | -1.16045   |
| VIMSS209590 | 209590 | -0.398367  | -0.543791  |
| DVUA0132    | 209592 | 0.302833   | 0          |
| DVUA0131    | 209594 | 0.272918   | 0          |
| DVUA0116    | 209607 | -0.695659  | 0          |
| DVUA0114    | 209609 | 0.0299206  | 0.037318   |
| DVUA0111    | 209612 | -0.173761  | 0          |
| DVUA0097    | 209624 | 0.674167   | 0.991098   |
| DVUA0091    | 209629 | 1.06159    | 1.47907    |
| VIMSS209641 | 209641 | -0.281882  | 0          |
| DVUA0076    | 209643 | -0.241774  | 0          |
| DVUA0075    | 209644 | -0.132409  | 0          |
| VIMSS209645 | 209645 | -0.229471  | -0.415129  |
| DVUA0074    | 209646 | -0.877951  | -1.4817    |
| DVUA0073    | 209647 | -0.195672  | 0          |
| DVUA0070    | 209650 | -1.15392   | -2.07615   |
| DVUA0069    | 209652 | -0.454778  | 0          |
| DVUA0036    | 209686 | -0.62154   | 0          |
| DVUA0030    | 209692 | 1.26103    | 1.31222    |
| DVUA0028    | 209694 | 0.758423   | 0.980795   |
| DVUA0023    | 209700 | 1.17944    | 0          |
| DVUA0020    | 209704 | -0.414745  | -0.673897  |
| DVUA0019    | 209705 | -0.0937866 | -0.117943  |
| VIMSS209707 | 209707 | 0.700069   | 1.10198    |
| DVUA0006    | 209717 | -0.775751  | -1.32884   |
| DVUA0003    | 209719 | 0.242948   | 0          |
| DVUA0147    | 209727 | -0.603576  | 0          |
| DVUA0141    | 209731 | 1.63773    | 0          |
| DVUA0135    | 209737 | -0.565544  | 0          |
| DVU0030     | 408289 | -0.40804   | -0.647354  |
| VIMSS408290 | 408290 | -0.524913  | -0.975925  |
| DVU0251     | 408292 | 2.46154    | 3.69486    |
| DVU0301     | 408293 | -0.853227  | -1.00627   |
| DVU0483     | 408294 | 0.0799931  | 0.141913   |
| DVU0583     | 408297 | 0.916446   | 1.65214    |
| DVU0645     | 408298 | -0.217857  | -0.389302  |

|             |        |           |           |
|-------------|--------|-----------|-----------|
| DVU0673     | 408299 | 0.944001  | 0.796866  |
| DVU0748     | 408300 | 0.310111  | 0.587268  |
| DVU1112     | 408305 | 0.678134  | 1.05054   |
| DVU1127     | 408306 | 0.615477  | 0.935765  |
| DVU1156     | 408309 | 0.28252   | 0.460408  |
| DVU1290     | 408312 | 0.365194  | 0.635504  |
| VIMSS408313 | 408313 | -0.876716 | -1.47464  |
| DVU1477     | 408317 | 0.805618  | 0.834459  |
| DVU1478     | 408318 | 0.46983   | 0         |
| DVU1481     | 408319 | -0.553956 | -1.02514  |
| DVU1485     | 408321 | -0.120573 | -0.200838 |
| DVU1486     | 408322 | 0.606488  | 0.940605  |
| DVU1487     | 408323 | 1.26783   | 1.7196    |
| VIMSS408324 | 408324 | 0.941797  | 1.30223   |
| DVU1493     | 408325 | 0.87548   | 1.24006   |
| DVU1495     | 408326 | 0.848195  | 1.08347   |
| DVU1496     | 408327 | 1.35264   | 0         |
| DVU1497     | 408328 | 0.570477  | 0.781656  |
| DVU1510     | 408329 | 0.142858  | 0.230049  |
| DVU1511     | 408330 | 0.777006  | 1.14571   |
| DVU1519     | 408331 | 0.866408  | 1.28505   |
| DVU1539     | 408333 | -1.68244  | -2.81777  |
| VIMSS408335 | 408335 | 0.910304  | 0.821835  |
| DVU1796     | 408339 | 0.400032  | 0.758969  |
| DVU1918     | 408341 | 0.102033  | 0         |
| DVU1964     | 408342 | 0.496435  | 0.897343  |
| DVU2004     | 408343 | 0.305521  | 0.479479  |
| DVU2072     | 408349 | 0.460814  | 0.744429  |
| DVU2174     | 408352 | -1.29786  | -2.22184  |
| DVU2178     | 408353 | 0.784424  | 1.24051   |
| DVU2179     | 408354 | 0.761368  | 1.40317   |
| VIMSS408357 | 408357 | 1.79125   | 2.87443   |
| DVU2430     | 408358 | 0.146751  | 0.252119  |
| DVU2499     | 408359 | -0.306627 | -0.563673 |
| DVU2627     | 408360 | 0.553093  | 0.948766  |
| DVU2840     | 408361 | -0.116515 | -0.191885 |
| DVU3069     | 408362 | -0.856956 | -1.66591  |
| DVU3227     | 408363 | 0.496486  | 0.882017  |
| DVU3257     | 408365 | -0.24712  | -0.320699 |
| DVUA0071    | 408376 | -0.23538  | 0         |
