# Supplementary material for: Transcriptomic and proteomic analyses of Desulfovibrio vulgaris biofilms: Carbon and energy flow contribute to the distinct biofilm growth state
Source: PubMed Central journal article supplement (PMC3431258; doi:10.1186/1471-2164-13-138), 2012-04-16
Supplement: 1471-2164-13-138-S5.pdf [file 1471-2164-13-138-S5.pdf]

**Additional file 5.** Protein expression ratios between biofilm to batch, planktonic cells; biofilm to reactor, planktonic cells; or reactor, planktonic to batch, planktonic cells.

BIOFILM RESULTS

| DVU     | Gene Name | Description                                                               | Ave Biofilm /Batch | Ave Biofilm /Planktonic | Planktonic /Batch |
|---------|-----------|---------------------------------------------------------------------------|--------------------|-------------------------|-------------------|
| DVU0002 | dnaN      | DNA polymerase III, beta subunit                                          | -0.83 (-0.97)      | -0.53 (-0.75)           | -0.35 (-0.46)     |
| DVU0006 | -         | universal stress protein family                                           | -1.32 (-1.54)      | 0.12 (0.11)             | -1.36 (-1.95)     |
| DVU0019 | ngr       | nigerythrin                                                               | 0.56 (0.63)        | 1.21 (1.55)             | -0.51 (-0.7)      |
| DVU0024 | -         | conserved hypothetical protein                                            | 1.1 (1.25)         | -0.38 (-0.55)           | 1.34 (2.02)       |
| DVU0034 | -         | DSBA-like thioredoxin domain protein                                      | 0.22 (0.24)        | 0.02 (-0.02)            | 0.17 (0.31)       |
| DVU0046 | fliN      | flagellar motor switch protein FliN                                       | 1.69 (1.92)        | 0.99 (1.26)             | 0.73 (1.13)       |
| DVU0052 | era       | GTP-binding protein Era                                                   | -0.29 (-0.35)      | -0.14 (-0.24)           | -0.17 (-0.2)      |
| DVU0056 | cheV-1    | chemotaxis protein CheV                                                   | -0.64 (-0.76)      | -0.38 (-0.56)           | -0.29 (-0.38)     |
| DVU0060 | acrA      | efflux transporter, RND family, MFP subunit                               | -0.47 (-0.56)      | -0.7 (-0.98)            | 0.13 (0.24)       |
| DVU0062 | -         | RND efflux system, outer membrane protein, NodT family                    | 0.2 (0.21)         | 0.69 (0.87)             | -0.42 (-0.56)     |
| DVU0085 | trpB-1    | tryptophan synthase, beta subunit                                         | 0.78 (0.88)        | 0.01 (-0.02)            | 0.7 (1.08)        |
| DVU0095 | potD-1    | polyamine ABC transporter, periplasmic polyamine-binding protein          | 0.25 (0.27)        | 0.13 (0.12)             | 0.11 (0.21)       |
| DVU0107 | glnH      | glutamine ABC transporter, periplasmic glutamine-binding protein          | -1.75 (-2.03)      | 0.18 (0.18)             | -1.81 (-2.62)     |
| DVU0114 | hisG      | ATP phosphoribosyltransferase                                             | -0.56 (-0.67)      | -0.08 (-0.15)           | -0.47 (-0.65)     |
| DVU0133 | -         | hypothetical protein                                                      | 0.75 (0.84)        | 0.29 (0.34)             | 0.44 (0.69)       |
| DVU0136 | -         | hypothetical protein                                                      | -0.32 (-0.39)      | -0.19 (-0.3)            | -0.16 (-0.19)     |
| DVU0138 | -         | response regulator                                                        | 1.32 (1.5)         | 1.53 (1.97)             | -0.07 (-0.06)     |
| DVU0142 | trpS      | tryptophanyl-tRNA synthetase                                              | -0.61 (-0.71)      | -0.01 (-0.07)           | -0.57 (-0.79)     |
| DVU0143 | -         | conserved hypothetical protein                                            | 0.91 (1.03)        | 0.52 (0.64)             | 0.39 (0.62)       |
| DVU0169 | -         | oligopeptide/dipeptide ABC transporter, periplasmic                       | -0.26 (-0.32)      | -0.08 (-0.16)           | -0.18 (-0.22)     |
| DVU0186 | -         | conserved hypothetical protein                                            | -1.27 (-1.48)      | -0.79 (-1.09)           | -0.54 (-0.75)     |
| DVU0227 | -         | conserved hypothetical protein                                            | 0.59 (0.66)        | -0.14 (-0.24)           | 0.66 (1.02)       |
| DVU0237 | serS      | seryl-tRNA synthetase                                                     | -0.7 (-0.83)       | -0.55 (-0.78)           | -0.2 (-0.25)      |
| DVU0240 | -         | hypothetical protein                                                      | 1.01 (1.14)        | 1 (1.27)                | 0.08 (0.16)       |
| DVU0241 | -         | MTH1175-like domain family protein                                        | -0.45 (-0.53)      | -1.03 (-1.42)           | 0.44 (0.69)       |
| DVU0247 | ntrX      | response regulator                                                        | -0.18 (-0.23)      | -0.09 (-0.17)           | -0.11 (-0.11)     |
| DVU0251 | -         | membrane protein, putative                                                | 1.21 (1.37)        | 2.2 (2.85)              | -0.74 (-1.04)     |
| DVU0253 | -         | oxidoreductase, FAD/iron-sulfur cluster-binding domain protein            | -1.63 (-1.9)       | -0.47 (-0.67)           | -1.15 (-1.65)     |
| DVU0259 | divK      | DNA-binding response regulator                                            | 0.35 (0.39)        | 0.29 (0.33)             | 0.07 (0.15)       |
| DVU0261 | -         | universal stress protein family                                           | 0.01 (0)           | 1.23 (1.58)             | -1.04 (-1.49)     |
| DVU0262 | -         | hypothetical protein                                                      | -0.21 (-0.26)      | -0.52 (-0.74)           | 0.22 (0.37)       |
| DVU0264 | tmcB      | Transmembrane complex, ferredoxin, 2 [4Fe-4S]                             | -0.36 (-0.43)      | 0.58 (0.71)             | -0.84 (-1.19)     |
| DVU0266 | -         | hypothetical protein                                                      | -0.2 (-0.25)       | 0.1 (0.08)              | -0.29 (-0.38)     |
| DVU0269 | -         | transcriptional regulator, rrf2 protein, putative                         | 0.27 (0.29)        | -0.26 (-0.4)            | 0.46 (0.74)       |
| DVU0276 | -         | conserved hypothetical protein                                            | -0.05 (-0.08)      | 0.05 (0.02)             | -0.11 (-0.12)     |
| DVU0278 | -         | glyoxalase family protein                                                 | 0.16 (0.17)        | -0.04 (-0.1)            | 0.17 (0.3)        |
| DVU0283 | -         | AhpF family protein/thioredoxin reductase                                 | -0.63 (-0.74)      | 0.2 (0.21)              | -0.78 (-1.09)     |
| DVU0284 | ppiB-1    | peptidyl-prolyl cis-trans isomerase B                                     | 0.89 (1.01)        | 1.13 (1.44)             | -0.13 (-0.14)     |
| DVU0285 | hisH      | imidazole glycerol phosphate synthase, glutamine amidotransferase subunit | 1 (1.14)           | 0.56 (0.69)             | 0.44 (0.69)       |
| DVU0286 | hisF      | imidazoleglycerol phosphate synthase, cyclase subunit                     | 0.1 (0.1)          | 0.08 (0.06)             | 0.01 (0.07)       |
| DVU0296 | -         | peptidase, M24 family                                                     | -0.57 (-0.67)      | -0.34 (-0.5)            | -0.25 (-0.32)     |
| DVU0311 | -         | flagellar assembly protein FliH, putative                                 | 0.44 (0.49)        | 0.15 (0.15)             | 0.26 (0.44)       |
| DVU0318 | -         | TPR domain protein                                                        | -1.43 (-1.66)      | -2.23 (-3)              | 0.54 (0.85)       |
| DVU0319 | -         | NAD-dependent epimerase/dehydratase family protein                        | -1.12 (-1.31)      | 0.2 (0.21)              | -1.24 (-1.78)     |
| DVU0322 | eno       | enolase                                                                   | 0.29 (0.32)        | 0.4 (0.47)              | -0.07 (-0.05)     |

|         |        |                                                                                 |               |               |               |
|---------|--------|---------------------------------------------------------------------------------|---------------|---------------|---------------|
| DVU0323 | folD   | methylenetetrahydrofolate dehydrogenase/methenyltetrahydrofolate cyclohydrolase | -0.51 (-0.61) | 0.53 (0.65)   | -0.95 (-1.35) |
| DVU0325 | hypD   | hydrogenase expression/formation protein HypD                                   | -0.43 (-0.52) | -0.2 (-0.32)  | -0.24 (-0.3)  |
| DVU0339 | serA   | D-isomer specific 2-hydroxyacid dehydrogenase family protein                    | -0.46 (-0.55) | -0.43 (-0.62) | -0.08 (-0.06) |
| DVU0341 | kdsB   | 3-deoxy-D-manno-octulosonate cytidyltransferase                                 | -0.87 (-1.02) | -0.83 (-1.15) | -0.13 (-0.14) |
| DVU0343 | -      | HPCH/HPAI aldolase family protein                                               | -0.83 (-0.98) | -0.25 (-0.38) | -0.58 (-0.8)  |
| DVU0353 | -      | alcohol dehydrogenase, iron-containing                                          | -0.67 (-0.79) | 0.68 (0.85)   | -1.23 (-1.76) |
| DVU0367 | -      | Ser/Thr protein phosphatase family protein                                      | 0.92 (1.04)   | 0.97 (1.24)   | 0 (0.05)      |
| DVU0386 | glnH   | amino acid ABC transporter, periplasmic amino acid-binding protein              | 1.33 (1.51)   | 0.35 (0.41)   | 0.93 (1.42)   |
| DVU0396 | hup-1  | DNA-binding protein HU                                                          | 1.04 (1.18)   | 0.9 (1.15)    | 0.19 (0.33)   |
| DVU0401 | -      | hypothetical protein                                                            | 1 (1.13)      | -0.1 (-0.18)  | 1.01 (1.54)   |
| DVU0402 | dsrA   | dissimilatory sulfite reductase alpha subunit                                   | 0.28 (0.31)   | 0.3 (0.35)    | 0 (0.03)      |
| DVU0403 | dvsB   | dissimilatory sulfite reductase beta subunit                                    | 0.21 (0.22)   | 1.1 (1.41)    | -0.75 (-1.06) |
| DVU0404 | dsrD   | dissimilatory sulfite reductase D                                               | 1.38 (1.57)   | 0.2 (0.21)    | 1.11 (1.68)   |
| DVU0410 | -      | hypothetical protein                                                            | -0.04 (-0.06) | -0.72 (-1.01) | 0.56 (0.88)   |
| DVU0414 | tme    | NADP-dependent malic enzyme-related protein                                     | -0.77 (-0.9)  | 0.22 (0.25)   | -0.93 (-1.32) |
| DVU0415 | pepA   | cytosol aminopeptidase                                                          | -0.04 (-0.07) | -1.55 (-2.1)  | 1.25 (1.89)   |
| DVU0423 | -      | universal stress protein family                                                 | 0.59 (0.67)   | 0.89 (1.13)   | -0.2 (-0.25)  |
| DVU0429 | -      | Ech hydrogenase, subunit EchF, putative                                         | 3.41 (3.9)    | 1.75 (2.26)   | 1.68 (2.53)   |
| DVU0430 | -      | Ech hydrogenase, subunit EchE, putative                                         | 1.42 (1.61)   | 1.66 (2.15)   | -0.09 (-0.09) |
| DVU0448 | gmd    | GDP-mannose 4,6-dehydratase                                                     | -0.33 (-0.39) | 0.01 (-0.02)  | -0.34 (-0.45) |
| DVU0460 | -      | predicted phospho-2-dehydro-3-deoxyheptonate aldolase                           | 0.45 (0.5)    | -0.08 (-0.16) | 0.48 (0.76)   |
| DVU0461 | -      | predicted 3-dehydroquinase synthase                                             | -0.91 (-1.07) | -1.05 (-1.44) | 0.02 (0.08)   |
| DVU0462 | -      | chorismate mutase/prephenate dehydratase                                        | -1.99 (-2.31) | -0.32 (-0.48) | -1.61 (-2.32) |
| DVU0463 | aroA   | 3-phosphoshikimate 1-carboxyvinyltransferase                                    | -1.24 (-1.44) | -0.93 (-1.28) | -0.39 (-0.52) |
| DVU0465 | trpE   | anthranilate synthase, component I                                              | -1.72 (-1.99) | -1.29 (-1.76) | -0.53 (-0.73) |
| DVU0467 | trpD   | anthranilate phosphoribosyltransferase                                          | -1.64 (-1.9)  | -1.52 (-2.06) | -0.26 (-0.34) |
| DVU0470 | trpB-2 | tryptophan synthase, beta subunit                                               | -1.94 (-2.25) | -1.02 (-1.4)  | -0.96 (-1.37) |
| DVU0471 | trpA   | tryptophan synthase, alpha subunit                                              | -1.25 (-1.45) | -0.86 (-1.19) | -0.44 (-0.6)  |
| DVU0477 | icd    | isocitrate dehydrogenase, NADP-dependent                                        | -0.67 (-0.79) | -0.74 (-1.03) | -0.01 (0.02)  |
| DVU0481 | rfaD   | ADP-L-glycero-D-mannoheptose-6-epimerase                                        | 0.24 (0.26)   | 0.21 (0.23)   | 0.02 (0.09)   |
| DVU0487 | purE   | phosphoribosylaminoimidazole carboxylase, catalytic subunit                     | 0.11 (0.11)   | -0.53 (-0.75) | 0.55 (0.87)   |
| DVU0488 | purD   | phosphoribosylamine--glycine ligase                                             | 0.06 (0.05)   | -0.19 (-0.31) | 0.22 (0.38)   |
| DVU0489 | paak-1 | phenylacetate-coenzyme A ligase                                                 | -1.39 (-1.62) | -1.26 (-1.71) | -0.25 (-0.31) |
| DVU0492 | argC   | N-acetyl-gamma-glutamyl-phosphate reductase                                     | 0.76 (0.85)   | 0.44 (0.54)   | 0.28 (0.47)   |
| DVU0494 | -      | aminotransferase, class V                                                       | -3.3 (-3.82)  | -1.82 (-2.46) | -1.56 (-2.24) |
| DVU0501 | -      | conserved hypothetical protein                                                  | -0.41 (-0.49) | -0.3 (-0.45)  | -0.14 (-0.16) |
| DVU0503 | pnp    | polyribonucleotide nucleotidyltransferase                                       | -1.21 (-1.41) | -0.1 (-0.19)  | -1.06 (-1.5)  |
| DVU0504 | rpsO   | ribosomal protein S15                                                           | 0.83 (0.94)   | -0.61 (-0.86) | 1.29 (1.95)   |
| DVU0508 | infB   | translation initiation factor IF-2                                              | -0.58 (-0.68) | -1.26 (-1.72) | 0.51 (0.8)    |
| DVU0510 | nusA   | N utilization substance protein A                                               | -0.4 (-0.47)  | -0.88 (-1.22) | 0.36 (0.58)   |
| DVU0522 | yviF   | conserved hypothetical protein                                                  | 0.56 (0.63)   | 1.12 (1.44)   | -0.44 (-0.6)  |
| DVU0523 | flgM   | negative regulator of flagellin synthesis FlgM                                  | 0.52 (0.58)   | 1.34 (1.72)   | -0.67 (-0.93) |
| DVU0547 | -      | high-affinity branched chain amino acid ABC transporter, periplasmic            | 1.38 (1.57)   | 0.95 (1.21)   | 0.47 (0.74)   |
| DVU0551 | livF   | high-affinity branched-chain amino acid ABC transporter                         | 0.24 (0.26)   | -0.05 (-0.13) | 0.26 (0.44)   |
| DVU0565 | gap-1  | glyceraldehyde 3-phosphate dehydrogenase                                        | 0.78 (0.87)   | 0.81 (1.01)   | 0.02 (0.09)   |
| DVU0566 | -      | GAF domain protein                                                              | 0.76 (0.86)   | 0.7 (0.88)    | 0.1 (0.21)    |
| DVU0587 | fdnG-1 | formate dehydrogenase, alpha subunit, selenocysteine-containing                 | 1.5 (1.71)    | 2.59 (3.38)   | -0.8 (-1.13)  |
| DVU0588 | hybA   | formate dehydrogenase, beta subunit, putative                                   | 1.94 (2.21)   | 2.11 (2.74)   | 0 (0.06)      |
| DVU0601 | b1396  | phenylacetic acid degradation protein Paal                                      | 1.13 (1.28)   | 0.28 (0.33)   | 0.81 (1.24)   |
| DVU0607 | ahcY   | adenosylhomocysteinase                                                          | -2.06 (-2.39) | 0.71 (0.89)   | -2.56 (-3.72) |
| DVU0614 | -      | hypothetical protein                                                            | -0.04 (-0.07) | -0.38 (-0.56) | 0.27 (0.45)   |

|         |        |                                                                    |               |               |               |
|---------|--------|--------------------------------------------------------------------|---------------|---------------|---------------|
| DVU0625 | nrfA   | cytochrome c nitrite reductase, catalytic subunit NrfA, putative   | 0.56 (0.63)   | 0.91 (1.16)   | -0.27 (-0.35) |
| DVU0627 | ptB    | phosphotransbutyrylase                                             | -1.17 (-1.36) | -0.03 (-0.09) | -1.1 (-1.56)  |
| DVU0631 | -      | conserved hypothetical protein                                     | 0.24 (0.26)   | 0.31 (0.36)   | -0.05 (-0.02) |
| DVU0645 | -      | methyl-accepting chemotaxis protein                                | 0.64 (0.72)   | 0.19 (0.21)   | 0.42 (0.67)   |
| DVU0646 | cobI   | precorrin-2 C20-methyltransferase                                  | -0.86 (-1)    | 0.1 (0.08)    | -0.93 (-1.32) |
| DVU0647 | -      | iron compound ABC transporter, periplasmic                         | -0.62 (-0.73) | -0.03 (-0.09) | -0.57 (-0.78) |
| DVU0650 | -      | chelataase, putative                                               | -0.9 (-1.05)  | 0.55 (0.68)   | -1.33 (-1.91) |
| DVU0663 | cysK   | cysteine synthase A                                                | 0.9 (1.02)    | 0.65 (0.81)   | 0.27 (0.45)   |
| DVU0664 | -      | cysteine desulfurase                                               | -1.11 (-1.3)  | -0.47 (-0.68) | -0.65 (-0.91) |
| DVU0665 | -      | nitrogen fixation protein nifU                                     | -0.83 (-0.97) | -0.48 (-0.69) | -0.37 (-0.49) |
| DVU0671 | -      | conserved hypothetical protein                                     | -0.74 (-0.87) | -1.05 (-1.44) | 0.18 (0.32)   |
| DVU0675 | fliY   | amino acid ABC transporter, periplasmic amino acid-binding protein | 0.55 (0.62)   | 0.64 (0.8)    | -0.04 (-0.01) |
| DVU0682 | -      | DNA-binding protein, putative                                      | -0.68 (-0.8)  | -0.57 (-0.8)  | -0.18 (-0.21) |
| DVU0683 | -      | hflC protein, putative                                             | -0.63 (-0.75) | -0.07 (-0.14) | -0.55 (-0.77) |
| DVU0684 | hflK   | hflK protein, putative                                             | -0.36 (-0.44) | 0.33 (0.39)   | -0.64 (-0.9)  |
| DVU0693 | narH   | molybdopterin oxidoreductase, cytochrome c heme-binding            | 0.44 (0.49)   | -0.21 (-0.33) | 0.57 (0.89)   |
| DVU0694 | -      | molybdopterin oxidoreductase, molybdopterin-binding subunit        | 0.13 (0.14)   | 0.16 (0.16)   | -0.02 (0.01)  |
| DVU0701 | glcB   | malate synthase G                                                  | 0 (-0.01)     | 0.25 (0.28)   | -0.22 (-0.28) |
| DVU0707 | dctP   | TRAP dicarboxylate family transporter                              | 0.63 (0.71)   | -0.42 (-0.61) | 0.93 (1.42)   |
| DVU0712 | -      | amino acid ABC transporter, periplasmic-binding protein            | 1.45 (1.65)   | 1 (1.28)      | 0.48 (0.77)   |
| DVU0715 | livG   | branched-chain amino acid ABC transporter, ATP binding protein     | #VALUE!       | #VALUE!       | -0.19 (-0.23) |
| DVU0716 | livF   | branched-chain amino acid ABC transporter, ATP-binding protein     | 0.46 (0.51)   | 0.23 (0.26)   | 0.21 (0.37)   |
| DVU0734 | cysG-1 | uroporphyrinogen III synthase/methyltransferase                    | -0.57 (-0.68) | 0.06 (0.02)   | -0.6 (-0.84)  |
| DVU0752 | -      | amino acid ABC transporter, amino acid-binding protein             | 1.95 (2.22)   | 0.6 (0.75)    | 1.29 (1.95)   |
| DVU0756 | -      | TPR domain protein                                                 | -0.2 (-0.25)  | -0.59 (-0.84) | 0.3 (0.49)    |
| DVU0761 | -      | lipoprotein, putative                                              | -0.68 (-0.8)  | 0.42 (0.51)   | -1.01 (-1.44) |
| DVU0764 | hup-2  | DNA-binding protein HU                                             | 0.41 (0.46)   | 0.09 (0.07)   | 0.3 (0.49)    |
| DVU0774 | atpC   | ATP synthase, F1 epsilon subunit                                   | 1.62 (1.84)   | 0.4 (0.48)    | 1.15 (1.75)   |
| DVU0775 | atpD   | ATP synthase, F1 beta subunit                                      | -0.09 (-0.12) | -0.92 (-1.26) | 0.68 (1.05)   |
| DVU0776 | atpG   | ATP synthase, F1 gamma subunit                                     | 0.15 (0.16)   | -0.68 (-0.95) | 0.71 (1.1)    |
| DVU0777 | atpA   | ATP synthase, F1 alpha subunit                                     | 0.72 (0.81)   | 0.02 (-0.02)  | 0.64 (0.99)   |
| DVU0778 | atpH   | ATP synthase, F1 delta subunit                                     | 0.92 (1.04)   | -0.38 (-0.56) | 1.17 (1.78)   |
| DVU0779 | atpF2  | ATP synthase F0, B subunit, putative                               | 0.71 (0.8)    | 0.35 (0.41)   | 0.35 (0.57)   |
| DVU0780 | atpF1  | ATP synthase F0, B subunit, putative                               | 0 (-0.01)     | -0.36 (-0.53) | 0.3 (0.49)    |
| DVU0789 | mreB-1 | rod shape-determining protein MreB                                 | -0.63 (-0.74) | -0.25 (-0.38) | -0.38 (-0.52) |
| DVU0794 | fabI   | enoyl-acyl-carrier-protein reductase                               | -0.69 (-0.82) | -0.65 (-0.91) | -0.11 (-0.11) |
| DVU0795 | purC   | phosphoribosylaminoimidazole-succinocarboxamide synthase           | -0.33 (-0.4)  | -0.42 (-0.6)  | 0.02 (0.09)   |
| DVU0797 | -      | conserved hypothetical protein                                     | 2.15 (2.45)   | 3.08 (4.02)   | -0.61 (-0.85) |
| DVU0799 | -      | conserved hypothetical protein                                     | 3.02 (3.45)   | 3.65 (4.78)   | -0.29 (-0.38) |
| DVU0808 | gatA   | glutamyl-tRNA Gln amidotransferase, A subunit                      | -0.76 (-0.89) | 0.86 (1.09)   | -1.46 (-2.1)  |
| DVU0811 | dnaK   | dnaK protein                                                       | -1.04 (-1.22) | -0.52 (-0.74) | -0.55 (-0.76) |
| DVU0812 | grpE   | heat shock protein GrpE                                            | -0.07 (-0.1)  | -0.63 (-0.89) | 0.45 (0.72)   |
| DVU0819 | isf-1  | FMN reductase, NADPH-dependent                                     | 0.46 (0.52)   | 0.69 (0.87)   | -0.16 (-0.19) |
| DVU0823 | argJ   | arginine biosynthesis bifunctional protein ArgJ                    | -0.6 (-0.71)  | -0.97 (-1.34) | 0.25 (0.42)   |
| DVU0835 | rplS   | ribosomal protein L19                                              | 0.06 (0.05)   | -0.06 (-0.14) | 0.1 (0.2)     |
| DVU0838 | -      | conserved hypothetical protein                                     | -0.45 (-0.54) | -0.23 (-0.36) | -0.23 (-0.3)  |
| DVU0839 | rpsP   | ribosomal protein S16                                              | 0.35 (0.38)   | -0.01 (-0.07) | 0.33 (0.54)   |
| DVU0841 | -      | aspartate aminotransferase, putative                               | -0.55 (-0.65) | 0 (-0.06)     | -0.52 (-0.72) |
| DVU0846 | ApsB   | adenylylsulphate reductase, beta subunit                           | 0.29 (0.31)   | -0.76 (-1.05) | 0.9 (1.38)    |
| DVU0847 | ApsA   | adenylyl-sulphate reductase, alpha subunit                         | 0.1 (0.09)    | 0.71 (0.89)   | -0.52 (-0.72) |
| DVU0848 | QmoA   | Quinone-interacting membrane-bound oxidoreductase                  | 0.64 (0.71)   | 0.24 (0.27)   | 0.37 (0.59)   |
| DVU0849 | QmoB   | Quinone-interacting membrane-bound oxidoreductase                  | -0.15 (-0.19) | 0.22 (0.24)   | -0.34 (-0.45) |

|         |          |                                                                         |               |               |               |
|---------|----------|-------------------------------------------------------------------------|---------------|---------------|---------------|
| DVU0851 | -        | hypothetical protein                                                    | 1.42 (1.61)   | 0.02 (-0.02)  | 1.29 (1.96)   |
| DVU0856 | hemB     | porphobilinogen synthase                                                | 0 (-0.01)     | 0.18 (0.19)   | -0.17 (-0.2)  |
| DVU0857 | nirJ-1   | radical SAM domain protein                                              | 0.15 (0.16)   | 0.76 (0.95)   | -0.5 (-0.69)  |
| DVU0869 | uppS     | undecaprenyl diphosphate synthase                                       | -0.45 (-0.53) | -0.91 (-1.26) | 0.33 (0.53)   |
| DVU0870 | fr       | ribosome recycling factor                                               | -0.64 (-0.75) | 0.16 (0.16)   | -0.75 (-1.06) |
| DVU0873 | tsf      | translation elongation factor Ts                                        | -0.57 (-0.67) | -1.4 (-1.91)  | 0.64 (1)      |
| DVU0874 | rpsB     | ribosomal protein S2                                                    | -0.04 (-0.07) | -0.57 (-0.81) | 0.43 (0.68)   |
| DVU0890 | hom      | homoserine dehydrogenase                                                | -1.36 (-1.58) | -0.11 (-0.2)  | -1.18 (-1.69) |
| DVU0891 | -        | aminotransferase, classes I and II                                      | -1.06 (-1.24) | 0.23 (0.26)   | -1.21 (-1.74) |
| DVU0893 | -        | universal stress protein family                                         | 0.01 (0)      | 0.06 (0.04)   | -0.06 (-0.03) |
| DVU0894 | aroC     | chorismate synthase                                                     | -0.28 (-0.35) | -0.23 (-0.36) | -0.08 (-0.08) |
| DVU0900 | gmk      | guanylate kinase                                                        | -0.28 (-0.34) | -0.47 (-0.67) | 0.1 (0.2)     |
| DVU0902 | -        | TPR domain protein                                                      | 0.09 (0.09)   | -0.27 (-0.42) | 0.31 (0.51)   |
| DVU0927 | rplU     | ribosomal protein L21                                                   | 0.75 (0.84)   | -0.05 (-0.12) | 0.73 (1.13)   |
| DVU0928 | rpmA     | ribosomal protein L27                                                   | 1.14 (1.29)   | 0.18 (0.19)   | 0.89 (1.36)   |
| DVU0929 | obg      | GTP-binding protein, GTP1/OBG family                                    | 0.24 (0.26)   | 0.07 (0.05)   | 0.14 (0.26)   |
| DVU0951 | moeA-2   | molybdopterin biosynthesis MoeA protein, putative                       | -0.62 (-0.73) | -1.03 (-1.42) | 0.28 (0.46)   |
| DVU0953 | tyrS     | tyrosyl-tRNA synthetase                                                 | -0.72 (-0.85) | -0.63 (-0.89) | -0.15 (-0.17) |
| DVU0956 | rpsF     | ribosomal protein S6                                                    | 0.64 (0.72)   | 0.19 (0.2)    | 0.42 (0.67)   |
| DVU0957 | rpsR     | ribosomal protein S18                                                   | 0.11 (0.11)   | -0.57 (-0.81) | 0.58 (0.9)    |
| DVU0958 | rplI     | ribosomal protein L9                                                    | 0.69 (0.77)   | 0.15 (0.15)   | 0.5 (0.79)    |
| DVU0961 | -        | conserved hypothetical protein                                          | 0.18 (0.19)   | 0.39 (0.47)   | -0.18 (-0.22) |
| DVU0964 | fragment | Glu/Leu/Phe/Val dehydrogenase family protein                            | -0.56 (-0.66) | 0.47 (0.57)   | -0.94 (-1.33) |
| DVU0966 | -        | amino acid ABC transporter, periplasmic amino acid-binding protein      | -0.68 (-0.8)  | -1.2 (-1.64)  | 0.36 (0.59)   |
| DVU0979 | b1200    | DAK1 domain protein                                                     | 0.88 (1)      | 1.07 (1.36)   | -0.09 (-0.08) |
| DVU0987 | -        | heavy metal-binding domain protein                                      | 0.7 (0.79)    | 0.32 (0.37)   | 0.36 (0.58)   |
| DVU0988 | cbhK     | carbohydrate kinase, PfkB family                                        | -0.88 (-1.03) | -0.69 (-0.96) | -0.25 (-0.31) |
| DVU0992 | cheV-3   | chemotaxis protein CheV                                                 | 0.29 (0.32)   | -0.14 (-0.24) | 0.37 (0.6)    |
| DVU0995 | -        | ThiJ/PfpI family protein                                                | -0.83 (-0.97) | -0.38 (-0.55) | -0.47 (-0.64) |
| DVU0997 | metF     | 5,10-methylenetetrahydrofolate reductase                                | -1.79 (-2.08) | -0.15 (-0.25) | -1.57 (-2.26) |
| DVU1012 | -        | hemolysin-type calcium-binding repeat protein                           | 1.33 (1.51)   | 0.73 (0.92)   | 0.61 (0.94)   |
| DVU1013 | -        | type I secretion outer membrane protein, TolC family                    | 0.12 (0.13)   | 0.2 (0.21)    | -0.06 (-0.04) |
| DVU1021 | -        | conserved hypothetical protein                                          | -0.45 (-0.53) | -0.6 (-0.85)  | 0.07 (0.16)   |
| DVU1025 | upp      | uracil phosphoribosyltransferase                                        | 0.3 (0.33)    | -0.24 (-0.37) | 0.47 (0.75)   |
| DVU1030 | -        | universal stress protein family                                         | 0.18 (0.19)   | 0.3 (0.34)    | -0.1 (-0.09)  |
| DVU1038 | hisA     | phosphoribosylformimino-5-aminoimidazole carboxamide ribotide isomerase | -1.56 (-1.81) | -0.95 (-1.31) | -0.66 (-0.93) |
| DVU1044 | guaB     | inosine-5'-monophosphate dehydrogenase                                  | 0.17 (0.18)   | -0.06 (-0.13) | 0.2 (0.34)    |
| DVU1064 | aco      | aconitate hydratase, putative                                           | -0.93 (-1.09) | 0.5 (0.62)    | -1.33 (-1.91) |
| DVU1065 | -        | peptidyl-prolyl cis-trans isomerase domain protein                      | -1.42 (-1.65) | -0.79 (-1.1)  | -0.67 (-0.94) |
| DVU1066 | gpt      | xanthine-guanine phosphoribosyltransferase                              | 0.39 (0.43)   | -0.14 (-0.23) | 0.47 (0.74)   |
| DVU1067 | -        | membrane protein, Bmp family                                            | 0.84 (0.95)   | 1.6 (2.06)    | -0.58 (-0.81) |
| DVU1074 | rpmH     | ribosomal protein L34                                                   | 1.15 (1.31)   | -0.4 (-0.58)  | 1.4 (2.11)    |
| DVU1078 | -        | R3H domain protein                                                      | 0.45 (0.5)    | -0.22 (-0.35) | 0.6 (0.93)    |
| DVU1090 | recA     | recA protein                                                            | -0.01 (-0.03) | 0.09 (0.07)   | -0.1 (-0.11)  |
| DVU1094 | argH     | argininosuccinate lyase                                                 | -0.98 (-1.14) | 0.1 (0.08)    | -1.01 (-1.44) |
| DVU1095 | argG     | argininosuccinate synthase                                              | -1.96 (-2.27) | -0.36 (-0.53) | -1.54 (-2.22) |
| DVU1096 | argF     | ornithine carbamoyltransferase                                          | -0.55 (-0.65) | -0.15 (-0.25) | -0.41 (-0.55) |
| DVU1174 | -        | hypothetical protein                                                    | 0.65 (0.73)   | 0.62 (0.77)   | 0.07 (0.15)   |
| DVU1176 | -        | hypothetical protein                                                    | -0.37 (-0.45) | -1.22 (-1.66) | 0.66 (1.02)   |
| DVU1177 | -        | hypothetical protein                                                    | -0.34 (-0.4)  | -0.44 (-0.64) | 0.05 (0.12)   |
| DVU1179 | aor      | aldehyde:ferredoxin oxidoreductase, tungsten-containing                 | 0.47 (0.53)   | 0.77 (0.96)   | -0.22 (-0.27) |
| DVU1197 | nusB     | N utilization substance protein B                                       | 0.67 (0.76)   | 0.69 (0.86)   | 0.03 (0.09)   |
| DVU1198 | ribH     | riboflavin synthase, beta subunit                                       | 0.3 (0.33)    | -0.33 (-0.49) | 0.56 (0.87)   |
| DVU1199 | ribAB    | 3,4-dihydroxy-2-butanone 4-phosphate synthase/GTP cyclohydrolase II     | -0.38 (-0.45) | -0.8 (-1.1)   | 0.3 (0.5)     |
| DVU1203 | glyA     | serine hydroxymethyltransferase                                         | -0.81 (-0.94) | -0.57 (-0.81) | -0.28 (-0.36) |
| DVU1204 | fabF     | 3-oxoacyl-acyl-carrier-protein synthase II                              | 1.02 (1.16)   | 0.24 (0.26)   | 0.74 (1.15)   |
| DVU1206 | fabG     | 3-oxoacyl-acyl-carrier-protein reductase                                | -0.69 (-0.81) | -0.46 (-0.67) | -0.26 (-0.33) |

|         |        |                                                                    |               |               |               |
|---------|--------|--------------------------------------------------------------------|---------------|---------------|---------------|
| DVU1207 | fabH   | 3-oxoacyl-acyl-carrier-protein synthase III                        | -1.72 (-2)    | -1.04 (-1.42) | -0.74 (-1.05) |
| DVU1211 | rpmB   | ribosomal protein L28                                              | 0.16 (0.16)   | -0.46 (-0.65) | 0.52 (0.82)   |
| DVU1222 | -      | hypothetical protein                                               | -0.19 (-0.23) | -0.95 (-1.31) | 0.62 (0.96)   |
| DVU1228 | tpX    | thiol peroxidase                                                   | 0.12 (0.12)   | -0.39 (-0.57) | 0.43 (0.68)   |
| DVU1232 | glnB-1 | nitrogen regulatory protein P-II                                   | 0.61 (0.69)   | 1.38 (1.77)   | -0.6 (-0.84)  |
| DVU1236 | -      | amino acid ABC transporter, ATP-binding protein                    | -0.87 (-1.02) | -1.24 (-1.69) | 0.21 (0.37)   |
| DVU1238 | -      | amino acid ABC transporter, periplasmic amino acid-binding protein | 0.86 (0.98)   | -0.06 (-0.13) | 0.85 (1.3)    |
| DVU1241 | -      | conserved hypothetical protein                                     | -2.55 (-2.95) | 0.96 (1.22)   | -3.21 (-4.67) |
| DVU1248 | argS   | arginyl-tRNA synthetase                                            | -0.1 (-0.13)  | 0 (-0.03)     | -0.11 (-0.12) |
| DVU1249 | fabD   | malonyl CoA-acyl carrier protein transacylase                      | -0.5 (-0.59)  | -0.74 (-1.04) | 0.15 (0.27)   |
| DVU1251 | -      | hypothetical protein                                               | 0.97 (1.1)    | 0.58 (0.71)   | 0.39 (0.63)   |
| DVU1257 | -      | RNA-binding protein                                                | -0.15 (-0.19) | -2 (-2.69)    | 1.53 (2.3)    |
| DVU1265 | -      | hypothetical protein                                               | 0.72 (0.81)   | 0.6 (0.75)    | 0.15 (0.27)   |
| DVU1279 | folP   | dihydropteroate synthase                                           | 0.37 (0.41)   | -0.36 (-0.53) | 0.64 (1)      |
| DVU1283 | galU   | UTP-glucose-1-phosphate uridylyltransferase                        | -1.19 (-1.38) | -0.88 (-1.21) | -0.38 (-0.51) |
| DVU1287 | DsrO   | Periplasmic Tat, binds 2[4Fe-4S]                                   | 0.53 (0.59)   | 0.44 (0.53)   | 0.11 (0.22)   |
| DVU1289 | DsrK   | Cytoplasmic, binds 2 [4Fe-4S]                                      | 0.26 (0.28)   | 0.22 (0.24)   | 0.04 (0.11)   |
| DVU1290 | DsrM   | Inner membrane protein binds 2 heme b                              | 1.49 (1.69)   | 0.61 (0.76)   | 0.85 (1.3)    |
| DVU1295 | sat    | sulfate adenyllyltransferase                                       | 0.91 (1.03)   | 1.17 (1.5)    | -0.15 (-0.17) |
| DVU1298 | rpsL   | ribosomal protein S12                                              | -0.59 (-0.7)  | -0.76 (-1.06) | 0.08 (0.17)   |
| DVU1299 | rpsG   | ribosomal protein S7                                               | 0.95 (1.07)   | 0.3 (0.35)    | 0.61 (0.95)   |
| DVU1300 | fusA-1 | translation elongation factor G                                    | -0.64 (-0.75) | 0.99 (1.26)   | -1.46 (-2.1)  |
| DVU1302 | rpsJ   | ribosomal protein S10                                              | 0.82 (0.92)   | 0.13 (0.12)   | 0.64 (0.99)   |
| DVU1303 | rplC   | ribosomal protein L3                                               | 0.3 (0.32)    | -0.41 (-0.6)  | 0.62 (0.96)   |
| DVU1304 | rplD   | ribosomal protein L4                                               | 0.1 (0.09)    | -0.06 (-0.13) | 0.13 (0.24)   |
| DVU1305 | rplW   | ribosomal protein L23                                              | 0.61 (0.68)   | -0.15 (-0.25) | 0.68 (1.06)   |
| DVU1306 | rplB   | ribosomal protein L2                                               | -0.72 (-0.85) | -1.17 (-1.6)  | 0.3 (0.5)     |
| DVU1307 | rpsS   | ribosomal protein S19                                              | 0.46 (0.51)   | -0.14 (-0.23) | 0.54 (0.84)   |
| DVU1308 | rplV   | ribosomal protein L22                                              | -0.37 (-0.44) | -0.58 (-0.81) | 0.12 (0.23)   |
| DVU1309 | rpsC   | ribosomal protein S3                                               | 0.15 (0.16)   | -0.41 (-0.6)  | 0.48 (0.76)   |
| DVU1310 | rplP   | ribosomal protein L16                                              | 0.03 (0.02)   | -0.65 (-0.92) | 0.58 (0.9)    |
| DVU1311 | rpmC   | ribosomal protein L29                                              | 0.36 (0.4)    | -0.26 (-0.39) | 0.55 (0.86)   |
| DVU1312 | rpsQ   | ribosomal protein S17                                              | 0.26 (0.29)   | 0.25 (0.28)   | 0.02 (0.08)   |
| DVU1313 | rplN   | ribosomal protein L14                                              | -0.27 (-0.33) | -0.8 (-1.1)   | 0.4 (0.65)    |
| DVU1315 | rplE   | ribosomal protein L5                                               | 0.37 (0.41)   | -0.42 (-0.61) | 0.7 (1.08)    |
| DVU1316 | rpsN   | ribosomal protein S14                                              | 0.55 (0.62)   | -0.29 (-0.44) | 0.75 (1.16)   |
| DVU1317 | rpsH   | ribosomal protein S8                                               | -0.29 (-0.35) | -0.36 (-0.53) | 0.03 (0.09)   |
| DVU1318 | rplF   | ribosomal protein L6                                               | 0.25 (0.27)   | -0.25 (-0.38) | 0.43 (0.69)   |
| DVU1319 | rplR   | ribosomal protein L18                                              | 0.67 (0.75)   | 0.2 (0.22)    | 0.43 (0.69)   |
| DVU1320 | rpsE   | ribosomal protein S5                                               | 0.08 (0.07)   | 0 (-0.06)     | 0.07 (0.15)   |
| DVU1321 | rpmD   | ribosomal protein L30                                              | 0.3 (0.33)    | -0.06 (-0.13) | 0.32 (0.52)   |
| DVU1322 | rplO   | ribosomal protein L15                                              | -0.1 (-0.14)  | -0.73 (-1.02) | 0.5 (0.8)     |
| DVU1326 | rpsM   | ribosomal protein S13                                              | 0.34 (0.37)   | -0.44 (-0.64) | 0.68 (1.06)   |
| DVU1327 | rpsK   | ribosomal protein S11                                              | -0.6 (-0.71)  | -0.23 (-0.35) | -0.39 (-0.53) |
| DVU1328 | rpsD   | ribosomal protein S4                                               | -0.49 (-0.58) | -0.94 (-1.3)  | 0.32 (0.52)   |
| DVU1329 | rpoA   | DNA-directed RNA polymerase, alpha subunit                         | -0.49 (-0.58) | -0.99 (-1.36) | 0.36 (0.58)   |
| DVU1330 | rplQ   | ribosomal protein L17                                              | 0.2 (0.21)    | -0.19 (-0.31) | 0.32 (0.53)   |
| DVU1334 | tig    | trigger factor                                                     | 0.49 (0.55)   | 0.11 (0.09)   | 0.35 (0.57)   |
| DVU1336 | clpX   | ATP-dependent Clp protease, ATP-binding subunit ClpX               | -1.02 (-1.19) | -1.12 (-1.53) | 0 (0.03)      |
| DVU1337 | lon    | ATP-dependent protease La                                          | -1.09 (-1.27) | -0.75 (-1.04) | -0.4 (-0.54)  |
| DVU1343 | znuA   | periplasmic component of zinc ABC transporter                      | -1.48 (-1.72) | -0.54 (-0.76) | -0.95 (-1.35) |
| DVU1344 | ispG   | 1-hydroxy-2-methyl-2-E-butenyl 4-diphosphate synthase              | -0.09 (-0.12) | -1.05 (-1.44) | 0.79 (1.22)   |
| DVU1360 | galE   | UDP-glucose 4-epimerase                                            | 0.19 (0.2)    | 0.33 (0.38)   | -0.1 (-0.1)   |
| DVU1368 | -      | rhodanese-like domain protein                                      | -0.79 (-0.92) | 0.06 (0.03)   | -0.81 (-1.14) |
| DVU1375 | -      | hypothetical protein                                               | 1.25 (1.42)   | 1.52 (1.96)   | -0.13 (-0.15) |
| DVU1378 | ilvC   | ketol-acid reductoisomerase                                        | -0.88 (-1.03) | -0.62 (-0.87) | -0.31 (-0.41) |
| DVU1397 | bfr    | bacterioferritin                                                   | 0.56 (0.63)   | 0.89 (1.12)   | -0.24 (-0.3)  |
| DVU1406 | purM   | phosphoribosylformylglycinamide cyclo-ligase                       | -0.03 (-0.05) | 0.27 (0.31)   | -0.28 (-0.36) |

|         |        |                                                                |               |               |               |
|---------|--------|----------------------------------------------------------------|---------------|---------------|---------------|
| DVU1411 | thiC   | thiamine biosynthesis protein ThiC                             | -0.96 (-1.12) | -0.27 (-0.41) | -0.67 (-0.94) |
| DVU1420 | -      | Hpt domain protein                                             | 0.47 (0.53)   | 0.88 (1.11)   | -0.31 (-0.41) |
| DVU1422 | -      | OmpA family protein                                            | -0.86 (-1.01) | 1.06 (1.35)   | -1.73 (-2.5)  |
| DVU1424 | gcvPB  | glycine cleavage system P protein, subunit 2                   | -0.58 (-0.68) | -0.18 (-0.29) | -0.37 (-0.5)  |
| DVU1427 | -      | response regulator                                             | 0.45 (0.5)    | 0.14 (0.14)   | 0.28 (0.46)   |
| DVU1430 | -      | peptidase, M16 family                                          | 0.28 (0.31)   | 0.25 (0.28)   | 0.02 (0.09)   |
| DVU1431 | -      | hpt domain protein/STAS domain protein                         | 1.31 (1.49)   | 0.53 (0.65)   | 0.76 (1.17)   |
| DVU1434 | -      | hypothetical protein                                           | 0.2 (0.21)    | -0.36 (-0.52) | 0.48 (0.76)   |
| DVU1441 | flaB1  | flagellin                                                      | 0.44 (0.49)   | 0.18 (0.19)   | 0.24 (0.4)    |
| DVU1443 | flgE   | flagellar hook protein FlgE                                    | 1.09 (1.24)   | 1.29 (1.66)   | -0.08 (-0.07) |
| DVU1455 | -      | conserved hypothetical protein                                 | 0.04 (0.03)   | -0.1 (-0.18)  | 0.11 (0.21)   |
| DVU1457 | trxB   | thioredoxin reductase, putative                                | 0.04 (0.02)   | 0.37 (0.44)   | -0.29 (-0.38) |
| DVU1458 | -      | chemotaxis protein CheZ, putative                              | 0.48 (0.54)   | 0.11 (0.1)    | 0.34 (0.55)   |
| DVU1466 | argB   | acetylglutamate kinase                                         | 0.08 (0.07)   | -0.47 (-0.67) | 0.46 (0.73)   |
| DVU1467 | hslU   | heat shock protein HslVU, ATPase subunit HslU                  | -0.54 (-0.63) | -0.6 (-0.84)  | 0 (0.03)      |
| DVU1468 | htrA   | peptidase/PDZ domain protein                                   | 0.35 (0.39)   | 0.73 (0.92)   | -0.3 (-0.4)   |
| DVU1469 | rpsA   | ribosomal protein S1, putative                                 | 0.12 (0.13)   | -0.58 (-0.81) | 0.59 (0.92)   |
| DVU1470 | ppiC   | peptidyl-prolyl cis-trans isomerase C                          | 0.65 (0.73)   | 0 (-0.06)     | 0.6 (0.94)    |
| DVU1537 | -      | lipoprotein, putative                                          | -0.31 (-0.37) | -0.05 (-0.12) | -0.26 (-0.33) |
| DVU1539 | glpX   | fructose-1,6-bisphosphatase, class II                          | 0.02 (0.01)   | -0.29 (-0.43) | 0.25 (0.43)   |
| DVU1545 | -      | hemolysin-type calcium-binding repeat/calx-beta domain protein | 0.92 (1.04)   | -0.04 (-0.1)  | 0.89 (1.36)   |
| DVU1568 | ftn    | ferritin                                                       | 0.53 (0.59)   | 0.77 (0.97)   | -0.18 (-0.21) |
| DVU1569 | porA   | pyruvate ferredoxin oxidoreductase, alpha subunit              | -0.39 (-0.46) | 1.06 (1.35)   | -1.28 (-1.84) |
| DVU1570 | porB   | pyruvate ferredoxin oxidoreductase, beta subunit               | -0.1 (-0.14)  | 1.25 (1.6)    | -1.16 (-1.66) |
| DVU1574 | rplY   | ribosomal protein L25                                          | 0.79 (0.89)   | 0.12 (0.1)    | 0.62 (0.97)   |
| DVU1575 | prsA   | ribose-phosphate pyrophosphokinase                             | -0.36 (-0.43) | 0.27 (0.31)   | -0.58 (-0.81) |
| DVU1580 | rpiB   | ribose 5-phosphate isomerase, putative                         | 0.36 (0.4)    | -0.45 (-0.65) | 0.72 (1.11)   |
| DVU1588 | hpt    | hypoxanthine phosphoribosyltransferase                         | -0.31 (-0.37) | -0.04 (-0.11) | -0.27 (-0.35) |
| DVU1593 | cheY-1 | chemotaxis protein CheY                                        | -0.23 (-0.29) | 0.38 (0.46)   | -0.57 (-0.78) |
| DVU1597 | sir    | sulfite reductase, assimilatory-type                           | 0.27 (0.29)   | 0.47 (0.57)   | -0.16 (-0.18) |
| DVU1602 | clpA   | ATP-dependent Clp protease, ATP-binding subunit ClpA           | -0.09 (-0.12) | 0.1 (0.08)    | -0.19 (-0.23) |
| DVU1604 | -      | hypothetical protein                                           | -0.58 (-0.68) | -0.72 (-1)    | 0.04 (0.12)   |
| DVU1612 | -      | ACT domain protein                                             | 0.38 (0.42)   | 0.64 (0.8)    | -0.2 (-0.25)  |
| DVU1618 | -      | iojap-related protein                                          | -0.5 (-0.59)  | -0.37 (-0.54) | -0.16 (-0.19) |
| DVU1621 | -      | hypothetical protein                                           | 0.28 (0.3)    | 0.23 (0.26)   | 0.05 (0.12)   |
| DVU1622 | purQ   | phosphoribosylformylglycinamide synthase I                     | -0.09 (-0.12) | -0.59 (-0.83) | 0.4 (0.64)    |
| DVU1627 | -      | ABC transporter, ATP-binding protein                           | -0.72 (-0.85) | -0.13 (-0.23) | -0.58 (-0.81) |
| DVU1629 | yfiA   | ribosomal subunit interface protein                            | 0.52 (0.58)   | 0.55 (0.67)   | 0 (0.05)      |
| DVU1636 | ppaC   | inorganic pyrophosphatase, manganese-dependent                 | 1.03 (1.16)   | -0.28 (-0.42) | 1.19 (1.81)   |
| DVU1655 | aspC4  | aminotransferase, classes I and II                             | 0.56 (0.63)   | 1.35 (1.74)   | -0.64 (-0.89) |
| DVU1664 | -      | GTP-binding protein                                            | 0.03 (0.01)   | -0.06 (-0.13) | 0.06 (0.14)   |
| DVU1666 | efp    | translation elongation factor P                                | 0.82 (0.92)   | 0.27 (0.31)   | 0.51 (0.8)    |
| DVU1677 | tpiA   | triosephosphate isomerase                                      | 0.34 (0.37)   | 1.44 (1.85)   | -0.92 (-1.31) |
| DVU1681 | mreB-2 | rod shape-determining protein MreB                             | -0.17 (-0.21) | -0.41 (-0.59) | 0.17 (0.31)   |
| DVU1684 | gcvT   | glycine cleavage system T protein                              | -0.68 (-0.8)  | -0.35 (-0.52) | -0.35 (-0.46) |
| DVU1685 | -      | conserved hypothetical protein TIGR00046                       | -0.12 (-0.15) | 0.13 (0.12)   | -0.26 (-0.33) |
| DVU1690 | -      | transcriptional regulator, TetR family                         | 0.43 (0.47)   | -0.12 (-0.21) | 0.49 (0.77)   |
| DVU1703 | -      | type I restriction-modification enzyme, R subunit              | 0.82 (0.92)   | 0.35 (0.41)   | 0.46 (0.72)   |
| DVU1784 | -      | oxidoreductase, short-chain dehydrogenase/reductase family     | -0.43 (-0.51) | 0.01 (-0.02)  | -0.43 (-0.58) |
| DVU1791 | -      | GatB/Yqey family protein                                       | 1.63 (1.85)   | 0.83 (1.05)   | 0.8 (1.22)    |
| DVU1792 | rpsU   | ribosomal protein S21                                          | 0.22 (0.23)   | -1.03 (-1.42) | 1.07 (1.63)   |
| DVU1795 | hup-3  | DNA-binding protein HU                                         | 1.34 (1.53)   | 0.35 (0.41)   | 0.95 (1.45)   |
| DVU1817 | cyf    | cytochrome c-553                                               | 2.31 (2.64)   | 2.44 (3.18)   | 0.07 (0.16)   |
| DVU1819 | secD   | protein-export membrane protein SecD                           | -0.73 (-0.85) | -0.39 (-0.56) | -0.37 (-0.5)  |
| DVU1820 | yajC   | preprotein translocase, YajC subunit                           | 0.44 (0.49)   | 0.9 (1.14)    | -0.37 (-0.49) |
| DVU1826 | -      | hypothetical protein                                           | 0.77 (0.87)   | -0.46 (-0.65) | 1.1 (1.67)    |

|         |        |                                                                      |               |               |               |
|---------|--------|----------------------------------------------------------------------|---------------|---------------|---------------|
| DVU1827 | -      | acetylornithine deacetylase/succinyl-diaminopimelate desuccinylase   | -1.39 (-1.62) | -1.36 (-1.85) | -0.15 (-0.17) |
| DVU1833 | ppsA   | phosphoenolpyruvate synthase, putative                               | -0.4 (-0.48)  | 0.1 (0.08)    | -0.48 (-0.66) |
| DVU1834 | pyc    | pyruvate carboxylase, putative                                       | -0.71 (-0.83) | -0.07 (-0.15) | -0.61 (-0.85) |
| DVU1838 | trxB-2 | thioredoxin reductase                                                | 0.38 (0.42)   | 0.14 (0.13)   | 0.22 (0.38)   |
| DVU1839 | trx    | thioredoxin                                                          | -0.57 (-0.68) | -0.62 (-0.87) | -0.02 (0.01)  |
| DVU1850 | -      | CBS domain protein                                                   | 1.29 (1.46)   | 0.63 (0.78)   | 0.65 (1.01)   |
| DVU1857 | -      | methyl-accepting chemotaxis protein                                  | 0.4 (0.44)    | 0.75 (0.95)   | -0.28 (-0.36) |
| DVU1864 | ihfB   | DNA-binding protein HU, beta subunit, putative                       | 0.63 (0.71)   | 0.35 (0.42)   | 0.27 (0.44)   |
| DVU1868 | dapA   | dihydrodipicolinate synthase                                         | -1.02 (-1.19) | -0.5 (-0.71)  | -0.53 (-0.73) |
| DVU1873 | ppiB-2 | peptidyl-prolyl cis-trans isomerase B                                | -1.78 (-2.07) | -1.35 (-1.84) | -0.53 (-0.73) |
| DVU1874 | clpB   | ATP-dependent Clp protease, ATP-binding subunit ClpB                 | -1.14 (-1.33) | -0.16 (-0.27) | -0.93 (-1.32) |
| DVU1876 | dnaJ   | dnaJ protein, putative                                               | 0.99 (1.13)   | 1.56 (2.02)   | -0.41 (-0.55) |
| DVU1878 | ltaE   | threonine aldolase, low-specificity                                  | -1.54 (-1.79) | -0.08 (-0.16) | -1.39 (-1.99) |
| DVU1885 | gatB   | glutamyl-tRNA Gln amidotransferase, B subunit                        | -0.84 (-0.98) | -0.67 (-0.94) | -0.23 (-0.29) |
| DVU1886 | -      | hypothetical protein                                                 | -0.33 (-0.39) | -0.76 (-1.06) | 0.31 (0.51)   |
| DVU1890 | hemC   | porphobilinogen deaminase                                            | 0.03 (0.01)   | -0.12 (-0.21) | 0.11 (0.21)   |
| DVU1891 | -      | conserved hypothetical protein                                       | -0.24 (-0.3)  | -0.71 (-0.99) | 0.35 (0.56)   |
| DVU1901 | -      | peptidyl-prolyl cis-trans isomerase domain protein                   | 0.06 (0.05)   | -0.15 (-0.25) | 0.17 (0.31)   |
| DVU1908 | pdxJ   | pyridoxal phosphate biosynthetic protein PdxJ                        | 0.87 (0.98)   | 1.06 (1.35)   | -0.09 (-0.08) |
| DVU1911 | -      | CBS domain protein                                                   | -0.42 (-0.5)  | -0.66 (-0.92) | 0.14 (0.26)   |
| DVU1913 | -      | aspartate kinase, monofunctional class                               | -0.44 (-0.53) | 0.05 (0.01)   | -0.47 (-0.65) |
| DVU1917 | hysB   | periplasmic [NiFeSe] hydrogenase, small subunit                      | 1.69 (1.92)   | 0.65 (0.81)   | 1 (1.53)      |
| DVU1918 | hysA   | periplasmic [NiFeSe] hydrogenase, large subunit                      | 1.62 (1.85)   | 0.78 (0.99)   | 0.83 (1.28)   |
| DVU1919 | -      | hydrogenase expression/formation protein, putative                   | 0.25 (0.27)   | -0.61 (-0.86) | 0.75 (1.15)   |
| DVU1922 | hynA-1 | periplasmic [NiFe] hydrogenase, large subunit, isozyme 1             | 0.03 (0.02)   | 0.47 (0.57)   | -0.37 (-0.49) |
| DVU1932 | adk    | adenylate kinase                                                     | 0.77 (0.87)   | -0.26 (-0.4)  | 0.93 (1.42)   |
| DVU1936 | phnC   | phosphonate ABC transporter, ATP-binding protein                     | -0.59 (-0.7)  | -0.8 (-1.1)   | 0.1 (0.2)     |
| DVU1937 | -      | phosphonate ABC transporter, periplasmic phosphonate-binding protein | 1.63 (1.86)   | 0.88 (1.11)   | 0.76 (1.18)   |
| DVU1950 | -      | indolepyruvate ferredoxin oxidoreductase, beta subunit, putative     | -0.94 (-1.1)  | -1.46 (-1.98) | 0.33 (0.55)   |
| DVU1952 | -      | hypothetical protein                                                 | -0.8 (-0.93)  | -0.91 (-1.25) | 0.01 (0.07)   |
| DVU1953 | proA   | gamma-glutamyl phosphate reductase                                   | -0.3 (-0.36)  | 0.7 (0.87)    | -0.91 (-1.29) |
| DVU1964 | -      | transcriptional regulator, rrf2 protein, putative                    | -0.34 (-0.41) | -0.15 (-0.26) | -0.19 (-0.23) |
| DVU1973 | -      | rhodanese-like domain protein                                        | -0.56 (-0.66) | 0.01 (-0.03)  | -0.55 (-0.77) |
| DVU1976 | groEL  | chaperonin, 60 kDa                                                   | -0.35 (-0.42) | -0.51 (-0.73) | 0.09 (0.18)   |
| DVU1977 | groES  | chaperonin, 10 kDa                                                   | 0.98 (1.11)   | 0.55 (0.67)   | 0.43 (0.69)   |
| DVU1981 | -      | conserved hypothetical protein                                       | 0.68 (0.76)   | -0.32 (-0.48) | 0.9 (1.38)    |
| DVU1986 | -      | conserved hypothetical protein                                       | 1.37 (1.56)   | 0.8 (1.01)    | 0.58 (0.91)   |
| DVU2013 | -      | hybrid cluster protein                                               | 1.31 (1.49)   | 0.77 (0.97)   | 0.56 (0.87)   |
| DVU2014 | fprA-1 | metallo-beta-lactamase family protein                                | 0.99 (1.12)   | 0.36 (0.42)   | 0.61 (0.95)   |
| DVU2072 | cheA-3 | chemotaxis protein CheA                                              | -0.89 (-1.04) | -0.84 (-1.17) | -0.13 (-0.14) |
| DVU2073 | cheY-2 | chemotaxis protein CheY                                              | 0.71 (0.8)    | 0.44 (0.54)   | 0.26 (0.44)   |
| DVU2078 | cheB-2 | protein-glutamate methyltransferase CheB                             | -1.04 (-1.21) | -1.25 (-1.7)  | 0.06 (0.15)   |
| DVU2082 | flaD   | flagellin, putative                                                  | 0.28 (0.3)    | 0.79 (0.99)   | -0.41 (-0.56) |
| DVU2093 | thiH   | thiH protein                                                         | -1.45 (-1.69) | -0.55 (-0.77) | -0.9 (-1.28)  |
| DVU2094 | thiG   | thiG protein                                                         | -1.69 (-1.97) | -1.29 (-1.76) | -0.5 (-0.69)  |
| DVU2100 | -      | universal stress protein family                                      | 1.21 (1.37)   | 1.85 (2.39)   | -0.45 (-0.61) |
| DVU2103 | -      | iron-sulfur cluster-binding/ATPase domain protein                    | -1.08 (-1.26) | -0.68 (-0.95) | -0.45 (-0.61) |
| DVU2105 | -      | hypothetical protein                                                 | -0.17 (-0.21) | 0.64 (0.79)   | -0.72 (-1.01) |
| DVU2108 | -      | MTH1175-like domain family protein                                   | -0.38 (-0.45) | -0.26 (-0.4)  | -0.14 (-0.16) |
| DVU2109 | mrp    | MTH1175-like domain family protein                                   | -0.39 (-0.47) | -0.07 (-0.14) | -0.32 (-0.42) |
| DVU2135 | -      | hypothetical protein                                                 | 1.56 (1.77)   | 2.39 (3.1)    | -0.58 (-0.8)  |
| DVU2138 | -      | conserved hypothetical protein                                       | 0.54 (0.61)   | 0.21 (0.23)   | 0.31 (0.51)   |

|         |           |                                                                        |               |               |               |
|---------|-----------|------------------------------------------------------------------------|---------------|---------------|---------------|
| DVU2140 | tmk       | thymidylate kinase                                                     | 0.28 (0.31)   | 0.24 (0.27)   | 0.04 (0.11)   |
| DVU2143 | fba       | fructose-1,6-bisphosphate aldolase, class II                           | 0.15 (0.16)   | 0.51 (0.62)   | -0.3 (-0.4)   |
| DVU2144 | gap-2     | glyceraldehyde 3-phosphate dehydrogenase                               | 0.68 (0.77)   | 0.25 (0.28)   | 0.41 (0.65)   |
| DVU2150 | dksA      | dnaK suppressor protein, putative                                      | 0.57 (0.64)   | 0.07 (0.05)   | 0.46 (0.73)   |
| DVU2201 | b3011     | alcohol dehydrogenase, iron-containing                                 | 0.04 (0.03)   | 0.15 (0.15)   | -0.11 (-0.11) |
| DVU2203 | -         | endoribonuclease, L-PSP family                                         | 1.16 (1.31)   | -0.91 (-1.26) | 1.85 (2.77)   |
| DVU2212 | -         | conserved hypothetical protein                                         | 0.03 (0.02)   | -0.29 (-0.44) | 0.27 (0.45)   |
| DVU2215 | -         | RNA-binding protein                                                    | -0.12 (-0.16) | 0.47 (0.57)   | -0.53 (-0.73) |
| DVU2222 | ssb       | single-strand binding protein                                          | -0.52 (-0.61) | -0.75 (-1.04) | 0.13 (0.25)   |
| DVU2224 | -         | hypothetical protein                                                   | 0.72 (0.81)   | 0.2 (0.22)    | 0.48 (0.76)   |
| DVU2226 | accC      | acetyl-CoA carboxylase, biotin carboxylase, putative                   | -0.91 (-1.06) | -0.01 (-0.06) | -0.86 (-1.21) |
| DVU2231 | typA      | GTP-binding protein TypA                                               | -1.06 (-1.24) | -0.35 (-0.52) | -0.71 (-1)    |
| DVU2247 | ahpC      | alkyl hydroperoxide reductase C                                        | -0.42 (-0.5)  | -0.16 (-0.27) | -0.27 (-0.35) |
| DVU2250 | -         | AMP-binding protein                                                    | -1.13 (-1.32) | -0.9 (-1.24)  | -0.32 (-0.42) |
| DVU2259 | -         | conserved hypothetical protein TIGR01033                               | -0.57 (-0.68) | -0.99 (-1.36) | 0.28 (0.47)   |
| DVU2290 | -         | hydrogenase, CooU subunit, putative                                    | -1.13 (-1.32) | -1.37 (-1.86) | 0.08 (0.17)   |
| DVU2291 | -         | carbon monoxide-induced hydrogenase CooH, putative                     | -0.97 (-1.14) | -1.33 (-1.81) | 0.19 (0.34)   |
| DVU2297 | -         | glycine/betaine/L-proline ABC transporter, periplasmic-binding protein | 0.4 (0.44)    | 0.33 (0.39)   | 0.07 (0.16)   |
| DVU2299 | proV      | glycine/betaine/L-proline ABC transporter, ATP binding protein         | 0.22 (0.24)   | -0.35 (-0.51) | 0.49 (0.78)   |
| DVU2310 | -         | metallo-beta-lactamase family protein                                  | 0.62 (0.7)    | 0.16 (0.16)   | 0.42 (0.67)   |
| DVU2313 | pgl       | 6-phosphogluconolactonase                                              | -0.66 (-0.78) | -0.04 (-0.11) | -0.6 (-0.83)  |
| DVU2318 | rbr2      | rubrerythrin, putative                                                 | 1.02 (1.16)   | -0.22 (-0.34) | 1.14 (1.72)   |
| DVU2325 | merP      | mercuric transport protein periplasmic component                       | 0.73 (0.82)   | 0.44 (0.54)   | 0.29 (0.47)   |
| DVU2326 | -         | conserved domain protein                                               | -0.36 (-0.43) | 0.44 (0.53)   | -0.73 (-1.03) |
| DVU2329 | hypB      | hydrogenase accessory protein HypB                                     | -0.63 (-0.75) | -0.82 (-1.13) | 0.08 (0.17)   |
| DVU2330 | E.coliMin | MRP family protein                                                     | 0.75 (0.85)   | 0.94 (1.19)   | -0.11 (-0.11) |
| DVU2333 | ndk       | nucleoside diphosphate kinase                                          | 1.77 (2.02)   | 0.42 (0.5)    | 1.28 (1.94)   |
| DVU2336 | -         | carboxyl-terminal protease                                             | 0.46 (0.51)   | 0.2 (0.21)    | 0.24 (0.41)   |
| DVU2342 | -         | amino acid ABC transporter, periplasmic amino acid-binding protein     | 2.34 (2.67)   | 1.5 (1.93)    | 0.9 (1.38)    |
| DVU2347 | argD      | acetylmethionine aminotransferase                                      | -1.51 (-1.75) | 0.64 (0.79)   | -1.98 (-2.86) |
| DVU2364 | -         | aminotransferase, classes I and II                                     | -1.43 (-1.66) | 0.2 (0.22)    | -1.55 (-2.22) |
| DVU2370 | -         | outer membrane protein OmpH, putative                                  | 0.29 (0.31)   | 0.13 (0.12)   | 0.14 (0.26)   |
| DVU2373 | -         | outer membrane protein, OMP85 family                                   | -0.26 (-0.32) | -0.02 (-0.08) | -0.24 (-0.3)  |
| DVU2376 | lysS      | lysyl-tRNA synthetase                                                  | -1.67 (-1.93) | -0.93 (-1.28) | -0.81 (-1.14) |
| DVU2398 | -         | conserved hypothetical protein                                         | -0.09 (-0.13) | -0.9 (-1.24)  | 0.66 (1.02)   |
| DVU2399 | -         | hydrogenase, putative                                                  | 0.85 (0.96)   | 0.8 (1.01)    | 0.09 (0.19)   |
| DVU2400 | -         | hydrogenase, putative                                                  | 0.09 (0.09)   | 1.41 (1.81)   | -1.12 (-1.6)  |
| DVU2401 | -         | hydrogenase, iron-sulfur cluster-binding subunit, putative             | -0.55 (-0.65) | 0.64 (0.8)    | -1.08 (-1.54) |
| DVU2402 | hdrA      | heterodisulfide reductase, A subunit                                   | -1.35 (-1.57) | 0.06 (0.03)   | -1.34 (-1.92) |
| DVU2403 | hdrB      | heterodisulfide reductase, B subunit                                   | -0.07 (-0.1)  | 0.13 (0.12)   | -0.2 (-0.24)  |
| DVU2405 | -         | alcohol dehydrogenase, iron-containing                                 | 0.03 (0.01)   | 1.5 (1.94)    | -1.26 (-1.81) |
| DVU2410 | sodB      | superoxide dismutase, Fe                                               | 0.94 (1.06)   | 2.02 (2.62)   | -0.85 (-1.2)  |
| DVU2420 | -         | conserved hypothetical protein                                         | 0.44 (0.49)   | -0.44 (-0.64) | 0.78 (1.2)    |
| DVU2427 | -         | hypothetical protein                                                   | 0.91 (1.03)   | 0.99 (1.26)   | 0 (0.04)      |
| DVU2434 | -         | hypothetical protein                                                   | 1.39 (1.58)   | -0.29 (-0.43) | 1.54 (2.31)   |
| DVU2441 | hspC      | heat shock protein, Hsp20 family                                       | 0.38 (0.42)   | 1.63 (2.1)    | -1.05 (-1.49) |
| DVU2442 | -         | heat shock protein, Hsp20 family                                       | 0.5 (0.56)    | 2.3 (2.99)    | -1.5 (-2.15)  |
| DVU2444 | flaB3     | flagellin                                                              | 0.44 (0.49)   | 0.75 (0.94)   | -0.24 (-0.3)  |
| DVU2448 | panC      | pantoate--beta-alanine ligase                                          | -1.11 (-1.3)  | -0.48 (-0.69) | -0.64 (-0.9)  |
| DVU2449 | metK      | S-adenosylmethionine synthetase                                        | -1.88 (-2.18) | 0.05 (0.01)   | -1.82 (-2.63) |
| DVU2481 | fdoH      | formate dehydrogenase, beta subunit, putative                          | 1.52 (1.73)   | 1.36 (1.74)   | 0.25 (0.42)   |
| DVU2482 | fdnG-2    | formate dehydrogenase, alpha subunit, selenocysteine-containing        | 1.5 (1.71)    | 1.17 (1.5)    | 0.39 (0.62)   |
| DVU2483 | -         | cytochrome c family protein                                            | 0.29 (0.32)   | 0.52 (0.63)   | -0.18 (-0.22) |
| DVU2499 | ftsZ      | cell division protein FtsZ                                             | -0.98 (-1.14) | -1.36 (-1.85) | 0.23 (0.39)   |
| DVU2500 | ftsA      | cell division protein FtsA                                             | 0.14 (0.15)   | 0.14 (0.13)   | 0 (0.04)      |
| DVU2514 | pyk       | pyruvate kinase                                                        | -0.28 (-0.34) | 0.56 (0.69)   | -0.76 (-1.07) |
| DVU2515 | -         | HD domain protein                                                      | 0.51 (0.57)   | 0.39 (0.46)   | 0.1 (0.21)    |



|         |        |                                                        |               |               |               |
|---------|--------|--------------------------------------------------------|---------------|---------------|---------------|
| DVU2518 | rplM   | ribosomal protein L13                                  | -0.02 (-0.04) | -0.17 (-0.27) | 0.11 (0.21)   |
| DVU2519 | rpsI   | ribosomal protein S9                                   | 0.31 (0.34)   | 0.14 (0.13)   | 0.16 (0.29)   |
| DVU2529 | pgk    | phosphoglycerate kinase                                | -0.34 (-0.41) | -0.12 (-0.21) | -0.23 (-0.3)  |
| DVU2531 | rpe    | ribulose-phosphate 3-epimerase                         | 0.08 (0.07)   | 0.15 (0.14)   | -0.06 (-0.04) |
| DVU2535 | rplT   | ribosomal protein L20                                  | 1.01 (1.15)   | 0.47 (0.58)   | 0.52 (0.82)   |
| DVU2536 | rplM   | ribosomal protein L35                                  | 0.35 (0.38)   | -0.86 (-1.18) | 1.04 (1.59)   |
| DVU2537 | infC   | translation initiation factor IF-3                     | 0.13 (0.14)   | -0.91 (-1.25) | 0.88 (1.35)   |
| DVU2543 | b0873  | hybrid cluster protein                                 | 0.74 (0.83)   | 1.8 (2.33)    | -0.85 (-1.2)  |
| DVU2548 | acpD   | acyl carrier protein phosphodiesterase                 | 0.96 (1.09)   | 1.04 (1.32)   | 0 (0.05)      |
| DVU2552 | gltX-2 | glutamyl-tRNA synthetase                               | 0.59 (0.66)   | 0.49 (0.59)   | 0.12 (0.23)   |
| DVU2569 | slyD   | peptidyl-prolyl cis-trans isomerase, FKBP-type         | 0.45 (0.5)    | 0.16 (0.16)   | 0.27 (0.45)   |
| DVU2572 | feoA   | ferrous iron transport protein A                       | 0.39 (0.43)   | 0.5 (0.61)    | -0.07 (-0.05) |
| DVU2577 | -      | DNA-binding response regulator, LuxR family            | 0.58 (0.65)   | 0.5 (0.61)    | 0.1 (0.2)     |
| DVU2582 | -      | transcriptional regulator, TetR family                 | -0.04 (-0.06) | 0.03 (0)      | -0.08 (-0.07) |
| DVU2586 | -      | ABC transporter, ATP-binding protein                   | -0.98 (-1.15) | 0.1 (0.08)    | -1.03 (-1.47) |
| DVU2590 | -      | sensory box protein                                    | -2.38 (-2.75) | -1.81 (-2.44) | -0.71 (-0.99) |
| DVU2614 | -      | hypothetical protein                                   | -0.73 (-0.85) | -0.07 (-0.14) | -0.64 (-0.89) |
| DVU2643 | htpG   | heat shock protein HtpG                                | -0.84 (-0.99) | 0.37 (0.45)   | -1.13 (-1.61) |
| DVU2652 | -      | hypothetical protein                                   | 1.34 (1.52)   | -0.39 (-0.56) | 1.57 (2.36)   |
| DVU2662 | -      | conserved hypothetical protein                         | 0.73 (0.82)   | 0.47 (0.57)   | 0.26 (0.43)   |
| DVU2669 | -      | conserved domain protein                               | 0.98 (1.11)   | 0.29 (0.34)   | 0.65 (1)      |
| DVU2717 | -      | hypothetical protein                                   | -0.33 (-0.39) | -0.67 (-0.94) | 0.23 (0.4)    |
| DVU2754 | qor    | quinone oxidoreductase                                 | -0.66 (-0.77) | 0.68 (0.85)   | -1.22 (-1.74) |
| DVU2755 | -      | conserved hypothetical protein                         | -0.83 (-0.97) | -0.14 (-0.24) | -0.67 (-0.93) |
| DVU2770 | -      | response regulator                                     | 0.06 (0.05)   | -0.17 (-0.27) | 0.18 (0.32)   |
| DVU2771 | -      | conserved hypothetical protein                         | 0.38 (0.42)   | -0.48 (-0.68) | 0.75 (1.15)   |
| DVU2774 | -      | CBS domain protein/ACT domain protein                  | 0.91 (1.03)   | 0.64 (0.8)    | 0.29 (0.48)   |
| DVU2776 | dsrC   | dissimilatory sulfite reductase, gamma subunit         | 0.27 (0.3)    | -0.64 (-0.89) | 0.78 (1.21)   |
| DVU2781 | -      | hypothetical protein                                   | 2.3 (2.63)    | 0.35 (0.42)   | 1.83 (2.75)   |
| DVU2784 | lldD   | dehydrogenase, FMN-dependent family                    | 0.02 (0)      | 0.14 (0.14)   | -0.12 (-0.12) |
| DVU2787 | -      | conserved domain protein                               | -0.27 (-0.33) | -0.22 (-0.35) | -0.09 (-0.08) |
| DVU2837 | -      | conserved hypothetical protein                         | 0.36 (0.4)    | -0.04 (-0.1)  | 0.37 (0.59)   |
| DVU2892 | -      | conserved hypothetical protein                         | 0.62 (0.69)   | 0.44 (0.53)   | 0.2 (0.34)    |
| DVU2897 | -      | conserved hypothetical protein                         | 0.25 (0.27)   | 1.07 (1.37)   | -0.68 (-0.95) |
| DVU2902 | pyrC   | dihydroorotase                                         | 0.14 (0.14)   | 0 (-0.06)     | 0.12 (0.23)   |
| DVU2903 | pcnB2  | HD domain protein                                      | -0.76 (-0.89) | 0.52 (0.63)   | -1.17 (-1.67) |
| DVU2912 | rpmE   | ribosomal protein L31                                  | 0.22 (0.24)   | -0.58 (-0.82) | 0.69 (1.07)   |
| DVU2914 | prfA   | peptide chain release factor 1                         | -0.8 (-0.94)  | -0.76 (-1.06) | -0.12 (-0.13) |
| DVU2920 | tuf    | translation elongation factor Tu                       | -0.7 (-0.83)  | -0.48 (-0.68) | -0.26 (-0.33) |
| DVU2923 | nusG   | transcription antitermination protein NusG             | 0.02 (0.01)   | 0.23 (0.26)   | -0.19 (-0.23) |
| DVU2924 | rplK   | ribosomal protein L11                                  | 0.33 (0.36)   | -0.33 (-0.48) | 0.57 (0.9)    |
| DVU2925 | rplA   | ribosomal protein L1                                   | 0.32 (0.35)   | -0.43 (-0.62) | 0.65 (1.01)   |
| DVU2926 | rplJ   | ribosomal protein L10                                  | -0.35 (-0.42) | -0.97 (-1.33) | 0.47 (0.74)   |
| DVU2928 | rpoB   | DNA-directed RNA polymerase, beta subunit              | -0.86 (-1.01) | 0 (-0.05)     | -0.82 (-1.15) |
| DVU2929 | rpoC   | DNA-directed RNA polymerase, beta prime subunit        | -0.03 (-0.05) | 0.8 (1.01)    | -0.73 (-1.02) |
| DVU2930 | -      | hypothetical protein                                   | #VALUE!       | #VALUE!       | #VALUE!       |
| DVU2935 | gpm    | phosphoglycerate mutase                                | -0.55 (-0.65) | 0.01 (-0.03)  | -0.54 (-0.74) |
| DVU2938 | -      | conserved hypothetical protein                         | -0.55 (-0.66) | -0.49 (-0.7)  | -0.12 (-0.12) |
| DVU2943 | pyrE   | orotate phosphoribosyltransferase                      | 0.42 (0.46)   | 0.23 (0.25)   | 0.16 (0.29)   |
| DVU2951 | glnS   | glutaminyl-tRNA synthetase                             | 0.66 (0.74)   | 0.21 (0.23)   | 0.42 (0.67)   |
| DVU2966 | -      | response regulator                                     | -0.03 (-0.06) | 0.92 (1.17)   | -0.83 (-1.17) |
| DVU2973 | hup    | integration host factor, beta subunit                  | 0.3 (0.32)    | 1.11 (1.42)   | -0.7 (-0.98)  |
| DVU2976 | -      | conserved hypothetical protein                         | 0.54 (0.6)    | 0.78 (0.99)   | -0.17 (-0.21) |
| DVU2978 | -      | hydrolase, haloacid dehalogenase-like family           | 0.13 (0.13)   | -0.68 (-0.96) | 0.68 (1.06)   |
| DVU2981 | leuA   | 2-isopropylmalate synthase                             | -0.15 (-0.19) | -0.25 (-0.38) | 0.06 (0.14)   |
| DVU2982 | leuC   | 3-isopropylmalate dehydratase, large subunit, putative | 1.78 (2.03)   | 1.49 (1.92)   | 0.38 (0.61)   |
| DVU2985 | leuB   | 3-isopropylmalate dehydrogenase                        | -0.72 (-0.85) | -0.52 (-0.74) | -0.25 (-0.32) |
| DVU2990 | moeA   | molybdopterin biosynthesis MoeA protein                | -0.04 (-0.07) | 0.52 (0.64)   | -0.51 (-0.7)  |
| DVU3005 | rfbE   | aminotransferase, DegT/DnrJ/EryC1/StrS family          | -0.88 (-1.03) | -0.34 (-0.51) | -0.55 (-0.76) |
| DVU3025 | por    | pyruvate-ferredoxin oxidoreductase                     | -1.06 (-1.24) | -0.1 (-0.19)  | -0.92 (-1.31) |
| DVU3027 | glcD   | glycolate oxidase, subunit GlcD                        | -0.94 (-1.1)  | -1.8 (-2.43)  | 0.62 (0.97)   |

|         |        |                                                                        |               |               |               |
|---------|--------|------------------------------------------------------------------------|---------------|---------------|---------------|
| DVU3028 | -      | iron-sulfur cluster-binding protein                                    | 0.12 (0.12)   | 0.62 (0.76)   | -0.42 (-0.57) |
| DVU3029 | pta    | phosphate acetyltransferase                                            | -1.87 (-2.17) | -0.36 (-0.53) | -1.45 (-2.09) |
| DVU3030 | ackA   | acetate kinase                                                         | -0.54 (-0.64) | -0.36 (-0.53) | -0.21 (-0.26) |
| DVU3031 | -      | conserved hypothetical protein                                         | -0.9 (-1.05)  | 0.24 (0.26)   | -1.06 (-1.51) |
| DVU3032 | -      | conserved hypothetical protein                                         | 0.16 (0.17)   | -0.95 (-1.3)  | 0.94 (1.44)   |
| DVU3033 | -      | iron-sulfur cluster-binding protein                                    | -0.05 (-0.07) | 0.53 (0.65)   | -0.51 (-0.71) |
| DVU3037 | -      | rhodanese-like domain protein                                          | -0.33 (-0.4)  | 0 (-0.06)     | -0.33 (-0.44) |
| DVU3041 | -      | cytochrome c553                                                        | 1.1 (1.25)    | 1.16 (1.49)   | 0.02 (0.09)   |
| DVU3048 | asd    | aspartate-semialdehyde dehydrogenase                                   | 0.35 (0.39)   | 0.66 (0.83)   | -0.24 (-0.31) |
| DVU3053 | -      | conserved hypothetical protein                                         | 0.08 (0.07)   | 0.06 (0.03)   | 0 (0.05)      |
| DVU3066 | -      | DNA-binding protein                                                    | -1.12 (-1.3)  | -0.97 (-1.33) | -0.25 (-0.32) |
| DVU3080 | -      | transcriptional regulator, putative                                    | 0.02 (0)      | 0.07 (0.04)   | -0.05 (-0.03) |
| DVU3084 | -      | transcriptional regulator, putative                                    | -0.24 (-0.29) | -1.14 (-1.56) | 0.72 (1.11)   |
| DVU3094 | rbr    | rubrerythrin                                                           | 0.9 (1.02)    | -0.23 (-0.35) | 1.02 (1.56)   |
| DVU3103 | -      | tolB protein, putative                                                 | 0.02 (0.01)   | 0.31 (0.37)   | -0.25 (-0.32) |
| DVU3104 | pal    | peptidoglycan-associated lipoprotein, putative                         | 0.38 (0.42)   | 0.91 (1.15)   | -0.42 (-0.57) |
| DVU3117 | -      | hypothetical protein                                                   | 1.16 (1.32)   | 1.13 (1.45)   | 0.11 (0.21)   |
| DVU3118 | -      | conserved hypothetical protein                                         | -0.39 (-0.46) | -0.26 (-0.4)  | -0.16 (-0.18) |
| DVU3136 | -      | nitroreductase family protein                                          | -0.42 (-0.5)  | 0.38 (0.46)   | -0.73 (-1.02) |
| DVU3150 | rpsA   | ribosomal protein S1                                                   | 0.27 (0.29)   | -0.06 (-0.13) | 0.29 (0.47)   |
| DVU3154 | -      | HAM1 family protein                                                    | -0.24 (-0.3)  | -0.5 (-0.71)  | 0.17 (0.31)   |
| DVU3162 | -      | ABC transporter, periplasmic substrate-binding protein                 | -0.21 (-0.25) | -0.02 (-0.07) | -0.19 (-0.23) |
| DVU3167 | -      | heme biosynthesis protein, putative                                    | 0.22 (0.24)   | -0.22 (-0.34) | 0.38 (0.61)   |
| DVU3168 | hemL   | glutamate-1-semialdehyde-2,1-aminomutase                               | -0.94 (-1.09) | -0.08 (-0.16) | -0.82 (-1.15) |
| DVU3172 | -      | hypothetical protein                                                   | 1.21 (1.38)   | 0.95 (1.21)   | 0.31 (0.51)   |
| DVU3173 | -      | hypothetical protein                                                   | 0.57 (0.64)   | 0.02 (-0.01)  | 0.5 (0.79)    |
| DVU3183 | rbO    | desulferodoxin                                                         | -0.11 (-0.14) | -0.29 (-0.44) | 0.13 (0.24)   |
| DVU3185 | roO    | rubredoxin-oxygen oxidoreductase                                       | 0.43 (0.48)   | -0.5 (-0.72)  | 0.82 (1.26)   |
| DVU3187 | hup-4  | DNA-binding protein HU                                                 | 0.96 (1.08)   | 0.63 (0.78)   | 0.34 (0.56)   |
| DVU3190 | -      | hypothetical protein                                                   | 0.1 (0.1)     | -0.06 (-0.13) | 0.13 (0.25)   |
| DVU3193 | -      | DNA-binding domain, excisionase family                                 | 1.03 (1.17)   | 0.62 (0.77)   | 0.42 (0.68)   |
| DVU3194 | engA   | GTP-binding protein EngA                                               | -1.56 (-1.81) | 0.11 (0.09)   | -1.57 (-2.26) |
| DVU3197 | ilvE   | branched-chain amino acid aminotransferase                             | 0.28 (0.31)   | 0.1 (0.08)    | 0.16 (0.28)   |
| DVU3199 | -      | conserved hypothetical protein TIGR00103                               | 0.19 (0.2)    | -0.4 (-0.58)  | 0.5 (0.79)    |
| DVU3204 | purA   | adenylosuccinate synthetase                                            | -1.13 (-1.31) | -0.73 (-1.02) | -0.44 (-0.6)  |
| DVU3206 | purH   | phosphoribosylaminoimidazolecarboxamide formyltransferase, putative    | -0.05 (-0.08) | -0.46 (-0.66) | 0.32 (0.53)   |
| DVU3212 | nox    | pyridine nucleotide-disulfide oxidoreductase                           | -0.2 (-0.25)  | -0.68 (-0.95) | 0.37 (0.59)   |
| DVU3228 | cheY-3 | chemotaxis protein CheY                                                | -1.14 (-1.33) | -0.29 (-0.44) | -0.85 (-1.2)  |
| DVU3235 | purH   | IMP cyclohydrolase, putative                                           | 0.2 (0.21)    | 0.02 (-0.02)  | 0.15 (0.27)   |
| DVU3242 | rpoZ   | DNA-directed RNA polymerase, omega subunit                             | 0.79 (0.9)    | -0.11 (-0.2)  | 0.83 (1.27)   |
| DVU3245 | greA   | transcription elongation factor GreA                                   | 1.52 (1.73)   | 0.64 (0.79)   | 0.86 (1.32)   |
| DVU3253 | -      | phenylacetate-coenzyme A ligase, putative                              | 0.49 (0.55)   | 0.97 (1.23)   | -0.38 (-0.51) |
| DVU3263 | frdB   | fumarate reductase, iron-sulfur protein                                | -0.66 (-0.78) | 0.34 (0.4)    | -0.95 (-1.34) |
| DVU3271 | cydA   | cytochrome d ubiquinol oxidase, subunit I                              | -0.51 (-0.61) | -0.24 (-0.37) | -0.29 (-0.38) |
| DVU3272 | -      | TPR domain protein                                                     | -0.37 (-0.45) | -0.98 (-1.35) | 0.47 (0.74)   |
| DVU3278 | htrA   | peptidase/PDZ domain protein                                           | -0.95 (-1.11) | 0.05 (0.02)   | -0.95 (-1.35) |
| DVU3281 | -      | hypothetical protein                                                   | -1.16 (-1.35) | -1.35 (-1.84) | 0.04 (0.12)   |
| DVU3282 | -      | ADP-ribosylglycohydrolase family protein                               | 1.03 (1.17)   | 1.32 (1.7)    | -0.17 (-0.2)  |
| DVU3294 | areC   | aldehyde dehydrogenase NADP family protein                             | -0.18 (-0.23) | 0.11 (0.09)   | -0.28 (-0.36) |
| DVU3319 | putA   | proline dehydrogenase/delta-1-pyrroline-5-carboxylate dehydrogenase    | -1.05 (-1.22) | 0.05 (0.01)   | -1.04 (-1.49) |
| DVU3347 | -      | pyruvate ferredoxin/ferredoxin oxidoreductase family protein           | 0.01 (0)      | 0.07 (0.05)   | -0.06 (-0.03) |
| DVU3348 | -      | pyruvate ferredoxin/ferredoxin oxidoreductase, beta subunit, putative  | -1.47 (-1.71) | -1.4 (-1.9)   | -0.2 (-0.24)  |
| DVU3349 | -      | pyruvate flavodoxin/ferredoxin oxidoreductase, thiamine diP-binding    | 0.01 (0)      | 0.28 (0.32)   | -0.23 (-0.29) |
| DVU3352 | -      | lipoprotein, putative                                                  | 0.08 (0.07)   | 0.16 (0.16)   | -0.08 (-0.07) |
| DVU3360 | parB   | ParB family protein                                                    | 1.42 (1.61)   | 0.82 (1.04)   | 0.61 (0.95)   |
| DVU3371 | metE   | 5-methyltetrahydropteroyltriglutamate-homocysteine S-methyltransferase | -2.83 (-3.27) | 0.94 (1.19)   | -3.5 (-5.1)   |
| DVU3373 | ilvD   | dihydroxy-acid dehydratase                                             | -1.51 (-1.76) | 0.11 (0.09)   | -1.53 (-2.2)  |

|          |      |                                    |               |               |               |
|----------|------|------------------------------------|---------------|---------------|---------------|
| DVU3384  | zraP | zinc resistance-associated protein | 1.24 (1.41)   | 0.21 (0.22)   | 0.97 (1.48)   |
| DVUA0002 | -    | -                                  | 0.08 (0.08)   | -0.16 (-0.26) | 0.2 (0.34)    |
| DVUA0020 | -    | -                                  | 0.97 (1.1)    | -1.13 (-1.55) | 1.86 (2.79)   |
| DVUA0074 | -    | -                                  | 0.05 (0.05)   | -0.54 (-0.76) | 0.5 (0.78)    |
| DVUA0091 | -    | -                                  | 1.06 (1.21)   | 1.29 (1.66)   | -0.11 (-0.12) |
| DVUA0108 | -    | -                                  | 1.87 (2.13)   | 1.17 (1.49)   | 0.74 (1.14)   |
| DVUA0109 | -    | -                                  | -0.02 (-0.04) | -0.16 (-0.27) | 0.1 (0.2)     |
| DVUA0111 | -    | -                                  | 0.02 (0.01)   | -0.16 (-0.27) | 0.16 (0.29)   |
| DVUA0114 | -    | -                                  | 0.13 (0.13)   | 0.23 (0.25)   | -0.08 (-0.07) |
| DVUA0115 | -    | -                                  | 1.39 (1.58)   | 1.81 (2.34)   | -0.25 (-0.32) |
| DVUA0116 | -    | -                                  | 0.17 (0.18)   | -0.11 (-0.19) | 0.24 (0.41)   |
| DVUA0126 | -    | -                                  | -0.98 (-1.14) | -0.88 (-1.21) | -0.24 (-0.3)  |
| DVUA0132 | -    | -                                  | 0.21 (0.23)   | -0.19 (-0.31) | 0.35 (0.57)   |
| DVUA0146 | -    | -                                  | -0.04 (-0.07) | -0.1 (-0.18)  | 0.03 (0.09)   |
