# Supplementary material for: Transcriptomic and proteomic analyses of Desulfovibrio vulgaris biofilms: Carbon and energy flow contribute to the distinct biofilm growth state
Source: PubMed Central journal article supplement (PMC3431258; doi:10.1186/1471-2164-13-138), 2012-04-16
Supplement: 1471-2164-13-138-S6.pdf [file 1471-2164-13-138-S6.pdf]

**Additional file 6.** Expression and z values for 15 ribosomal protein genes. Expo1 and Expo2 represent exponential-phase cells and Stat1 through Stat4 represent stationary-phase cells. Blue and red colors denote level of expression for genes with a significant z score for up- and down-expression, respectively.

| ORF #   | Gene          | Expo1              | Expo2            | Transition         | Stat1              | Stat2              | Stat3              | Stat4              | Biofilm            |
|---------|---------------|--------------------|------------------|--------------------|--------------------|--------------------|--------------------|--------------------|--------------------|
| DVU1896 | <i>rpsT</i>   | 0.72<br>z = 1.19   | 0.09<br>z = 0.15 | -4.26<br>z = -4.29 | -3.86<br>z = -3.74 | -3.75<br>z = -3.60 | -4.15<br>z = -4.74 | -3.22<br>z = -4.81 | -0.83<br>z = -1.29 |
| DVU0014 | <i>infA-1</i> | 0.48<br>z = 0.84   | 0.35<br>z = 0.62 | -3.97<br>z = -4.09 | -3.63<br>z = -4.22 | -3.39<br>z = -5.43 | -3.23<br>z = -4.42 | -3.55<br>z = -5.29 | -2.55<br>z = -3.92 |
| DVU1574 | <i>rplY</i>   | 1.32<br>z = 2.29   | 1.20<br>z = 2.17 | -3.12<br>z = -3.02 | -2.11<br>z = -2.38 | -2.38<br>z = -2.11 | -2.19<br>z = -3.00 | -2.36<br>z = -3.58 | -1.65<br>z = -2.54 |
| DVU0928 | <i>rpmA</i>   | 0.83<br>z = 1.38   | 0.82<br>z = 1.41 | -2.93<br>z = -3.26 | -2.76<br>z = -3.09 | -2.85<br>z = -2.62 | -2.10<br>z = -3.21 | -2.36<br>z = -4.01 | -1.01<br>z = -1.82 |
| DVU2912 | <i>rpmE</i>   | 0.59<br>z = 1.04   | NA               | -2.90<br>z = -3.70 | -2.20<br>z = -2.82 | -2.38<br>z = -3.94 | -2.06<br>z = -3.68 | -2.07<br>z = -2.74 | NA                 |
| DVU0957 | <i>rpsR</i>   | 1.63<br>z = 2.62   | 1.08<br>z = 1.96 | -2.82<br>z = -2.63 | -1.72<br>z = -1.60 | -2.05<br>z = -2.16 | -1.90<br>z = -2.13 | -2.32<br>z = -3.06 | -0.88<br>z = -1.56 |
| DVU1211 | <i>rpmB</i>   | -0.37<br>z = -0.64 | 0.12<br>z = 0.10 | -2.43<br>z = -2.66 | -1.28<br>z = -1.86 | -1.31<br>z = -1.95 | -1.02<br>z = -1.62 | -1.42<br>z = -2.48 | -0.16<br>z = -0.17 |
| DVU2926 | <i>rplJ</i>   | 1.77<br>z = 2.79   | 1.27<br>z = 2.04 | -2.75<br>z = -3.27 | -1.51<br>z = -1.78 | -1.64<br>z = -1.76 | -1.92<br>z = -2.07 | -2.34<br>z = -3.04 | NA                 |
| DVU1328 | <i>rpsD</i>   | 1.39<br>z = 2.33   | 0.85<br>z = 1.43 | -2.43<br>z = -2.66 | -1.28<br>z = -1.86 | -1.31<br>z = -1.95 | -1.02<br>z = -1.62 | -1.42<br>z = -2.48 | -1.17<br>z = -1.99 |
| DVU1299 | <i>rpsG</i>   | 1.12<br>z = 1.89   | 0.68<br>z = 1.21 | -2.40<br>z = -3.28 | -1.40<br>z = -2.23 | -1.23<br>z = -1.69 | -1.29<br>z = -1.80 | -1.18<br>z = -1.86 | -1.69<br>z = -2.58 |
| DVU0839 | <i>rpsP</i>   | 0.68<br>z = 1.07   | 0.59<br>z = 0.82 | -2.39<br>z = -3.16 | -1.93<br>z = -2.89 | -2.04<br>z = -3.10 | -2.03<br>z = -3.25 | -2.12<br>z = -3.03 | 0.15<br>z = 0.28   |
| DVU1303 | <i>rplC</i>   | 1.53<br>z = 2.60   | 0.89<br>z = 1.41 | -2.34<br>z = -3.59 | -1.15<br>z = -1.46 | -1.65<br>z = -2.45 | -1.13<br>z = -1.49 | -1.81<br>z = -3.08 | -0.75<br>z = -1.20 |
| DVU1315 | <i>rplE</i>   | 1.08<br>z = 1.55   | 0.24<br>z = 0.31 | -2.31<br>z = -2.78 | -2.48<br>z = -3.02 | -1.23<br>z = -1.72 | -1.24<br>z = -1.51 | -1.75<br>z = -2.45 | -0.07<br>z = -0.13 |
| DVU1326 | <i>rpsM</i>   | 1.09<br>z = 1.84   | 0.71<br>z = 1.20 | -2.30<br>z = -3.36 | -1.67<br>z = -1.89 | -1.58<br>z = -2.24 | -1.35<br>z = -2.39 | -2.03<br>z = -3.46 | -0.89<br>z = -1.57 |
| DVU1792 | <i>rpsU</i>   | 0.85               | NA               | -2.21              | -1.84              | -1.91              | -2.26              | -1.90              | -0.73              |

|  |  |            |  |             |             |             |             |             |             |
|--|--|------------|--|-------------|-------------|-------------|-------------|-------------|-------------|
|  |  | $z = 1.43$ |  | $z = -1.97$ | $z = -2.28$ | $z = -2.26$ | $z = -2.79$ | $z = -2.27$ | $z = -1.36$ |
|--|--|------------|--|-------------|-------------|-------------|-------------|-------------|-------------|
