# Supplementary material for: Transcriptomic and proteomic analyses of Desulfovibrio vulgaris biofilms: Carbon and energy flow contribute to the distinct biofilm growth state
Source: PubMed Central journal article supplement (PMC3431258; doi:10.1186/1471-2164-13-138), 2012-04-16
Supplement: 1471-2164-13-138-S7.pdf [file 1471-2164-13-138-S7.pdf]

**Additional file 7.** Analysis of enriched extracellular proteins from biofilms.

| DVU     | Gene Name | description                                                                                | TM | Signal | Abundance (%) | # Pep Obs | # Pep Est. | Diff. |
|---------|-----------|--------------------------------------------------------------------------------------------|----|--------|---------------|-----------|------------|-------|
| DVU1012 | -         | hemolysin-type calcium-binding repeat protein                                              | 0  | 0      | 0.328         | 67        | 8          | 59    |
| DVU0547 | -         | high-affinity branched chain amino acid ABC transporter                                    | 0  | Y      | 0.343         | 26        | 8          | 18    |
| DVU0169 | -         | oligopeptide/dipeptide ABC transporter, periplasmic oligopeptide/dipeptide-binding protein | 0  | Y      | 0.532         | 27        | 13         | 14    |
| DVU1918 | hysA      | periplasmic [NiFeSe] hydrogenase, large subunit, selenocysteine-containing                 | 0  | 0      | 0.125         | 16        | 3          | 13    |
| DVU0797 | -         | conserved hypothetical protein                                                             | 0  | Y      | 0.139         | 16        | 3          | 13    |
| DVU0386 | glnH      | amino acid ABC transporter                                                                 | 0  | Y      | 0.160         | 16        | 4          | 12    |
| DVU1545 | -         | hemolysin-type calcium-binding repeat/calx-beta domain protein                             | 0  | 0      | 0.000         | 12        | 0          | 12    |
| Keratin | -         | -                                                                                          | -  | -      | 0.000         | 11        | 0          | 11    |
| DVU0712 | -         | amino acid ABC transporter, periplasmic-binding protein                                    | 0  | Y      | 0.428         | 21        | 10         | 11    |
| DVU2013 | -         | hybrid cluster protein                                                                     | 0  | 0      | 0.518         | 23        | 13         | 10    |
| DVU1937 | -         | phosphonate ABC transporter, periplasmic phosphonate-binding                               | 0  | Y      | 0.213         | 15        | 5          | 10    |
| DVU1655 | aspC4     | aminotransferase, classes I and II                                                         | 0  | 0      | 0.234         | 15        | 6          | 9     |
| DVU3030 | ackA      | acetate kinase                                                                             | 0  | 0      | 0.653         | 25        | 16         | 9     |
| DVU1064 | aco       | aconitate hydratase, putative                                                              | 0  | 0      | 0.182         | 13        | 4          | 9     |
| DVU1013 | -         | type I secretion outer membrane protein, TolC family                                       | 0  | Y      | 0.105         | 11        | 3          | 8     |
| DVU2985 | leuB      | 3-isopropylmalate dehydrogenase                                                            | 0  | 0      | 0.131         | 11        | 3          | 8     |
| DVU2966 | -         | response regulator                                                                         | 0  | 0      | 0.059         | 9         | 1          | 8     |
| DVU0319 | -         | NAD-dependent epimerase/dehydratase family protein                                         | 0  | 0      | 0.148         | 11        | 4          | 7     |
| DVU0752 | -         | amino acid ABC transporter                                                                 | 0  | Y      | 0.114         | 10        | 3          | 7     |
| DVU1873 | ppiB-2    | peptidyl-prolyl cis-trans isomerase B                                                      | 0  | 0      | 0.080         | 9         | 2          | 7     |
| DVU1443 | flgE      | flagellar hook protein FlgE                                                                | 0  | Y      | 0.006         | 7         | 0          | 7     |
| DVU0761 | -         | lipoprotein, putative                                                                      | 0  | Y      | 0.048         | 8         | 1          | 7     |
| DVU0095 | potD-1    | polyamine ABC transporter                                                                  | 0  | Y      | 0.132         | 10        | 3          | 7     |
| DVU1204 | fabF      | 3-oxoacyl-acyl-carrier-protein synthase II                                                 | 0  | 0      | 0.100         | 9         | 2          | 7     |
| DVU3212 | nox       | pyridine nucleotide-disulfide oxidoreductase                                               | 0  | Y      | 0.318         | 14        | 8          | 6     |
| DVU2543 | b0873     | hybrid cluster protein                                                                     | 0  | 0      | 0.319         | 14        | 8          | 6     |
| DVU0799 | -         | conserved hypothetical protein                                                             | 0  | Y      | 0.280         | 13        | 7          | 6     |
| DVU1441 | flaB1     | flagellin                                                                                  | 0  | 0      | 0.038         | 7         | 1          | 6     |
| DVU0487 | purE      | phosphoribosylaminoimidazole carboxylase, catalytic subunit                                | 0  | 0      | 0.086         | 8         | 2          | 6     |
| DVU0979 | b1200     | DAK1 domain protein                                                                        | 0  | 0      | 0.335         | 14        | 8          | 6     |
| DVU0863 | -         | flagellar hook-associated protein 2                                                        | 0  | 0      | 0.005         | 6         | 0          | 6     |
| DVU1817 | cyf       | cytochrome c-553                                                                           | 0  | Y      | 0.097         | 8         | 2          | 6     |
| DVU0671 | -         | conserved hypothetical protein                                                             | 0  | 0      | 0.388         | 15        | 9          | 6     |
| DVU1260 | -         | outer membrane protein P1, putative                                                        | 0  | Y      | 0.000         | 5         | 0          | 5     |
| DVU1238 | -         | amino acid ABC transporter                                                                 | 0  | Y      | 0.336         | 13        | 8          | 5     |

|         |        |                                                                     |   |   |       |    |    |   |
|---------|--------|---------------------------------------------------------------------|---|---|-------|----|----|---|
| DVU0353 | -      | alcohol dehydrogenase, iron-containing                              | 0 | 0 | 0.133 | 8  | 3  | 5 |
| DVU0107 | glnH   | glutamine ABC transporter                                           | 0 | Y | 0.218 | 10 | 5  | 5 |
| DVU2697 | -      | hypothetical protein                                                | 0 | Y | 0.015 | 5  | 0  | 5 |
| DVU2477 | pstS   | phosphate ABC transporter                                           | 0 | Y | 0.015 | 5  | 0  | 5 |
| DVU0341 | kdsB   | 3-deoxy-D-manno-octulosonate cytidyltransferase                     | 0 | 0 | 0.100 | 7  | 2  | 5 |
| DVU0745 | -      | ABC transporter                                                     | 0 | Y | 0.019 | 5  | 0  | 5 |
| DVU0002 | dnaN   | DNA polymerase III, beta subunit                                    | 0 | 0 | 0.106 | 7  | 3  | 4 |
| DVU1427 | -      | response regulator                                                  | 0 | 0 | 0.024 | 5  | 1  | 4 |
| Trypsin | -      | -                                                                   | - | - | 0.000 | 4  | 0  | 4 |
| DVU0575 | -      | hypothetical protein                                                | 0 | Y | 0.000 | 4  | 0  | 4 |
| DVU0966 | -      | amino acid ABC transporter                                          | 0 | Y | 0.168 | 8  | 4  | 4 |
| DVU0978 | -      | ABC transporter                                                     | 0 | Y | 0.010 | 4  | 0  | 4 |
| DVU3041 | -      | cytochrome c553                                                     | 0 | Y | 0.018 | 4  | 0  | 4 |
| DVU3183 | rbO    | desulfoferrodoxin                                                   | 0 | 0 | 0.143 | 7  | 3  | 4 |
| DVU0296 | -      | peptidase, M24 family                                               | 0 | 0 | 0.061 | 5  | 1  | 4 |
| DVU0595 | -      | conserved hypothetical protein                                      | 0 | 0 | 0.021 | 4  | 1  | 3 |
| DVU3048 | asd    | aspartate-semialdehyde dehydrogenase                                | 0 | Y | 0.192 | 8  | 5  | 3 |
| DVU0460 | -      | predicted phospho-2-dehydro-3-deoxyheptonate aldolase               | 0 | 0 | 0.277 | 10 | 7  | 3 |
| DVU0339 | serA   | D-isomer specific 2-hydroxyacid dehydrogenase family protein        | 0 | 0 | 0.114 | 6  | 3  | 3 |
| DVU2201 | b3011  | alcohol dehydrogenase, iron-containing                              | 0 | 0 | 0.322 | 11 | 8  | 3 |
| DVU2318 | rbr2   | rubrerythrin, putative                                              | 0 | 0 | 0.074 | 5  | 2  | 3 |
| DVU0439 | -      | YCII-related domain protein                                         | 0 | 0 | 0.000 | 3  | 0  | 3 |
| DVU3171 | -      | cytochrome c3                                                       | 0 | Y | 0.000 | 3  | 0  | 3 |
| DVU2680 | fld    | flavodoxin, iron-repressed                                          | 0 | 0 | 0.000 | 3  | 0  | 3 |
| DVU1619 | gpmA   | phosphoglycerate mutase, 2,3-bisphosphoglycerate-independent        | 0 | 0 | 0.000 | 3  | 0  | 3 |
| DVU1423 | lpdA   | 2-oxoglutarate dehydrogenase, E3 component, lipoamide dehydrogenase | 0 | 0 | 0.000 | 3  | 0  | 3 |
| DVU0477 | icd    | isocitrate dehydrogenase, NADP-dependent                            | 0 | 0 | 0.127 | 6  | 3  | 3 |
| DVU3042 | -      | lipoprotein, putative                                               | 0 | Y | 0.005 | 3  | 0  | 3 |
| DVU2496 | -      | lipoprotein, putative                                               | 0 | Y | 0.007 | 3  | 0  | 3 |
| DVU2942 | purB   | adenylosuccinate lyase                                              | 0 | 0 | 0.090 | 5  | 2  | 3 |
| DVU1833 | ppsA   | phosphoenolpyruvate synthase, putative                              | 0 | 0 | 0.629 | 18 | 15 | 3 |
| DVU2744 | -      | high-affinity branched-chain amino acid ABC transporter             | 0 | Y | 0.012 | 3  | 0  | 3 |
| DVU3118 | -      | conserved hypothetical protein                                      | 0 | 0 | 0.055 | 4  | 1  | 3 |
| DVU1317 | rpsH   | ribosomal protein S8                                                | 0 | 0 | 0.180 | 7  | 4  | 3 |
| DVU2449 | metK   | S-adenosylmethionine synthetase                                     | 0 | 0 | 0.469 | 14 | 11 | 3 |
| DVU1586 | ccmG   | thioredoxin family protein                                          | 0 | Y | 0.015 | 3  | 0  | 3 |
| DVU0766 | -      | transporter, putative                                               | 0 | Y | 0.022 | 3  | 1  | 2 |
| DVU1621 | -      | hypothetical protein                                                | 0 | 0 | 0.023 | 3  | 1  | 2 |
| DVU2077 | -      | conserved hypothetical protein                                      | 0 | 0 | 0.232 | 8  | 6  | 2 |
| DVU0675 | fliY   | amino acid ABC transporter, periplasmic amino acid-binding protein  | 0 | Y | 0.115 | 5  | 3  | 2 |
| DVU1612 | -      | ACT domain protein                                                  | 0 | 0 | 0.076 | 4  | 2  | 2 |
| DVU0660 | -      | phosphoesterase, putative                                           | 0 | 0 | 0.035 | 3  | 1  | 2 |
| DVU0284 | ppiB-1 | peptidyl-prolyl cis-trans isomerase B                               | 0 | 0 | 0.036 | 3  | 1  | 2 |
| DVU2569 | slyD   | peptidyl-prolyl cis-trans isomerase, FKBP-type                      | 0 | 0 | 0.119 | 5  | 3  | 2 |

|         |        |                                                                    |   |   |       |    |    |   |
|---------|--------|--------------------------------------------------------------------|---|---|-------|----|----|---|
| DVU2250 | -      | AMP-binding protein                                                | 0 | 0 | 0.163 | 6  | 4  | 2 |
| DVU0277 | -      | transcriptional regulator, AraC family                             | 0 | 0 | 0.000 | 2  | 0  | 2 |
| DVU0074 | -      | polysaccharide biosynthesis domain protein                         | 0 | 0 | 0.000 | 2  | 0  | 2 |
| DVU1205 | acpP   | acyl carrier protein                                               | 0 | 0 | 0.042 | 3  | 1  | 2 |
| DVU1319 | rplR   | ribosomal protein L18                                              | 0 | 0 | 0.044 | 3  | 1  | 2 |
| DVU0255 | -      | hypothetical protein                                               | 1 | 0 | 0.003 | 2  | 0  | 2 |
| DVU1933 | -      | peptidase, Pfpl family                                             | 0 | 0 | 0.003 | 2  | 0  | 2 |
| DVU1307 | rpsS   | ribosomal protein S19                                              | 0 | 0 | 0.046 | 3  | 1  | 2 |
| DVU2333 | ndk    | nucleoside diphosphate kinase                                      | 0 | 0 | 0.005 | 2  | 0  | 2 |
| DVU1684 | gcvT   | glycine cleavage system T protein                                  | 0 | 0 | 0.047 | 3  | 1  | 2 |
| DVU0305 | fd II  | ferredoxin II                                                      | 0 | 0 | 0.006 | 2  | 0  | 2 |
| DVU3228 | cheY-3 | chemotaxis protein CheY                                            | 0 | 0 | 0.006 | 2  | 0  | 2 |
| DVU2223 | -      | hypothetical protein                                               | 0 | 0 | 0.006 | 2  | 0  | 2 |
| DVU2112 | -      | hypothetical protein                                               | 0 | 0 | 0.006 | 2  | 0  | 2 |
| DVU1878 | ltaE   | threonine aldolase, low-specificity                                | 0 | 0 | 0.048 | 3  | 1  | 2 |
| DVU1198 | ribH   | riboflavin synthase, beta subunit                                  | 0 | 0 | 0.173 | 6  | 4  | 2 |
| DVU2428 | -      | lipoprotein, putative                                              | 0 | Y | 0.011 | 2  | 0  | 2 |
| DVU0488 | purD   | phosphoribosylamine--glycine ligase                                | 0 | 0 | 0.180 | 6  | 4  | 2 |
| DVU2444 | flaB3  | flagellin                                                          | 0 | 0 | 0.058 | 3  | 1  | 2 |
| DVU0607 | ahcY   | adenosylhomocysteinase                                             | 0 | 0 | 0.678 | 18 | 16 | 2 |
| DVU0352 | lpsC   | aminotransferase, DegT/DnrJ/EryC1/StrS family                      | 0 | 0 | 0.024 | 2  | 1  | 1 |
| DVU0278 | -      | glyoxalase family protein                                          | 0 | Y | 0.025 | 2  | 1  | 1 |
| DVU0401 | -      | hypothetical protein                                               | 0 | 0 | 0.030 | 2  | 1  | 1 |
| DVU3168 | hemL   | glutamate-1-semialdehyde-2,1-aminomutase                           | 0 | 0 | 0.114 | 4  | 3  | 1 |
| DVU1980 | -      | hypothetical protein                                               | 1 | 0 | 0.034 | 2  | 1  | 1 |
| DVU1580 | rpiB   | ribose 5-phosphate isomerase, putative                             | 0 | 0 | 0.036 | 2  | 1  | 1 |
| DVU1308 | rplV   | ribosomal protein L22                                              | 0 | 0 | 0.037 | 2  | 1  | 1 |
| DVU1298 | rpsL   | ribosomal protein S12                                              | 0 | 0 | 0.037 | 2  | 1  | 1 |
| DVU2342 | -      | amino acid ABC transporter, periplasmic amino acid-binding protein | 0 | Y | 0.162 | 5  | 4  | 1 |
| DVU1579 | cysS   | cysteinyl-tRNA synthetase                                          | 0 | 0 | 0.120 | 4  | 3  | 1 |
| DVU3049 | -      | hemerythrin family protein                                         | 0 | 0 | 0.080 | 3  | 2  | 1 |
| DVU2530 | tkt    | transketolase                                                      | 0 | 0 | 0.122 | 4  | 3  | 1 |
| DVU0835 | rplS   | ribosomal protein L19                                              | 0 | 0 | 0.049 | 2  | 1  | 1 |
| DVU1207 | fabH   | 3-oxoacyl-acyl-carrier-protein synthase III                        | 0 | 0 | 0.049 | 2  | 1  | 1 |
| DVU2144 | gap-2  | glyceraldehyde 3-phosphate dehydrogenase                           | 0 | 0 | 0.092 | 3  | 2  | 1 |
| DVU0007 | asnS   | asparaginyl-tRNA synthetase                                        | 0 | 0 | 0.216 | 6  | 5  | 1 |
| DVU1677 | tpiA   | triosephosphate isomerase                                          | 0 | 0 | 0.093 | 3  | 2  | 1 |
| DVU0138 | -      | response regulator                                                 | 0 | 0 | 0.094 | 3  | 2  | 1 |
| DVU2529 | pgk    | phosphoglycerate kinase                                            | 0 | 0 | 0.179 | 5  | 4  | 1 |
| DVU0839 | rpsP   | ribosomal protein S16                                              | 0 | 0 | 0.056 | 2  | 1  | 1 |
| DVU1311 | rpmC   | ribosomal protein L29                                              | 0 | 0 | 0.098 | 3  | 2  | 1 |
| DVU1827 | -      | acetylornithine deacetylase/succinyl-diaminopimelate desuccinylase | 0 | 0 | 0.058 | 2  | 1  | 1 |
| DVU1924 | hypC   | hydrogenase assembly chaperone hypC/hupF                           | 0 | 0 | 0.063 | 2  | 2  | 0 |
| DVU3392 | glnA   | glutamine synthetase, type I                                       | 0 | 0 | 0.147 | 4  | 4  | 0 |
| DVU2784 | lldD   | dehydrogenase, FMN-dependent family                                | 0 | 0 | 0.194 | 5  | 5  | 0 |
| DVU1839 | trx    | thioredoxin                                                        | 0 | 0 | 0.279 | 7  | 7  | 0 |

|         |        |                                                          |   |   |       |    |    |    |
|---------|--------|----------------------------------------------------------|---|---|-------|----|----|----|
| DVU2108 | -      | MTH1175-like domain family                               | 0 | 0 | 0.202 | 5  | 5  | 0  |
| DVU0241 | -      | MTH1175-like domain family                               | 0 | 0 | 0.085 | 2  | 2  | 0  |
| DVU0418 | lys1   | saccharopine dehydrogenase                               | 0 | Y | 0.087 | 2  | 2  | 0  |
| DVU1539 | glpX   | fructose-1,6-bisphosphatase, class II                    | 0 | 0 | 0.129 | 3  | 3  | 0  |
| DVU3384 | zraP   | zinc resistance-associated protein                       | 0 | Y | 0.336 | 8  | 8  | 0  |
| DVU2983 | leuD   | 3-isopropylmalate dehydratase, small subunit             | 0 | 0 | 0.131 | 3  | 3  | 0  |
| DVU2347 | argD   | acetylornithine aminotransferase                         | 0 | 0 | 0.258 | 6  | 6  | 0  |
| DVU0795 | purC   | phosphoribosylaminoimidazole-succinocarboxamide synthase | 0 | 0 | 0.135 | 3  | 3  | 0  |
| DVU1568 | ftn    | ferritin                                                 | 0 | 0 | 0.302 | 7  | 7  | 0  |
| DVU1904 | cheW-2 | chemotaxis protein CheW                                  | 0 | 0 | 0.179 | 4  | 4  | 0  |
| DVU1228 | tpX    | thiol peroxidase                                         | 0 | 0 | 0.221 | 5  | 5  | 0  |
| DVU0841 | -      | aspartate aminotransferase, putative                     | 0 | 0 | 0.103 | 2  | 2  | 0  |
| DVU2519 | rpsI   | ribosomal protein S9                                     | 0 | 0 | 0.105 | 2  | 3  | -1 |
| DVU2982 | leuC   | 3-isopropylmalate dehydratase, large subunit, putative   | 0 | 0 | 0.107 | 2  | 3  | -1 |
| DVU1320 | rpsE   | ribosomal protein S5                                     | 0 | 0 | 0.109 | 2  | 3  | -1 |
| DVU1302 | rpsJ   | ribosomal protein S10                                    | 0 | 0 | 0.151 | 3  | 4  | -1 |
| DVU3185 | roO    | rubredoxin-oxygen oxidoreductase                         | 0 | 0 | 0.399 | 9  | 10 | -1 |
| DVU2776 | dsrC   | dissimilatory sulfite reductase, gamma subunit           | 0 | 0 | 0.321 | 7  | 8  | -1 |
| DVU1299 | rpsG   | ribosomal protein S7                                     | 0 | 0 | 0.197 | 4  | 5  | -1 |
| DVU1248 | argS   | arginyl-tRNA synthetase                                  | 0 | 0 | 0.198 | 4  | 5  | -1 |
| DVU1569 | porA   | pyruvate ferredoxin oxidoreductase, alpha subunit        | 0 | 0 | 0.117 | 2  | 3  | -1 |
| DVU0734 | cysG-1 | uroporphyrinogen III synthase/methyltransferase          | 0 | 0 | 0.127 | 2  | 3  | -1 |
| DVU2014 | fprA-1 | metallo-beta-lactamase family protein                    | 0 | 0 | 0.170 | 3  | 4  | -1 |
| DVU1300 | fusA-1 | translation elongation factor G                          | 0 | 0 | 0.753 | 17 | 18 | -1 |
| DVU0927 | rplU   | ribosomal protein L21                                    | 0 | 0 | 0.135 | 2  | 3  | -1 |
| DVU0849 | QmoB   | Quinone-interacting membrane-bound oxidoreductase        | 0 | 0 | 0.591 | 13 | 14 | -1 |
| DVU0995 | -      | ThiJ/Pfpl family protein                                 | 0 | 0 | 0.137 | 2  | 3  | -1 |
| DVU3104 | pal    | peptidoglycan-associated lipoprotein, putative           | 0 | Y | 0.144 | 2  | 3  | -1 |
| DVU1932 | adk    | adenylate kinase                                         | 0 | 0 | 0.521 | 11 | 13 | -2 |
| DVU0019 | ngr    | nigerythrin                                              | 0 | 0 | 0.154 | 2  | 4  | -2 |
| DVU1257 | -      | RNA-binding protein                                      | 0 | 0 | 0.280 | 5  | 7  | -2 |
| DVU0142 | trpS   | tryptophanyl-tRNA synthetase                             | 0 | 0 | 0.163 | 2  | 4  | -2 |
| DVU1179 | aor    | aldehyde:ferredoxin oxidoreductase, tungsten-containing  | 0 | 0 | 0.620 | 13 | 15 | -2 |
| DVU3187 | hup-4  | DNA-binding protein HU                                   | 0 | 0 | 0.175 | 2  | 4  | -2 |
| DVU2990 | moeA   | molybdopterin biosynthesis MoeA protein                  | 0 | 0 | 0.177 | 2  | 4  | -2 |
| DVU0958 | rplI   | ribosomal protein L9                                     | 0 | 0 | 0.222 | 3  | 5  | -2 |
| DVU3373 | ilvD   | dihydroxy-acid dehydratase                               | 0 | Y | 0.181 | 2  | 4  | -2 |
| DVU1043 | guaA   | GMP synthase                                             | 0 | 0 | 0.226 | 3  | 5  | -2 |
| DVU0848 | QmoA   | Quinone-interacting membrane-bound oxidoreductase        | 0 | Y | 0.227 | 3  | 5  | -2 |
| DVU3204 | purA   | adenylosuccinate synthetase                              | 0 | 0 | 0.249 | 3  | 6  | -3 |
| DVU2215 | -      | RNA-binding protein                                      | 0 | 0 | 0.255 | 3  | 6  | -3 |
| DVU0650 | -      | chelataase, putative                                     | 0 | Y | 0.265 | 3  | 6  | -3 |
| DVU0403 | dvsB   | dissimilatory sulfite reductase beta subunit             | 0 | 0 | 0.956 | 19 | 23 | -4 |
| DVU0322 | eno    | enolase                                                  | 0 | 0 | 0.266 | 2  | 6  | -4 |

|         |       |                                                |   |   |       |    |    |     |
|---------|-------|------------------------------------------------|---|---|-------|----|----|-----|
| DVU1977 | groES | chaperonin, 10 kDa                             | 0 | 0 | 0.601 | 10 | 15 | -5  |
| DVU0956 | rpsF  | ribosomal protein S6                           | 0 | Y | 0.314 | 3  | 8  | -5  |
| DVU0186 | -     | conserved hypothetical protein                 | 0 | 0 | 0.336 | 3  | 8  | -5  |
| DVU1203 | glyA  | serine hydroxymethyltransferase                | 0 | 0 | 0.381 | 4  | 9  | -5  |
| DVU1378 | ilvC  | ketol-acid reductoisomerase                    | 0 | 0 | 0.641 | 10 | 16 | -6  |
| DVU0404 | dsrD  | dissimilatory sulfite reductase D              | 0 | 0 | 0.331 | 2  | 8  | -6  |
| DVU2297 | -     | glycine/betaine/L-proline ABC transporter      | 0 | Y | 0.403 | 3  | 10 | -7  |
| DVU1334 | tig   | trigger factor                                 | 0 | 0 | 0.633 | 8  | 15 | -7  |
| DVU1328 | rpsD  | ribosomal protein S4                           | 0 | 0 | 0.386 | 2  | 9  | -7  |
| DVU1636 | ppaC  | inorganic pyrophosphatase, manganese-dependent | 0 | 0 | 1.370 | 24 | 33 | -9  |
| DVU1976 | groEL | chaperonin, 60 kDa                             | 0 | 0 | 1.283 | 20 | 31 | -11 |
| DVU3150 | rpsA  | ribosomal protein S1                           | 0 | 0 | 0.615 | 3  | 15 | -12 |
| DVU2920 | tuf   | translation elongation factor Tu               | 0 | 0 | 0.936 | 4  | 23 | -19 |
| DVU0402 | dsrA  | dissimilatory sulfite reductase alpha subunit  | 0 | 0 | 1.686 | 19 | 41 | -22 |
| DVU3025 | por   | pyruvate-ferredoxin                            | 0 | 0 | 1.869 | 18 | 45 | -27 |
| DVU2109 | mrp   | MTH1175-like domain family                     | 0 | 0 | 1.464 | 7  | 35 | -28 |
| DVU1295 | sat   | sulfate adenylyltransferase                    | 0 | 0 | 2.688 | 21 | 65 | -44 |
| DVU2405 | -     | alcohol dehydrogenase, iron-containing         | 0 | 0 | 2.061 | 2  | 50 | -48 |
| DVU0847 | ApsA  | adenylyl-sulphate reductase, alpha subunit     | 0 | 0 | 3.811 | 39 | 92 | -53 |
